# Supplementary material for: Evaluating agreement between bodies of evidence from randomized controlled trials and cohort studies in medical research: a meta-epidemiological study
Source: Springer Nature journal article supplement (doi:10.1186/s12916-022-02369-2), 2022-05-11
Supplement: MOESM1 [file 20392780]

## **Additional File 1**

### **Evaluating agreement between bodies of evidence from randomized controlled trials and cohort studies in medical research: a meta-epidemiological study**

Nils Bröckelmann<sup>1</sup>, Sara Balduzzi<sup>2</sup>, Louisa Harms<sup>1</sup>, Jessica Beyerbach<sup>1</sup>, Maria Petropoulou<sup>2</sup>, Charlotte Kubiak<sup>1</sup>, Martin Wolkewitz<sup>2</sup>, Joerg J Meerpohl<sup>1,3</sup>, Lukas Schwingshackl<sup>1</sup>

<sup>1</sup>Institute for Evidence in Medicine, Medical Center - University of Freiburg, Faculty of Medicine, University of Freiburg, Freiburg, Germany.

<sup>2</sup>Institute of Medical Biometry and Statistics, Faculty of Medicine and Medical Center - University of Freiburg, Freiburg, Germany.

<sup>3</sup>Cochrane Germany, Cochrane Germany Foundation, Freiburg, Germany.

## Table of contents

|                                                                                                                                                                                                                   |     |
|-------------------------------------------------------------------------------------------------------------------------------------------------------------------------------------------------------------------|-----|
| Appendix S1. Search strategy for systematic reviews in MEDLINE via PubMed (search date: 04.05.2020).....                                                                                                          | 2   |
| Figure S1. Flow diagram showing the process for identifying eligible systematic reviews .....                                                                                                                     | 3   |
| Table S1. Criteria for rating PI/ECO*-similarity degree between bodies of evidence from randomized controlled trials and cohort studies // *PI/ECO= population, intervention/ exposure, comparator, outcome ..... | 4   |
| Table S2. Overview of transformations made to the original data extraction.....                                                                                                                                   | 6   |
| Table S3. Reasons for exclusion of systematic reviews and corresponding articles in alphabetic order .....                                                                                                        | 8   |
| Table S4: Characteristics of included bodies of evidence from randomized controlled trials .....                                                                                                                  | 14  |
| Table S5. Certainty of the evidence and risk of bias for included bodies of evidence from randomized controlled trials .....                                                                                      | 49  |
| Table S6. Characteristics of included bodies of evidence from cohort studies .....                                                                                                                                | 64  |
| Table S7. Risk of bias and certainty of the evidence for included bodies of evidence from cohort studies.....                                                                                                     | 93  |
| Table S8. Overview of the instruments used for the assessment of risk of bias for bodies of evidence of RCTs and cohort studies, heat map.....                                                                    | 107 |
| Table S9. Ratings of PI/ECO*-similarity degree for included body of evidence-pairs // *PI/ECO= population, intervention/ exposure, comparator, outcome .....                                                      | 117 |
| Table S10. Effect estimates and statistical heterogeneity for meta-analyses of RCTs and cohort studies.....                                                                                                       | 123 |
| Figures S2a to S7: Forest Plots.....                                                                                                                                                                              | 131 |

| <b>Appendix S1. Search strategy for systematic reviews in MEDLINE via PubMed<br/>(search date: 04.05.2020)</b> |                                                                                                                                                                                                                                                                                                                                                                                                                                                                                             |
|----------------------------------------------------------------------------------------------------------------|---------------------------------------------------------------------------------------------------------------------------------------------------------------------------------------------------------------------------------------------------------------------------------------------------------------------------------------------------------------------------------------------------------------------------------------------------------------------------------------------|
| ID                                                                                                             | Search                                                                                                                                                                                                                                                                                                                                                                                                                                                                                      |
| #1                                                                                                             | "lancet london england"[Journal] OR "JAMA"[Journal] OR "bmj clinical research ed"[Journal] OR "jama internal medicine"[Journal] OR "Annals of internal medicine"[Journal] OR "PLoS medicine"[Journal] OR "BMC medicine"[Journal] OR "The Cochrane database of systematic reviews"[Journal] OR "Mayo Clinic proceedings"[Journal] OR "Canadian Medical Association journal"[Journal] OR "Nat Rev Dis Primers"[Journal] OR "J Cachexia Sarcopenia Muscle"[Journal] OR "N Engl J Med"[Journal] |
| #2                                                                                                             | "systematic review"[Title/Abstract] OR "systematic literature review"[Title/Abstract] OR "systematic scoping review"[Title/Abstract] OR "systematic meta-review"[Title/Abstract] OR "systematic search"[Title/Abstract] OR "systematic review"[Publication Type] OR "meta analys*"[Title/Abstract] OR "meta analys*"[Publication Type] OR "cochrane database syst rev"[Journal]                                                                                                             |
| #3                                                                                                             | "random*"[Title/Abstract] OR "placebo"[Title/Abstract] OR "clinical trials as topic"[MeSH Terms:noexp] OR "trial"[Title]                                                                                                                                                                                                                                                                                                                                                                    |
| #4                                                                                                             | "epidemiolog*"[Title/Abstract] OR "cohort stud*"[Title/Abstract] OR "observation*"[Title/Abstract] OR "non rct*"[Title/Abstract] OR "non random*"[Title/Abstract]                                                                                                                                                                                                                                                                                                                           |
| #5                                                                                                             | #1 AND #2 AND #3 AND #4                                                                                                                                                                                                                                                                                                                                                                                                                                                                     |
| #6                                                                                                             | #1 AND #2 AND #3 AND #4 Filters: from 2010/1/1 - 2019/12/31                                                                                                                                                                                                                                                                                                                                                                                                                                 |

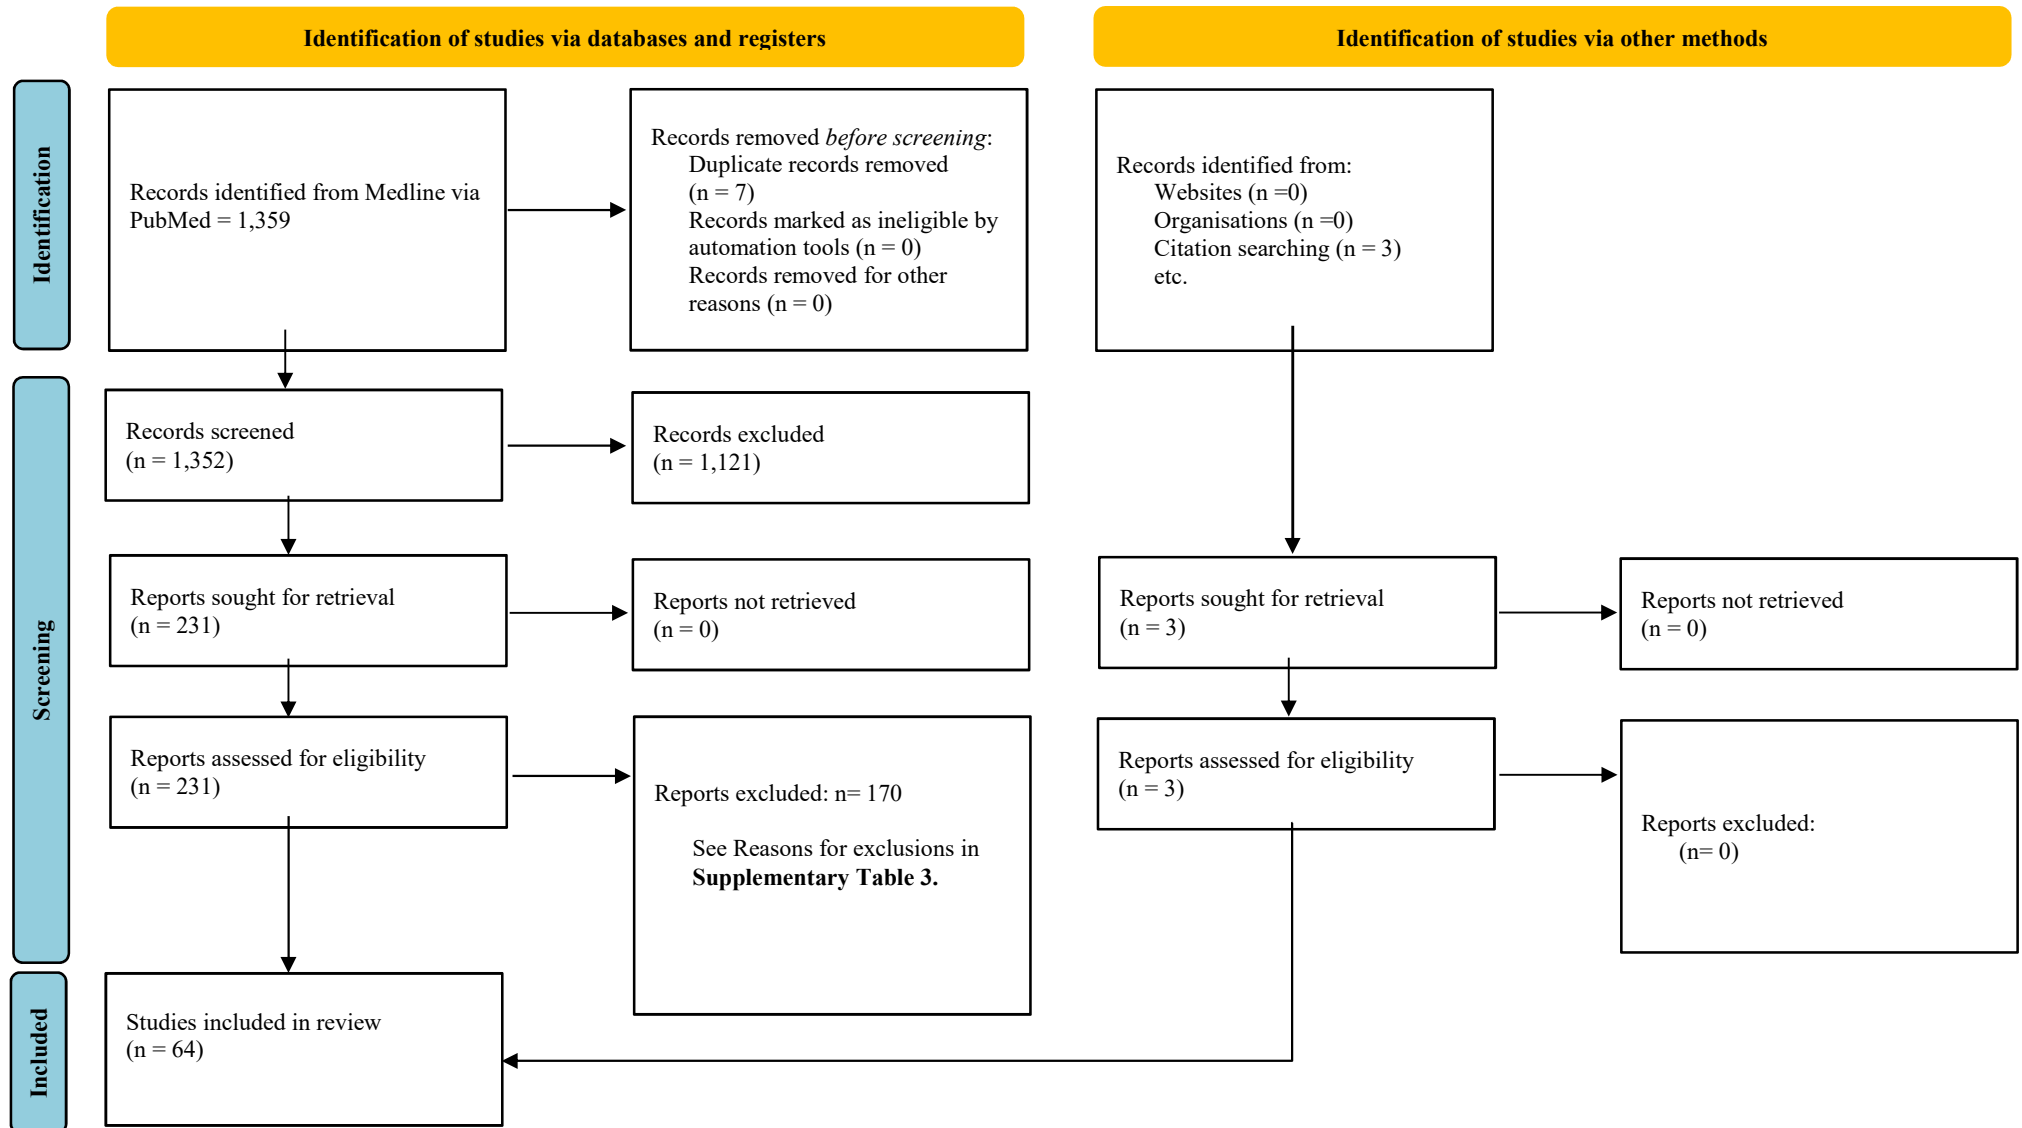

Figure S1. Flow diagram showing the process for identifying eligible systematic reviews

**Table S1. Criteria for rating PI/ECO\*-similarity degree between bodies of evidence from randomized controlled trials and cohort studies // \*PI/ECO= population, intervention/ exposure, comparator, outcome**

| Rating                                     | Population                                                                                                                                                                                                                                                   | Intervention/Exposure                                                                                                                                                                                                                                                                                                                                                                        | Comparator                                                                                                                                                                                                                                                                             | Outcome                                                                                                           |
|--------------------------------------------|--------------------------------------------------------------------------------------------------------------------------------------------------------------------------------------------------------------------------------------------------------------|----------------------------------------------------------------------------------------------------------------------------------------------------------------------------------------------------------------------------------------------------------------------------------------------------------------------------------------------------------------------------------------------|----------------------------------------------------------------------------------------------------------------------------------------------------------------------------------------------------------------------------------------------------------------------------------------|-------------------------------------------------------------------------------------------------------------------|
| <b>1 =<br/>“more or less identical”</b>    | Same health status and type of population                                                                                                                                                                                                                    | Same drug, invasive procedure, nutrition-intervention or vaccine                                                                                                                                                                                                                                                                                                                             | -Same drug or invasive procedure<br>-Nutrition: Placebo vs. Nil or low intake; low intake vs. low intake                                                                                                                                                                               | Same outcome                                                                                                      |
|                                            | e.g.<br>-Both BoE with either healthy population, general population or diseased population<br>-Same age category (both adults, both postmenopausal women)                                                                                                   | e.g.<br>- Both Enoxaparin<br>- Both PCI<br>- Both high dairy-intake                                                                                                                                                                                                                                                                                                                          | e.g.<br>-Both no Enoxaparin<br>-Both UKA<br>-Placebo vs. No intervention or low intake                                                                                                                                                                                                 | e.g.<br>Mortality in both BoE                                                                                     |
| <b>2 =<br/>“similar but not identical”</b> | Populations with mixed health status in RCTs and/or cohort studies                                                                                                                                                                                           | -Different drugs of the same class/ Any drug of the same class vs. specific drug of the same class<br>-Similar invasive procedure/ same invasive procedure with different co-interventions<br>-Similar vaccines or identical vaccine with different route of administration<br>-Supplementary or free food vs. Intake<br>-Similar but not identical time frame of intervention               | -Different drugs of the same class<br>-Similar invasive procedures, drug, vaccine or diet<br>-General dietary advice vs. High intake                                                                                                                                                   | -Similar outcome<br>-Both with mixed similar outcomes                                                             |
|                                            | e.g.<br>-Merged healthy and diseased population in one BoEvs. healthy population in the other BoE<br>-Both BoE with merged healthy and diseased population<br>-Population with cardiovascular risk factors (without manifest disease) vs. healthy population | e.g.<br>-Both different SGAs<br>-Both similar regional anaesthetic nerve blocks<br>-Various pneumococcal vaccines (2,3,12,14,17 and 23-valent) versus 23-valent only<br>-One or two doses of measles containing vaccines versus unclear number of doses<br>-Free non-caloric beverages vs. Low intake of SSBs<br>-Early intervention with different time frame (first 14 vs. First 24 hours) | e.g.<br>-Both different DDP-4 inhibitors<br>-“Best medical treatment” with Aspirin and additionally with various other drugs<br>-No vaccination or delayed vaccination versus no vaccination<br>-Transfemoral vs. transapical TAVI<br>-General dietary advice vs. High red meat intake | e.g.<br>-Late stage only or all CRC vs. All CRC<br>-Both with mixed sedation outcomes (e.g. Sleepiness, sedation) |

|                                  |                                                                                                                                                                           |                                                                                                                                                                                                                                                                                                       |                                                                                                                                                                                                                                                                                                                        |                                        |
|----------------------------------|---------------------------------------------------------------------------------------------------------------------------------------------------------------------------|-------------------------------------------------------------------------------------------------------------------------------------------------------------------------------------------------------------------------------------------------------------------------------------------------------|------------------------------------------------------------------------------------------------------------------------------------------------------------------------------------------------------------------------------------------------------------------------------------------------------------------------|----------------------------------------|
| <b>3 =<br/>“broadly similar”</b> | -Different health status of populations in RCTs and cohort studies<br>-Other substantial differences (e.g. Age-category, type of population)                              | -Same drug for different indication<br>-Enhanced treatment vs. Any treatment<br>-Supplement vs. Status<br>-Different time frame/ early treatment vs. Any treatment                                                                                                                                    | -Active intervention (drug, invasive procedure, nutrient) vs. No intervention or placebo<br>-Different time frame                                                                                                                                                                                                      | -Broadly similar                       |
|                                  | e.g.<br>-Healthy population in one BoE vs. population with cardiovascular disease in the other BoE<br>-Children/ adolescents vs. Adults<br>-Travellers vs. Pregnant women | e.g.<br>-Digoxin for HF vs. digoxin post-myocardial infarction without HF<br>-Dispatcher-assisted bystander CPR vs. Unassisted bystander CPR<br>-Enhanced training of birth attendants vs. any support by birth attendant<br>-Selenium supplements vs. High selenium status<br>-Early ART vs. Any ART | e.g.<br>-Restrictive transfusion vs. No transfusion<br>-Placebo vs. Low selenium status<br>-No vaccination of health care workers vs. low share of vaccinated health care workers per facility<br>-Pregnant women with untreated bacteriuria vs. pregnant without screening for bacteriuria<br>-Delayed ART vs. No ART | e.g.<br>-Colorectal adenoma vs. Cancer |

ART= antiretroviral therapy; BoE= bodies of evidence; CPR= cardiopulmonary resuscitation; CRC= colorectal cancer; DDP-4= dipeptidyl peptidase 4; HF= heart failure; PCI= percutaneous coronary intervention; PI/ECO= population, intervention/ exposure, comparator, outcome; RCT= randomized controlled trial; SGA= second-generation antipsychotic; SSBs= sugar-sweetened beverages; TAVI= transcatheter aortic valve replacement; UKA= unicompartmental knee arthroplasty.

**Table S2. Overview of transformations made to the original data extraction**

| Systematic review    | Outcome                  | Type of BoE (RCTs/<br>cohort studies) | n<br>(studies) | Original |            | What we used |            | Rationale                                                                                                                                                                                                                                                                                                                                              |
|----------------------|--------------------------|---------------------------------------|----------------|----------|------------|--------------|------------|--------------------------------------------------------------------------------------------------------------------------------------------------------------------------------------------------------------------------------------------------------------------------------------------------------------------------------------------------------|
|                      |                          |                                       |                | HR       | 95% CI     | RR           | 95% CI     |                                                                                                                                                                                                                                                                                                                                                        |
| Bloomfield 2016 (22) | Breast cancer            | RCT                                   | 1              | 0.43     | 0.21, 0.88 | 0.53         | 0.28, 1.03 | Number of patients and events in intervention and control group, 4.8 years median follow-up; Table 2. in Toledo 2015 (62)                                                                                                                                                                                                                              |
| Chung 2016 (56)      | Cardiovascular mortality | cohort studies                        | 6              | 0.99     | 0.97, 1.01 | 0.99         | 0.97, 1.01 | Data to calculate a RR for the HR were not available in the systematic review                                                                                                                                                                                                                                                                          |
| Johnston 2019 (23)   | Mortality                | RCT                                   | 1              | 0.99     | 0.95, 1.03 | 0.94         | 0.89, 0.99 | Number of patients and events in intervention and control group follow-up 9/30/2010; Supplementary table 2 in Thomson 2014 (63)                                                                                                                                                                                                                        |
| Johnston 2019 (23)   | Cardiovascular mortality | RCT                                   | 1              | 0.98     | 0.91, 1.06 | 1.00         | 0.84, 1.19 | Number of patients and events in intervention and control group for coronary heart disease death and fatal stroke, mean 8.1 years follow-up; Table 4 in Howard 2006 (64)                                                                                                                                                                               |
| Johnston 2019 (23)   | Cardiovascular disease   | RCT                                   | 1              | 0.99     | 0.94, 1.05 | 0.97         | 0.91, 1.04 | Number of patients and events in intervention and control group, mean 8.1 years follow-up; Table 4 in Howard 2006 (64)                                                                                                                                                                                                                                 |
| Pittas 2010 (60)     | Hypertension             | RCT                                   | 1              | 1.01     | 0.96, 1.06 | 1.01         | 0.97, 1.05 | Number of patients and events in intervention and control group, mean follow-up 7 years; Figure 2 in Margolis 2008 (65)                                                                                                                                                                                                                                |
|                      |                          |                                       |                | OR       | 95% CI     | RR           | 95% CI     |                                                                                                                                                                                                                                                                                                                                                        |
| Chung 2011(58)       | Colorectal cancer        | cohort studies                        | 9              | 0.94     | 0.91, 0.97 | 0.94         | 0.91, 0.97 | ACR= 0.0201; calculated as control group risk of the corresponding RCT Trivedi 2003 (66)                                                                                                                                                                                                                                                               |
| Chung 2011 (58)      | Breast cancer            | cohort studies                        | 4              | 0.99     | 0.97, 1.01 | 0.99         | 0.97, 1.01 | ACR= 0.0124; calculated as control group risk of the corresponding RCT Trivedi 2003 (66)                                                                                                                                                                                                                                                               |
| Kansagara 2013 (52)  | Mortality                | cohort studies                        | 11             | *        | *          | 2.49         | 1.40, 4.43 | Matching cohort studies (n=11) reporting 30-day mortality for blood transfusions (Supplemental Table 8) were included; ORs (n=5) were converted to RRs using the ACR= 0.0817 calculated as median control group risk from the included RCTs in Figure 1; data to convert HRs for (n=6) cohort studies were not available in the systematic review (52) |
| Li 2014 (54)         | Acute pancreatitis       | RCT                                   | 5              | 0.86     | 0.22, 3.39 | 0.86         | 0.22, 3.37 | ACR= 0.0020; calculated as the median control group risk of the included RCTs in Table 2 (54)                                                                                                                                                                                                                                                          |
|                      |                          | cohort studies                        | 2              | *        | *          | 0.92         | 0.69, 1.22 | Matching cohort studies (n=2) from Table 4 were included; The OR (n=1) was converted to a RR using the ACR= 0.0020 calculated as the median control group risk of the included RCTs in Table 2; data to convert the                                                                                                                                    |

|                      |                       |                |   |            |               |           |               |                                                                                                                                                                                                                                                                                        |
|----------------------|-----------------------|----------------|---|------------|---------------|-----------|---------------|----------------------------------------------------------------------------------------------------------------------------------------------------------------------------------------------------------------------------------------------------------------------------------------|
|                      |                       |                |   |            |               |           |               | HR (n=1) were not available in the systematic review (54)                                                                                                                                                                                                                              |
| Li 2016 (53)         | Heart failure         | cohort studies | 4 | *          | *             | 1.10      | 1.04, 1.16    | Matching cohort studies (n=4) from Table 5/6 were included; ORs (n=3) were converted to RRs using the ACR= 0.0016 calculated as the median control group risk of the included RCTs in Appendix Figure E; data to convert one HR (n=1) were not available in the systematic review (53) |
| Vinceti 2018 (59)    | Any cancer            | cohort studies | 7 | 0.72       | 0.55, 0.93    | 0.75      | 0.59, 0.94    | ACR= 0.1509; calculated as the median control group risk of the corresponding RCTs in Analysis 1.1. Comparison 1 (59)                                                                                                                                                                  |
| Vinceti 2018 (59)    | Cancer mortality      | cohort studies | 7 | 0.76       | 0.59, 0.97    | 0.77      | 0.60, 0.97    | ACR= 0.0597; calculated as the median control group risk of the corresponding RCTs Analysis 1.2. Comparison 1 (59)                                                                                                                                                                     |
| Vinceti 2018 (59)    | Colorectal cancer     | cohort studies | 6 | 0.82       | 0.72, 0.94    | 0.82      | 0.72, 0.94    | ACR= 0.0077; calculated as the median control group risk of the corresponding RCTs Analysis 1.5. Comparison 1 (59)                                                                                                                                                                     |
|                      |                       |                |   | <b>RD</b>  | <b>95% CI</b> | <b>RR</b> | <b>95% CI</b> |                                                                                                                                                                                                                                                                                        |
| Yank 2011 (44)       | Mortality             | RCTs           | 2 | 0.01       | -0.05, 0.06   | 1.40      | 0.49, 4.02    | Common meta-analysis for RCTs and cohort studies using a Risk difference was separated and effect measures converted to RRs using data in Figure 2 & 3 (44)                                                                                                                            |
|                      |                       | cohort studies | 2 |            |               | 0.91      | 0.39, 2.12    |                                                                                                                                                                                                                                                                                        |
| Yank 2011 (44)       | Thromboembolic events | RCTs           | 2 | 0.05       | 0.01, 0.10    | 2.06      | 0.48, 8.84    |                                                                                                                                                                                                                                                                                        |
|                      |                       | cohort studies | 2 |            |               | 1.81      | 0.67, 4.87    |                                                                                                                                                                                                                                                                                        |
|                      |                       |                |   | <b>SMD</b> | <b>95% CI</b> | <b>MD</b> | <b>95% CI</b> |                                                                                                                                                                                                                                                                                        |
| Te Morenga 2013 (61) | BMI                   | RCTs           | 3 | 0.09       | -0.14, 0.32   | -0.06     | -0.15, 0.04   | Meta-analysis of RCTs (n=5) shown in Figure 6 using SMD; we included only RCTs reporting the outcome BMI (n=3)                                                                                                                                                                         |

\*studies were not pooled in the original publication; ACR= assumed control risk; HR= hazard ratio; MD= mean difference; OR= odds ratio; RCT= randomized controlled trial; RR= risk ratio; SMD= standardized mean difference.



**Table S3. Reasons for exclusion of systematic reviews and corresponding articles in alphabetic order**

| <b>Methods of systematic reviews: Excluded RCTs or cohort studies, searches not equivalent for RCTs and cohort studies, no meta-analysis, evaluation of diagnostic accuracy, individual patient data analysis; n=56 articles</b>                                                                                                                          |
|-----------------------------------------------------------------------------------------------------------------------------------------------------------------------------------------------------------------------------------------------------------------------------------------------------------------------------------------------------------|
| – Brodie D, Slutsky AS, Combes A. Extracorporeal Life Support for Adults With Respiratory Failure and Related Indications: A Review. <i>Jama</i> . 2019;322(6):557-68.                                                                                                                                                                                    |
| – Baker PR, Francis DP, Soares J, Weightman AL, Foster C. Community wide interventions for increasing physical activity. <i>Cochrane Database Syst Rev</i> . 2011(4):Cd008366.                                                                                                                                                                            |
| – Baker PR, Francis DP, Soares J, Weightman AL, Foster C. Community wide interventions for increasing physical activity. <i>Cochrane Database Syst Rev</i> . 2015;1:Cd008366.                                                                                                                                                                             |
| – Bannuru RR, Dvorak T, Obadan N, Yu WW, Patel K, Chung M, et al. Comparative evaluation of radiation treatments for clinically localized prostate cancer: an updated systematic review. <i>Ann Intern Med</i> . 2011;155(3):171-8.                                                                                                                       |
| – Borst SE, Shuster JJ, Zou B, Ye F, Jia H, Wokhlu A, et al. Cardiovascular risks and elevation of serum DHT vary by route of testosterone administration: a systematic review and meta-analysis. <i>BMC Med</i> . 2014;12:211.                                                                                                                           |
| – Bourke JP, Bueser T, Quinlivan R. Interventions for preventing and treating cardiac complications in Duchenne and Becker muscular dystrophy and X-linked dilated cardiomyopathy. <i>Cochrane Database Syst Rev</i> . 2018;10:Cd009068.                                                                                                                  |
| – Carter JL, Coletti RJ, Harris RP. Quantifying and monitoring overdiagnosis in cancer screening: a systematic review of methods. <i>Bmj</i> . 2015;350:g7773.                                                                                                                                                                                            |
| – Chingcuanco F, Segal JB, Kim SC, Alexander GC. Bioequivalence of Biosimilar Tumor Necrosis Factor-alpha Inhibitors Compared With Their Reference Biologics: A Systematic Review. <i>Ann Intern Med</i> . 2016;165(8):565-74.                                                                                                                            |
| – Chou R, Cantor AG, Zakher B, Bougatsos C. Screening for HIV in pregnant women: systematic review to update the 2005 U.S. Preventive Services Task Force recommendation. <i>Ann Intern Med</i> . 2012;157(10):719-28.                                                                                                                                    |
| – Chou R, Selph S, Dana T, Bougatsos C, Zakher B, Blazina I, et al. Screening for HIV: systematic review to update the 2005 U.S. Preventive Services Task Force recommendation. <i>Ann Intern Med</i> . 2012;157(10):706-18.                                                                                                                              |
| – Chou R, Dana T, Bougatsos C, Blazina I, Starmer AJ, Reitel K, et al. Pressure ulcer risk assessment and prevention: a systematic comparative effectiveness review. <i>Ann Intern Med</i> . 2013;159(1):28-38.                                                                                                                                           |
| – Chou R, Korthuis PT, McCarty D, Coffin PO, Griffin JC, Davis-O'Reilly C, et al. Management of Suspected Opioid Overdose With Naloxone in Out-of-Hospital Settings: A Systematic Review. <i>Ann Intern Med</i> . 2017;167(12):867-75.                                                                                                                    |
| – Chowdhury R, Ramond A, O'Keefe LM, Shahzad S, Kunutsor SK, Muka T, et al. Environmental toxic metal contaminants and risk of cardiovascular disease: systematic review and meta-analysis. <i>Bmj</i> . 2018;362:k3310.                                                                                                                                  |
| – Colebatch AN, Marks JL, Edwards CJ. Safety of non-steroidal anti-inflammatory drugs, including aspirin and paracetamol (acetaminophen) in people receiving methotrexate for inflammatory arthritis (rheumatoid arthritis, ankylosing spondylitis, psoriatic arthritis, other spondyloarthritis). <i>Cochrane Database Syst Rev</i> . 2011(11):Cd008872. |
| – Type and timing of menopausal hormone therapy and breast cancer risk: individual participant meta-analysis of the worldwide epidemiological evidence. <i>Lancet</i> . 2019;394(10204):1159-68.                                                                                                                                                          |
| – Dahabreh IJ, Chung M, Balk EM, Yu WW, Mathew P, Lau J, et al. Active surveillance in men with localized prostate cancer: a systematic review. <i>Ann Intern Med</i> . 2012;156(8):582-90.                                                                                                                                                               |
| – Demicheli V, Jefferson T, Di Pietrantonj C, Ferroni E, Thorning S, Thomas RE, et al. Vaccines for preventing influenza in the elderly. <i>Cochrane Database Syst Rev</i> . 2018;2:Cd004876.                                                                                                                                                             |
| – Demicheli V, Jefferson T, Ferroni E, Rivetti A, Di Pietrantonj C. Vaccines for preventing influenza in healthy adults. <i>Cochrane Database Syst Rev</i> . 2018;2:Cd001269.                                                                                                                                                                             |
| – Des Guetz G, Uzzan B, Morere JF, Perret G, Nicolas P. Duration of adjuvant chemotherapy for patients with non-metastatic colorectal cancer. <i>Cochrane Database Syst Rev</i> . 2010(1):Cd007046.                                                                                                                                                       |
| – Drekonja DM, Butler M, MacDonald R, Bliss D, Filice GA, Rector TS, et al. Comparative effectiveness of <i>Clostridium difficile</i> treatments: a systematic review. <i>Ann Intern Med</i> . 2011;155(12):839-47.                                                                                                                                       |
| – Frank JW, Lovejoy TI, Becker WC, Morasco BJ, Koenig CJ, Hoeffcker L, et al. Patient Outcomes in Dose Reduction or Discontinuation of Long-Term Opioid Therapy: A Systematic Review. <i>Ann Intern Med</i> . 2017;167(3):181-91.                                                                                                                         |
| – Goldzweig CL, Orshansky G, Paige NM, Towfigh AA, Haggstrom DA, Miake-Lye I, et al. Electronic patient portals: evidence on health outcomes, satisfaction, efficiency, and attitudes: a systematic review. <i>Ann Intern Med</i> . 2013;159(10):677-87.                                                                                                  |
| – Harder T, Wichmann O, Klug SJ, van der Sande MAB, Wiese-Posselt M. Efficacy, effectiveness and safety of vaccination against human papillomavirus in males: a systematic review. <i>BMC Med</i> . 2018;16(1):110.                                                                                                                                       |
| – Hollingsworth JM, Rogers MA, Krein SL, Hickner A, Kuhn L, Cheng A, et al. Determining the noninfectious complications of indwelling urethral catheters: a systematic review and meta-analysis. <i>Ann Intern Med</i> . 2013;159(6):401-10.                                                                                                              |
| – Humphrey LL, Deffebach M, Pappas M, Baumann C, Artis K, Mitchell JP, et al. Screening for lung cancer with low-dose computed tomography: a systematic review to update the US Preventive services task force recommendation. <i>Ann Intern Med</i> . 2013;159(6):411-20.                                                                                |
| – Jefferson T, Rivetti A, Di Pietrantonj C, Demicheli V. Vaccines for preventing influenza in healthy children. <i>Cochrane Database Syst Rev</i> . 2018;2:Cd004879.                                                                                                                                                                                      |
| – Jiang B, Chaichana K, Veeravagu A, Chang SD, Black KL, Patil CG. Biopsy versus resection for the management of low-grade gliomas. <i>Cochrane Database Syst Rev</i> . 2017;4:Cd009319.                                                                                                                                                                  |
| – Johnson SA, Stevens SM, Woller SC, Lake E, Donadini M, Cheng J, et al. Risk of deep vein thrombosis following a single negative whole-leg compression ultrasound: a systematic review and meta-analysis. <i>Jama</i> . 2010;303(5):438-45.                                                                                                              |
| – Jullien S, Ryan H, Modi M, Bhatia R. Six months therapy for tuberculous meningitis. <i>Cochrane Database Syst Rev</i> . 2016;9(9):Cd012091.                                                                                                                                                                                                             |
| – Kardamanidis K, Martiniuk A, Ivers RQ, Stevenson MR, Thistlethwaite K. Motorcycle rider training for the prevention of road traffic crashes. <i>Cochrane Database Syst Rev</i> . 2010(10):Cd005240.                                                                                                                                                     |

- Khan F, Rahman A, Carrier M, Kearon C, Weitz JI, Schulman S, et al. Long term risk of symptomatic recurrent venous thromboembolism after discontinuation of anticoagulant treatment for first unprovoked venous thromboembolism event: systematic review and meta-analysis. *Bmj*. 2019;366:l4363.
- Lee JS, Giesler DL, Gellad WF, Fine MJ. Antibiotic Therapy for Adults Hospitalized With Community-Acquired Pneumonia: A Systematic Review. *Jama*. 2016;315(6):593-602.
- Leffers N, Daemen T, Helfrich W, Boezen HM, Cohlen BJ, Melief K, et al. Antigen-specific active immunotherapy for ovarian cancer. *Cochrane Database Syst Rev*. 2010(1):Cd007287.
- Leffers N, Daemen T, Helfrich W, Boezen HM, Cohlen BJ, Melief CJ, et al. Antigen-specific active immunotherapy for ovarian cancer. *Cochrane Database Syst Rev*. 2014(9):Cd007287.
- Lip GY, Shantsila E. Anticoagulation versus placebo for heart failure in sinus rhythm. *Cochrane Database Syst Rev*. 2014(3):Cd003336.
- Lopez LM, Bernholc A, Chen M, Grey TW, Otterness C, Westhoff C, et al. Hormonal contraceptives for contraception in overweight or obese women. *Cochrane Database Syst Rev*. 2016(8):Cd008452.
- Lopez LM, Grey TW, Tolley EE, Chen M. Brief educational strategies for improving contraception use in young people. *Cochrane Database Syst Rev*. 2016;3:Cd012025.
- Lopez LM, Ramesh S, Chen M, Edelman A, Otterness C, Trussell J, et al. Progestin-only contraceptives: effects on weight. *Cochrane Database Syst Rev*. 2016(8):Cd008815.
- Maguire MJ, Weston J, Singh J, Marson AG. Antidepressants for people with epilepsy and depression. *Cochrane Database Syst Rev*. 2014(12):Cd010682.
- Michelena HI, Abel MD, Suri RM, Freeman WK, Click RL, Sundt TM, et al. Intraoperative echocardiography in valvular heart disease: an evidence-based appraisal. *Mayo Clin Proc*. 2010;85(7):646-55.
- Mohammed Vashist N, Samaan M, Mosli MH, Parker CE, MacDonald JK, Nelson SA, et al. Endoscopic scoring indices for evaluation of disease activity in ulcerative colitis. *Cochrane Database Syst Rev*. 2018;1:Cd011450.
- Mosli MH, Parker CE, Nelson SA, Baker KA, MacDonald JK, Zou GY, et al. Histologic scoring indices for evaluation of disease activity in ulcerative colitis. *Cochrane Database Syst Rev*. 2017;5:Cd011256.
- Mussa FF, Horton JD, Moridzadeh R, Nicholson J, Trimarchi S, Eagle KA. Acute Aortic Dissection and Intramural Hematoma: A Systematic Review. *Jama*. 2016;316(7):754-63.
- Nelson HD, Pappas M, Cantor A, Haney E, Holmes R. Risk Assessment, Genetic Counseling, and Genetic Testing for BRCA-Related Cancer in Women: Updated Evidence Report and Systematic Review for the US Preventive Services Task Force. *Jama*. 2019;322(7):666-85.
- Novak G, Parker CE, Pai RK, MacDonald JK, Feagan BG, Sandborn WJ, et al. Histologic scoring indices for evaluation of disease activity in Crohn's disease. *Cochrane Database Syst Rev*. 2017;7:Cd012351.
- Paijens ST, Leffers N, Daemen T, Helfrich W, Boezen HM, Cohlen BJ, et al. Antigen-specific active immunotherapy for ovarian cancer. *Cochrane Database Syst Rev*. 2018;9:Cd007287.
- Pepper DJ, Jaswal D, Sun J, Welsh J, Natanson C, Eichacker PQ. Evidence Underpinning the Centers for Medicare & Medicaid Services' Severe Sepsis and Septic Shock Management Bundle (SEP-1): A Systematic Review. *Ann Intern Med*. 2018;168(8):558-68.
- Selph SS, Bougatsos C, Dana T, Grusing S, Chou R. Screening for HIV Infection in Pregnant Women: Updated Evidence Report and Systematic Review for the US Preventive Services Task Force. *Jama*. 2019;321(23):2349-60.
- Simmonds MC, Brown JV, Heirs MK, Higgins JP, Mannion RJ, Rodgers MA, et al. Safety and effectiveness of recombinant human bone morphogenetic protein-2 for spinal fusion: a meta-analysis of individual-participant data. *Ann Intern Med*. 2013;158(12):877-89.
- Singh JA, Hossain A, Kotb A, Wells G. Risk of serious infections with immunosuppressive drugs and glucocorticoids for lupus nephritis: a systematic review and network meta-analysis. *BMC Med*. 2016;14(1):137.
- Sturt AS, Dokubo EK, Sint TT. Antiretroviral therapy (ART) for treating HIV infection in ART-eligible pregnant women. *Cochrane Database Syst Rev*. 2010(3):Cd008440.
- Thorlund JB, Juhl CB, Roos EM, Lohmander LS. Arthroscopic surgery for degenerative knee: systematic review and meta-analysis of benefits and harms. *Bmj*. 2015;350:h2747.
- Valenti R, Pantoni L, Markus HS. Treatment of vascular risk factors in patients with a diagnosis of Alzheimer's disease: a systematic review. *BMC Med*. 2014;12:160.
- Wallis CJ, Mahar AL, Choo R, Herschorn S, Kodama RT, Shah PS, et al. Second malignancies after radiotherapy for prostate cancer: systematic review and meta-analysis. *Bmj*. 2016;352:i851.
- Yang L, Sahlqvist S, McMinn A, Griffin SJ, Ogilvie D. Interventions to promote cycling: systematic review. *Bmj*. 2010;341:c5293.
- Yotsu RR, Richardson M, Ishii N. Drugs for treating Buruli ulcer (*Mycobacterium ulcerans* disease). *Cochrane Database Syst Rev*. 2018;8:Cd012118.

#### **Umbrella review; n=16 articles**

- Adam SS, McDuffie JR, Ortel TL, Williams JW. Comparative effectiveness of warfarin and new oral anticoagulants for the management of atrial fibrillation and venous thromboembolism: a systematic review. *Ann Intern Med*. 2012;157(11):796-807.
- Bhutta ZA, Yakoob MY, Lawn JE, Rizvi A, Friberg IK, Weissman E, et al. Stillbirths: what difference can we make and at what cost? *Lancet*. 2011;377(9776):1523-38.
- Chou R, Dana T, Bougatsos C, Blazina I, Khangura J, Zakher B. Screening for hepatitis B virus infection in adolescents and adults: a systematic review to update the U.S. Preventive Services Task Force recommendation. *Ann Intern Med*. 2014;161(1):31-45.
- Coker TR, Chan LS, Newberry SJ, Limbos MA, Suttorp MJ, Shekelle PG, et al. Diagnosis, microbial epidemiology, and antibiotic treatment of acute otitis media in children: a systematic review. *Jama*. 2010;304(19):2161-9.
- Demicheli V, Jefferson T, Al-Ansary LA, Ferroni E, Rivetti A, Di Pietrantonj C. Vaccines for preventing influenza in healthy adults. *Cochrane Database Syst Rev*. 2014(3):Cd001269.

- Fu R, Selph S, McDonagh M, Peterson K, Tiwari A, Chou R, et al. Effectiveness and harms of recombinant human bone morphogenetic protein-2 in spine fusion: a systematic review and meta-analysis. *Ann Intern Med.* 2013;158(12):890-902.
- Gartlehner G, Hansen RA, Morgan LC, Thaler K, Lux L, Van Noord M, et al. Comparative benefits and harms of second-generation antidepressants for treating major depressive disorder: an updated meta-analysis. *Ann Intern Med.* 2011;155(11):772-85.
- Ierodiakonou D, Garcia-Larsen V, Logan A, Groome A, Cunha S, Chivinge J, et al. Timing of Allergenic Food Introduction to the Infant Diet and Risk of Allergic or Autoimmune Disease: A Systematic Review and Meta-analysis. *Jama.* 2016;316(11):1181-92.
- Jonas DE, Amick HR, Feltner C, Weber RP, Arvanitis M, Stine A, et al. Screening for Obstructive Sleep Apnea in Adults: Evidence Report and Systematic Review for the US Preventive Services Task Force. *Jama.* 2017;317(4):415-33.
- Jonas DE, Kahwati LC, Yun JDY, Middleton JC, Coker-Schwimmer M, Asher GN. Screening for Atrial Fibrillation With Electrocardiography: Evidence Report and Systematic Review for the US Preventive Services Task Force. *Jama.* 2018;320(5):485-98.
- LeBlanc ES, Patnode CD, Webber EM, Redmond N, Rushkin M, O'Connor EA. Behavioral and Pharmacotherapy Weight Loss Interventions to Prevent Obesity-Related Morbidity and Mortality in Adults: Updated Evidence Report and Systematic Review for the US Preventive Services Task Force. *Jama.* 2018;320(11):1172-91.
- Melnikow J, Henderson JT, Burda BU, Senger CA, Durbin S, Weyrich MS. Screening for Cervical Cancer With High-Risk Human Papillomavirus Testing: Updated Evidence Report and Systematic Review for the US Preventive Services Task Force. *Jama.* 2018;320(7):687-705.
- Nelson HD, Smith ME, Griffin JC, Fu R. Use of medications to reduce risk for primary breast cancer: a systematic review for the U.S. Preventive Services Task Force. *Ann Intern Med.* 2013;158(8):604-14.
- Nelson HD, Fu R, Cantor A, Pappas M, Daeges M, Humphrey L. Effectiveness of Breast Cancer Screening: Systematic Review and Meta-analysis to Update the 2009 U.S. Preventive Services Task Force Recommendation. *Ann Intern Med.* 2016;164(4):244-55.
- Shekelle PG, Newberry SJ, FitzGerald JD, Motala A, O'Hanlon CE, Tariq A, et al. Management of Gout: A Systematic Review in Support of an American College of Physicians Clinical Practice Guideline. *Ann Intern Med.* 2017;166(1):37-51.
- Viswanathan M, Treiman KA, Kish-Doto J, Middleton JC, Coker-Schwimmer EJ, Nicholson WK. Folic Acid Supplementation for the Prevention of Neural Tube Defects: An Updated Evidence Report and Systematic Review for the US Preventive Services Task Force. *Jama.* 2017;317(2):190-203.

#### **Updated version of Systematic review included; n=3 articles**

- Dennert G, Zwahlen M, Brinkman M, Vinceti M, Zeegers MP, Horneber M. Selenium for preventing cancer. *Cochrane Database Syst Rev.* 2011(5):Cd005195.
- Zhang XL, Zhu QQ, Kang LN, Li XL, Xu B. Mid- and Long-Term Outcome Comparisons of Everolimus-Eluting Bioresorbable Scaffolds Versus Everolimus-Eluting Metallic Stents: A Systematic Review and Meta-analysis. *Ann Intern Med.* 2017;167(9):642-54.
- Anglemyer A, Rutherford GW, Baggaley RC, Egger M, Siegfried N. Antiretroviral therapy for prevention of HIV transmission in HIV-discordant couples. *Cochrane Database Syst Rev.* 2011(8):Cd009153.

#### **No eligible BoE-pair; n=78 articles**

- Aburto NJ, Hanson S, Gutierrez H, Hooper L, Elliott P, Cappuccio FP. Effect of increased potassium intake on cardiovascular risk factors and disease: systematic review and meta-analyses. *Bmj.* 2013;346:f1378.
- Aibana O, Huang CC, Aboud S, Arnedo-Pena A, Becerra MC, Bellido-Blasco JB, et al. Vitamin D status and risk of incident tuberculosis disease: A nested case-control study, systematic review, and individual-participant data meta-analysis. *PLoS Med.* 2019;16(9):e1002907.
- Anglemyer A, Horvath T, Rutherford G. The accessibility of firearms and risk for suicide and homicide victimization among household members: a systematic review and meta-analysis. *Ann Intern Med.* 2014;160(2):101-10.
- Baalbergen A, Veenstra Y, Stalpers LL, Ansink AC. Primary surgery versus primary radiation therapy with or without chemotherapy for early adenocarcinoma of the uterine cervix. *Cochrane Database Syst Rev.* 2010(1):Cd006248.
- Baalbergen A, Veenstra Y, Stalpers L. Primary surgery versus primary radiotherapy with or without chemotherapy for early adenocarcinoma of the uterine cervix. *Cochrane Database Syst Rev.* 2013(1):Cd006248.
- Bach PB, Mirkin JN, Oliver TK, Azzoli CG, Berry DA, Brawley OW, et al. Benefits and harms of CT screening for lung cancer: a systematic review. *Jama.* 2012;307(22):2418-29.
- Bao W, Rong Y, Rong S, Liu L. Dietary iron intake, body iron stores, and the risk of type 2 diabetes: a systematic review and meta-analysis. *BMC Med.* 2012;10:119.
- Booth RA, Ansari MT, Loit E, Tricco AC, Weeks L, Doucette S, et al. Assessment of thiopurine S-methyltransferase activity in patients prescribed thiopurines: a systematic review. *Ann Intern Med.* 2011;154(12):814-23, w-295-8.
- Carrier M, Le Gal G, Wells PS, Rodger MA. Systematic review: case-fatality rates of recurrent venous thromboembolism and major bleeding events among patients treated for venous thromboembolism. *Ann Intern Med.* 2010;152(9):578-89.
- Chang LW, Harris J, Humphreys E. Optimal monitoring strategies for guiding when to switch first-line antiretroviral therapy regimens for treatment failure in adults and adolescents living with HIV in low-resource settings. *Cochrane Database Syst Rev.* 2010(4):Cd008494.
- Chou R, Cottrell EB, Wasson N, Rahman B, Guise JM. Screening for hepatitis C virus infection in adults: a systematic review for the U.S. Preventive Services Task Force. *Ann Intern Med.* 2013;158(2):101-8.
- Chou R, Hartung D, Rahman B, Wasson N, Cottrell EB, Fu R. Comparative effectiveness of antiviral treatment for hepatitis C virus infection in adults: a systematic review. *Ann Intern Med.* 2013;158(2):114-23.
- Chou R, Evans C, Hoverman A, Sun C, Dana T, Bougatsos C, et al. Preexposure Prophylaxis for the Prevention of HIV Infection: Evidence Report and Systematic Review for the US Preventive Services Task Force. *Jama.* 2019;321(22):2214-30.
- Costelloe C, Metcalfe C, Lovering A, Mant D, Hay AD. Effect of antibiotic prescribing in primary care on antimicrobial resistance in individual patients: systematic review and meta-analysis. *Bmj.* 2010;340:c2096.
- Dangour AD, Watson L, Cumming O, Boisson S, Che Y, Velleman Y, et al. Interventions to improve water quality and supply,

- sanitation and hygiene practices, and their effects on the nutritional status of children. *Cochrane Database Syst Rev.* 2013(8):Cd009382.
- Davey P, Marwick CA, Scott CL, Charani E, McNeil K, Brown E, et al. Interventions to improve antibiotic prescribing practices for hospital inpatients. *Cochrane Database Syst Rev.* 2017;2:Cd003543.
  - Edmond KM, Kortsalioudaki C, Scott S, Schrag SJ, Zaidi AK, Cousens S, et al. Group B streptococcal disease in infants aged younger than 3 months: systematic review and meta-analysis. *Lancet.* 2012;379(9815):547-56.
  - Fayad AI, Buamscha DG, Ciapponi A. Intensity of continuous renal replacement therapy for acute kidney injury. *Cochrane Database Syst Rev.* 2016;10:Cd010613.
  - Goudet SM, Bogin BA, Madise NJ, Griffiths PL. Nutritional interventions for preventing stunting in children (birth to 59 months) living in urban slums in low- and middle-income countries (LMIC). *Cochrane Database Syst Rev.* 2019;6(6):Cd011695.
  - Gowing L, Ali R, White JM. Opioid antagonists with minimal sedation for opioid withdrawal. *Cochrane Database Syst Rev.* 2017;5:Cd002021.
  - Gurusamy KS, Nagendran M, Guerrini GP, Toon CD, Zinnuroglu M, Davidson BR. Intraperitoneal local anaesthetic instillation versus no intraperitoneal local anaesthetic instillation for laparoscopic cholecystectomy. *Cochrane Database Syst Rev.* 2014(3):Cd007337.
  - Haider BA, Olofin I, Wang M, Spiegelman D, Ezzati M, Fawzi WW. Anaemia, prenatal iron use, and risk of adverse pregnancy outcomes: systematic review and meta-analysis. *Bmj.* 2013;346:f3443.
  - Hartling L, Abou-Setta AM, Dursun S, Mousavi SS, Pasichnyk D, Newton AS. Antipsychotics in adults with schizophrenia: comparative effectiveness of first-generation versus second-generation medications: a systematic review and meta-analysis. *Ann Intern Med.* 2012;157(7):498-511.
  - Henderson JT, Whitlock EP, O'Connor E, Senger CA, Thompson JH, Rowland MG. Low-dose aspirin for prevention of morbidity and mortality from preeclampsia: a systematic evidence review for the U.S. Preventive Services Task Force. *Ann Intern Med.* 2014;160(10):695-703.
  - Henson CC, Burden S, Davidson SE, Lal S. Nutritional interventions for reducing gastrointestinal toxicity in adults undergoing radical pelvic radiotherapy. *Cochrane Database Syst Rev.* 2013(11):Cd009896.
  - Imdad A, Nicholson MR, Tanner-Smith EE, Zackular JP, Gomez-Duarte OG, Beaulieu DB, et al. Fecal transplantation for treatment of inflammatory bowel disease. *Cochrane Database Syst Rev.* 2018;11:Cd012774.
  - Jefferson T, Di Pietrantonj C, Rivetti A, Bawazeer GA, Al-Ansary LA, Ferroni E. Vaccines for preventing influenza in healthy adults. *Cochrane Database Syst Rev.* 2010(7):Cd001269.
  - Jonas DE, Amick HR, Feltner C, Bobashev G, Thomas K, Wines R, et al. Pharmacotherapy for adults with alcohol use disorders in outpatient settings: a systematic review and meta-analysis. *Jama.* 2014;311(18):1889-900.
  - Jonas DE, Reddy S, Middleton JC, Barclay C, Green J, Baker C, et al. Screening for Cardiovascular Disease Risk With Resting or Exercise Electrocardiography: Evidence Report and Systematic Review for the US Preventive Services Task Force. *Jama.* 2018;319(22):2315-28.
  - Kahn SR, Morrison DR, Cohen JM, Emed J, Tagalakis V, Roussin A, et al. Interventions for implementation of thromboprophylaxis in hospitalized medical and surgical patients at risk for venous thromboembolism. *Cochrane Database Syst Rev.* 2013(7):Cd008201.
  - Khanna R, Nelson SA, Feagan BG, D'Haens G, Sandborn WJ, Zou GY, et al. Endoscopic scoring indices for evaluation of disease activity in Crohn's disease. *Cochrane Database Syst Rev.* 2016(8):Cd010642.
  - Kredo T, Ford N, Adeniyi FB, Garner P. Decentralising HIV treatment in lower- and middle-income countries. *Cochrane Database Syst Rev.* 2013(6):Cd009987.
  - Kroon FP, van der Burg LR, Ramiro S, Landewe RB, Buchbinder R, Falzon L, et al. Non-steroidal anti-inflammatory drugs (NSAIDs) for axial spondyloarthritis (ankylosing spondylitis and non-radiographic axial spondyloarthritis). *Cochrane Database Syst Rev.* 2015(7):Cd010952.
  - Kunisaki KM, Greer N, Khalil W, Koffel E, Koeller E, MacDonald R, et al. Provider Types and Outcomes in Obstructive Sleep Apnea Case Finding and Treatment: A Systematic Review. *Ann Intern Med.* 2018;168(3):195-202.
  - Kyrgiou M, Athanasiou A, Kalliala IEJ, Paraskevaidi M, Mitra A, Martin-Hirsch PP, et al. Obstetric outcomes after conservative treatment for cervical intraepithelial lesions and early invasive disease. *Cochrane Database Syst Rev.* 2017;11(11):Cd012847.
  - Langstrom N, Enebrink P, Lauren EM, Lindblom J, Werko S, Hanson RK. Preventing sexual abusers of children from reoffending: systematic review of medical and psychological interventions. *Bmj.* 2013;347:f4630.
  - Lansbury L, Rodrigo C, Leonardi-Bee J, Nguyen-Van-Tam J, Lim WS. Corticosteroids as adjunctive therapy in the treatment of influenza. *Cochrane Database Syst Rev.* 2019;2:Cd010406.
  - Lin JS, Bowles EJA, Williams SB, Morrison CC. Screening for Thyroid Cancer: Updated Evidence Report and Systematic Review for the US Preventive Services Task Force. *Jama.* 2017;317(18):1888-903.
  - Majorin F, Torondel B, Ka Seen Chan G, Clasen T. Interventions to improve disposal of child faeces for preventing diarrhoea and soil-transmitted helminth infection. *Cochrane Database Syst Rev.* 2019;9:Cd011055.
  - Marschall J, Carpenter CR, Fowler S, Trautner BW. Antibiotic prophylaxis for urinary tract infections after removal of urinary catheter: meta-analysis. *Bmj.* 2013;346:f3147.
  - McQuade CN, Mizus M, Wald JW, Goldberg L, Jessup M, Umscheid CA. Brain-Type Natriuretic Peptide and Amino-Terminal Pro-Brain-Type Natriuretic Peptide Discharge Thresholds for Acute Decompensated Heart Failure: A Systematic Review. *Ann Intern Med.* 2017;166(3):180-90.
  - Mhimbira FA, Cuevas LE, Dacombe R, Mkopi A, Sinclair D. Interventions to increase tuberculosis case detection at primary healthcare or community-level services. *Cochrane Database Syst Rev.* 2017;11:Cd011432.
  - Nabi G, Cleves A, Shelley M. Surgical management of localised renal cell carcinoma. *Cochrane Database Syst Rev.* 2010(3):Cd006579.
  - Negrini S, Minozzi S, Bettany-Saltikov J, Chockalingam N, Grivas TB, Kotwicki T, et al. Braces for idiopathic scoliosis in adolescents. *Cochrane Database Syst Rev.* 2015(6):Cd006850.

- O'Connor E, Senger CA, Henninger ML, Coppola E, Gaynes BN. Interventions to Prevent Perinatal Depression: Evidence Report and Systematic Review for the US Preventive Services Task Force. *Jama*. 2019;321(6):588-601.
- Paul S, Saxena A, Terrin N, Viveiros K, Balk EM, Wong JB. Hepatitis B Virus Reactivation and Prophylaxis During Solid Tumor Chemotherapy: A Systematic Review and Meta-analysis. *Ann Intern Med*. 2016;164(1):30-40.
- Plourde G, Pancholy SB, Nolan J, Jolly S, Rao SV, Amhed I, et al. Radiation exposure in relation to the arterial access site used for diagnostic coronary angiography and percutaneous coronary intervention: a systematic review and meta-analysis. *Lancet*. 2015;386(10009):2192-203.
- Poirot E, Skarbinski J, Sinclair D, Kachur SP, Slutsker L, Hwang J. Mass drug administration for malaria. *Cochrane Database Syst Rev*. 2013(12):Cd008846.
- Reynolds A, Mann J, Cummings J, Winter N, Mete E, Te Morenga L. Carbohydrate quality and human health: a series of systematic reviews and meta-analyses. *Lancet*. 2019;393(10170):434-45.
- Rojas-Reyes MX, Granados Rugeles C, Charry-Anzola LP. Oxygen therapy for lower respiratory tract infections in children between 3 months and 15 years of age. *Cochrane Database Syst Rev*. 2014(12):Cd005975.
- Santos JAR, Christoforou A, Trieu K, McKenzie BL, Downs S, Billot L, et al. Iodine fortification of foods and condiments, other than salt, for preventing iodine deficiency disorders. *Cochrane Database Syst Rev*. 2019;2:Cd010734.
- Saule R, Vecchi S, Gowing L. Supervised dosing with a long-acting opioid medication in the management of opioid dependence. *Cochrane Database Syst Rev*. 2017;4:Cd011983.
- Schoot RA, Kremer LC, van de Wetering MD, van Ommen CH. Systemic treatments for the prevention of venous thrombo-embolic events in paediatric cancer patients with tunnelled central venous catheters. *Cochrane Database Syst Rev*. 2013(9):Cd009160.
- Schoot RA, van Dalen EC, van Ommen CH, van de Wetering MD. Antibiotic and other lock treatments for tunnelled central venous catheter-related infections in children with cancer. *Cochrane Database Syst Rev*. 2013(6):Cd008975.
- Singh M, Holmes DR, Dehmer GJ, Lennon RJ, Wharton TP, Kutcher MA, et al. Percutaneous coronary intervention at centers with and without on-site surgery: a meta-analysis. *Jama*. 2011;306(22):2487-94.
- Smith ME, Totten A, Hickam DH, Fu R, Wasson N, Rahman B, et al. Pressure ulcer treatment strategies: a systematic comparative effectiveness review. *Ann Intern Med*. 2013;159(1):39-50.
- Sobieraj DM, Baker WL, Nguyen E, Weeda ER, Coleman CI, White CM, et al. Association of Inhaled Corticosteroids and Long-Acting Muscarinic Antagonists With Asthma Control in Patients With Uncontrolled, Persistent Asthma: A Systematic Review and Meta-analysis. *Jama*. 2018;319(14):1473-84.
- Sobieraj DM, Weeda ER, Nguyen E, Coleman CI, White CM, Lazarus SC, et al. Association of Inhaled Corticosteroids and Long-Acting  $\beta$ -Agonists as Controller and Quick Relief Therapy With Exacerbations and Symptom Control in Persistent Asthma: A Systematic Review and Meta-analysis. *Jama*. 2018;319(14):1485-96.
- Strunz EC, Adhiss DG, Stocks ME, Ogden S, Utzinger J, Freeman MC. Water, sanitation, hygiene, and soil-transmitted helminth infection: a systematic review and meta-analysis. *PLoS Med*. 2014;11(3):e1001620.
- Suthar AB, Ford N, Bachanas PJ, Wong VJ, Rajan JS, Saltzman AK, et al. Towards universal voluntary HIV testing and counselling: a systematic review and meta-analysis of community-based approaches. *PLoS Med*. 2013;10(8):e1001496.
- Swiger KJ, Manalac RJ, Blumenthal RS, Blaha MJ, Martin SS. Statins and cognition: a systematic review and meta-analysis of short- and long-term cognitive effects. *Mayo Clin Proc*. 2013;88(11):1213-21.
- Thaler K, Delivuk M, Chapman A, Gaynes BN, Kaminski A, Gartlehner G. Second-generation antidepressants for seasonal affective disorder. *Cochrane Database Syst Rev*. 2011(12):Cd008591.
- Thangaratinam S, Tan A, Knox E, Kilby MD, Franklyn J, Coomarasamy A. Association between thyroid autoantibodies and miscarriage and preterm birth: meta-analysis of evidence. *Bmj*. 2011;342:d2616.
- Thomas RE, Jefferson T, Lasserson TJ. Influenza vaccination for healthcare workers who care for people aged 60 or older living in long-term care institutions. *Cochrane Database Syst Rev*. 2013(7):Cd005187.
- Thomas RE, Jefferson T, Lasserson TJ. Influenza vaccination for healthcare workers who care for people aged 60 or older living in long-term care institutions. *Cochrane Database Syst Rev*. 2016(6):Cd005187.
- Verbeek JH, Ijaz S, Mischke C, Ruotsalainen JH, Makela E, Neuvonen K, et al. Personal protective equipment for preventing highly infectious diseases due to exposure to contaminated body fluids in healthcare staff. *Cochrane Database Syst Rev*. 2016;4:Cd011621.
- Verbeek JH, Martimo KP, Karppinen J, Kuijer PP, Viikari-Juntura E, Takala EP. Manual material handling advice and assistive devices for preventing and treating back pain in workers. *Cochrane Database Syst Rev*. 2011(6):Cd005958.
- Veroniki AA, Cogo E, Rios P, Straus SE, Finkelstein Y, Kealey R, et al. Comparative safety of anti-epileptic drugs during pregnancy: a systematic review and network meta-analysis of congenital malformations and prenatal outcomes. *BMC Med*. 2017;15(1):95.
- Villar JC, Perez JG, Cortes OL, Riarte A, Pepper M, Marin-Neto JA, et al. Trypanocidal drugs for chronic asymptomatic *Trypanosoma cruzi* infection. *Cochrane Database Syst Rev*. 2014(5):Cd003463.
- Wagner AD, Thomssen C, Haerting J, Unverzagt S. Vascular-endothelial-growth-factor (VEGF) targeting therapies for endocrine refractory or resistant metastatic breast cancer. *Cochrane Database Syst Rev*. 2012(7):Cd008941.
- Waldron C, Nunn J, Mac Giolla Phdraig C, Comiskey C, Guerin S, van Harten MT, et al. Oral hygiene interventions for people with intellectual disabilities. *Cochrane Database Syst Rev*. 2019;5:Cd012628.
- West CP, Dyrbye LN, Erwin PJ, Shanafelt TD. Interventions to prevent and reduce physician burnout: a systematic review and meta-analysis. *Lancet*. 2016;388(10057):2272-81.
- West S, Nolan SJ, Cotton J, Gandhi S, Weston J, Sudan A, et al. Surgery for epilepsy. *Cochrane Database Syst Rev*. 2015(7):Cd010541.
- Wilcox ME, Chong CA, Stanbrook MB, Tricco AC, Wong C, Straus SE. Does this patient have an exudative pleural effusion? The Rational Clinical Examination systematic review. *Jama*. 2014;311(23):2422-31.
- Wong MC, Glennly AM, Tsang BW, Lo EC, Worthington HV, Marinho VC. Topical fluoride as a cause of dental fluorosis in children. *Cochrane Database Syst Rev*. 2010(1):Cd007693.

- Yokoyama Y, Nishimura K, Barnard ND, Takegami M, Watanabe M, Sekikawa A, et al. Vegetarian diets and blood pressure: a meta-analysis. *JAMA Intern Med.* 2014;174(4):577-87.
- Young MK, Cripps AW, Nimmo GR, van Driel ML. Post-exposure passive immunisation for preventing rubella and congenital rubella syndrome. *Cochrane Database Syst Rev.* 2015(9):Cd010586.
- Young MK, Nimmo GR, Cripps AW, Jones MA. Post-exposure passive immunisation for preventing measles. *Cochrane Database Syst Rev.* 2014(4):Cd010056.

**Incomparability between outcomes of BoE: Continuous versus binary, incomplete outcome data (missing effect estimates or confidence intervals) in a BoE-pair without meta-analysis for both BoE; n=17 articles**

- Ferri M, Allara E, Bo A, Gasparrini A, Faggiano F. Media campaigns for the prevention of illicit drug use in young people. *Cochrane Database Syst Rev.* 2013(6):Cd009287.
- Hartmann-Boyce J, McRobbie H, Bullen C, Begh R, Stead LF, Hajek P. Electronic cigarettes for smoking cessation. *Cochrane Database Syst Rev.* 2016;9(9):Cd010216.
- Hooper L, Abdelhamid A, Bunn D, Brown T, Summerbell CD, Skeaff CM. Effects of total fat intake on body weight. *Cochrane Database Syst Rev.* 2015(8):Cd011834.
- Hooper L, Abdelhamid A, Moore HJ, Douthwaite W, Skeaff CM, Summerbell CD. Effect of reducing total fat intake on body weight: systematic review and meta-analysis of randomised controlled trials and cohort studies. *Bmj.* 2012;345:e7666.
- Hutton B, Joseph L, Fergusson D, Mazer CD, Shapiro S, Tinmouth A. Risks of harms using antifibrinolytics in cardiac surgery: systematic review and network meta-analysis of randomised and observational studies. *Bmj.* 2012;345:e5798.
- Maher AR, Maglione M, Bagley S, Suttorp M, Hu JH, Ewing B, et al. Efficacy and comparative effectiveness of atypical antipsychotic medications for off-label uses in adults: a systematic review and meta-analysis. *Jama.* 2011;306(12):1359-69.
- McKnight RF, Adida M, Budge K, Stockton S, Goodwin GM, Geddes JR. Lithium toxicity profile: a systematic review and meta-analysis. *Lancet.* 2012;379(9817):721-8.
- McRobbie H, Bullen C, Hartmann-Boyce J, Hajek P. Electronic cigarettes for smoking cessation and reduction. *Cochrane Database Syst Rev.* 2014(12):Cd010216.
- Mhaskar R, Kumar A, Miladinovic B, Djulbegovic B. Bisphosphonates in multiple myeloma: an updated network meta-analysis. *Cochrane Database Syst Rev.* 2017;12:Cd003188.
- Mhaskar R, Redzepovic J, Wheatley K, Clark OA, Miladinovic B, Glasmacher A, et al. Bisphosphonates in multiple myeloma. *Cochrane Database Syst Rev.* 2010(3):Cd003188.
- Mhaskar R, Redzepovic J, Wheatley K, Clark OA, Miladinovic B, Glasmacher A, et al. Bisphosphonates in multiple myeloma: a network meta-analysis. *Cochrane Database Syst Rev.* 2012(5):Cd003188.
- Paige NM, Miake-Lye IM, Booth MS, Beroes JM, Mardian AS, Dougherty P, et al. Association of Spinal Manipulative Therapy With Clinical Benefit and Harm for Acute Low Back Pain: Systematic Review and Meta-analysis. *Jama.* 2017;317(14):1451-60.
- Pega F, Liu SY, Walter S, Pabayo R, Saith R, Lhachimi SK. Unconditional cash transfers for reducing poverty and vulnerabilities: effect on use of health services and health outcomes in low- and middle-income countries. *Cochrane Database Syst Rev.* 2017;11:Cd011135.
- Shepherd E, Salam RA, Manhas D, Synnes A, Middleton P, Makrides M, et al. Antenatal magnesium sulphate and adverse neonatal outcomes: A systematic review and meta-analysis. *PLoS Med.* 2019;16(12):e1002988.
- Toews I, Lohner S, Kullenberg de Gaudry D, Sommer H, Meerpohl JJ. Association between intake of non-sugar sweeteners and health outcomes: systematic review and meta-analyses of randomised and non-randomised controlled trials and observational studies. *Bmj.* 2019;364:k4718.
- Tricco AC, Ashoor HM, Antony J, Beyene J, Veroniki AA, Isaranuwachai W, et al. Safety, effectiveness, and cost effectiveness of long acting versus intermediate acting insulin for patients with type 1 diabetes: systematic review and network meta-analysis. *Bmj.* 2014;349:g5459.
- Weiss J, Freeman M, Low A, Fu R, Kerfoot A, Paynter R, et al. Benefits and Harms of Intensive Blood Pressure Treatment in Adults Aged 60 Years or Older: A Systematic Review and Meta-analysis. *Ann Intern Med.* 2017;166(6):419-29.

BoE= body of evidence; RCT= randomized controlled trial.

**Table S4: Characteristics of included bodies of evidence from randomized controlled trials**

| Reference/<br>year      | Intervention      | Outcome             | Number<br>of studies | Sampl<br>e size | Case<br>s | Description of<br>population                                                                                                                                               | Age;<br>mean/<br>range<br>(years) | Description of<br>intervention                                                                                                                                                                                                                                                                                                                                                                                                                                                                                      | Description of<br>comparator                                                                                     | Description of<br>outcome | Study design        | Follow-up    |
|-------------------------|-------------------|---------------------|----------------------|-----------------|-----------|----------------------------------------------------------------------------------------------------------------------------------------------------------------------------|-----------------------------------|---------------------------------------------------------------------------------------------------------------------------------------------------------------------------------------------------------------------------------------------------------------------------------------------------------------------------------------------------------------------------------------------------------------------------------------------------------------------------------------------------------------------|------------------------------------------------------------------------------------------------------------------|---------------------------|---------------------|--------------|
| Abou-Setta<br>2011 (74) | Nerve block       | Delirium            | 4                    | 461             | 44        | Mostly elderly population (>65 years) / with: hip fracture / community dwelling or not specified / without: dementia, cognitive deficits                                   | >16                               | Regional anaesthesia, either epidural, fascia iliaca compartment block or 3-in-1 nerve block / continuous or single administration of anesthetics / mostly with: Bupivacaine, partly with: Bupivacaine and Morphine / doses: epidural Bupivacaine 0.125% and Morphine, 4ml of 50ug per ml/h; 3-in-1 nerve block with Bupivacaine 0.5%, 30ml, single administration; fascia iliaca compartment block with 0.25% Bupivacaine 0.3ml/kg (interval not reported) or 0.25mg of 0.3ml/kg 24 hours before and after surgery | Placebo (2x) / IV analgesia with Morphine 0.1mg/kg, single administration (1x) / IV NSAID (1x)                   | Delirium                  | Parallel            | NR           |
| Abou-Setta<br>2011 (74) | Spinal anesthesia | All-cause mortality | 2                    | 99              | 15        | Mostly elderly female population / with: hip fracture (2x), stable CAD (1x)                                                                                                | >65                               | Spinal anesthesia with Bupivacaine 0.5% or Mepivacaine 4% (dose not reported) / spinal anesthesia with Bupivacaine 0.5% 1.6ml incremental dosage or Bupivacaine 0.5% 2.5ml, single administration                                                                                                                                                                                                                                                                                                                   | General anesthesia; with: Fentanyl 1-2ug/kg bolus followed by 25-50ug maintenance dose on demand or not reported | Mortality at 30 days      | Parallel            | NR           |
| Aburto 2013<br>(75)     | Low sodium        | All-cause mortality | 4                    | 3,595           | 69        | Male and female population / mostly healthy, with: normal blood pressure (3x), no use of antihypertensive medication / partly with: moderate overweight, hypertension (1x) | 38.5-58.6 (mean)                  | Dietary and behavioural counselling to reduce sodium intake / with or without: weight loss intervention                                                                                                                                                                                                                                                                                                                                                                                                             | No dietary counselling / recommendations for generally healthy diet                                              | All-cause mortality       | Parallel, factorial | 2-11.5 years |

|                     |                           |                                  |    |        |     |                                                                                                                                                          |                  |                                                                                                                                                           |                                                                                                                                                                                                                                 |                                         |                     |              |
|---------------------|---------------------------|----------------------------------|----|--------|-----|----------------------------------------------------------------------------------------------------------------------------------------------------------|------------------|-----------------------------------------------------------------------------------------------------------------------------------------------------------|---------------------------------------------------------------------------------------------------------------------------------------------------------------------------------------------------------------------------------|-----------------------------------------|---------------------|--------------|
| Aburto 2013 (75)    | Low sodium                | Cardiovascular disease           | 2  | 720    | 93  | Male and female population / health status: hypertensive, taking one or two drugs for hypertension (1x) / otherwise healthy males with hypertension (1x) | 57.1-65.8 (mean) | Dietary counselling to reduce sodium intake                                                                                                               | Unspecific retention procedures (presentations unrelated to the subject of the trial) / no treatment                                                                                                                            | Cardiovascular disease                  | Parallel, factorial | 24-30 months |
| Ahmad 2015 (27)     | Intra-aortic balloon pump | All-cause mortality              | 12 | 2,123  | 361 | Population with acute CVD (MI, complicated MI, cardiogenic shock, cardiac failure)                                                                       | NR               | Intra-aortic balloon pump before or after PCI / mostly co-interventions for all patients: PCI (8/12), thrombolysis (2/12) / no reperfusion therapy (2/12) | No intra-aortic balloon pump, intensive care                                                                                                                                                                                    | Mortality at 30 days                    | Parallel            | NR           |
| Alexander 2017 (76) | DHA and EPA               | Coronary heart disease           | 18 | 47,494 | NR  | Male and female population / primary, mixed or secondary prevention of CVD / mostly in highly developed countries                                        | >18              | Ethyl esters, fish oil, fatty fish or EPA and DHA enriched margarine / EPA+DHA: 0.38-5.04 g/day                                                           | Mostly oils not containing EPA and DHA ( oil, com oil, oleic acid margarine, oil mixture without marine n-3 fatty acids) / partly: no supplements, dietary advice, aluminium hydroxide (1x), gelatin (1x)                       | Any coronary heart disease event        | Parallel, factorial | 0.5-7 years  |
| Alexander 2017 (76) | DHA and EPA               | Coronary heart disease mortality | 14 | 39,537 | NR  | Male and female population / primary, mixed or secondary prevention of CVD / mostly in highly developed countries                                        | >18              | Ethyl esters, fish oil, fatty fish or EPA and DHA enriched margarine / EPA+DHA: 0.38-5.04 g/day                                                           | Mostly oils not containing EPA and DHA ( oil, com oil, oleic acid margarine, sunflower oil, oil mixture without marine n-3 fatty acids) / partly other controls (no supplements, dietary advice, aluminium hydroxide, gelatine) | Fatal coronary heart disease events     | Parallel, factorial | 0.5-7 years  |
| Alexander 2017 (76) | DHA and EPA               | Coronary heart disease incidence | 9  | 33,441 | NR  | Male and female population / primary, mixed or secondary prevention of CVD / mostly in highly developed countries                                        | >18              | Ethyl esters, fish oil, fatty fish / EPA+DHA: 0.6-3.46 g/day                                                                                              | Oils not containing EPA and DHA ( oil, com oil, oleic acid margarine, sunflower oil, oil mixture without marine n-3 fatty acids) / other controls (no supplements, dietary advice, aluminium hydroxide, gelatine)               | Non-fatal coronary heart disease events | Parallel, factorial | 1-7 years    |



|                     |                           |                          |   |       |       |                                                                                                                                                                                                                                                                                          |     |                                      |                                                                                                          |                                                                                                            |          |                                                                       |
|---------------------|---------------------------|--------------------------|---|-------|-------|------------------------------------------------------------------------------------------------------------------------------------------------------------------------------------------------------------------------------------------------------------------------------------------|-----|--------------------------------------|----------------------------------------------------------------------------------------------------------|------------------------------------------------------------------------------------------------------------|----------|-----------------------------------------------------------------------|
| Alipanah 2018 (24)  | Self-administered therapy | Low treatment success    | 4 | 1,603 | 1,151 | Adult population (>15 years) / with: mostly pulmonary, smear positive tuberculosis / excluding or including: multidrug-resistant tuberculosis and patients with history of antituberculosis treatment / setting: Thailand, Pakistan, South Africa                                        | ≥15 | Self-administered therapy            | Directly observed therapy / either observed by health staff in hospital or by community or family member | Low treatment success                                                                                      | Parallel | NR                                                                    |
| Alipanah 2018 (24)  | Self-administered therapy | Low treatment completion | 5 | 1,982 | 406   | Adult population (>15 years) / with: mostly pulmonary, smear positive tuberculosis / excluding or including multidrug-resistant tuberculosis and patients with history of antituberculosis treatment / partly population without: HIV / setting: India, Thailand, Pakistan, South Africa | ≥15 | Self-administered therapy            | Directly observed therapy / either observed by health staff in hospital or by community or family member | Low treatment completion                                                                                   | Parallel | NR                                                                    |
| Alipanah 2018 (24)  | Self-administered therapy | All-cause mortality      | 4 | 1,603 | 67    | Adult population (>15 years) / with: mostly pulmonary, smear positive tuberculosis / excluding or including multidrug-resistant tuberculosis and patients with history of antituberculosis treatment / setting: Thailand, Pakistan, South Africa                                         | ≥15 | Self-administered therapy            | Directly observed therapy / either observed by health staff in hospital or by community or family member | Mortality                                                                                                  | Parallel | NR                                                                    |
| Anglemyer 2013 (77) | Antiretroviral therapy    | HIV infection            | 1 | 3,500 | 39    | Serodiscordant couples (HIV status), mostly heterosexual (≈97%) / CD4 count 350-550 cells/μL / setting: nine countries (Botswana, Brazil, India, Malawi, Kenya, South Africa, Thailand, United States of                                                                                 | ≥18 | Immediate ART (350-550 CD4 cells/μL) | Delayed ART / initiation of treatment when CD4-cells <250 cells/μL or AIDS defining disease              | Incident HIV infection of uninfected partner in serodiscordant couples (virologically linked and unlinked) | Parallel | 1,585 (immediate treatment) to 1,567 (delayed treatment) person-years |

|                   |                                          |                                |   |       |    |                                                                                                                                                                                          |              |                                                                                                                                                                                                                                                         |                              |                                                                                                                                                                                                                                                                                                          |          |                        |
|-------------------|------------------------------------------|--------------------------------|---|-------|----|------------------------------------------------------------------------------------------------------------------------------------------------------------------------------------------|--------------|---------------------------------------------------------------------------------------------------------------------------------------------------------------------------------------------------------------------------------------------------------|------------------------------|----------------------------------------------------------------------------------------------------------------------------------------------------------------------------------------------------------------------------------------------------------------------------------------------------------|----------|------------------------|
|                   |                                          |                                |   |       |    | America, Zimbabwe)                                                                                                                                                                       |              |                                                                                                                                                                                                                                                         |                              |                                                                                                                                                                                                                                                                                                          |          |                        |
| Azad 2017 (21)    | Nonnutritive sweeteners                  | Body Mass Index                | 3 | 242   | NA | Male and female population / with: mild essential hypertension (2x) or overweight (1x) but otherwise healthy (3x) (without: cancer, CVD) / mean BMI: 23-34/ setting: Brazil, China, Iran | 32-52 (mean) | Stevioside capsules daily 3.8-15mg/kg (1x) or 1500mg (1x) / one 250ml diet beverage daily 5 days/week / co-intervention for all patients (1x): bi-weekly dietary and behavioural counseling to increase physical activity (based at weight-loss clinic) | Placebo, water               | BMI change at latest follow-up                                                                                                                                                                                                                                                                           | Parallel | 0.5-2 years (duration) |
| Barnard 2015 (28) | Surgical abortion by mid-level providers | Failure or incomplete abortion | 2 | 2,789 | 24 | Pregnant women / gestational age: <12 weeks / urban and peri-urban areas in South-Africa and Vietnam (two studies at different time and setting with same methodology by same author)    | >18          | Surgical abortion by mid-level providers with government-accredited training in abortion                                                                                                                                                                | Surgical abortion by doctors | Failure or incomplete abortion                                                                                                                                                                                                                                                                           | Parallel | 10-14 days follow-up   |
| Barnard 2015 (28) | Surgical abortion by mid-level providers | Complications                  | 2 | 2,789 | 4  | Pregnant women / gestational age: <12 weeks / urban and peri-urban areas in South-Africa and Vietnam (two studies at different time and setting with same methodology by same author)    | >18          | Surgical abortion by mid-level providers with government-accredited training in abortion                                                                                                                                                                | Surgical abortion by doctors | Immediate complications (excessive bleeding after abortion, cervical injury, confirmed/suspected perforation, adverse drug reaction); Delayed complications (retained POC needing re-evacuation, haematometra, post-abortion pelvic infection, excessive post-abortion bleeding, abortion-related death) | Parallel | 10-14 days follow-up   |

|                                   |                                                |                                       |   |       |     |                                                                                                                                                                                                                 |     |                                                                                                                                                                                                          |                                                                                                                                        |                                                                                                                                                                                                                                                                                                                                                                         |          |                                                 |
|-----------------------------------|------------------------------------------------|---------------------------------------|---|-------|-----|-----------------------------------------------------------------------------------------------------------------------------------------------------------------------------------------------------------------|-----|----------------------------------------------------------------------------------------------------------------------------------------------------------------------------------------------------------|----------------------------------------------------------------------------------------------------------------------------------------|-------------------------------------------------------------------------------------------------------------------------------------------------------------------------------------------------------------------------------------------------------------------------------------------------------------------------------------------------------------------------|----------|-------------------------------------------------|
| Barnard 2015<br>(28)              | Surgical abortion<br>by mid-level<br>providers | Abortion failure<br>and complications | 2 | 2,789 | 28  | Pregnant women /<br>gestational age: <12<br>weeks / urban and peri-<br>urban areas in South-<br>Africa and Vietnam (two<br>studies at different time<br>and setting with same<br>methodology by same<br>author) | >18 | Surgical abortion by mid-level<br>providers with government-<br>accredited training in abortion                                                                                                          | Surgical abortion by<br>doctors                                                                                                        | Immediate<br>complications<br>(excessive<br>bleeding after<br>abortion, cervical<br>injury,<br>confirmed/suspect<br>ed perforation,<br>adverse drug<br>reaction); Delayed<br>complications<br>(retained POC<br>needing re-<br>evacuation,<br>haematometra,<br>post-abortion<br>pelvic infection,<br>excessive post-<br>abortion bleeding,<br>abortion-related<br>death) | Parallel | 10-14 days<br>follow-up                         |
| Bellemain-<br>Appaix 2012<br>(48) | Clopidogrel                                    | All-cause<br>mortality                | 7 | 8,608 | 151 | Adults with CAD/CHD<br>scheduled for<br>catheterisation, PCI, or<br>both / mostly with ACS,<br>partly with definite<br>STEMI, partly with<br>elective PCI                                                       | NR  | Clopidogrel 300-900mg<br>pretreatment before PCI / mostly<br>several hours before procedure<br>(minimum 2 hours to median 10<br>days before procedure (range)) /<br>followed by maintenance dose<br>(3x) | Delayed treatment with<br>Clopidogrel<br>(immediately before,<br>during or after the<br>procedure) with a loading<br>dose of 300-900mg | All-cause<br>mortality                                                                                                                                                                                                                                                                                                                                                  | Parallel | 7 days or<br>hospital<br>discharge to 1<br>year |
| Bellemain-<br>Appaix 2012<br>(48) | Clopidogrel                                    | Major bleeding                        | 7 | 8,608 | 286 | Adults with CAD/CHD<br>scheduled for<br>catheterisation, PCI, or<br>both / mostly with ACS,<br>partly with definite<br>STEMI, partly with<br>elective PCI                                                       | NR  | Clopidogrel 300-900mg<br>pretreatment before PCI / mostly<br>several hours before procedure<br>(minimum 2 hours to median 10<br>days before procedure (range)) /<br>followed by maintenance dose<br>(3x) | Delayed treatment with<br>Clopidogrel<br>(immediately before,<br>during or after the<br>procedure) with a loading<br>dose of 300-900mg | Major bleeding<br>(TIMI<br>major/minor or<br>substantially<br>disabling<br>bleeding,<br>intraocular<br>bleeding leading<br>to the loss of<br>vision, or bleeding<br>necessitating<br>transfusion of 2 or<br>more units of<br>blood (1x))                                                                                                                                | Parallel | 7 days or<br>hospital<br>discharge to 1<br>year |

|                            |                  |                                  |   |       |     |                                                                                                                                         |                  |                                                                                                                                                                                                                                                      |                                                                                                                         |                                                                                                                                                                                                                                                                                           |          |                                        |
|----------------------------|------------------|----------------------------------|---|-------|-----|-----------------------------------------------------------------------------------------------------------------------------------------|------------------|------------------------------------------------------------------------------------------------------------------------------------------------------------------------------------------------------------------------------------------------------|-------------------------------------------------------------------------------------------------------------------------|-------------------------------------------------------------------------------------------------------------------------------------------------------------------------------------------------------------------------------------------------------------------------------------------|----------|----------------------------------------|
| Bellemain-Appaix 2012 (48) | Clopidogrel      | Coronary heart disease           | 7 | 8,608 | 955 | Adults with CAD/CHD scheduled for catheterisation, PCI, or both / mostly with ACS, partly with definite STEMI, partly with elective PCI | NR               | Clopidogrel 300-900mg pretreatment before PCI / mostly several hours before procedure (minimum 2 hours to median 10 days before procedure (range)) / followed by maintenance dose (3x)                                                               | Delayed treatment with Clopidogrel (immediately before, during or after the procedure) with a loading dose of 300-900mg | Major coronary events (CV death, death, MI, periprocedural MI, stroke, urgent target vessel revascularization)                                                                                                                                                                            | Parallel | 7 days or hospital discharge to 1 year |
| Bellemain-Appaix 2014 (47) | P2Y12 inhibitors | All-cause mortality              | 3 | 7,246 | 39  | Adults undergoing PCI / 66.5-100% (range) with: non-ST elevation ACS; non-acute patients only (1x)                                      | 61.5-64.2 (mean) | Clopidogrel with subsequent PCI, 300mg loading dose followed by maintenance dose, mean 2 hours to 10 days before procedure / randomization after coronary angiogram (1x) / Prasugrel 30mg median 4,4 hours before PCI and immediately after PCI (1x) | Placebo instead of pretreatment / delayed treatment with Clopidogrel or Prasugrel                                       | All-cause death; at 7, 28 or 30 days respectively                                                                                                                                                                                                                                         | Parallel | 1-12 months (follow-up)                |
| Bellemain-Appaix 2014 (47) | P2Y12 inhibitors | Major bleeding                   | 3 | 7,547 | 154 | Adults undergoing PCI / 66.5-100% (range) with: non-ST elevation ACS; non-acute patients only (1x)                                      | 61.5-64.2 (mean) | Clopidogrel with subsequent PCI, 300mg loading dose followed by maintenance dose, mean 2 hours to 10 days before procedure / randomization after coronary angiogram (1x) / Prasugrel 30mg median 4,4 hours before PCI and immediately after PCI (1x) | Placebo instead of pretreatment / delayed treatment with Clopidogrel or Prasugrel                                       | Major bleeding; at 7, 28 or 30 days respectively; Bleeding: Thrombolysis in Myocardial Infarction major bleeding criteria (2x) or substantially disabling bleeding, intraocular bleeding leading to loss of vision, or bleeding necessitating transfusion of $\geq 2$ units of blood (1x) | Parallel | 1-12 months (follow-up)                |
| Bellemain-Appaix 2014 (47) | P2Y12 inhibitors | Main composite ischemic endpoint | 3 | 7,246 | 645 | Adults undergoing PCI / 66.5-100% (range) with: non-ST elevation ACS; non-acute patients only (1x)                                      | 61.5-64.2 (mean) | Clopidogrel with subsequent PCI, 300mg loading dose followed by maintenance dose, mean 2 hours to 10 days before procedure / randomization after coronary angiogram (1x) / Prasugrel 30mg median 4,4 hours before PCI and immediately after PCI (1x) | Placebo instead of pretreatment / delayed treatment with Clopidogrel or Prasugrel                                       | Main composite ischemic endpoint; at 7, 28 or 30 days respectively                                                                                                                                                                                                                        | Parallel | 1-12 months (follow-up)                |

|                      |                    |                             |    |         |       |                                                                                                                                                                                                                                               |                  |                                                                                                                                                                                        |                    |                                  |                              |                        |
|----------------------|--------------------|-----------------------------|----|---------|-------|-----------------------------------------------------------------------------------------------------------------------------------------------------------------------------------------------------------------------------------------------|------------------|----------------------------------------------------------------------------------------------------------------------------------------------------------------------------------------|--------------------|----------------------------------|------------------------------|------------------------|
| Bloomfield 2016 (22) | Mediterranean diet | Breast cancer               | 1  | 4,152   | NR    | Female population / without prevalent CVD or other severe conditions but with metabolic or CVD risk factors, without breast cancer / setting: Spain                                                                                           | 67.4-68.1 (mean) | Mediterranean diet / free extra-virgin olive oil or nuts included                                                                                                                      | Low-fat diet       | Breast cancer incidence          | Parallel                     | 4.8 years              |
| Bolland 2015 (49)    | Calcium            | All fractures               | 22 | 68,505  | 6,725 | Mostly general female population, community dwelling / institutionalised population (2x)                                                                                                                                                      | 56-86 (mean)     | Supplements / calcium (8x) only or calcium and vitamin D (13x), calcium and UV-light (1x) / doses: calcium 600 to 1600 mg/day, vitamin D 400 to 1000 IU/day or 300 000 IU IM stat (2x) | Placebo, "control" | All fractures                    | Parallel, factorial, cluster | 1-7 years (duration)   |
| Bolland 2015 (49)    | Calcium            | Vertebral fracture          | 12 | 48,967  | 666   | Mostly general female population, community dwelling / institutionalised population (1x)                                                                                                                                                      | 58-80 (mean)     | Supplements / calcium (8x) or calcium and vitamin D (4x) / doses: calcium 750 to 1600 mg/day, vitamin D 400 to 800 IU/d or 300 000 IU IM stat (1x)                                     | Placebo, "control" | Vertebral fractures              | Parallel, factorial          | 1.5-7 years (duration) |
| Bolland 2015 (49)    | Calcium            | Hip fracture                | 13 | 56,648  | 981   | Mostly general female population, community dwelling / institutionalised population (2x)                                                                                                                                                      | 58-85 (mean)     | Supplements / calcium (4x) or calcium and vitamin D (9x) / doses: calcium 400 to 1200 mg/day, vitamin D 400 to 800 IU/d or 300 000 IU IM stat (1x)                                     | Placebo, "control" | Hip fracture                     | Parallel, factorial          | 1-7 years (duration)   |
| Brenner 2014 (29)    | Sigmoidoscopy      | Colorectal cancer mortality | 4  | 437,600 | NR    | Male and female population / generally healthy (without: pre-existing colorectal cancer, adenomas (2x), other cancer (1x), increased risk for colorectal cancer, other severe or terminal disease (3x)) / setting: highly developed countries | 55-74 (range)    | Flexible sigmoidoscopy / flexible sigmoidoscopy with or without faecal occult blood test (1x) / sigmoidoscopy repeated after 3-5 years (1x)                                            | No sigmoidoscopy   | Mortality from colorectal cancer | Parallel                     | 7-11.9 (median)        |
| Brenner 2014 (29)    | Sigmoidoscopy      | Colorectal cancer incidence | 4  | 437,600 | NR    | Male and female population / generally healthy (without: pre-existing colorectal cancer, adenomas (2x), other cancer (1x), increased risk for colorectal cancer, other severe or terminal                                                     | 55-74 (range)    | Flexible sigmoidoscopy / flexible sigmoidoscopy with or without faecal occult blood test (1x) / sigmoidoscopy repeated after 3-5 years (1x)                                            | No sigmoidoscopy   | Incidence of colorectal cancer   | Parallel                     | 7-11.9 years (median)  |

|                      |                          |                         |    |        |       |                                                                                                                    |               |                                                                                                                                                                                                                                                          |                                                                                                                                                            |                                                                                                                                                                                                                |                                             |                                 |
|----------------------|--------------------------|-------------------------|----|--------|-------|--------------------------------------------------------------------------------------------------------------------|---------------|----------------------------------------------------------------------------------------------------------------------------------------------------------------------------------------------------------------------------------------------------------|------------------------------------------------------------------------------------------------------------------------------------------------------------|----------------------------------------------------------------------------------------------------------------------------------------------------------------------------------------------------------------|---------------------------------------------|---------------------------------|
|                      |                          |                         |    |        |       | disease (3x)) / setting: highly developed countries                                                                |               |                                                                                                                                                                                                                                                          |                                                                                                                                                            |                                                                                                                                                                                                                |                                             |                                 |
| Chowdhury 2012 (78)  | Omega-3                  | Cerebrovascular disease | 2  | 31,181 | 978   | Male and female population / without CVD (2x) or with: risk factors for CVD, metabolic disease (2x)                | 40-75 (range) | EPA 1.8 g/day capsule / EPA+DHA 1 g/day capsule / co-intervention for all patients (1x): Pravastatin 10mg/day or Simvastatin 5mg/day                                                                                                                     | Placebo containing olive oil                                                                                                                               | Cerebrovascular disease                                                                                                                                                                                        | Parallel                                    | 4.6-6.23 years follow-up (mean) |
| Chowdhury 2014a (79) | $\alpha$ -linolenic acid | Coronary heart disease  | 4  | 18,866 | 419   | Male (2x) or male and female (2x) population / with CVD (3x) or healthy (1x) / setting: highly developed countries | 40-80 (range) | $\alpha$ -linolenic acid / supplements or dietary oils / 2-5.5 g/day                                                                                                                                                                                     | General dietary advice / sunflower oil / EPA+DHA / margarine                                                                                               | Cardiovascular disease (non-fatal myocardial infarction, fatal myocardial infarction, fatal coronary heart event, sudden cardiac death, heart failure, fatal coronary heart disease)                           | Parallel                                    | 1-3.4 years                     |
| Chowdhury 2014a (79) | Omega-3                  | Coronary heart disease  | 17 | 76,580 | 4,974 | Male and female population / with: CVD or high risk for CVD / setting: highly developed countries                  | 18-80 (range) | Supplements (capsules) of polyunsaturated fatty acids / partly margarine (1x) / 0.3-6 g/day                                                                                                                                                              | Placebo / unspecified or other fatty food (sunflower oil, olive oil, corn oil, non-marine fatty-acids, margarine or ALA) / Pravastatin or Simvastatin (1x) | Fatal and non-fatal coronary events (non-fatal myocardial infarction, fatal myocardial infarction, revascularisation, fatal coronary heart disease, non-fatal coronary heart disease, acute coronary syndrome) | Parallel, factorial                         | 0.1- 6.2 years                  |
| Chowdhury 2014a (79) | Omega-6                  | Coronary heart disease  | 8  | 14,476 | 974   | Male (6x) or mixed population (2x) / with: CVD or high risk for CVD / setting: highly developed countries          | 30-88 (range) | Diet rich of linolenic acid / mixed polyunsaturated fatty acids principally consisting of linolenic acid (6x), linolenic acid-specific supplementation (2x) / linolenic acid intake of total daily fat 8-72% or 40,5-85g/day polyunsaturated fatty acids | Mostly unspecific dietary advice / partly low linolenic acid diet, low linoleic acid diet with high proportion of other fats                               | Fatal and non-fatal coronary events (revascularisation, non fatal MI, fatal MI, fatal coronary heart event, sudden cardiac death)                                                                              | Parallel, cross-over cluster RCT, factorial | 1-8 years                       |

|                      |                   |                          |    |        |       |                                                                                                                                                                                                 |                                    |                                                                                                                                                                          |                                                                                                                   |                                                              |                              |                                    |
|----------------------|-------------------|--------------------------|----|--------|-------|-------------------------------------------------------------------------------------------------------------------------------------------------------------------------------------------------|------------------------------------|--------------------------------------------------------------------------------------------------------------------------------------------------------------------------|-------------------------------------------------------------------------------------------------------------------|--------------------------------------------------------------|------------------------------|------------------------------------|
| Chowdhury 2014b (80) | Vitamin D         | All-cause mortality      | 22 | 30,716 | 5,114 | Population with or without pre-existing chronic disease (CVD, metabolic disease, cancer) / community dwelling or institutionalised / setting: mostly Europe, partly North America, Asia-pacific | 56-85 (mean)                       | Mostly oral vitamin D2 or D3 supplementation / partly injections / dose: vitamin D3: 10-6,000 IU/day, vitamin D2: 208-4,500 IU/day                                       | Mostly placebo / partly no treatment                                                                              | All-cause mortality                                          | Parallel, cluster, factorial | 0.38 to 6.8 years (mean follow-up) |
| Chung 2011 (58)      | Vitamin D         | Colorectal cancer        | 1  | 2,686  | NR    | Elderly general population / men (76%) and women / community dwelling                                                                                                                           | 75 (mean)/ 65-85 (range)           | Vitamin D3 oral supplements / 100,000 IU/4 months                                                                                                                        | Placebo                                                                                                           | Colorectal cancer                                            | Parallel                     | 5 years (follow-up & duration)     |
| Chung 2011 (58)      | Vitamin D         | Breast cancer            | 1  | 2,686  | NR    | Elderly general population, women (for outcome breast cancer) / community dwelling                                                                                                              | 75 (mean)/ 65-85 (range)           | Vitamin D3 oral supplements / 100,000 IU/4 months                                                                                                                        | Placebo                                                                                                           | Breast cancer                                                | Parallel                     | 5 years (follow-up & duration)     |
| Chung 2016 (56)      | Calcium           | Cardiovascular mortality | 2  | 4,103  | 246   | Male and female elderly population / general population or population with fracture / setting: England, Scotland and Australia                                                                  | 77 (mean)/ >70                     | Calcium supplements / 1,000mg elemental calcium or 1,200 mg calcium carbonate daily for 24 months to 5 years                                                             | Placebo                                                                                                           | Cardiovascular disease deaths, ischemic heart disease deaths | Parallel, factorial          | 3-9.5 years                        |
| Ding 2017 (81)       | Dairy             | Systolic blood pressure  | 8  | 735    | NR    | Male and female general population / partly: healthy or with CVD, metabolic disease, overweight                                                                                                 | 50-57 (mean for 2x)/ 20-85 (range) | Diet rich of dairy products / 3-5 servings/day (low fat milk, low-fat yogurt, unspecified dairy products daily) / free low-fat dairy products (home delivery or coupons) | Low-dairy diet / non-dairy dietary intervention / diet as usual                                                   | Systolic blood pressure mmHg, end of trial                   | Parallel, cross-over         | 1-12 months study duration         |
| Fenton 2018 (30)     | Radiation therapy | Erectile dysfunction     | 1  | 884    | 336   | Male population with localised prostate cancer                                                                                                                                                  | 49-69 (range)                      | Radiation therapy                                                                                                                                                        | Conservative management, including regular PSA screening, subsequent radical or palliative treatments if required | Erectile dysfunction (perceived as troublesome by patients)  | Parallel                     | 6 years                            |

|                        |                            |                                                            |   |       |     |                                                                                                                                                                                                                |                                      |                                                                                                                                                                                                                                                                                                                                                                                                                       |                                                                                                                                                                                                                                                                                                                                                                                                 |                                                                                                                                                                       |          |                         |
|------------------------|----------------------------|------------------------------------------------------------|---|-------|-----|----------------------------------------------------------------------------------------------------------------------------------------------------------------------------------------------------------------|--------------------------------------|-----------------------------------------------------------------------------------------------------------------------------------------------------------------------------------------------------------------------------------------------------------------------------------------------------------------------------------------------------------------------------------------------------------------------|-------------------------------------------------------------------------------------------------------------------------------------------------------------------------------------------------------------------------------------------------------------------------------------------------------------------------------------------------------------------------------------------------|-----------------------------------------------------------------------------------------------------------------------------------------------------------------------|----------|-------------------------|
| Fenton 2018<br>(30)    | Radical<br>Prostatectomy   | Urinary<br>incontinence                                    | 3 | 1,796 | 296 | Male population with<br>localised prostate cancer                                                                                                                                                              | 40-75<br>(range)                     | Radical prostatectomy                                                                                                                                                                                                                                                                                                                                                                                                 | Conservative<br>management /<br>surveillance including<br>regular PSA screening,<br>subsequent radical or<br>palliative treatments if<br>required (1x) / palliative<br>treatment including<br>hormon therapy,<br>transurethral resection of<br>the prostate and other<br>options (1x) / observation,<br>offered transurethral<br>resection of the prostate<br>in case of local progress<br>(1x) | Urinary<br>incontinence<br>(defined by<br>regular use of<br>pads or as<br>perceived<br>troublesome by<br>patients)                                                    | Parallel | 2-8 years               |
| Fenton 2018<br>(30)    | Radical<br>Prostatectomy   | Erectile<br>dysfunction                                    | 3 | 1,777 | 955 | Male population with<br>localised prostate cancer                                                                                                                                                              | 40-75<br>(range)                     | Radical prostatectomy                                                                                                                                                                                                                                                                                                                                                                                                 | Conservative<br>management /<br>surveillance including<br>regular PSA screening,<br>subsequent radical or<br>palliative treatments if<br>required (1x) / palliative<br>treatment including<br>hormon therapy,<br>transurethral resection of<br>the prostate and other<br>options (1x) / observation,<br>offered transurethral<br>resection of the prostate<br>in case of local progress<br>(1x) | Erectile<br>dysfunction<br>(perceived as<br>troublesome by<br>patients)                                                                                               | Parallel | 2-8 years               |
| Filippini 2017<br>(43) | Disease-modifying<br>drugs | Conversion to<br>clinically definite<br>multiple sclerosis | 7 | 3,386 | NR  | Female (>64%) and male<br>population / with: first<br>attack suggestive of<br>multiple sclerosis (and<br>mostly with at least two<br>silent lesions in MRI) /<br>setting: mostly highly<br>developed countries | 28-33<br>(mean)/<br>18-55<br>(range) | Different disease modifying<br>drugs (Interferon beta-1b SC or<br>IM (3x), Cladribine P.O. (1x),<br>Glatiramer acetate SC (1x),<br>Teriflunomide P.O. (1x)) / mostly<br>treatment with corticosteroids if<br>relapse (+/- Acetaminophen) /<br>partly co-intervention with<br>Acetaminophen after injection /<br>all patients: open-label treatment<br>with study drug if conversion to<br>definite multiple sclerosis | Placebo (SC, IM, P.O.)                                                                                                                                                                                                                                                                                                                                                                          | Clinically definite<br>multiple sclerosis<br>(defined by<br>clinical<br>assessment,<br>EDSS-score,<br>Poser criteria,<br>confirmed by a<br>central committee<br>(1x)) | Parallel | 18 months to 3<br>years |



|                    |                                           |                                |   |       |     |                                                                                                                                                                                                                                           |                |                                                                                                                                 |                                                          |                             |          |                |
|--------------------|-------------------------------------------|--------------------------------|---|-------|-----|-------------------------------------------------------------------------------------------------------------------------------------------------------------------------------------------------------------------------------------------|----------------|---------------------------------------------------------------------------------------------------------------------------------|----------------------------------------------------------|-----------------------------|----------|----------------|
| Fluri 2010 (31)    | Extracranial-intracranial arterial bypass | All-cause mortality            | 2 | 1,691 | 281 | Population with occlusive carotid artery disease / with haemodynamic compromise only (1x) or all patients with occlusion of the carotid artery irrespective of their cerebral haemodynamics (1x)                                          | NR             | Extracranial-intracranial arterial bypass plus medical treatment                                                                | Best medical treatment/ Aspirin, 325mg 4x/day or NR (1x) | All-cause death             | Parallel | 25-55.8 months |
| Fluri 2010 (31)    | Extracranial-intracranial arterial bypass | Stroke                         | 2 | 1,691 | 442 | Population with occlusive carotid artery disease / with haemodynamic compromise only (1x) or all patients with occlusion of the carotid artery irrespective of their cerebral haemodynamics (1x)                                          | NR             | Extracranial-intracranial arterial bypass plus medical treatment                                                                | Best medical treatment/ Aspirin, 325mg 4x/day or NR (1x) | Any stroke                  | Parallel | 25-55.8 months |
| Fluri 2010 (31)    | Extracranial-intracranial arterial bypass | Stroke mortality or dependency | 1 | 1,377 | 338 | Population with occlusion of the carotid artery irrespective of their cerebral haemodynamics                                                                                                                                              | NR             | Extracranial-intracranial arterial bypass plus medical treatment                                                                | Aspirin, 325mg 4x/day                                    | Death or dependency         | Parallel | 55.8 months    |
| Gargiulo 2016 (32) | Transcatheter aortic valve                | Early all-cause mortality      | 5 | 3,822 | 153 | Male and female population with severe CVD / including patients at high surgical risk (3x) or only low to intermediate risk patients (2x) / partly with additional diseases (metabolic disease, severe kidney disease, pulmonary disease) | 79-84.5 (mean) | Transcatheter aortic valve replacement / transfemoral access (primary choice), transapically only (1x) / first generation valve | Surgical aortic valve replacement                        | Early all-cause mortality   | Parallel | <2-5 years     |
| Gargiulo 2016 (32) | Transcatheter aortic valve                | Mid-term all-cause mortality   | 5 | 3,822 | 563 | Male and female population, mostly with severe CVD / including patients at high surgical risk (3x) or only low to intermediate risk patients (2x) / partly with additional diseases (metabolic disease, kidney disease,                   | 79-84.5 (mean) | Transcatheter aortic valve replacement / transfemoral access (primary choice), transapically only (1x) / first generation valve | Surgical aortic valve replacement                        | Midterm all-cause mortality | Parallel | <2-5 years     |

|                       |                                        |                               |   |       |       |                                                                                                                                                                                                                                                                                                                                                       |                  |                                                                                                                                                                                                                   |                                   |                              |          |           |
|-----------------------|----------------------------------------|-------------------------------|---|-------|-------|-------------------------------------------------------------------------------------------------------------------------------------------------------------------------------------------------------------------------------------------------------------------------------------------------------------------------------------------------------|------------------|-------------------------------------------------------------------------------------------------------------------------------------------------------------------------------------------------------------------|-----------------------------------|------------------------------|----------|-----------|
|                       |                                        |                               |   |       |       | pulmonary disease)                                                                                                                                                                                                                                                                                                                                    |                  |                                                                                                                                                                                                                   |                                   |                              |          |           |
| Gargiulo 2016<br>(32) | Transcatheter aortic valve             | Long-term all-cause mortality | 4 | 3,755 | 1.044 | Male and female population, mostly with severe CVD / including patients at high surgical risk (2x) or only low to intermediate risk patients (2x) / partly with additional diseases (metabolic disease, kidney disease, pulmonary disease)                                                                                                            | 79-84.5 (mean)   | Transcatheter aortic valve replacement / mostly by femoral access / first generation valve                                                                                                                        | Surgical aortic valve replacement | Longterm all-cause mortality | Parallel | 2-5 years |
| Hartling 2013<br>(50) | Treating gestational diabetes mellitus | High birth weight             | 5 | 2,643 | 341   | Pregnant women / mostly with mild or borderline GDM, partly with manifest GDM / blood glucose (unclear if fasting) 4.68-10.0mmol/L / ethnicity: asian, black, hispanic, white, caucasian / without: severe glucose impairment, CVD, rheumatoid disease, renal disease, active chronic diseases, pregnancy with risk factors (e.g. multiple gestation) | 26.3-31.1 (mean) | Dietary counselling to maintain an euglycemic diet (3 meals and 2-3 snacks; 40-55% carbohydrates), dietary therapy, e.g. caloric restriction / blood glucose monitoring and insulin administration if needed (5x) | Standard obstetric care           | Birth weight >4000g          | Parallel | NR        |

|                     |                                        |                                   |    |       |     |                                                                                                                                                                                                                                                                                                                              |                                |                                                                                                                                                                                                                                                                      |                                           |                                   |          |    |
|---------------------|----------------------------------------|-----------------------------------|----|-------|-----|------------------------------------------------------------------------------------------------------------------------------------------------------------------------------------------------------------------------------------------------------------------------------------------------------------------------------|--------------------------------|----------------------------------------------------------------------------------------------------------------------------------------------------------------------------------------------------------------------------------------------------------------------|-------------------------------------------|-----------------------------------|----------|----|
| Hartling 2013 (50)  | Treating gestational diabetes mellitus | Large-for-gestational age neonate | 3  | 2,261 | 313 | Pregnant women / borderline or mild GDM / fasting blood glucose 4.68-4.8mmol/L, BMI: 23.0-30.2 / ethnicity: asian, black, hispanic, caucasian, white / without: severe GDM, complicated gestation (e.g. fetal anomaly, likely preterm delivery), or other conditions posing a risk to the pregnancy, multiple gestation (1x) | 28.9-31.1 (mean)               | Dietary counseling, formal diet / blood glucose monitoring and insulin if needed (3x)                                                                                                                                                                                | Standard obstetric care                   | Large-for-gestational age neonate | Parallel | NR |
| Hartling 2013 (50)  | Treating gestational diabetes mellitus | Shoulder dystocia                 | 3  | 2,044 | 51  | Pregnant women / borderline or mild GDM / fasting blood glucose 4.8mmol/L (or NR), BMI: 26.0-30.2 / ethnicity: asian, black, hispanic, white; without: severe GDM, complicated gestation (e.g. fetal anomaly, likely preterm delivery), or other conditions posing a risk to the pregnancy; without multiple gestation (1x)  | 26.3-30.9 (mean)               | Dietary counseling, dietary therapy / blood glucose monitoring and insulin if needed (3x)                                                                                                                                                                            | Standard obstetric care                   | Shoulder dystocia                 | Parallel | NR |
| Henderson 2019 (51) | Treating asymptomatic bacteriuria      | Pyelonephritis                    | 12 | 2,068 | 269 | Pregnant women with asymptomatic bacteriuria / 16 to 32 weeks of gestation (range) or NR (4x) / exclusion criteria sparsely reported; (without: hypertension, renal disease, recent urinary tract infection; low risk pregnancies only (1x)) / setting: mostly highly developed countries (11x)                              | 25.1-29 (mean) / 10-40 (range) | Treating asymptomatic bacteriuria ( $\geq 10^5$ colony forming units/ml of the same organism in 1-3 tests) / antibiotics: mostly sulfonamides (sulfamethizole, sulfadimethoxine, others), mostly with high doses used (most studies conducted between 1960-70 (10x)) | No treatment for asymptomatic bacteriuria | Pyelonephritis                    | Parallel | NR |

|                      |                             |                     |   |        |     |                                                                                                                                                                                                                                                                                          |                                       |                                                                                                                                    |                                                                                                |             |                     |                                                                                |
|----------------------|-----------------------------|---------------------|---|--------|-----|------------------------------------------------------------------------------------------------------------------------------------------------------------------------------------------------------------------------------------------------------------------------------------------|---------------------------------------|------------------------------------------------------------------------------------------------------------------------------------|------------------------------------------------------------------------------------------------|-------------|---------------------|--------------------------------------------------------------------------------|
| Higgins 2016<br>(25) | Bacillus Calmette-Guérin    | All-cause mortality | 3 | 3,057  | 199 | Infants / low birth weight (2x) / without: DTP and measles vaccination, malformations or tuberculosis (1x) / setting: native americans in Canada; Guinea-Bissau; participants of factorial RCT with additional randomisation of Vitamin A and placebo (1x)                               | Infants; after birth or not specified | BCG vaccination / SC or not specified                                                                                              | No BCG vaccination (1x), delayed BCG vaccination (2x)                                          | Mortality   | Parallel, factorial | <1 year to 5 years                                                             |
| Higgins 2016<br>(25) | Measles containing vaccines | All-cause mortality | 4 | 17,190 | 169 | Infants or infants and children (1x) / sparse information about health status / with or without prior DTP vaccination; BCG vaccination status not specified / setting: Guinea-Bissau, Nigeria; participants of factorial RCT with additional randomisation of Vitamin A and placebo (1x) | 4.5 months to 2 years (range)         | Measles containing vaccine / one or two doses / at 4.5, 6 or 9 months / vaccine: monovalent, strains: Edmonston, Schwarz, Enders B | Delayed measles containing vaccine (1x) / polio vaccine (2x) / pertussis/tetanus vaccines (1x) | Mortality   | Parallel, factorial | <1.5 years to <5 years/ for analysis: 9 months (reported in systematic review) |
| Hopley 2010<br>(33)  | Total hip arthroplasty      | Reoperation         | 4 | 421    | 27  | Mostly female population / with: displaced femoral neck fracture / ambulatory and oriented patients (2x) or patients with considerable cognitive impairment (2x) (minimal-status-test 10/ SPMSQ-score 9)                                                                                 | 74-82 (mean)                          | Total hip arthroplasty, cemented (3x) / cemented or uncemented (1x)                                                                | Bipolar cemented hemiarthroplasty (3x) / uni- or bipolar and cemented or uncemented (1x)       | Reoperation | Parallel            | 1-3.33 years                                                                   |
| Hopley 2010<br>(33)  | Total hip arthroplasty      | Dislocation         | 4 | 421    | 10  | Mostly female population / with: displaced femoral neck fracture / ambulatory and oriented patients (2x) or patients with considerable cognitive impairment (2x) (minimal-status-test 10/ SPMSQ-score 9)                                                                                 | 74-82 (mean)                          | Total hip arthroplasty, cemented (3x) / cemented or uncemented (1x)                                                                | Bipolar cemented hemiarthroplasty (3x) / uni- or bipolar and cemented or uncemented (1x)       | Dislocation | Parallel            | 1-3.33 years                                                                   |

|                     |                                                      |                        |   |       |     |                                                                                                                                                                                                                 |              |                                                                                                                                                                                                            |                                                                                                  |                                                                                                                                                       |          |                                       |
|---------------------|------------------------------------------------------|------------------------|---|-------|-----|-----------------------------------------------------------------------------------------------------------------------------------------------------------------------------------------------------------------|--------------|------------------------------------------------------------------------------------------------------------------------------------------------------------------------------------------------------------|--------------------------------------------------------------------------------------------------|-------------------------------------------------------------------------------------------------------------------------------------------------------|----------|---------------------------------------|
| Hopley 2010 (33)    | Total hip arthroplasty                               | Deep infection         | 4 | 421   | 17  | Mostly female population / with: displaced femoral neck fracture / ambulatory and oriented patients (2x) or patients with considerable cognitive impairment (2x) (mini-mental-status-test 10/ SPMSQ-score 9)    | 74-82 (mean) | Total hip arthroplasty, cemented (3x) / cemented or uncemented (1x)                                                                                                                                        | Bipolar cemented hemiarthroplasty (3x) / uni- or bipolar and cemented or uncemented (1x)         | Deep infections                                                                                                                                       | Parallel | 1-3.33 years                          |
| Hüpfli 2010 (67)    | Chest-compression-only cardiopulmonary resuscitation | All-cause mortality    | 3 | 3,031 | 389 | Population with out-of-hospital cardiac arrest                                                                                                                                                                  | NR           | Instructions for chest-compression-only bystander cardiopulmonary resuscitation                                                                                                                            | Instructions for standard bystander cardiopulmonary resuscitation (including rescue ventilation) | All-cause mortality                                                                                                                                   | Parallel | Hospital discharge to 30 days (range) |
| Jamal 2013 (82)     | Non-calcium-based phosphat binders                   | All-cause mortality    | 8 | 4,340 | 936 | Male and female population / with: advanced chronic kidney disease, mostly requiring haemodialysis (7x) / without: gastrointestinal disease (4x), cancer (2x), diabetes or uncontrolled diabetes (4x), CVD (4x) | 47-60 (mean) | Non-calcium-based phosphat binders (Sevelamer or Lanthanum) / Atorvastatin for intervention and control group (1x)                                                                                         | Calcium-based phosphat binders (calcium acetate or calcium carbonat)                             | All-cause mortality                                                                                                                                   | Parallel | 5 to >44 months                       |
| Jefferson 2010 (46) | Parenteral influenza vaccine                         | Influenza-like illness | 4 | 6,894 | 346 | Elderly population / community-dwelling generally healthy (2x) or healthy elderly in a retirement community (1x) patients in a psychiatric hospital (1x) / setting: Europe and USA                              | >52/ NR (1x) | Parenteral influenza vaccines / monovalent or trivalent, live attenuated or inactivated / matching the circulating strains during outbreak / pneumococcal vaccines for intervention and control group (1x) | Placebo / influenza B vaccine, placebo or no vaccine (1x)                                        | Influenza like illness, clinically defined (e.g. sudden onset of fever, cough, prostration, weakness, myalgia, widespread aches, headache or myalgia) | Parallel | 3-6 months                            |

|                     |                                |                        |   |        |       |                                                                                                                                                                                                                                                                   |                                           |                                                                                                                                                                                            |                                                 |                                                                                                                                                                           |                                                         |                        |
|---------------------|--------------------------------|------------------------|---|--------|-------|-------------------------------------------------------------------------------------------------------------------------------------------------------------------------------------------------------------------------------------------------------------------|-------------------------------------------|--------------------------------------------------------------------------------------------------------------------------------------------------------------------------------------------|-------------------------------------------------|---------------------------------------------------------------------------------------------------------------------------------------------------------------------------|---------------------------------------------------------|------------------------|
| Jefferson 2010 (46) | Parenteral influenza vaccine   | Influenza              | 3 | 2,217  | 89    | Elderly population / health status: generally healthy community-dwellers (1x), institutionalised population in a psychiatric hospital (1x) or nursing home residents (1x) / without: severe illness or immunocompromised (1x) / setting: Russia, USA, Netherlands | 73 (median) / >60/41-95 (range) / NR (1x) | Parenteral influenza vaccine / monovalent or trivalent, live attenuated or inactivated / vaccine strains matching the circulating strains during outbreak, partly not during outbreak (1x) | Placebo                                         | Laboratory confirmed influenza                                                                                                                                            | Parallel                                                | 1-6 months             |
| Jefferson 2012 (34) | Inactivated influenza vaccines | Influenza              | 5 | 1,628  | 252   | Male and female children and adolescents / known to be healthy (2x) or health status NR                                                                                                                                                                           | <3-18 (range)                             | Inactivated influenza vaccines / 1-2 doses, bi- or trivalent / intranasally, IM / (RCTs conducted 1990-2003)                                                                               | Placebo                                         | Culture confirmed influenza (3x), clinical illness assessed by examination (1x), confirmed by subsequent illness of household member, illness in the epidemic period (1x) | Parallel, cluster-RCT (randomization by family)         | 4-6 months/ NR (4x)    |
| Jefferson 2012 (34) | Inactivated influenza vaccines | Influenza-like illness | 5 | 19,388 | 4,996 | Healthy male and female children and adolescents / partly without: previous hypersensitivity reactions                                                                                                                                                            | <3-18 (range)                             | Inactivated influenza vaccines / 1-2 doses, bi- or trivalent / intranasally, IM, SC / (RCTs conducted 1990-2001)                                                                           | Placebo / no treatment (1x)                     | Influenza-like illness (clinically defined)                                                                                                                               | Parallel, cluster-RCT (clusters: family, school, class) | <5 months              |
| Jin 2012 (83)       | Total flavonoids               | Colorectal neoplasms   | 1 | 929    | 358   | Male and female population with colorectal adenoma / without: other gastrointestinal diseases, severe overweight / setting: USA                                                                                                                                   | >35                                       | Diet with low fat and high amount of fibre, fruit and vegetables                                                                                                                           | Control diet (as usual)                         | Colorectal adenoma recurrence                                                                                                                                             | Parallel                                                | NR                     |
| Johnston 2019 (23)  | Low red meat                   | All-cause mortality    | 1 | 48,835 | NR    | Female postmenopausal population / with: overweight or obesity (>70%), hypertension (30-40%) / without: cancer, type-1 diabetes, infaust disease                                                                                                                  | 50-79 (range)                             | Behavioral support to achieve diet with low fat and high amount of vegetables, fruit and grain                                                                                             | General dietary advice by educational materials | All-cause mortality                                                                                                                                                       | Parallel                                                | <17.05 years follow-up |

|                     |                   |                          |   |        |    |                                                                                                                                                                                                                                                                                                               |                     |                                                                                                     |                                                                                                               |                          |          |                        |
|---------------------|-------------------|--------------------------|---|--------|----|---------------------------------------------------------------------------------------------------------------------------------------------------------------------------------------------------------------------------------------------------------------------------------------------------------------|---------------------|-----------------------------------------------------------------------------------------------------|---------------------------------------------------------------------------------------------------------------|--------------------------|----------|------------------------|
| Johnston 2019 (23)  | Low red meat      | Cardiovascular mortality | 1 | 48,835 | NR | Female postmenopausal population / with: overweight or obesity (>70%), hypertension (30-40%) / without: cancer, type-1 diabetes, infaust disease                                                                                                                                                              | 50-79 (range)       | Behavioral support to achieve diet with low fat and high amount of vegetables, fruit and grain      | General dietary advice by educational materials                                                               | Cardiovascular mortality | Parallel | < 13.8 years follow-up |
| Johnston 2019 (23)  | Low red meat      | Cardiovascular disease   | 1 | 48,835 | NR | Female postmenopausal population / with: overweight or obesity (>70%), hypertension (30-40%) / without: cancer, type-1 diabetes, infaust disease                                                                                                                                                              | 50-79 (range)       | Behavioral support to achieve diet with low fat and high amount of vegetables, fruit and grain      | General dietary advice by educational materials                                                               | Cardiovascular disease   | Parallel | < 13.8 years follow-up |
| Kansagara 2013 (52) | Transfusion       | All-cause mortality      | 6 | 1,757  | NR | Male and female population / with: anemia, mostly with cardiovascular disease (4x) / population in non-operative setting with CHD (3x) or undergoing orthopaedic (2x) or major vascular surgery (1x) / setting: USA and Canada                                                                                | 64-83.3 (mean)      | Liberal transfusion protocols with transfusions starting at haemoglobin values $\leq 10\text{g/dL}$ | More restrictive transfusion protocols with transfusions starting at haemoglobin values $\leq 7-9\text{g/dL}$ | Mortality at 30 days     | Parallel | >30 days               |
| Keag 2018 (84)      | Caesarean section | Urinary incontinence     | 1 | 2,088  | NR | Pregnant women, general population / singleton living fetus in breech presentation, 50% primipara (with or without prior vaginal delivery) / without further contraindication to vaginal delivery (e.g. fetal weight >4 kg, feto-pelvic dysproportion, placenta previa) / setting: highly developed countries | $\approx 30\% > 30$ | Caesarean section (planned)                                                                         | Trial of vaginal delivery, assisted by experienced clinician (followed by caesarean section if unsuccessful)  | Urinary incontinence     | Parallel | 2 years                |

|                 |                                                 |                     |   |       |     |                                                                                                                                                                                                                                                                                                               |                    |                                                                                                                                                                                                               |                                                                                                              |                                |             |                              |
|-----------------|-------------------------------------------------|---------------------|---|-------|-----|---------------------------------------------------------------------------------------------------------------------------------------------------------------------------------------------------------------------------------------------------------------------------------------------------------------|--------------------|---------------------------------------------------------------------------------------------------------------------------------------------------------------------------------------------------------------|--------------------------------------------------------------------------------------------------------------|--------------------------------|-------------|------------------------------|
| Keag 2018 (84)  | Caesarean section                               | Fecal incontinence  | 1 | 2,088 | NR  | Pregnant women, general population / singleton living fetus in breech presentation, 50% primipara (with or without prior vaginal delivery) / without further contraindication to vaginal delivery (e.g. fetal weight >4 kg, feto-pelvic disproportion, placenta previa) / setting: highly developed countries | ≈30% > 30          | Caesarean section (planned)                                                                                                                                                                                   | Trial of vaginal delivery, assisted by experienced clinician (followed by caesarean section if unsuccessful) | Fecal incontinence             | Parallel    | 2 years                      |
| Kredo 2014 (85) | Starting and maintaining antiretroviral therapy | All-cause mortality | 1 | 2,770 | 523 | Male and female adult population (study cohort I of Fairall 2012) / either eligible for ART (HIV infection with CD4 ≤200 cells/μL) or likely to become eligible for ART (with CD4 201–350 cells/μL), 32-52% WHO stage I (asymptomatic) / setting: rural and periurban South Africa                            | 35-36 (mean) / >16 | ART task-shifting from doctors to nurses / ART initiation and maintenance by nurses and referral to doctors in complicated cases (e.g. very low CD4, pregnant, previous ART) / including various ART regimens | ART initiation and re-prescription by doctors with concomitant care by nurse                                 | Death at 12 months             | Cluster-RCT | 1-1.5 years duration (range) |
| Kredo 2014 (85) | Starting and maintaining antiretroviral therapy | Attrition           | 1 | 2,770 | 180 | Male and female adult population (study cohort I of Fairall 2012) / either eligible for ART (HIV infection with CD4 ≤200 cells/μL) or likely to become eligible for ART (with CD4 201–350 cells/μL), 32-52% WHO stage I (asymptomatic) / setting: rural and periurban South Africa                            | 35-36 (mean) / >16 | ART task-shifting from doctors to nurses / ART initiation and maintenance by nurses and referral to doctors in complicated cases (e.g. very low CD4, pregnant, previous ART) / including various ART regimens | ART initiation and re-prescription by doctors with concomitant care by nurse                                 | Lost to follow-up at 12 months | Cluster-RCT | 1-1.5 years duration (range) |



|                 |                                    |                     |    |        |    |                                                                                                                                                                                                                                                                                                                                                               |                      |                                                                                                                                                       |                                                                                                             |                    |                       |                                                         |
|-----------------|------------------------------------|---------------------|----|--------|----|---------------------------------------------------------------------------------------------------------------------------------------------------------------------------------------------------------------------------------------------------------------------------------------------------------------------------------------------------------------|----------------------|-------------------------------------------------------------------------------------------------------------------------------------------------------|-------------------------------------------------------------------------------------------------------------|--------------------|-----------------------|---------------------------------------------------------|
| Kredo 2014 (85) | Maintaining antiretroviral therapy | All-cause mortality | 2  | 4,332  | 94 | Male and female adult population / (study cohort II of Fairall 2012) receiving ART for 6 months, 78-79% viral load <400 copies/ml (1x) or population with advanced HIV (CD4 < 350 cells/ $\mu$ L) recently started ART and 35% with AIDS defining event, median CD4 164-165 cells/ $\mu$ L (1x) / setting: rural and periurban South Africa                   | 32.2-38 (mean) / >16 | ART task-shifting from doctors to nurses / maintenance of ART by trained nurses / various ART regimens                                                | ART maintenance from doctors with or without prior experience in the field / concomitant care by nurse (1x) | Death at 12 months | Parallel, cluster-RCT | 1-1.5 years duration (range); median 120 weeks duration |
| Li 2014 (54)    | Exenatide                          | Acute pancreatitis  | 5  | 3,998  | 7  | Male and female population with diabetes / mean BMI 30.5-32.5, mean HbA1c 7.5-8.5%, mean diabetes duration 4.9-9.6 years / included only population already treated with Metformin with or without Sulfonylureas / mostly (4x): population with inadequate glycaemic control only                                                                             | 52.3-58.9 (mean)     | Exenatide / dosing: 2mg/week (2x); 5 $\mu$ g twice/day for 4 weeks followed by 10 $\mu$ g twice/day for the remaining study duration (3x)             | Other antidiabetic drug (Pioglitazone, Insulin glargine, Glimepiride)                                       | Pancreatitis       | Parallel              | 26-234 weeks (range)                                    |
| Li 2016 (53)    | DDP-4 inhibitors                   | Heart failure       | 34 | 26,368 | 75 | Male and female population with diabetes / mean BMI 24.0-32.8, mean baseline HbA1c 7.1-9.9%, mean/median diabetes duration 1.7-17.5 years / mostly without prevalent CVD / mostly population already receiving antidiabetic treatment with different drugs: Metformin, Pioglitazone, Various oral antidiabetics with or without Insulin, Glyburide, Voglibose | 49.7-72.6 (mean)     | DPP-4 inhibitors, one per study (Sitagliptin, Vildagliptin, Linagliptin, Saxagliptin or Alogliptin) / mostly as add-on therapy, partly as monotherapy | Active drug (including Sulfonylureas and SGLT-2 inhibitors) or placebo                                      | Heart failure      | Parallel, factorial   | 12-206 weeks                                            |

|                    |                   |                                      |    |        |       |                                                                                                                                                                                                                                                                                                                                                                                        |                  |                                                                                                                                     |                                                                                                                                 |                                                                                                                                                                              |                     |                                   |
|--------------------|-------------------|--------------------------------------|----|--------|-------|----------------------------------------------------------------------------------------------------------------------------------------------------------------------------------------------------------------------------------------------------------------------------------------------------------------------------------------------------------------------------------------|------------------|-------------------------------------------------------------------------------------------------------------------------------------|---------------------------------------------------------------------------------------------------------------------------------|------------------------------------------------------------------------------------------------------------------------------------------------------------------------------|---------------------|-----------------------------------|
| Li 2016 (53)       | DDP-4 inhibitors  | Hospital admission for heart failure | 5  | 37,028 | 1,174 | Male and female population with diabetes / mostly with CVD, risk factors for CVD or with concomitant kidney disease / mean BMI 29.5-31.1, mean HbA1c level 7.8-8.1%, mean duration of diabetes 9.2-11.6 years / population receiving already standard diabetic therapy                                                                                                                 | 60.9-66.6 (mean) | DPP-4 inhibitors, one per study (Sitagliptin, Vildagliptin, Linagliptin, Saxagliptin or Alogliptin) / as add-on to standard therapy | Placebo; placebo or glimepiride (1x)                                                                                            | Hospital admission for heart failure                                                                                                                                         | Parallel            | 52-156 weeks                      |
| Matthews 2018 (86) | Tamoxifen         | Heart failure                        | 1  | 9,766  | NR    | Female post-menopausal population / with histologically confirmed breast adenocarcinoma and completed local treatment with curative intension / with or without involvement of lymph nodes, oestrogen-receptor-positive or progesterone-receptor-positive disease / population without: evidence of metastatic disease, severe CHD, other cancers                                      | 64 (median)      | Tamoxifen 20mg/day for 2-3 years followed by Exemestane 25mg/day until a total of 5 years of treatment                              | Exemestane 25mg/day for 5 years                                                                                                 | Heart failure                                                                                                                                                                | Parallel            | 5.1 years (median)                |
| Menne 2019 (87)    | SGLT-2 inhibitors | Acute kidney injury                  | 41 | 68,159 | 1,089 | Population with diabetes (mostly type II) / mostly receiving background therapy with other anti-diabetic drugs (Insulin, Metformin, DDP-4 Inhibitors, Sulfonylureas, other unspecified oral antidiabetics, standard care) / partly population with: drug-naive diabetes, type-I diabetes, CVD, including/excluding definite or advanced renal insufficiency (e.g. eGFR <30, <50 or 60) | NR               | SGLT-2 Inhibitors, one per study (Bexagliflozin, Canagliflozin, Dapagliflozin, Empagliflozin, Ertugliflozin)                        | Placebo or active drug / drugs: mostly DDP-4 Inhibitors or Sulfonylureas; partly: Semaglutide (1x), Metformin plus insulin (1x) | Any acute kidney injury (serious and non-serious); acute renal failure, renal impairment, renal failure (acute or chronic change), increase in creatinine or decline of eGFR | Parallel, factorial | 12 weeks-296 weeks study duration |

|                         |                                      |                           |    |       |     |                                                                                                                                                                                                                                                                                                                                                                              |                                              |                                                                                                                                                                                                                                                                                                                                                                                                                                                                                                                                                                                                                                                                                                                               |                                                                                                          |                                                                                                                                                                          |                        |                        |
|-------------------------|--------------------------------------|---------------------------|----|-------|-----|------------------------------------------------------------------------------------------------------------------------------------------------------------------------------------------------------------------------------------------------------------------------------------------------------------------------------------------------------------------------------|----------------------------------------------|-------------------------------------------------------------------------------------------------------------------------------------------------------------------------------------------------------------------------------------------------------------------------------------------------------------------------------------------------------------------------------------------------------------------------------------------------------------------------------------------------------------------------------------------------------------------------------------------------------------------------------------------------------------------------------------------------------------------------------|----------------------------------------------------------------------------------------------------------|--------------------------------------------------------------------------------------------------------------------------------------------------------------------------|------------------------|------------------------|
| Mesgarpour<br>2017 (88) | Erythropoiesis<br>stimulating agents | Venous<br>thromboembolism | 12 | 4,874 | 373 | Male and female adult<br>population / critically-ill<br>at ICU and mostly with<br>anemia (10x) / various<br>admission reasons (e.g.<br>multidisciplinary ICU,<br>medical or surgical ICU<br>for trauma, post-<br>operative, burns, patients<br>with PCI for STEMI)                                                                                                           | 60.9<br>(mean)/<br>≥18/ 15-<br>70<br>(range) | Erythropoiesis stimulating agents<br>/ drugs and dosing: repeated<br>administration of SC rHuEPO<br>300 IU/kg; SC injection of<br>rHuEPO 40,000 IU at study days<br>1, 7, 14; SC injection of Epoetin<br>alfa 40,000 IU at days 1, 8, 15;<br>IV injection of Erythropoietin-<br>beta 500 IU/kg to a maximum of<br>50,000 IU; two doses SC<br>rHuEPO 40,000 IU and Iron<br>saccharate; IV epoetin alfa<br>40,000 IU and IV Iron; SC<br>Epoetin alfa 10,000-40,000 IU<br>for 12 weeks or until Hb >12g/dl;<br>Epoetin alfa 40,000 IU weekly up<br>to 3 doses; IV EPO 40,000 IU<br>single bolus; IV Epo 500 IU/kg<br>1-3 doses; IV rHuEPO 150-300<br>IU/kg daily for up to 30 days; IV<br>Epoetin alfa 60,000 IU single<br>bolus | Placebo, IV iron<br>saccharate (1x), standard<br>care (1x), sodium chloride<br>(1x) or not reported (4x) | Venous<br>thromboembolism                                                                                                                                                | Parallel,<br>factorial | 5 days to 12<br>months |
| Mesgarpour<br>2017 (88) | Erythropoiesis<br>stimulating agents | All-cause<br>mortality    | 17 | 4,546 | NR  | Male and female adult<br>population / critically-ill<br>and mostly at ICU with<br>anemia (16x) / various<br>admission reasons<br>(trauma including<br>traumatic brain injury,<br>critical state after major<br>cardiac or cardiothoracic<br>or abdominal surgery,<br>anemia and sepsis,<br>severely burned) / partly<br>population in long-term<br>acute care hospitals (1x) | 15-70<br>(range)                             | Recombinant Erythropoietin-β or<br>Epoetin alfa for haematopoetic<br>indications / intravenous or<br>subcutaneous administration /<br>doses: 300 to 600 IU/kg (2000 to<br>50,000 IU), 1 to 12 doses / co-<br>interventions (for all patients): IV<br>Iron (2x), IV folic acid 1mg/day<br>+ IV Iron saccharate (1x)                                                                                                                                                                                                                                                                                                                                                                                                            | Placebo (saline (3x) or<br>not specified), usual care<br>(1x)                                            | Mortality;<br>assessment at<br>different time<br>points after<br>intervention<br>ranging from in-<br>hospital mortality<br>to 6 months;<br>mostly longer than<br>10 days | Parallel,<br>factorial | 5 days to 6<br>months  |

|                       |                                      |                                      |    |        |     |                                                                                                                                                                                                                                                                                                                                                                                                           |                           |                                                                                                                                                                                                         |                                                                                |                                      |                       |                                         |
|-----------------------|--------------------------------------|--------------------------------------|----|--------|-----|-----------------------------------------------------------------------------------------------------------------------------------------------------------------------------------------------------------------------------------------------------------------------------------------------------------------------------------------------------------------------------------------------------------|---------------------------|---------------------------------------------------------------------------------------------------------------------------------------------------------------------------------------------------------|--------------------------------------------------------------------------------|--------------------------------------|-----------------------|-----------------------------------------|
| Moberley 2013<br>(89) | Pneumococcal polysaccharide vaccines | Invasive pneumococcal disease        | 10 | 35,893 | 78  | Male and female adult population / institutionalised or community dwelling / with: risk factors for pneumococcal disease (age or other risk factors) / mostly immunocompetent / risk factors: advanced age, pulmonary disease (e.g. COPD, bronchogenic carcinoma), institutionalised, environmental factors (population in low-income countries) / partly without: cancer, organ dysfunctions, immobility | >40/ 42-106 (range)       | Different types of pneumococcal vaccines: 2- or 3-valent PPV, 12-valent PPV, 14-valent PPV, 17-valent PPV, 23-valent PPV / partly: administered with influenza as co-intervention for all patients (1x) | Mostly placebo or no vaccine / partly: influenza vaccine for all patients (1x) | Invasive pneumococcal disease        | Parallel, cluster-RCT | 2-2.9 years (mean)/ 0.5-3 years (range) |
| Molnar 2015<br>(35)   | Neoral (Cyclosporin)                 | Acute rejection of kidney transplant | 2  | 273    | 43  | Adult population with kidney transplant / differing status of transplant: older transplant with stable graft function (transplanted between 1 and 10 years prior to enrollment, no rejections in the past 6 months) or all incident transplants / setting: Iran and USA                                                                                                                                   | 38.1-39.3 (mean)/ NR (1x) | Neoral (Cyclosporin)                                                                                                                                                                                    | Iminoral, Consupren (generic Cyclosporin)                                      | Acute rejection of kidney transplant | Parallel              | 1 year                                  |
| Navarese 2013<br>(90) | Early intervention for NSTEMI-ACS    | All-cause mortality                  | 7  | 5,370  | 230 | Male and female population / undergoing PCI, CABG or medical treatment for ACS / with or without: metabolic disease, positive cardiac biomarkers, ST-segment depression, three-vessel CAD, use of Glycoprotein IIb/IIIa inhibitors / setting: mainly European (6x)                                                                                                                                        | 62-70 (mean)              | Early intervention for NSTEMI-ACS / time to intervention 0.5-14 hours                                                                                                                                   | Delayed strategy / time to intervention 20.5-86 hours                          | Mortality                            | Parallel              | 1-6 months (follow-up)                  |

|                       |                                      |                             |   |       |     |                                                                                                                                                                                                                                                                                                                                                   |                 |                                                                              |                                                             |                             |          |                           |
|-----------------------|--------------------------------------|-----------------------------|---|-------|-----|---------------------------------------------------------------------------------------------------------------------------------------------------------------------------------------------------------------------------------------------------------------------------------------------------------------------------------------------------|-----------------|------------------------------------------------------------------------------|-------------------------------------------------------------|-----------------------------|----------|---------------------------|
| Navarese 2013<br>(90) | Early intervention<br>for NSTEMI-ACS | Myocardial<br>infarction    | 7 | 5,340 | 408 | Male and female<br>population / undergoing<br>PCI, CABG or medical<br>treatment for ACS / with<br>or without: metabolic<br>disease, positive cardiac<br>biomarkers, ST-segment<br>depression, three-vessel<br>CAD, use of Glycoprotein<br>IIb/IIIa inhibitors /<br>setting: mainly European<br>(6x)                                               | 62-70<br>(mean) | Early intervention for NSTEMI-<br>ACS / time to intervention 0.5-14<br>hours | Delayed strategy / time to<br>intervention 20.5-86<br>hours | Myocardial<br>infarction    | Parallel | 1-6 months<br>(follow-up) |
| Navarese 2013<br>(90) | Early intervention<br>for NSTEMI-ACS | Major bleeding              | 7 | 5,370 | 173 | Male and female<br>population; undergoing<br>PCI, CABG or medical<br>treatment for ACS / with<br>or without: metabolic<br>disease, positive cardiac<br>biomarkers, ST-segment<br>depression, three-vessel<br>CAD, use of Glycoprotein<br>IIb/IIIa inhibitors / setting<br>mainly European (6x)                                                    | 62-70<br>(mean) | Early intervention for NSTEMI-<br>ACS / time to intervention 0.5-14<br>hours | Delayed strategy / time to<br>intervention 20.5-86<br>hours | Major bleeding              | Parallel | 1-6 months<br>(follow-up) |
| Nelson 2010<br>(36)   | Caesarean section                    | Anal incontinence,<br>feces | 1 | 1,226 | NR  | Pregnant women, general<br>population / singleton<br>living fetus in breech<br>presentation, 50%<br>primipara (with or<br>without prior vaginal<br>delivery) / without further<br>contraindication to<br>vaginal delivery (e.g. fetal<br>weight >4 kg, feto-pelvic<br>dysproportion, placenta<br>previa) / setting: highly<br>developed countries | ≈30% ><br>30    | Caesarean section (planned)                                                  | Trial of vaginal labour                                     | Anal incontinence,<br>feces | Parallel | 3 months to 2<br>years    |

|                         |                                                        |                           |    |       |     |                                                                                                                                                                                                                                                                                                               |                                 |                                                                                                                                                                    |                                                                                |                                                                                                 |          |                              |
|-------------------------|--------------------------------------------------------|---------------------------|----|-------|-----|---------------------------------------------------------------------------------------------------------------------------------------------------------------------------------------------------------------------------------------------------------------------------------------------------------------|---------------------------------|--------------------------------------------------------------------------------------------------------------------------------------------------------------------|--------------------------------------------------------------------------------|-------------------------------------------------------------------------------------------------|----------|------------------------------|
| Nelson 2010 (36)        | Caesarean section                                      | Anal incontinence, flatus | 1  | 1,226 | NR  | Pregnant women, general population / singleton living fetus in breech presentation, 50% primipara (with or without prior vaginal delivery) / without further contraindication to vaginal delivery (e.g. fetal weight >4 kg, feto-pelvic disproportion, placenta previa) / setting: highly developed countries | ≈30% > 30                       | Caesarean section (planned)                                                                                                                                        | Trial of vaginal labour                                                        | Anal incontinence, flatus                                                                       | Parallel | 3 months                     |
| Nieuwenhuijse 2014 (37) | Ceramic-on-ceramic bearings for total hip arthroplasty | Harris Hip Score          | 7  | 1,334 | NR  | Male and female population, mostly with osteoarthritis (range 72-77% or NR) (other indications for arthroplasty: avascular necrosis, fracture) / mostly active or young populations only (6x) or broader populations with advanced age and hip fracture                                                       | 45.3-72.7 (mean)/ 12-76 (range) | Ceramic-on-ceramic bearings for total hip arthroplasty                                                                                                             | Metal-on-polyethylene or ceramic-on-polyethylene bearings for hip arthroplasty | Harris-Hip score at short-, mid-, or long-term                                                  | Parallel | 2-12.4 years (mean)          |
| Nieuwenhuijse 2014 (37) | High-flexion total knee arthroplasty                   | Flexion                   | 20 | 2,042 | NR  | Male and female population / mostly with osteoarthritis / all patients or only active patients                                                                                                                                                                                                                | 61.4-70.6 (mean)/ 43-86 (range) | High flexion prosthesis for total knee arthroplasty                                                                                                                | Standard prosthesis for total knee arthroplasty                                | Flexion in degrees at short-, mid-, or long-term                                                | Parallel | 1-11 years (mean)            |
| Nieuwenhuijse 2014 (37) | Gender-specific total knee arthroplasty                | Flexion-extension range   | 6  | 866   | NR  | Female population with osteoarthritis / partly without: CVD (1x)                                                                                                                                                                                                                                              | 66-71.2 (mean)/ 47-87 (range)   | Gender-specific prosthesis for total knee arthroplasty                                                                                                             | Non-gender specific prosthesis for total knee arthroplasty                     | Flexion-extension range of motion, short-term                                                   | Parallel | 6 weeks to 3.25 years (mean) |
| Nikooie 2019 (55)       | Second generation antipsychotics                       | Sedation                  | 6  | 872   | 119 | Male and female population with delirium / inpatients with or without critical illness (ICU, mechanical ventilation) / partly without: dementia, substance-induced delirium                                                                                                                                   | 44-67 (mean)                    | Second generation antipsychotic / any drug or specific: Olanzapine 3.1-5.5 mg/day; Quetiapine 67.6 mg/day; Risperidone 1 mg/day; Ziprasidone 20mg/day (mean doses) | Haloperidol / mean dose: 0.8-11 mg/day                                         | Sedation outcomes: Sleepiness, excessive/severe sedation, somnolence, hypersomnia, oversedation | Parallel | NR                           |

|                   |                                     |                     |    |        |     |                                                                                                                                                                                                                                                                                                                                                                                               |                                 |                                                                                                                                                                        |                                                                                                                                                                                                                                                                                                                                 |                                                                       |          |                      |
|-------------------|-------------------------------------|---------------------|----|--------|-----|-----------------------------------------------------------------------------------------------------------------------------------------------------------------------------------------------------------------------------------------------------------------------------------------------------------------------------------------------------------------------------------------------|---------------------------------|------------------------------------------------------------------------------------------------------------------------------------------------------------------------|---------------------------------------------------------------------------------------------------------------------------------------------------------------------------------------------------------------------------------------------------------------------------------------------------------------------------------|-----------------------------------------------------------------------|----------|----------------------|
| Nikooie 2019 (55) | Second generation antipsychotics    | Neurologic outcomes | 6  | 869    | 19  | Male and female population with delirium / inpatients with or without critical illness (ICU, mechanical ventilation) / partly without: dementia, substance-induced delirium                                                                                                                                                                                                                   | 44-67 (mean)                    | Second generation antipsychotic /any drug or specific: Olanzapine 3.1-5.5 mg/day; Quetiapine 67.6 mg/day; Risperidone 1 mg/day; Ziprasidone 20-113 mg/day (mean doses) | Haloperidol / mean/median dose: 0.8-15 mg/d                                                                                                                                                                                                                                                                                     | Extrapyramidal symptoms, dystonia, akathisia, tremors, rigidity, tics | Parallel | NR                   |
| Ochen 2019 (91)   | Surgery for achilles tendon rupture | Re-rupture          | 10 | 944    | 70  | Mostly male (~83%) young adult and middle-aged population with acute achilles tendon rupture / setting: highly developed countries                                                                                                                                                                                                                                                            | 37.2-41.8 (mean)/ 21-77 (range) | Surgical Achilles tendon repair / open surgery; minimal-invasive procedure (1x)                                                                                        | Nonoperative treatment / cast, brace or orthosis for 7-10 weeks, with or without early weight bearing; partly with early functional rehabilitation                                                                                                                                                                              | Re-rupture                                                            | Parallel | 12-30 months (mean)  |
| Ochen 2019 (91)   | Surgery for achilles tendon rupture | Complications       | 9  | 894    | 128 | Mostly male (~80%) young adult and middle-aged population with acute achilles tendon rupture / setting: highly developed countries                                                                                                                                                                                                                                                            | 37.2-41.8 (mean)/ 21-77 (range) | Surgical Achilles tendon repair / open surgery; minimal-invasive procedure (1x)                                                                                        | Nonoperative treatment / cast, brace or orthosis for 7-10 weeks, with or without early weight bearing; partly with early functional rehabilitation                                                                                                                                                                              | Complications (Infections, Thrombosis and others)                     | Parallel | 12-30 months (mean)  |
| Pittas 2010 (60)  | Vitamin D                           | Hypertension        | 1  | 17,122 | NR  | Female population / postmenopausal without hypertension / setting: USA                                                                                                                                                                                                                                                                                                                        | 50-79 (range)                   | Supplements / vitamin D3 400 IU/day and calcium carbonate 1000 mg/day                                                                                                  | Placebo                                                                                                                                                                                                                                                                                                                         | Incident hypertension (self-reported by participants)                 | Parallel | 7 years (duration)   |
| Raman 2013 (38)   | Carotid endarterectomy              | Ipsilateral stroke  | 3  | 5,223  | 308 | Male and female population with asymptomatic carotid artery stenosis / without: severe disease (3x) (likely leading to death or death and disability in next 5 years/ precluding long-term follow-up), contralateral cerebrovascular symptoms (2x), lesions too complicated for surgery (2x), history of CHD (1x) / with or without: hypertension, metabolic disease, smokers and non-smokers | 64.1-68 (mean)/ 40-91 (range)   | Carotid endarterectomy / additional medical therapy according to physician or local standard (Aspirin 325mg/day to 650mg/2x daily)                                     | Medical therapy according to physician or local standard (Aspirin 325mg/d to 650mg/2x daily) / with or without deferred carotid endarterectomy if symptoms occur / additional modification of cardiovascular risk factors (not meeting current standards): treatment of hypertension and diabetes, partly lipid lowering agents | Ipsilateral stroke (including any stroke within 30 days)              | Parallel | 4.4-9 years (median) |

|                        |                         |                         |   |       |     |                                                                                                                                                                                                                                                                                                                                                                                               |                               |                                                                                                                                                                                                                                      |                                                                                                                                                                                                                                                                                                                                 |                                                                                                                                               |          |                      |
|------------------------|-------------------------|-------------------------|---|-------|-----|-----------------------------------------------------------------------------------------------------------------------------------------------------------------------------------------------------------------------------------------------------------------------------------------------------------------------------------------------------------------------------------------------|-------------------------------|--------------------------------------------------------------------------------------------------------------------------------------------------------------------------------------------------------------------------------------|---------------------------------------------------------------------------------------------------------------------------------------------------------------------------------------------------------------------------------------------------------------------------------------------------------------------------------|-----------------------------------------------------------------------------------------------------------------------------------------------|----------|----------------------|
| Raman 2013<br>(38)     | Carotid endarterectomy  | Stroke                  | 3 | 5,223 | 508 | Male and female population with asymptomatic carotid artery stenosis / without: severe disease (3x) (likely leading to death or death and disability in next 5 years/ precluding long-term follow-up), contralateral cerebrovascular symptoms (2x), lesions too complicated for surgery (2x), history of CHD (1x) / with or without: hypertension, metabolic disease, smokers and non-smokers | 64.1-68 (mean)/ 40-91 (range) | Carotid endarterectomy / additional medical therapy according to physician or local standard (Aspirin 325mg/day to 650mg/2x daily)                                                                                                   | Medical therapy according to physician or local standard (Aspirin 325mg/d to 650mg/2x daily) / with or without deferred carotid endarterectomy if symptoms occur / additional modification of cardiovascular risk factors (not meeting current standards): treatment of hypertension and diabetes, partly lipid lowering agents | Any stroke (including any death within 30 days) / defined as events of perioperative stroke or death or any nonperioperative territory stroke | Parallel | 4.4-9 years (median) |
| Raman 2013<br>(38)     | Carotid artery stenting | Periprocedural stroke   | 2 | 1,418 | 33  | Male and female population with asymptomatic carotid stenosis / without: acute CHD/ arrhythmia (1x) / with or without: hypertension, metabolic disease, smokers and non-smokers, previous severe stroke (1x), stroke within 48 hours (1x), at least one high risk factor (e.g. severe CHD, severe pulmonary disease)                                                                          | 69.3-72.5 (mean)              | Carotid artery stenting (by experienced surgeon at tertiary care center) plus dual antiplatelet therapy (Aspirin plus Thienopyridines)                                                                                               | Carotid endarterectomy (by experienced surgeon at tertiary care center) plus medical therapy / medical therapy: single agent antiplatelet treatment (Aspirin or Thienopyridines) or combination of Aspirin and Extended-release Dipyridamole                                                                                    | Any periprocedural stroke                                                                                                                     | Parallel | 3-4 years (range)    |
| Schweizer 2013<br>(39) | Nasal decontamination   | Surgical site infection | 5 | 3,029 | 136 | Male and female population / inpatients at orthopaedic or cardiac surgery ward / setting: USA, Canada and The Netherlands                                                                                                                                                                                                                                                                     | NR                            | Nasal Mupirocin alone or with Chlorhexidine soap (1x) / dose: 2% or 2.15% Mupirocin / start: 5-7 days preoperatively (2x) or not reported / treatment regardless of carrier status (MRSA/ MSSA) or for MRSA/ MSSA carriers only (2x) | Placebo                                                                                                                                                                                                                                                                                                                         | Wound infections, mostly assessed by Center for Disease Control criteria                                                                      | Parallel | NR                   |



|                        |                          |                                              |    |        |       |                                                                                                                                                                                                                                                                                                                             |    |                                                                                                                                                                                                                                                                                                   |                                                                                                                                                                                                                                                                                                               |                                                                          |          |                                           |
|------------------------|--------------------------|----------------------------------------------|----|--------|-------|-----------------------------------------------------------------------------------------------------------------------------------------------------------------------------------------------------------------------------------------------------------------------------------------------------------------------------|----|---------------------------------------------------------------------------------------------------------------------------------------------------------------------------------------------------------------------------------------------------------------------------------------------------|---------------------------------------------------------------------------------------------------------------------------------------------------------------------------------------------------------------------------------------------------------------------------------------------------------------|--------------------------------------------------------------------------|----------|-------------------------------------------|
| Schweizer 2013<br>(39) | Glycopeptide prophylaxis | Surgical site infection                      | 8  | 6,379  | 282   | Male and female population / mostly cardiac surgery patients, orthopaedic surgery (1x)                                                                                                                                                                                                                                      | NR | Prophylactic treatment with Vancomycin or Teicoplanin / alone or with Rifampicin, Gentamicin or Ticarcillin/ Clavulanate                                                                                                                                                                          | Prophylactic treatment with Cephalosporins (Cefuroxime, Cefazolin, Ceftriaxone)                                                                                                                                                                                                                               | Wound infections, mostly assessed by Center for Disease Control criteria | Parallel | 30 days to 6 months, mostly not specified |
| Silvain 2012<br>(40)   | Enoxaparin               | All-cause mortality                          | 6  | 14,749 | 299   | Mostly male population with CAD/ CHD / mostly with MI (4x) and undergoing PCI or elective PCI only (2x) / with: postfibrinolytic PCI only (2x) / without: MI complicated by cardiogenic shock (2x) / "real world" MI population (1x) / with or without: metabolic disease                                                   | NR | Enoxaparin / SC or IV / dosing: 0.5-1mg/kg, single bolus or repeated administration regimens (every 12 hours) / with or without: additional bolus during PCI / additional unfractionated Heparin during PCI (1x) / mostly additional anticoagulation (e.g. Aspirin, Clopidigrel) for all patients | Unfractionated Heparin / IV / 50-100 IU/kg bolus with or without Glycoprotein IIb/IIIa inhibitors / with or without continued administration after bolus (12 IU/kg/h or titration to activated clotting time 200-300 seconds)                                                                                 | All-cause mortality                                                      | Parallel | In-hospital to 12 months                  |
| Silvain 2012<br>(40)   | Enoxaparin               | Major bleeding                               | 9  | 15,946 | 372   | Mostly male population with CAD/ CHD / with: elective PCI only (5x) or urgent PCI for MI (4x) / with: postfibrinolytic PCI (2x) / "real world" MI population (1x) / without: MI complicated by cardiogenic shock (3x), increased risk for bleeding (1x), previous anticoagulation (5x) / with or without: metabolic disease | NR | Enoxaparin / SC or IV / dosing: 0.5-1mg/kg; single bolus or repeated administration regimens (every 12 hours) / with or without: additional bolus during PCI / additional unfractionated Heparin during PCI (1x) / mostly additional anticoagulation (e.g. Aspirin, Clopidigrel) for all patients | Unfractionated Heparin / IV / 50-100 IU/kg or 10,000 IU bolus with or without Glycoprotein IIb/IIIa inhibitors (if these were administered, the Heparin dose was usually reduced) / with or without continued administration after bolus (12 IU/kg/h or titration to activated clotting time 200-300 seconds) | Major bleeding (STEEPLE, TIMI or individual study definition)            | Parallel | In-hospital to 12 months                  |
| Silvain 2012<br>(40)   | Enoxaparin               | All-cause mortality or myocardial infarction | 13 | 15,733 | 1,520 | Mostly male population with CAD/ CHD / elective (9x) or urgent PCI (4x) / with: postfibrinolytic PCI (1x) / "real world" MI population (1x) / without: MI complicated by cardiogenic shock (2x), prior thrombolysis or anticoagulation (6x) / with or without:                                                              | NR | Enoxaparin / SC or IV / dosing: 0.5-1mg/kg; single bolus or repeated administration regimens (every 12 hours) / with or without: additional bolus during PCI / additional Abciximab (1x) / mostly additional anticoagulation (e.g. Aspirin, Clopidigrel) for all patients                         | Unfractionated Heparin / IV / 50-100 IU/kg or 10,000 IU bolus with or without Glycoprotein IIb/IIIa inhibitors (if these were administered, the Heparin dose was usually reduced) / with or without continued administration after bolus (12 IU/kg/h or titration to activated clotting time 200-300          | Death or Myocardial infarction                                           | Parallel | In-hospital to 1 month                    |

|                      |                        |                        |    |       |     |                                                                                                                                                                                                                                                                                                                                         |               |                                                                                                                                                                                                                                                     |                                                                                                                                                                                                                                                                                                                                                                                      |                                                                                                           |                                         |                                 |
|----------------------|------------------------|------------------------|----|-------|-----|-----------------------------------------------------------------------------------------------------------------------------------------------------------------------------------------------------------------------------------------------------------------------------------------------------------------------------------------|---------------|-----------------------------------------------------------------------------------------------------------------------------------------------------------------------------------------------------------------------------------------------------|--------------------------------------------------------------------------------------------------------------------------------------------------------------------------------------------------------------------------------------------------------------------------------------------------------------------------------------------------------------------------------------|-----------------------------------------------------------------------------------------------------------|-----------------------------------------|---------------------------------|
|                      |                        |                        |    |       |     | metabolic disease                                                                                                                                                                                                                                                                                                                       |               |                                                                                                                                                                                                                                                     | seconds)                                                                                                                                                                                                                                                                                                                                                                             |                                                                                                           |                                         |                                 |
| Suthar 2012 (26)     | Antiretroviral therapy | Tuberculosis infection | 2  | 2,536 | 104 | Male and female adult population with HIV, CD4 count: 200-550 cells/ $\mu$ L (range), 280-442 cells/ $\mu$ L (median) / BMI 21.0-21.3 (median) / without: preexisting advanced HIV infection (previous or current AIDS defining disease or HIV infection WHO stage 4) and previous exposure to ART (2x) / setting: developing countries | $\geq 18$     | Immediate ART with $\geq 3$ antiretroviral drugs / ART: $\geq 3$ of any antiretroviral drugs (1x) or two nucleoside reverse transcriptase inhibitors plus either a non-nucleoside reverse transcriptase inhibitor or a protease inhibitor (1x)      | Delayed ART initiated at decline of CD4 count to 200-250 cells/ $\mu$ L (1x) or when clinical AIDS developed (1x)                                                                                                                                                                                                                                                                    | Tuberculosis infection (AIDS clinical trials group definition, American Thoracic society case definition) | Parallel, randomization of couples (1x) | 20.4-21 months median follow-up |
| Te Morenga 2013 (61) | Sugar                  | Weight gain            | 10 | 509   | NR  | Male and female population / healthy (5x) or with: overweight or obesity (4x) post-obese (1x) / additionally (for non-healthy): metabolic disease (1x), disease of the gallbladder (1x) or CVD risk factors (1x)                                                                                                                        | 20-55 (range) | High-sugar diet with sugar-rich (glucose, fructose, sucrose) food, drinks or both / sugar in foods: 80 to $>100$ g/day or 28% of total energy / sugar sweetened beverages: 1L or 1135 g/day / partly: additional fibre depletion (1x), low fat (1x) | Diet with high amount of complex carbohydrates (e.g. starch), artificial sweeteners or low to moderate sugars (10-40g/day) / additionally: partly fibre depletion (1x), low fat (1x)                                                                                                                                                                                                 | Weight gain                                                                                               | Parallel, cross-over                    | 2 weeks to 6 months             |
| Te Morenga 2013 (61) | Sugar                  | Body Mass Index        | 3  | 1,627 | NR  | Male and female schoolchildren (2x) (elementary school) and adolescents (1x) / general population / without: smokers, major medical illness, eating disorder (BMI $<25$ th age percentile) (1x)                                                                                                                                         | 7-18 (range)  | General dietary advice, nutrition education without specific advice regarding reduction of sugars or no intervention                                                                                                                                | Reduced sugar intake / intervention descriptions: counselling to reduce sugar-sweetened beverages, home deliveries of non-caloric beverages (4 servings/day) (1x); nutrition education to reduce fat and sugar intake and increase intake of complex carbohydrates (1x); behavioural classroom intervention to reduce intake of sugar sweetened beverages (10x 1-hour sessions) (1x) | Change in BMI                                                                                             | Parallel, cluster-RCT                   | 25 weeks-8 months (duration)    |

|                           |                    |                                        |   |       |     |                                                                                                                                                                                                                                                                                                            |                              |                                                                                                                                                                                                               |                                                                                                                                   |                                                                                                                                                                                 |             |                                                                                                              |
|---------------------------|--------------------|----------------------------------------|---|-------|-----|------------------------------------------------------------------------------------------------------------------------------------------------------------------------------------------------------------------------------------------------------------------------------------------------------------|------------------------------|---------------------------------------------------------------------------------------------------------------------------------------------------------------------------------------------------------------|-----------------------------------------------------------------------------------------------------------------------------------|---------------------------------------------------------------------------------------------------------------------------------------------------------------------------------|-------------|--------------------------------------------------------------------------------------------------------------|
| Thomas 2010 (92)          | Influenza vaccines | Influenza-like illness                 | 3 | 7,031 | 688 | Population (included for intervention): mostly female ( $\approx 70\%$ ) health care workers / setting: nursing homes or geriatric long-stay hospitals in UK or France with elderly population with varying health status / 0-80% of residents with influenza vaccination per facility                     | 77-86 (mean)                 | Actively promoting influenza vaccination for health care workers / methods: offering vaccination or actively promoting vaccination (informational material, specially trained nurses, interviews)             | General information about influenza vaccination or not offering vaccination to health care workers                                | Influenza like illness in residents, clinical definition (fever or an acute deterioration in physical or mental ability plus typical symptoms of a viral respiratory infection) | Cluster-RCT | 5 months or during influenza season (follow-up)                                                              |
| Tickell-Painter 2017 (93) | Mefloquine         | Discontinuation due to adverse effects | 3 | 1,438 | 52  | Mostly healthy adult short-term travellers from high income countries / without: alcoholism, psychiatric or severe neurologic disorders, drug hypersensitivity, pregnancy or lactation, severe blood disorders, organ dysfunctions, previous malaria, recent stay in endemic area / included children (1x) | 33-35.3 (mean)/ 3-70 (range) | Mefloquine / dose: 250mg/week (less for children according to weight) / duration: 1-3 weeks before to 4 weeks after travel                                                                                    | Atovaquone-proguanil / dose: 250mg/day (for children according to weight) / duration: 1-17 days before to 1 week after travelling | Discontinuation of study drug due to adverse effects                                                                                                                            | Parallel    | 7-60 days follow-up/<br>Mean duration of exposure to malaria: 2.5 weeks or 19 days (mean), 1-3 weeks (range) |
| Tickell-Painter 2017 (93) | Mefloquine         | Serious adverse events or effects      | 3 | 747   | 3   | Generally healthy male population from Ivory Coast and Thailand / pregnant women from Thailand (1x)                                                                                                                                                                                                        | 16-60 (range)                | Mefloquine / dosing: 250mg/week for 4 weeks followed by maintenance dose of 125mg/week / additional loading dose of 500mg (1x)                                                                                | Placebo                                                                                                                           | Serious adverse events, including childhood deaths (1x)                                                                                                                         | Parallel    | 20-24 weeks, NR (1x)                                                                                         |
| Tickell-Painter 2017 (93) | Mefloquine         | Nausea                                 | 2 | 244   | 119 | Diverse adult population / pregnant Thai women in malaria-endemic area (presumed semi-immune) and non-pregnant healthy Dutch volunteers (not exposed to malaria)                                                                                                                                           | Pregnant women; adults       | Mefloquine / dosing: 250 mg/week for 4 weeks, then 125 mg/week until delivery, with or without 500 mg loading dose (1x) or 250 mg tablet weekly with loading dose (one tablet daily for 3 days in week 1)(1x) | Placebo                                                                                                                           | Nausea                                                                                                                                                                          | Parallel    | 30 days to 20 weeks (range)                                                                                  |

|                      |                                 |                         |   |        |       |                                                                                                                                                                                                                                             |                           |                                                                                                          |                                                                                 |                                          |          |                                                                                      |
|----------------------|---------------------------------|-------------------------|---|--------|-------|---------------------------------------------------------------------------------------------------------------------------------------------------------------------------------------------------------------------------------------------|---------------------------|----------------------------------------------------------------------------------------------------------|---------------------------------------------------------------------------------|------------------------------------------|----------|--------------------------------------------------------------------------------------|
| Tricco 2018<br>(45)  | Live-attenuated zoster vaccines | Suspected Herpes Zoster | 5 | 62,529 | 1,597 | Male and female population / mostly immunocompetent population (e.g. no use of steroids), partly: immunocompromised (1x) / with: previous chickenpox / mostly without: previous herpes-zoster                                               | 66.2 (mean)-69.0 (median) | Live-attenuated zoster vaccines (Zostavax, Oka/Merck); Zostavax + Pneumovax 23 (1x) / one dose           | Placebo; Placebo plus Pneumovax 23 vaccine and delayed zoster vaccination (1/5) | Suspected herpes zoster                  | Parallel | 2-65 months (range); follow-up of 2 months in one study applying delayed vaccination |
| Vinceti 2018<br>(59) | Selenium                        | Cancer                  | 5 | 21,860 | 2,332 | Population with diverse health status / without: prostate cancer, haemorrhagic stroke, hypertension or with: high risk for prostate cancer, completely resected stage I non-small-cell lung cancer, BRCA1+ mutation, history of skin cancer | 62-66 (mean)              | Selenium supplements (selenium yeast, sodium selenite or selenomethionine) / P.O. / dose: 200 -400µg/day | Placebo                                                                         | Any cancer, lung cancer, prostate cancer | Parallel | 3-13 years (follow-up)                                                               |
| Vinceti 2018<br>(59) | Selenium                        | Cancer mortality        | 2 | 18,698 | 359   | Population with diverse health status / without: prostate cancer, haemorrhagic stroke, hypertension or with: history of skin cancer                                                                                                         | 62-63 (mean)              | Selenium supplements (selenium yeast or selenomethionine) / P.O. / dose: 200µg/day                       | Placebo                                                                         | Mortality from any cancer                | Parallel | 8-13 years (follow-up)                                                               |
| Vinceti 2018<br>(59) | Selenium                        | Colorectal cancer       | 3 | 20,259 | 159   | Population with diverse health status / without: prostate cancer, haemorrhagic stroke, hypertension or with: history of skin cancer, completely resected stage I non-small-cell lung cancer                                                 | 62-66 (mean)              | Selenium supplements (selenium yeast or selenomethionine) / P.O. / dose: 200µg/day                       | Placebo                                                                         | Colorectal cancer                        | Parallel | 8-13 years (follow-up)                                                               |

|                     |                                    |                         |   |         |       |                                                                                                                                                                                                                                                                                                                     |                                        |                                                                                                                                                                                                                                                |                                                                                  |                        |             |                     |
|---------------------|------------------------------------|-------------------------|---|---------|-------|---------------------------------------------------------------------------------------------------------------------------------------------------------------------------------------------------------------------------------------------------------------------------------------------------------------------|----------------------------------------|------------------------------------------------------------------------------------------------------------------------------------------------------------------------------------------------------------------------------------------------|----------------------------------------------------------------------------------|------------------------|-------------|---------------------|
| Wilson 2011<br>(41) | Traditional birth attendants       | Perinatal mortality     | 5 | 110,068 | 6,207 | Women giving birth in rural settings of low-income countries (Congo, Guatemala, India, Pakistan and Zambia)                                                                                                                                                                                                         | 25.3-26.7 (mean)/NR (3x)               | Enhanced training for traditional birth attendants (antenatal, intrapartum and postpartum care) or newborn-care training only / co-interventions: for all participants or intervention arm only (2x): resource support (e.g. clean birth kits) | Less intensive training for traditional birth attendants or no intervention (2x) | Perinatal mortality    | Cluster-RCT | NR                  |
| Wilson 2011<br>(41) | Traditional birth attendants       | Neonatal mortality      | 6 | 133,629 | 3,900 | Women giving birth in rural settings of low-income countries (Bangladesh, Congo, Guatemala, India, Pakistan and Zambia)                                                                                                                                                                                             | 25.3-26.7 (mean)/20-29 (range)/NR (3x) | Enhanced training for traditional birth attendants (antenatal, intrapartum and postpartum care) or newborn-care training only / co-interventions: for all participants or intervention arm only (2x): resource support (e.g. clean birth kits) | Less intensive training for traditional birth attendants or no intervention (2x) | Neonatal mortality     | Cluster-RCT | NR                  |
| Wilson 2019<br>(42) | Unicompartmental knee arthroplasty | Venous thromboembolism  | 2 | 614     | 7     | Male and female population with anteromedial osteoarthritis / health status: good (medically fit, ASA-score 1/2, without prior surgery of the knee) or health status NR / BMI $\approx$ 31 or NR / functioning anterior cruciate ligament (1x)                                                                      | 64.7-69.7 (mean)/47-89 (range)         | Unicompartmental knee arthroplasty                                                                                                                                                                                                             | Total knee arthroplasty                                                          | Venous thromboembolism | Parallel    | 1-5 years follow-up |
| Wilson 2019<br>(42) | Unicompartmental knee arthroplasty | Flexion-extension range | 3 | 270     | NR    | Male and female population with anteromedial osteoarthritis / diverse health status: healthy (2x) (no major deformity, BMI <30 or without: serious liver-, heart-, renal disease, chronic pain, complex osteoarthritis) or health status NR (1x) / mean BMI 30 or NR / with (3x): intact anterior cruciate ligament | 60.5-69.7 (mean)/47-89 (range)         | Unicompartmental knee arthroplasty                                                                                                                                                                                                             | Total knee arthroplasty                                                          | Range of movement      | Parallel    | 4-5 years follow-up |

|                     |                                       |                        |   |     |    |                                                                                                                                                                                                                                                                                                                                                                                                                                            |                              |                                                                                                                                                                          |                         |                          |          |                        |
|---------------------|---------------------------------------|------------------------|---|-----|----|--------------------------------------------------------------------------------------------------------------------------------------------------------------------------------------------------------------------------------------------------------------------------------------------------------------------------------------------------------------------------------------------------------------------------------------------|------------------------------|--------------------------------------------------------------------------------------------------------------------------------------------------------------------------|-------------------------|--------------------------|----------|------------------------|
| Wilson 2019<br>(42) | Unicompartmental<br>knee arthroplasty | Operation duration     | 3 | 660 | NR | Male and female adult<br>population with<br>anteromedial or medial<br>osteoarthritis or<br>simultaneous bilateral<br>anteriomedial<br>osteoarthritis / health<br>status diverse: healthy<br>(2x) (medically fit, ASA<br>1/2, no major deformity,<br>BMI<30, without serious<br>liver-, heart-, renal<br>disease, chronic pain,<br>complex osteoarthritis) or<br>health status NR / mean<br>BMI 27.5-31 / primary<br>arthroplasty only (2x) | 59.72-<br>65.2<br>(mean)     | Unicompartmental knee<br>arthroplasty                                                                                                                                    | Total knee arthroplasty | Operation<br>duration    | Parallel | 1-4 years<br>follow-up |
| Yank 2011<br>(44)   | Recombinant factor<br>VII             | All-cause<br>mortality | 2 | 191 | 15 | Male and female<br>population undergoing<br>cardiac surgery / with or<br>without post-operative<br>bleeding / without: recent<br>thrombotic disease,<br>history of stroke, required<br>urgent re-operation                                                                                                                                                                                                                                 | 62-69.5<br>(mean/<br>median) | Recombinant factor VIIa / dose:<br>40-90 µg/kg / administered after<br>cardiopulmonary bypass surgery /<br>either prophylactic or treatment<br>of postoperative bleeding | Placebo                 | In-hospital<br>mortality | Parallel | NR                     |
| Yank 2011<br>(44)   | Recombinant factor<br>VII             | Thromboembolism        | 2 | 191 | 12 | Male and female<br>population undergoing<br>cardiac surgery / with or<br>without post-operative<br>bleeding / without: recent<br>thrombotic disease,<br>history of stroke, required<br>urgent re-operation                                                                                                                                                                                                                                 | 62-69.5<br>(mean/<br>median) | Recombinant factor VIIa / dose:<br>40-90µg/kg / administered after<br>cardiopulmonary bypass surgery /<br>either prophylactic or treatment<br>of postoperative bleeding  | Placebo                 | Thromboembolic<br>events | Parallel | NR                     |

|                    |                                                          |                                     |   |       |    |                                                                                                                                                                                                                                                                                                         |                         |                                                                                    |                                                                 |                                                                                                                                                                                                                                                                                 |          |                                     |
|--------------------|----------------------------------------------------------|-------------------------------------|---|-------|----|---------------------------------------------------------------------------------------------------------------------------------------------------------------------------------------------------------------------------------------------------------------------------------------------------------|-------------------------|------------------------------------------------------------------------------------|-----------------------------------------------------------------|---------------------------------------------------------------------------------------------------------------------------------------------------------------------------------------------------------------------------------------------------------------------------------|----------|-------------------------------------|
| Zhang 2016<br>(94) | Everolimus-eluting<br>bioresorbable<br>vascular scaffold | Stent thrombosis                    | 5 | 3,541 | 36 | Male (>70%) and female<br>population with CHD /<br>type of CHD: angina<br>pectoris (excluding acute<br>MI) (4x), MI (1x) / with<br>or without: metabolic<br>disease, hypertension,<br>smokers and non-smokers<br>/ setting: China, Europe,<br>Japan, USA                                                | 57.2-<br>67.3<br>(mean) | Coronary stenting with<br>Everolimus-eluting<br>bioresorbable<br>vascular scaffold | Coronary stenting with<br>Everolimus-eluting<br>metallic stents | Stent thrombosis<br>(definite or<br>probable) mostly<br>defined as:<br>definite:<br>angiographic or<br>pathological<br>confirmation,<br>probable<br>thrombosis:<br>typical clinical<br>presentation<br>without<br>angiographic<br>correlate and<br>without other<br>explanation | Parallel | 6-12 months<br>follow-up<br>(range) |
| Zhang 2016<br>(94) | Everolimus-eluting<br>bioresorbable<br>vascular scaffold | All-cause<br>mortality              | 5 | 3,522 | 30 | Male (>70%) and female<br>population with CHD /<br>type of CHD: angina<br>pectoris (excluding acute<br>MI) (4x), mixed<br>population with angina<br>pectoris or MI (1x) / with<br>or without: metabolic<br>disease, hypertension,<br>smokers and non-smokers<br>/ setting: China, Europe,<br>Japan, USA | 57.2-<br>67.3<br>(mean) | Coronary stenting with<br>Everolimus-eluting<br>bioresorbable<br>vascular scaffold | Coronary stenting with<br>Everolimus-eluting<br>metallic stents | All-cause death                                                                                                                                                                                                                                                                 | Parallel | 9-12 months<br>follow-up<br>(range) |
| Zhang 2016<br>(94) | Everolimus-eluting<br>bioresorbable<br>vascular scaffold | Coronary heart<br>disease mortality | 3 | 2,623 | 13 | Male (>70%) and female<br>population with CHD /<br>type of CHD: angina<br>pectoris (excluding acute<br>MI) (2x), mixed<br>population with angina or<br>MI (1x) / with or without:<br>metabolic disease,<br>hypertension, smokers<br>and non-smokers / setting:<br>China, Europe, USA                    | 57.2-65<br>(mean)       | Coronary stenting with<br>Everolimus-eluting<br>bioresorbable<br>vascular scaffold | Coronary stenting with<br>Everolimus-eluting<br>metallic stents | Cardiac death                                                                                                                                                                                                                                                                   | Parallel | 9-12 months<br>follow-up<br>(range) |

|                 |                                    |                          |   |       |     |                                                                                                                                                                                                                                  |                  |                                                                                                                                                           |                                      |                          |          |                         |
|-----------------|------------------------------------|--------------------------|---|-------|-----|----------------------------------------------------------------------------------------------------------------------------------------------------------------------------------------------------------------------------------|------------------|-----------------------------------------------------------------------------------------------------------------------------------------------------------|--------------------------------------|--------------------------|----------|-------------------------|
| Zhang 2017 (95) | Percutaneous coronary intervention | All-cause mortality      | 5 | 4,499 | 353 | Male (73-77.5%) and female population with CHD / without: acute MI (4x) / with or without: metabolic disease and hypertension, prior MI (6.7-33%), current smokers: 20.8-27.7%                                                   | 61.3-66.2 (mean) | Percutaneous coronary intervention / stent types: bare metal stent or early-generation drug eluting stent (3x); second-generation drug eluting stent (2x) | Coronary artery bypass graft surgery | All-cause mortality      | Parallel | 3-10 years (range)      |
| Zhang 2017 (95) | Percutaneous coronary intervention | Cardiovascular mortality | 4 | 4,394 | 185 | Male (76-77.5%) and female population with CHD / without: acute MI (3x) / with or without: metabolic disease and hypertension, prior MI (6.7-25.4%); current smokers: 20.8-27.7%                                                 | 62.7-66.2 (mean) | Percutaneous coronary intervention / stent types: bare metal stent or early-generation drug eluting stent (2x); second-generation drug eluting stent (2x) | Coronary artery bypass graft surgery | Cardiovascular mortality | Parallel | 3-5 years (range)       |
| Zhang 2017 (95) | Percutaneous coronary intervention | Myocardial infarction    | 5 | 4,499 | 254 | Male (73-77.5%) and female population with CHD / without: acute MI (4x) / with or without: metabolic disease and hypertension, prior MI (6.7-33%), current smokers: 20.8-27.7%                                                   | 61.3-66.2 (mean) | Percutaneous coronary intervention / stent types: bare metal stent or early-generation drug eluting stent (3x); second-generation drug eluting stent (2x) | Coronary artery bypass graft surgery | Myocardial infarction    | Parallel | 3-10 years (range)      |
| Ziff 2015 (96)  | Digoxin                            | All-cause mortality      | 7 | 8,406 | NR  | Population with chronic heart failure of different degrees (NYHA II-IV) / including different etiologies for heart failure / with: reduced or preserved left ventricular ejection fraction / mostly without: atrial fibrillation | 57-67 (mean)     | Digoxin                                                                                                                                                   | Placebo                              | All-cause mortality      | Parallel | 3-37 months follow-up   |
| Ziff 2015 (96)  | Digoxin                            | Cardiovascular mortality | 5 | 8,068 | NR  | Population with chronic heart failure of different degrees (NYHA II-IV) / including different etiologies for heart failure / with: reduced or preserved left ventricular ejection fraction / mostly without: atrial fibrillation | 60-67 (mean)     | Digoxin                                                                                                                                                   | Placebo                              | Cardiovascular mortality | Parallel | 3-37 months (follow-up) |



|                |         |                    |   |       |    |                                                                                                                                                              |              |         |         |                              |          |                       |
|----------------|---------|--------------------|---|-------|----|--------------------------------------------------------------------------------------------------------------------------------------------------------------|--------------|---------|---------|------------------------------|----------|-----------------------|
| Ziff 2015 (96) | Digoxin | Hospital admission | 2 | 7,778 | NR | Population with different degrees of chronic heart failure (NYHA II-IV) / with reduced or preserved left ventricular ejection fraction / all in sinus rhythm | 63-67 (mean) | Digoxin | Placebo | All-cause hospital admission | Parallel | 37 months (follow-up) |
|----------------|---------|--------------------|---|-------|----|--------------------------------------------------------------------------------------------------------------------------------------------------------------|--------------|---------|---------|------------------------------|----------|-----------------------|

ACS= acute coronary syndrome; AIDS= acquired immune deficiency syndrome; ART= antiretroviral therapy; ASA= american society of anesthesiologists; BCG= bacillus calmette-guérin; BMI= body mass index; CABG= coronary artery bypass graft; CAD= coronary artery disease; CD4= cluster of differentiation 4; CHD= coronary heart disease; COPD= chronic obstructive pulmonary disease; CVD= cardiovascular disease; DDP-4= dipeptidyl peptidase 4; DTP= diphtheria, tetanus, pertussis; eGFR= estimated glomerular filtration rate; GDM= gestational diabetes mellitus; HbA1c= hemoglobin A1c; HIV= human immunodeficiency virus; HSV-2= herpes simplex virus type 2; ICU= intensive care unit; MI= myocardial infarction; MRI= magnetic resonance imaging; MRSA= methicillin resistant staphylococcus aureus; MSSA= methicillin sensitive staphylococcus aureus; NA= not applicable; NOS= newcastle-ottawa scale; NR= not reported; NSAID= non-steroidal anti-inflammatory drug; NSTEMI= non-ST elevation acute coronary syndrome; NYHA= new york heart association (stage); PCI= percutaneous coronary intervention; PPV= pneumococcal polysaccharide vaccine; SGLT-2= sodium glucose transporter 2; SPMSQ= short portable mental status questionnaire; STAT= instantly; STEMI= ST elevation myocardial infarction;  $\mu$ L= microliter WHO= world health organization // units: g= gram; IU= international units; kcal= kilocalorie; kg= kilogram; L= liter; mg= milligram; mL= milliliter; mmol= millimol;  $\mu$ g= microgram;  $\mu$ L= microliter // application routes: IM= intramuscular; IV= intravenous; P.O.= per os; SC= subcutaneous.

**Table S5. Certainty of the evidence and risk of bias for included bodies of evidence from randomized controlled trials**

| Reference/ year      | Intervention              | Outcome                          | Certainty/ strength of the evidence | Tool        | risk of bias tool | Reported as number of low risk of bias studies per domain                                                                                                                                                                                                                          |
|----------------------|---------------------------|----------------------------------|-------------------------------------|-------------|-------------------|------------------------------------------------------------------------------------------------------------------------------------------------------------------------------------------------------------------------------------------------------------------------------------|
| Abou-Setta 2011 (74) | Nerve block               | Delirium                         | Moderate (RCTs and cohort studies)  | AHRQ/ GRADE | Cochrane          | Random sequence generation (3/4), allocation concealment (3/4), Blinding (2/4), incomplete outcome data (2/4) selective reporting (4/4); other bias (2/4)                                                                                                                          |
| Abou-Setta 2011 (74) | Spinal anesthesia         | All-cause mortality              | Low (RCTs and cohort studies)       | AHRQ/ GRADE | Cochrane          | Random sequence generation (0/2), allocation concealment (0/2), blinding (1/2), incomplete outcome data (1/2) selective reporting (2/2); other bias (0/2)                                                                                                                          |
| Aburto 2013 (75)     | Low sodium                | All-cause mortality              | Moderate                            | GRADE       | Cochrane          | Random sequence generation (1/4), allocation concealment (3/4), blinding (3/4), incomplete outcome data (3/4), selective reporting (4/4), assessment of compliance? (4/4), groups balanced at baseline? (4/4), intention to treat analysis? (4/4), free from follow up bias? (1/4) |
| Aburto 2013 (75)     | Low sodium                | Cardiovascular disease           | Moderate                            | GRADE       | Cochrane          | Random sequence generation (1/2), allocation concealment (1/2), blinding (0/2), incomplete outcome data (1/2), selective reporting (1/2), assessment of compliance? (2/2), groups balanced at baseline? (2/2), intention to treat analysis? (2/2), free from follow up bias? (0/2) |
| Ahmad 2015 (27)      | Intra-aortic balloon pump | All-cause mortality              | NR                                  | NA          | Cochrane          | Random sequence generation (descriptively rated), allocation concealment (0/12), blinding of participants and personnel (0/12), blinding of outcome assessments (descriptively rated), incomplete outcome data (descriptively rated), selective reporting (descriptively rated)    |
| Alexander 2017 (76)  | DHA and EPA               | Coronary heart disease           | NR                                  | NA          | Cochrane          | Random sequence generation (10/18), allocation concealment (12/18), blinding of personnel and participants (14/18), blinding of outcome assessment (16/18), incomplete outcome data (17/18), selective reporting (18/18), other bias (15/18)                                       |
| Alexander 2017 (76)  | DHA and EPA               | Coronary heart disease mortality | NR                                  | NA          | Cochrane          | Random sequence generation (9/14), allocation concealment (9/14), blinding of personnel and participants (10/14), blinding of outcome assessment (13/14), incomplete outcome data (14/14) selective reporting (14/14), other bias (12/14)                                          |
| Alexander 2017 (76)  | DHA and EPA               | Coronary heart disease incidence | NR                                  | NA          | Cochrane          | Random sequence generation (7/9), allocation concealment (6/9), blinding of personnel and participants (6/9), blinding of outcome assessment (8/9), incomplete outcome data (8/9), selective reporting (9/9), other bias (8/9)                                                     |

|                            |                                          |                                    |                                           |       |          |                                                                                                                                                                                                                                              |
|----------------------------|------------------------------------------|------------------------------------|-------------------------------------------|-------|----------|----------------------------------------------------------------------------------------------------------------------------------------------------------------------------------------------------------------------------------------------|
| Alipanah 2018 (24)         | Self-administered therapy                | Low treatment success              | NR                                        | NA    | Cochrane | Random sequence generation (4/4), allocation concealment (4/4), blinding of personnel and participants (0/4), blinding of outcome (0/4), incomplete outcome data (1/4), selective reporting (4/4)                                            |
| Alipanah 2018 (24)         | Self-administered therapy                | Low treatment completion           | NR                                        | NA    | Cochrane | Random sequence generation (4/5), allocation concealment (3/5), blinding of personnel and participants (0/5), blinding of outcome (0/5), incomplete outcome data (2/5), selective reporting (4/5)                                            |
| Alipanah 2018 (24)         | Self-administered therapy                | All-cause mortality                | NR                                        | NA    | Cochrane | Random sequence generation (4/4), allocation concealment (3/4), blinding of personnel and participants (0/4), blinding of outcome (0/4), incomplete outcome data (1/4), selective reporting (4/4)                                            |
| Anglemyer 2013 (77)        | Antiretroviral therapy                   | HIV infection                      | High (virologically linked-HIV infection) | GRADE | Cochrane | Random sequence generation (1/1), allocation concealment (0/1), blinding (performance bias and detection bias) (0/1), incomplete outcome data (1/1), selective reporting (1/1), other bias (1/1)                                             |
| Azad 2017 (21)             | Nonnutritive sweeteners                  | Body Mass Index                    | NR                                        | NA    | Cochrane | Random sequence generation (3/3), allocation concealment (3/3), blinding (2/3), incomplete outcome data (2/3), selective reporting (2/3), other bias (3/3)/ overall: low risk of bias (1/3)                                                  |
| Barnard 2015 (28)          | Surgical abortion by mid-level providers | Failure or incomplete abortion     | Low                                       | GRADE | Cochrane | Random sequence generation (2/2), allocation concealment (2/2), blinding of participants and personnel (2/2), blinding of outcome assessment (0/2), incomplete outcome data, all outcomes (2/2), selective reporting (0/2), other bias (0/2) |
| Barnard 2015 (28)          | Surgical abortion by mid-level providers | Complications                      | Low                                       | GRADE | Cochrane | Random sequence generation (2/2), allocation concealment (2/2), blinding of participants and personnel (2/2), blinding of outcome assessment (0/2), incomplete outcome data, all outcomes (2/2), selective reporting (0/2), other bias (0/2) |
| Barnard 2015 (28)          | Surgical abortion by mid-level providers | Abortion failure and complications | Low                                       | GRADE | Cochrane | Random sequence generation (2/2), allocation concealment (2/2), blinding of participants and personnel (2/2), blinding of outcome assessment (0/2), incomplete outcome data, all outcomes (2/2), selective reporting (0/2), other bias (0/2) |
| Bellemain-Appaix 2012 (48) | Clopidogrel                              | All-cause mortality                | NR                                        | NA    | JADAD    | Randomization (6/6), double-blinding (4/6), withdrawals/ dropouts description (6/6); one RCT (Davlouros 2009) rated with NOS without a reason given                                                                                          |

|                            |                    |                                  |                               |           |          |                                                                                                                                                                                                                                                                                                                                                                         |
|----------------------------|--------------------|----------------------------------|-------------------------------|-----------|----------|-------------------------------------------------------------------------------------------------------------------------------------------------------------------------------------------------------------------------------------------------------------------------------------------------------------------------------------------------------------------------|
| Bellemain-Appaix 2012 (48) | Clopidogrel        | Major bleeding                   | NR                            | NA        | JADAD    | Randomization (6/6), double-blinding (4/6), withdrawals/ dropouts description (6/6); one RCT (Davlouros 2009) rated with NOS without a reason given                                                                                                                                                                                                                     |
| Bellemain-Appaix 2012 (48) | Clopidogrel        | Coronary heart disease           | NR                            | NA        | JADAD    | Randomization (6/6), double-blinding (4/6), withdrawals/ dropouts description (6/6); one RCT (Davlouros 2009) rated with NOS without a reason given                                                                                                                                                                                                                     |
| Bellemain-Appaix 2014 (47) | P2Y12 inhibitors   | All-cause mortality              | NR                            | NA        | Cochrane | Random sequence generation (3/3), allocation concealment (3/3), blinding of participants and personnel (3/3), blinding of outcome assessment (3/3), incomplete outcome data(3/3), selective reporting (death, MACE, bleeding outcomes) (3/3), selective reporting (stent thrombosis) (1/3)                                                                              |
| Bellemain-Appaix 2014 (47) | P2Y12 inhibitors   | Major bleeding                   | NR                            | NA        | Cochrane | Random sequence generation (3/3), allocation concealment (3/3), blinding of participants and personnel(3/3), blinding of outcome assessment (3/3), incomplete outcome data (3/3), selective reporting (death, MACE, bleeding outcomes) (3/3), selective reporting (stent thrombosis) (1/3)                                                                              |
| Bellemain-Appaix 2014 (47) | P2Y12 inhibitors   | Main composite ischemic endpoint | NR                            | NA        | Cochrane | Random sequence generation (3/3), allocation concealment (3/3), blinding of participants and personnel (3/3), blinding of outcome assessment (3/3), incomplete outcome data (3/3), selective reporting (death, MACE, bleeding outcomes) (3/3), selective reporting (stent thrombosis) (1/3)                                                                             |
| Bloomfield 2016 (22)       | Mediterranean diet | Breast cancer                    | Low (RCTs and cohort studies) | AHRQ 2010 | Cochrane | Random sequence generation (1/1), allocation concealment (1/1), blinding (1/1), incomplete outcome data (1/1), selective outcome reporting (1/1)/ overall: low risk of bias (1/1)                                                                                                                                                                                       |
| Bolland 2015 (49)          | Calcium            | All fractures                    | NR                            | NA        | Cochrane | Yes/ no answers, number in brackets is number of trials with "yes"; random sequence generation described (9/22), allocation concealment (9/22), number of double-blind trials (14/22), blinding of outcome assessment (17/22), incomplete outcome data (3/22), differential drop-out (yes or not specified) (3/22), other bias (7/22)/ overall: low risk of bias (4/22) |
| Bolland 2015 (49)          | Calcium            | Vertebral fracture               | NR                            | NA        | Cochrane | Yes/ no answers, number in brackets is number of trials with "yes"; random sequence generation described (4/12), allocation concealment (3/12), number of double-blind trials (9/12), blinding of outcome assessment (11/12), incomplete outcome data (4/12), differential drop-out (yes or not specified) (1/12), other bias (2/12)/ overall: low risk of bias (4/12)  |
| Bolland 2015 (49)          | Calcium            | Hip fracture                     | NR                            | NA        | Cochrane | Yes/ no answers, number in brackets is number of trials with "yes"; random sequence generation described (7/13), allocation concealment (6/13), number of double-blind trials (8/13), blinding of outcome assessment (9/13), incomplete outcome data (2/13), differential drop-out (yes or not specified) (2/13), other bias (5/13)/ overall: low risk of bias (3/12)   |

|                      |                          |                             |    |    |                                                               |                                                                                                                                                                                                                                               |
|----------------------|--------------------------|-----------------------------|----|----|---------------------------------------------------------------|-----------------------------------------------------------------------------------------------------------------------------------------------------------------------------------------------------------------------------------------------|
| Brenner 2014 (29)    | Sigmoidoscopy            | Colorectal cancer mortality | NR | NA | Individual tool                                               | 8.5/9 (Mean number of quality criteria met)                                                                                                                                                                                                   |
| Brenner 2014 (29)    | Sigmoidoscopy            | Colorectal cancer incidence | NR | NA | Individual tool                                               | 8.5/9 (Mean number of quality criteria met)                                                                                                                                                                                                   |
| Chowdhury 2012 (78)  | Omega-3                  | Cerebrovascular disease     | NR | NA | Individual tool based on MOOSE, QUATSO, and STROBE guidelines | Modified quality score (for RCTs and cohort studies) (0-6, 6 is best): average 5.5                                                                                                                                                            |
| Chowdhury 2014a (79) | $\alpha$ -linolenic acid | Coronary heart disease      | NR | NA | Cochrane                                                      | Random sequence generation (4/4), allocation concealment (4/4), blinding of participants and personnel (3/4), blinding of outcome assessments (3/4), incomplete outcome data (4/4), selective reporting (3/4), other bias (3/4)               |
| Chowdhury 2014a (79) | Omega-3                  | Coronary heart disease      | NR | NA | Cochrane                                                      | Random sequence generation (17/17), allocation concealment (16/17), blinding of participants and personnel (14/17), blinding of outcome assessments (14/17), incomplete outcome data (17/17), selective reporting (17/17), other bias (13/17) |
| Chowdhury 2014a (79) | Omega-6                  | Coronary heart disease      | NR | NA | Cochrane                                                      | Random sequence generation (8/8), allocation concealment (8/8), blinding of participants and personnel (4/8), blinding of outcome assessments (5/8), incomplete outcome data (8/8), selective reporting (6/8), other bias (4/8)               |
| Chowdhury 2014b (80) | Vitamin D                | All-cause mortality         | NR | NA | Cochrane                                                      | Random sequence generation (22/22), allocation concealment (20/22), blinding of personnel and participants (18/22), blinding of outcome assessment (8/22), incomplete outcome data (12/22), selective reporting (22/22), other bias (10/22)   |
| Chung 2011 (58)      | Vitamin D                | Colorectal cancer           | NR | NA | AHRQ/ CONSORT                                                 | Fair quality (1/1)                                                                                                                                                                                                                            |
| Chung 2011 (58)      | Vitamin D                | Breast cancer               | NR | NA | AHRQ/ CONSORT                                                 | Fair quality (1/1)                                                                                                                                                                                                                            |

|                     |                                           |                                                      |                                    |             |                 |                                                                                                                                                                                                                                                                                              |
|---------------------|-------------------------------------------|------------------------------------------------------|------------------------------------|-------------|-----------------|----------------------------------------------------------------------------------------------------------------------------------------------------------------------------------------------------------------------------------------------------------------------------------------------|
| Chung 2016 (56)     | Calcium                                   | Cardiovascular mortality                             | NR                                 | NA          | AHRQ/ CONSORT   | Appropriate randomization technique (2/2), allocation concealment (2/2), dropout rate <20% (2/2), blinded outcome assessment (1/2), intention to-treat analysis (2/2), appropriate statistical analysis (2/2), assessment for confounding (2/2), clear reporting with no discrepancies (2/2) |
| Ding 2017 (81)      | Dairy                                     | Systolic blood pressure                              | NR                                 | NA          | NA              | NR                                                                                                                                                                                                                                                                                           |
| Fenton 2018 (30)    | Radiation therapy                         | Erectile dysfunction                                 | Moderate (RCTs and cohort studies) | AHRQ/ GRADE | AHRQ/ USPSTF    | Good quality (1/1)                                                                                                                                                                                                                                                                           |
| Fenton 2018 (30)    | Radical Prostatectomy                     | Urinary incontinence                                 | Moderate (RCTs and cohort studies) | AHRQ/ GRADE | AHRQ/ USPSTF    | Good quality (3/3)                                                                                                                                                                                                                                                                           |
| Fenton 2018 (30)    | Radical Prostatectomy                     | Erectile dysfunction                                 | Moderate (RCTs and cohort studies) | AHRQ/ GRADE | AHRQ/ USPSTF    | Good quality (3/3)                                                                                                                                                                                                                                                                           |
| Filippini 2017 (43) | Disease-modifying drugs                   | Conversion to clinically definite multiple sclerosis | NR                                 | NA          | Cochrane        | Random sequence generation (7/7), allocation concealment (4/7), other major baseline imbalance (7/7), blinding of personnel and participants (0/7), blinding of outcome assessment (3/7), incomplete outcome data (3/7), selective reporting (6/7)                                           |
| Fluri 2010 (31)     | Extracranial-intracranial arterial bypass | All-cause mortality                                  | NR                                 | NA          | Individual tool | Adequate allocation concealment (2/2)                                                                                                                                                                                                                                                        |
| Fluri 2010 (31)     | Extracranial-intracranial arterial bypass | Stroke                                               | NR                                 | NA          | Individual tool | Adequate allocation concealment (2/2)                                                                                                                                                                                                                                                        |
| Fluri 2010 (31)     | Extracranial-intracranial arterial bypass | Stroke mortality or dependency                       | NR                                 | NA          | Individual tool | Adequate allocation concealment (1/1)                                                                                                                                                                                                                                                        |

|                     |                                        |                                   |          |             |                 |                                                                                                                                                                                                                                                                             |
|---------------------|----------------------------------------|-----------------------------------|----------|-------------|-----------------|-----------------------------------------------------------------------------------------------------------------------------------------------------------------------------------------------------------------------------------------------------------------------------|
| Gargiulo 2016 (32)  | Transcatheter aortic valve             | Early all-cause mortality         | NR       | NA          | Cochrane        | Random sequence generation (5/5), allocation concealment (5/5), blinding of personnel and participants (0/5), blinding of outcome assessment (5/5), incomplete outcome data (5/5), selective reporting (5/5), other bias (4/5)                                              |
| Gargiulo 2016 (32)  | Transcatheter aortic valve             | Mid-term all-cause mortality      | NR       | NA          | Cochrane        | Random sequence generation (5/5), allocation concealment (5/5), blinding of personnel and participants (0/5), blinding of outcome assessment (5/5), incomplete outcome data (5/5), selective reporting (5/5), other bias (4/5)                                              |
| Gargiulo 2016 (32)  | Transcatheter aortic valve             | Long-term all-cause mortality     | NR       | NA          | Cochrane        | Random sequence generation (4/4), allocation concealment (4/4), blinding of personnel and participants (0/4), blinding of outcome assessment (4/4), incomplete outcome data (4/4), selective reporting (4/4), other bias (4/4)                                              |
| Hartling 2013 (50)  | Treating gestational diabetes mellitus | High birth weight                 | Moderate | AHRQ/ GRADE | Cochrane        | Random sequence generation (2/5), allocation concealment (1/5), blinding of personnel and participants (2/5), blinding of outcome assessment (4/5), incomplete outcome data (3/5), selective reporting (5/5), other bias (5/5)/ overall: good (1/5), fair (3/5), poor (1/5) |
| Hartling 2013 (50)  | Treating gestational diabetes mellitus | Large-for-gestational age neonate | NR       | NA          | Cochrane        | Random sequence generation (2/3), allocation concealment (1/3), blinding of personnel and participants (2/3), blinding of outcome assessment (3/3), incomplete outcome data (3/3), selective reporting (3/3), other bias (3/3)/ overall: good (1/3), fair (2/3)             |
| Hartling 2013 (50)  | Treating gestational diabetes mellitus | Shoulder dystocia                 | Moderate | AHRQ/ GRADE | Cochrane        | Random sequence generation (1/3), allocation concealment (1/3), blinding of personnel and participants (2/3), blinding of outcome assessment (3/3), incomplete outcome data (2/3), selective reporting (3/3), other bias (3/3)/ overall: good (1/3), fair (2/3)             |
| Henderson 2019 (51) | Treating asymptomatic bacteriuria      | Pyelonephritis                    | Moderate | AHRQ/ GRADE | USPSTF criteria | Fair quality (12/12)                                                                                                                                                                                                                                                        |
| Higgins 2016 (25)   | Bacillus Calmette-Guérin               | All-cause mortality               | NR       | NA          | Cochrane        | Risk of bias due to confounding (2/3), risk of performance bias (2/3), detection bias (3/3), attrition bias(3/3), bias in selection (0/3)/ overall risk: moderate (1/3), low (2/3)                                                                                          |
| Higgins 2016 (25)   | Measles containing vaccines            | All-cause mortality               | NR       | NA          | Cochrane        | Confounding (1/4), performance bias (1/4), detection bias (3/4), attrition bias (0/4), selection bias (0/4)/ overall: moderate risk (3/4)                                                                                                                                   |

|                     |                                                      |                        |    |    |                                                             |                                                                                                                                                                                                                     |
|---------------------|------------------------------------------------------|------------------------|----|----|-------------------------------------------------------------|---------------------------------------------------------------------------------------------------------------------------------------------------------------------------------------------------------------------|
| Hopley 2010 (33)    | Total hip arthroplasty                               | Reoperation            | NR | NA | Special criteria for study topic according to Parker et al. | Average number of quality criteria from rating scale met: 7.3                                                                                                                                                       |
| Hopley 2010 (33)    | Total hip arthroplasty                               | Dislocation            | NR | NA | Special criteria for study topic according to Parker et al. | Average number of quality criteria from rating scale met: 7.3                                                                                                                                                       |
| Hopley 2010 (33)    | Total hip arthroplasty                               | Deep infection         | NR | NA | Special criteria for study topic according to Parker et al. | Average number of quality criteria from rating scale met: 7.3                                                                                                                                                       |
| Hüpfel 2010 (67)    | Chest-compression-only cardiopulmonary resuscitation | All-cause mortality    | NR | NA | NR                                                          | High quality (3/3)                                                                                                                                                                                                  |
| Jamal 2013 (82)     | Non-calcium-based phosphat binders                   | All-cause mortality    | NR | NA | Cochrane                                                    | Number of studies with low risk of bias in all domains (4/8), high risk of bias (2/8), unclear risk of bias (2/8)/ results of domains not reported                                                                  |
| Jefferson 2010 (46) | Parenteral influenza vaccine                         | Influenza-like illness | NR | NA | Cochrane (incomplete)                                       | Allocation concealment adequate (2/4)                                                                                                                                                                               |
| Jefferson 2010 (46) | Parenteral influenza vaccine                         | Influenza              | NR | NA | Cochrane (incomplete)                                       | Allocation concealment adequate (1/3)                                                                                                                                                                               |
| Jefferson 2012 (34) | Inactivated influenza vaccines                       | Influenza              | NR | NA | Cochrane                                                    | Random sequence generation (2/5), allocation concealment (2/5), blinding of participants and personnel (3/5), detection bias (3/5), incomplete outcome data (3/5)/ summary (overall assessment) (2/5)               |
| Jefferson 2012 (34) | Inactivated influenza vaccines                       | Influenza-like illness | NR | NA | Cochrane                                                    | Random sequence generation (2/5), allocation concealment (1/5), blinding (performance bias and detection bias), all outcomes (3/5), incomplete outcome data, all outcomes (3/5)/ summary (overall assessment) (1/5) |



|                     |                                                 |                          |          |       |                    |                                                                                                                                                                                                                                                                                                          |
|---------------------|-------------------------------------------------|--------------------------|----------|-------|--------------------|----------------------------------------------------------------------------------------------------------------------------------------------------------------------------------------------------------------------------------------------------------------------------------------------------------|
| Jin 2012 (83)       | Total flavonoids                                | Colorectal neoplasms     | NR       | NA    | Cochrane           | Random sequence generation (0/1), allocation concealment (0/1), blinding of personnel and participants (0/1), blinding of outcome assessment (0/1), incomplete outcome data (0/1), selective reporting (0/1), other bias (1/1)                                                                           |
| Johnston 2019 (23)  | Low red meat                                    | All-cause mortality      | Low      | GRADE | Cochrane           | Randomization sequence adequately generated (1/1), allocation adequately concealed (1/1), blinding of participants (0/1), blinding of data collectors (1/1), blinding of outcome assessors or adjudicators (1/1), loss to follow-up (missing outcome data) (1/1), reporting bias (1/1), other bias (1/1) |
| Johnston 2019 (23)  | Low red meat                                    | Cardiovascular mortality | Very low | GRADE | Cochrane           | Randomization sequence adequately generated (1/1), allocation adequately concealed (1/1), blinding of participants (0/1), blinding of data collectors (1/1), blinding of outcome assessors or adjudicators (1/1), loss to follow-up (missing outcome data) (0/1), reporting bias (1/1), other bias (1/1) |
| Johnston 2019 (23)  | Low red meat                                    | Cardiovascular disease   | Low      | GRADE | Cochrane           | Randomization sequence adequately generated (1/1), allocation adequately concealed (1/1), blinding of participants (0/1), blinding of data collectors (0/1), blinding of outcome assessors or adjudicators (1/1), loss to follow-up (missing outcome data) (1/1), reporting bias (1/1), other bias (1/1) |
| Kansagara 2013 (52) | Transfusion                                     | All-cause mortality      | Low      | GRADE | Cochrane           | Random sequence generation (3/6), allocation concealment (4/6), blinding of personnel and participants and outcome assessors (not convertible from SR), incomplete outcome data (6/6), selective reporting (6/6), other bias (not convertible from SR)/ overall low risk of bias: (6/6)                  |
| Keag 2018 (84)      | Caesarean section                               | Urinary incontinence     | NR       | NA    | SIGN               | Study quality: ++ (0,+ or ++)                                                                                                                                                                                                                                                                            |
| Keag 2018 (84)      | Caesarean section                               | Fecal incontinence       | NR       | NA    | SIGN               | Study quality: ++ (0,+ or ++)                                                                                                                                                                                                                                                                            |
| Kredo 2014 (85)     | Starting and maintaining antiretroviral therapy | All-cause mortality      | High     | GRADE | Cochrane, modified | Baseline CD4 count (1/1), other baseline variables (0/1), co-interventions (1/1), random sequence generation (1/1), allocation concealment (1/1), contamination protection (0/1)                                                                                                                         |
| Kredo 2014 (85)     | Starting and maintaining antiretroviral therapy | Attrition                | Moderate | GRADE | Cochrane, modified | Baseline CD4 count (1/1), other baseline variables (0/1), co-interventions (1/1), random sequence generation (1/1), allocation concealment (1/1), contamination protection (0/1)                                                                                                                         |

|                      |                                      |                                      |                                    |       |                    |                                                                                                                                                                                                                                                                                                                                                     |
|----------------------|--------------------------------------|--------------------------------------|------------------------------------|-------|--------------------|-----------------------------------------------------------------------------------------------------------------------------------------------------------------------------------------------------------------------------------------------------------------------------------------------------------------------------------------------------|
| Kredo 2014 (85)      | Maintaining antiretroviral therapy   | All-cause mortality                  | Moderate                           | GRADE | Cochrane, modified | Baseline CD4 count (2/2), other baseline variables (1/2), co-interventions (2/2), random sequence generation (2/2), allocation concealment (2/2), contamination protection (1/2)                                                                                                                                                                    |
| Li 2014 (54)         | Exenatide                            | Acute pancreatitis                   | NR                                 | NA    | Cochrane, modified | Random sequence generation (4/5), allocation concealment (4/5), blinding of participants and personnel (1/5), blinded assessment of pancreatitis events (1/5), adjudication of pancreatitis events (0/5)                                                                                                                                            |
| Li 2016 (53)         | DDP-4 inhibitors                     | Heart failure                        | Low                                | GRADE | Cochrane, modified | Randomization sequence generation (16/34), allocation concealment (11/34), blinding of participants and personnel (34/34), blinded assessment HF or HF-hospital admission events (34/34), HF or HF-hospital admission outcome adjudicated (6/34), blinded HF or HF-hospital admission outcome adjudication (3/34), industry funded (34/34)          |
| Li 2016 (53)         | DDP-4 inhibitors                     | Hospital admission for heart failure | Moderate                           | GRADE | Cochrane, modified | Randomization sequence generation (2/5), allocation concealment (2/5), blinding of participants and personnel (4/5), blinded assessment HF or HF-hospital admission events (4/5), HF or HF-hospital admission outcome adjudicated (yes: (5/5)), blinded HF or HF-hospital admission outcome adjudication (yes: (3/5)), industry funded (yes: (5/5)) |
| Matthews 2018 (86)   | Tamoxifen                            | Heart failure                        | NR                                 | NA    | Cochrane           | Random sequence generation (1/1), allocation concealment (1/1), blinding (0/1), incomplete outcome data (0/1), selective reporting (0/1), other sources of bias (1/1)                                                                                                                                                                               |
| Menne 2019 (87)      | SGLT-2 inhibitors                    | Acute kidney injury                  | NR                                 | NA    | Cochrane           | Random sequence generation (32/41), allocation concealment (32/41), blinding of participants and personnel (36/41), detection bias (blinding of outcome assessment) (29/41), incomplete outcome data serious adverse events (34/41), incomplete outcome data non-serious adverse events (14/41), selective reporting (37/41)                        |
| Mesgarpour 2017 (88) | Erythropoiesis stimulating agents    | Venous thromboembolism               | Very low (RCTs and cohort studies) | GRADE | Cochrane           | Random sequence generation (9/12), allocation concealment (6/12), blinding of personnel and participants (10/12), blinding of outcome assessment (6/12), incomplete outcome data (7/12), selective reporting (10/12), other bias (3/12)                                                                                                             |
| Mesgarpour 2017 (88) | Erythropoiesis stimulating agents    | All-cause mortality                  | Low (RCTs and cohort studies)      | GRADE | Cochrane           | Random sequence generation (10/17), allocation concealment (6/17), blinding of personnel and participants (12/17), blinding of outcome assessment (9/17), incomplete outcome data (12/17), selective reporting (10/17), other bias (2/17)                                                                                                           |
| Moberley 2013 (89)   | Pneumococcal polysaccharide vaccines | Invasive pneumococcal disease        | NR                                 | NA    | Cochrane           | Random sequence generation (4/10), allocation concealment (5/10), blinding of participants and personnel (6/10), detection bias (blinding of outcome assessment) (6/10), incomplete outcome data (1/10), selective reporting (1/10)                                                                                                                 |

|                         |                                                        |                                      |    |    |                                                                                                                       |                                                                                                                                                                                                                                                                                                               |
|-------------------------|--------------------------------------------------------|--------------------------------------|----|----|-----------------------------------------------------------------------------------------------------------------------|---------------------------------------------------------------------------------------------------------------------------------------------------------------------------------------------------------------------------------------------------------------------------------------------------------------|
| Molnar 2015 (35)        | Neoral (Cyclosporin)                                   | Acute rejection of kidney transplant | NR | NA | Cochrane                                                                                                              | Random sequence generation (1/2), allocation concealment (1/2), blinding of participants and personnel (1/2), blinding of outcome assessment (0/2), incomplete outcome data (clinical outcomes) (2/2), selective reporting (2/2), other bias (0/2)                                                            |
| Navarese 2013 (90)      | Early intervention for NSTEMI-ACS                      | All-cause mortality                  | NR | NA | Cochrane                                                                                                              | Number of trials with answer "Yes": adequate sequence generation? (5/7), allocation concealment? (5/7), patient blinding? (0/7), physician blinding? (0/7), adjudication of outcomes blinding? (6/7), incomplete data outcome addressed? (7/7), selective outcome reporting? (0/7), free of other Bias? (7/7) |
| Navarese 2013 (90)      | Early intervention for NSTEMI-ACS                      | Myocardial infarction                | NR | NA | Cochrane                                                                                                              | Number of trials with answer "Yes": adequate sequence generation? (5/7), allocation concealment? (5/7), patient blinding? (0/7), physician blinding? (0/7), adjudication of outcomes blinding? (6/7), incomplete data outcome addressed? (7/7), selective outcome reporting? (0/7), free of other bias? (7/7) |
| Navarese 2013 (90)      | Early intervention for NSTEMI-ACS                      | Major bleeding                       | NR | NA | Cochrane                                                                                                              | Number of trials with answer "Yes": adequate sequence generation? (5/7), allocation concealment? (5/7), patient blinding? (0/7), physician blinding? (0/7), adjudication of outcomes blinding? (6/7), incomplete data outcome addressed? (7/7), selective outcome reporting? (0/7), free of other bias? (7/7) |
| Nelson 2010 (36)        | Caesarean section                                      | Anal incontinence, feces             | NR | NA | NA                                                                                                                    | NR                                                                                                                                                                                                                                                                                                            |
| Nelson 2010 (36)        | Caesarean section                                      | Anal incontinence, flatus            | NR | NA | NA                                                                                                                    | NR                                                                                                                                                                                                                                                                                                            |
| Nieuwenhuijse 2014 (37) | Ceramic-on-ceramic bearings for total hip arthroplasty | Harris Hip Score                     | NR | NA | Modified rating tool based on Cochrane and CONSORT criteria; partly with verbal ratings, overall: low to high quality | High quality: (1/7)                                                                                                                                                                                                                                                                                           |
| Nieuwenhuijse 2014 (37) | High-flexion total knee arthroplasty                   | Flexion                              | NR | NA | Modified rating tool based on Cochrane and CONSORT criteria; partly with verbal ratings, overall: low to high quality | High quality: (7/20)                                                                                                                                                                                                                                                                                          |
| Nieuwenhuijse 2014 (37) | Gender-specific total knee arthroplasty                | Flexion-extension range              | NR | NA | Modified rating tool based on Cochrane and CONSORT criteria; partly with                                              | High quality: (1/6)                                                                                                                                                                                                                                                                                           |

|                   |                                     |                       |              |             | verbal ratings,<br>overall: low to high<br>quality |                                                                                                                                                                                                                                                                                                                                                                |
|-------------------|-------------------------------------|-----------------------|--------------|-------------|----------------------------------------------------|----------------------------------------------------------------------------------------------------------------------------------------------------------------------------------------------------------------------------------------------------------------------------------------------------------------------------------------------------------------|
| Nikooie 2019 (55) | Second generation antipsychotics    | Sedation              | Moderate     | AHRQ        | Cochrane                                           | Random sequence generation (5/6), allocation concealment (2/6), blinding of personnel, participants and blinding of outcome assessment (3/6), incomplete outcome data (3/6), selective reporting (3/6), other bias (1/6)/ overall: low risk of bias (3/6)                                                                                                      |
| Nikooie 2019 (55) | Second generation antipsychotics    | Neurologic outcomes   | NR           | NA          | Cochrane                                           | Random sequence generation (5/6), allocation concealment (3/6), blinding of personnel, participants and blinding of outcome assessment (4/6), incomplete outcome data (4/6), selective reporting (4/6), other bias (2/6)/ overall: low risk of bias (4/6)                                                                                                      |
| Ochen 2019 (91)   | Surgery for achilles tendon rupture | Re-rupture            | NR           | NA          | MINORS                                             | MINORS score: 20.3 (mean)/ 16-23 (range)                                                                                                                                                                                                                                                                                                                       |
| Ochen 2019 (91)   | Surgery for achilles tendon rupture | Complications         | NR           | NA          | MINORS                                             | MINORS score: 20.4 (mean)/ 16-23 (range)                                                                                                                                                                                                                                                                                                                       |
| Pittas 2010 (60)  | Vitamin D                           | Hypertension          | NR           | NA          | AHRQ/ CONSORT                                      | Good quality (1/1)                                                                                                                                                                                                                                                                                                                                             |
| Raman 2013 (38)   | Carotid endarterectomy              | Ipsilateral stroke    | Moderate     | AHRQ/ GRADE | AHRQ                                               | Appropriate randomization (3/3), allocation concealment (3/3), dropout rate <20% (3/3), blinded patient (0/3), blinded outcome assessment (2/3), intention to treat analysis (3/3), appropriate statistical analysis (3/3), if multicenter, was this accounted for in analysis? (0/3)/ overall: low risk of bias (3/3), quality A (3/3)                        |
| Raman 2013 (38)   | Carotid endarterectomy              | Stroke                | Moderate     | AHRQ/ GRADE | AHRQ                                               | Appropriate randomization (3/3), allocation concealment (3/3), dropout rate <20% (3/3), blinded patient (0/3), blinded outcome assessment (2/3), intention to treat analysis (3/3), appropriate statistical analysis (3/3), if multicenter, was this accounted for in analysis? (0/3)/ overall: low risk of bias (3/3), quality A (3/3)                        |
| Raman 2013 (38)   | Carotid artery stenting             | Periprocedural stroke | Insufficient | AHRQ/ GRADE | AHRQ                                               | Appropriate randomization (2/2), allocation concealment (1/2), dropout rate <20% (2/2), blinded patient (0/2), blinded outcome assessment (2/2), intention to treat analysis (2/2), appropriate statistical analysis (2/2), if multicenter, was this accounted for in analysis? (0/2)/ overall: low risk of bias (1/2), good quality (1/2), fair quality (1/2) |

|                      |                          |                                              |                                |       |                        |                                                                                                                                                                                                                                                                                             |
|----------------------|--------------------------|----------------------------------------------|--------------------------------|-------|------------------------|---------------------------------------------------------------------------------------------------------------------------------------------------------------------------------------------------------------------------------------------------------------------------------------------|
| Schweizer 2013 (39)  | Nasal deconolization     | Surgical site infection                      | NR                             | NA    | Cochrane               | Random sequence generation (5/5), allocation concealment (4/5), blinding of personnel and participants (5/5), blinding of outcome assessment (5/5), incomplete outcome data (5/5), selective reporting (4/5), other bias (5/5)                                                              |
| Schweizer 2013 (39)  | Glycopeptide prophylaxis | Surgical site infection                      | NR                             | NA    | Cochrane               | Random sequence generation (4/8), allocation concealment (2/8), blinding of personnel and participants (4/8), blinding of outcome assessment (5/8), incomplete outcome data (7/8), selective reporting (8/8), other bias (7/8)                                                              |
| Silvain 2012 (40)    | Enoxaparin               | All-cause mortality                          | NR                             | NA    | Cochrane/ NOS          | Low risk of bias (2/3); retrospective randomized analyses: NOS (9/9); rating for domains not presented                                                                                                                                                                                      |
| Silvain 2012 (40)    | Enoxaparin               | Major bleeding                               | NR                             | NA    | Cochrane/ NOS          | Low risk of bias (5/6); retrospective randomized analyses: NOS (9/9); rating for domains not presented                                                                                                                                                                                      |
| Silvain 2012 (40)    | Enoxaparin               | All-cause mortality or myocardial infarction | NR                             | NA    | Cochrane/ NOS          | Low risk of bias (7/11); retrospective randomized analyses: NOS (9/9); rating for domains not presented                                                                                                                                                                                     |
| Suthar 2012 (26)     | Antiretroviral therapy   | Tuberculosis infection                       | NR                             | NA    | Cochrane/ modified NOS | Random sequence generation (2/2), allocation concealment (2/2), blinding of personnel and participants and blinding of outcome assessment (0/2), incomplete outcome data (2/2), selective reporting (2/2), other bias (2/2)/ RCTs were also assessed by modified NOS (93% of maximum score) |
| Te Morenga 2013 (61) | Sugar                    | Weight gain                                  | Moderate                       | GRADE | Cochrane               | Random sequence generation (3/10), allocation concealment (1/10), blinding of personnel and participants (5/10), blinding of outcome assessment (1/10), incomplete outcome data (4/10), selective reporting (5/10), other bias (9/10), sugar industry funding (4/10)                        |
| Te Morenga 2013 (61) | Sugar                    | Body Mass Index                              | Moderate (BMI and BMI-z score) | GRADE | Cochrane               | Random sequence generation (3/3), allocation concealment (1/3), blinding of personnel and participants (0/3), blinding of outcome assessment (1/3), incomplete outcome data (3/3), selective reporting (3/3), other bias (3/3), sugar industry funding (2/3)                                |
| Thomas 2010 (92)     | Influenza vaccines       | Influenza-like illness                       | NR                             | NA    | Cochrane               | Random sequence generation (2/3), allocation concealment (1/3), blinding (0/3), incomplete outcome data (1/3), selective reporting (3/3), other bias (1/3)                                                                                                                                  |

|                           |                                 |                                        |                                                   |       |          |                                                                                                                                                                                                                                |
|---------------------------|---------------------------------|----------------------------------------|---------------------------------------------------|-------|----------|--------------------------------------------------------------------------------------------------------------------------------------------------------------------------------------------------------------------------------|
| Tickell-Painter 2017 (93) | Mefloquine                      | Discontinuation due to adverse effects | High (RCTs and cohort studies)                    | GRADE | Cochrane | Random sequence generation (3/3), allocation concealment (2/3), blinding of participants and personnel (2/3), blinding of outcome assessment (2/3), incomplete outcome data (0/3), selective reporting (1/3), other bias (1/3) |
| Tickell-Painter 2017 (93) | Mefloquine                      | Serious adverse events or effects      | NR                                                | NA    | Cochrane | Random sequence generation (0/3), allocation concealment (0/3), blinding of participants and personnel (3/3), blinding of outcome assessment (1/3), incomplete outcome data (2/3), selective reporting (0/3), other (1/3)      |
| Tickell-Painter 2017 (93) | Mefloquine                      | Nausea                                 | NR                                                | NA    | Cochrane | Random sequence generation (0/2), allocation concealment (0/2), blinding of participants and personnel (2/2), blinding of outcome assessment (1/2), incomplete outcome data (2/2), selective reporting (0/2), other (1/2)      |
| Tricco 2018 (45)          | Live-attenuated zoster vaccines | Suspected Herpes Zoster                | NR                                                | NR    | Cochrane | Random sequence generation (2/5), allocation concealment (1/5), blinding of personnel and participants (5/5), blinding of outcome assessment (4/5), incomplete outcome data (5/5), selective reporting (4/5), other bias (0/5) |
| Vinceti 2018 (59)         | Selenium                        | Cancer                                 | High (only for 3/5 studies with low risk of bias) | GRADE | Cochrane | Random sequence generation (4/5), allocation concealment (4/5), blinding (3/5), selective reporting (5/5)                                                                                                                      |
| Vinceti 2018 (59)         | Selenium                        | Cancer mortality                       | High (only for 1/2 studies with low risk of bias) | GRADE | Cochrane | Random sequence generation (2/2), allocation concealment (2/2), blinding (1/2), selective reporting (2/2)                                                                                                                      |
| Vinceti 2018 (59)         | Selenium                        | Colorectal cancer                      | High (only for 2/3 studies with low risk of bias) | GRADE | Cochrane | Random sequence generation (3/3), allocation concealment (3/3), blinding (2/3), selective reporting (3/3)                                                                                                                      |
| Wilson 2011 (41)          | Traditional birth attendants    | Perinatal mortality                    | NR                                                | NA    | CONSORT  | Adequate randomisation (5/5), baseline comparability (5/5), sample size calculation (5/5), accounted for clustering (4/5), masking (0/5), loss of clusters to follow-up (5/5), intention to treat analysis (5/5)               |
| Wilson 2011 (41)          | Traditional birth attendants    | Neonatal mortality                     | NR                                                | NA    | CONSORT  | Adequate randomisation (6/6), baseline comparability (6/6), sample size calculation (6/6), accounted for clustering (5/6), masking (0/6), loss of clusters to follow-up (6/6), intention to treat analysis (6/6)               |

|                  |                                                    |                                  |                                    |             |                                                          |                                                                                                                                                                                                                                |
|------------------|----------------------------------------------------|----------------------------------|------------------------------------|-------------|----------------------------------------------------------|--------------------------------------------------------------------------------------------------------------------------------------------------------------------------------------------------------------------------------|
| Wilson 2019 (42) | Unicompartmental knee arthroplasty                 | Venous thromboembolism           | NR                                 | NA          | Cochrane                                                 | Sequence generation (1/2), allocation concealment (2/2), blinding (2/2), incomplete outcome data (1/2), selective outcome report (1/2), free of other bias (2/2)                                                               |
| Wilson 2019 (42) | Unicompartmental knee arthroplasty                 | Flexion-extension range          | NR                                 | NA          | Cochrane                                                 | Sequence generation (0/3), allocation concealment (2/3), blinding (3/3), incomplete outcome data (3/3), selective outcome report (0/3), free of other bias (2/3)                                                               |
| Wilson 2019 (42) | Unicompartmental knee arthroplasty                 | Operation duration               | NR                                 | NA          | Cochrane                                                 | Sequence generation (1/3), allocation concealment (1/3), blinding (3/3), incomplete outcome data (2/3), selective outcome report (1/3), free of other bias (2/3)                                                               |
| Yank 2011 (44)   | Recombinant factor VII                             | All-cause mortality              | Low (RCTs and cohort studies)      | AHRQ/ GRADE | AHRQ/ based on various tools (JADAD, CONSORT and others) | Good (1/2), fair (1/2)                                                                                                                                                                                                         |
| Yank 2011 (44)   | Recombinant factor VII                             | Thromboembolism                  | Moderate (RCTs and cohort studies) | AHRQ/ GRADE | AHRQ/ based on various tools (JADAD, CONSORT and others) | Good (1/2), fair (1/2)                                                                                                                                                                                                         |
| Zhang 2016 (94)  | Everolimus-eluting bioresorbable vascular scaffold | Stent thrombosis                 | NR                                 | NA          | Cochrane                                                 | Random sequence generation (5/5), allocation concealment (4/5), blinding of personnel and participants (4/5), blinding of outcome assessment (5/5), incomplete outcome data (5/5), selective reporting (5/5), other bias (5/5) |
| Zhang 2016 (94)  | Everolimus-eluting bioresorbable vascular scaffold | All-cause mortality              | NR                                 | NA          | Cochrane                                                 | Random sequence generation (5/5), allocation concealment (5/5), blinding of personnel and participants (3/5), blinding of outcome assessment (5/5), incomplete outcome data (5/5), selective reporting (5/5), other bias (5/5) |
| Zhang 2016 (94)  | Everolimus-eluting bioresorbable vascular scaffold | Coronary heart disease mortality | NR                                 | NA          | Cochrane                                                 | Random sequence generation (3/3), allocation concealment (3/3), blinding of personnel and participants (1/3), blinding of outcome assessment (3/3), incomplete outcome data (3/3), selective reporting (3/3), other bias (3/3) |
| Zhang 2017 (95)  | Percutaneous coronary intervention                 | All-cause mortality              | NR                                 | NA          | Cochrane                                                 | Random sequence generation (4/5), allocation concealment (4/5), blinding of personnel and participants (0/6), blinding of outcome assessment (5/5), incomplete outcome data (4/5), selective reporting (5/5), other bias (4/5) |

|                 |                                    |                          |    |    |          |                                                                                                                                                                                                                                |
|-----------------|------------------------------------|--------------------------|----|----|----------|--------------------------------------------------------------------------------------------------------------------------------------------------------------------------------------------------------------------------------|
| Zhang 2017 (95) | Percutaneous coronary intervention | Cardiovascular mortality | NR | NA | Cochrane | Random sequence generation (4/4), allocation concealment (4/4), blinding of personnel and participants (0/4), blinding of outcome assessment (4/4), incomplete outcome data (3/4), selective reporting (4/4), other bias (3/4) |
| Zhang 2017 (95) | Percutaneous coronary intervention | Myocardial infarction    | NR | NA | Cochrane | Random sequence generation (4/5), allocation concealment (4/5), blinding of personnel and participants (0/5), blinding of outcome assessment (5/5), incomplete outcome data (4/5), selective reporting (5/5), other bias (4/5) |
| Ziff 2015 (96)  | Digoxin                            | All-cause mortality      | NR | NA | Cochrane | Random sequence generation (3/7), allocation concealment (4/7), blinding of personnel (7/7), blinding of outcome (6/7), incomplete outcome data (6/7), selective reporting (3/7), other threats to validity (1/7)              |
| Ziff 2015 (96)  | Digoxin                            | Cardiovascular mortality | NR | NA | Cochrane | Random sequence generation (3/5), allocation concealment (4/5), blinding of personnel (5/5), blinding of outcome (5/5), incomplete outcome data (5/5), selective reporting (3/5), other threats to validity (1/5)              |
| Ziff 2015 (96)  | Digoxin                            | Hospital admission       | NR | NA | Cochrane | Random sequence generation (2/2), allocation concealment (2/2), blinding of personnel (2/2), blinding of outcome (2/2), incomplete outcome data (2/2), selective reporting (2/2), other threats to validity (1/2)              |

AHRQ= agency for healthcare research and quality; CONSORT= consolidated standards of reporting trials; DDP-4= dipeptidyl peptidase 4; DHA= docosahexaenoic acid; EPA= eicosapentaenoic acid; GRADE= grades of recommendation, assessment, development, and evaluation; MINORS= methodological index for non-randomized studies; MOOSE= meta-analyses of observational studies in epidemiology; NA= not applicable; NOS= newcastle-ottawa scale; NR= not reported; NSTE-ACS= non-ST elevation acute coronary syndrome; QUATSO= quality assessment tool for systematic reviews of observational studies; RoB= risk of bias; SGLT-2= sodium glucose transporter 2; SIGN= scottish intercollegiate guidelines network; STROBE= strengthening the reporting of observational studies in epidemiology; UPSTF= united states preventive services task force.



**Table S6. Characteristics of included bodies of evidence from cohort studies**

| Reference/<br>year      | Intervention      | Outcome             | n<br>(studies) | Sample<br>size | Cases | Description of<br>population                                                                                                                                | Age; mean/<br>range (years) | Description of exposure                                                                                                                                                                                                                                                                                 | Description of<br>comparator                                                                                                                                                                                                                 | Description of<br>outcome | Study design<br>(cohort, nested case-<br>control, case-cohort)    | Follow-up (years) |
|-------------------------|-------------------|---------------------|----------------|----------------|-------|-------------------------------------------------------------------------------------------------------------------------------------------------------------|-----------------------------|---------------------------------------------------------------------------------------------------------------------------------------------------------------------------------------------------------------------------------------------------------------------------------------------------------|----------------------------------------------------------------------------------------------------------------------------------------------------------------------------------------------------------------------------------------------|---------------------------|-------------------------------------------------------------------|-------------------|
| Abou-Setta<br>2011 (74) | Nerve block       | Delirium            | 2              | 634            | 66    | Elderly population with hip fracture / health status: community dwelling or institutionalised / including patients with dementia (1x) or not specified (1x) | >50                         | Femoral nerve block with Bupivacaine 0.25% 30ml, maintenance: 0.1% Bupivacaine and IV analgesia with NSAID (1-2g Paracetamol) or Metamizol administered as patient-controlled analgesia (1x)/ 3-in-1 nerve block with Bupivacaine (Bolus of 100mg, maintenance with 50mg), administration every 8 hours | IV analgesia with Paracetamol or Metamizol 1-2g (1x) Preoperative: Morphine, Postoperative: Morphine tablets, Acetaminophen or Ibuprofen (1x)                                                                                                | Delirium                  | Retrospective cohort, retrospective cohort with historic controls | NR                |
| Abou-Setta<br>2011 (74) | Spinal anesthesia | All-cause mortality | 5              | 2,960          | 195   | Elderly population with hip fracture / health status: mostly not specified, partly previously community dwelling without severe dementia (1x)               | >65 to >75                  | Spinal anaesthesia, mostly with Bupivacaine / drugs and doses reported: Bupivacaine 0.5%, dosage: 2.5-5mg, continuous administration or single administration; Bupivacaine dosage: 8-15 mg, Mepivacaine 4 %, dosage: 2ml (80 mg)                                                                        | General anaesthesia / drugs and doses reported: Fentanyl 3-5mg/kg; Sulfentanil; Thiopental                                                                                                                                                   | Mortality at 30 days      | Prospective cohort, retrospective cohort                          | NR                |
| Aburto 2013<br>(75)     | Low sodium        | All-cause mortality | 7              | 21,515         | NR    | Male and female general population / with and without CVD and metabolic disease                                                                             | 25-74 (range)               | Low sodium intake or excretion / partly: risks for outcomes per 1.9 g/day intake change (1x)                                                                                                                                                                                                            | High sodium intake or status/ excretion / measured by: 24-hour dietary recall, overnight urinary sodium excretion, 24-hour sodium and potassium urinary excretion estimated from fasting morning urine, 24-hour urinary sodium concentration | All-cause mortality       | Prospective cohort, cohort, case-cohort analysis                  | 4.4-22 years      |

|                     |                           |                                  |    |         |       |                                                                                                                                         |                   |                                                                                                                                                                                                                                                        |                                                                                                                                                                                                                                                                    |                                                                                                                        |                                                                                 |              |
|---------------------|---------------------------|----------------------------------|----|---------|-------|-----------------------------------------------------------------------------------------------------------------------------------------|-------------------|--------------------------------------------------------------------------------------------------------------------------------------------------------------------------------------------------------------------------------------------------------|--------------------------------------------------------------------------------------------------------------------------------------------------------------------------------------------------------------------------------------------------------------------|------------------------------------------------------------------------------------------------------------------------|---------------------------------------------------------------------------------|--------------|
| Aburto 2013 (75)    | Low sodium                | Cardiovascular disease           | 9  | 46,483  | NR    | Male and female general population / with and without CVD and metabolic disease                                                         | >15/ 25-79 (mean) | Low sodium intake or excretion / partly: risks for outcomes per 1.9 g/day intake change (1x)                                                                                                                                                           | High sodium intake or status/ excretion / measured or estimated by various methods (24-hour urinary sodium excretion, overnight urinary sodium excretion, 24-hour dietary recall, 24-hour urinary sodium concentration or excretion, food frequency questionnaire) | Cardiovascular disease (stroke, MI, CHD, coronary revascularisation, death from cardiovascular disease)                | Prospective cohort, cohort, case-cohort analysis                                | <5-22 years  |
| Ahmad 2015 (27)     | Intra-aortic balloon pump | All-cause mortality              | 14 | 15,485  | 7.048 | Population with acute CVD: cardiogenic shock (13/14), mostly caused by MI                                                               | NR                | Intra-aortic balloon pump / mostly co-interventions for all patients: PCI (PCI) (5/14), thrombolysis (7/14), thrombolysis or PCI (1/14) / none (1/14)                                                                                                  | No intra-aortic balloon pump, intensive care                                                                                                                                                                                                                       | Mortality at 30 days                                                                                                   | Prospective cohort, cohort, retrospective cohort, observational analysis of RCT | NR           |
| Alexander 2017 (76) | DHA and EPA               | Coronary heart disease           | 17 | 687,166 | NR    | Male and female population / mostly healthy (without CVD at baseline), partly population with CVD / setting: highly developed countries | >18               | High intake of EPA and DHA / assessed by food frequency questionnaire or cross-check dietary history method / high intake: >0.25 to >0.34 g/day (EPA only); 1.72g/day (mean) to 5.18g/day (median); 0.24 % of total kcal (1x); 0.51% of total fat (1x) | Low EPA and DHA intake / low intake: 0g/day to 1.48g/day (median); 0.05% of total fat (1x); median 0.03% of total kcal (1x)                                                                                                                                        | Any CHD event (sudden cardiac death, coronary events, total MI, fatal MI, non-fatal MI, any CHD event, coronary death) | Prospective cohort                                                              | 4.8-40 years |
| Alexander 2017 (76) | DHA and EPA               | Coronary heart disease mortality | 14 | 615,427 | NR    | Male and female population / mostly healthy (without CVD at baseline), partly population with CVD / setting: highly developed countries | >18               | High intake of EPA and DHA / assessed by food frequency questionnaire or cross-check dietary history method / high intake: 0.22 to 2.64 g/day (mean/ median intake); >0.15 to >0.25 g/day; 0.51% of total fat (1x)/ 0.24% median of total kcal (1x)    | Low EPA and DHA / low intake: <0.04 to <0.25g/day; 0-0.58 g/day (mean/median); 0.05% of total fat (1x); median 0.03 % of total kcal (1x)                                                                                                                           | Fatal CHD (fatal MI, sudden cardiac death, coronary death)                                                             | Prospective cohort                                                              | 4.8-40 years |

|                     |                           |                                  |    |         |        |                                                                                                                                                                                                                                                                                                                                                                                         |                                            |                                                                                                                                                                              |                                                                                                             |                                                     |                                                                         |             |
|---------------------|---------------------------|----------------------------------|----|---------|--------|-----------------------------------------------------------------------------------------------------------------------------------------------------------------------------------------------------------------------------------------------------------------------------------------------------------------------------------------------------------------------------------------|--------------------------------------------|------------------------------------------------------------------------------------------------------------------------------------------------------------------------------|-------------------------------------------------------------------------------------------------------------|-----------------------------------------------------|-------------------------------------------------------------------------|-------------|
| Alexander 2017 (76) | DHA and EPA               | Coronary heart disease incidence | 4  | 193,330 | NR     | Male and female population without CVD at baseline / setting: highly developed countries                                                                                                                                                                                                                                                                                                | >18                                        | High intake of EPA and DHA / assessed by food frequency questionnaire / high intake: >0.19 g/day to >0.25 g/d; median 2.1 g/day (1x); median 0.24% of total kcal intake (1x) | Low EPA and DHA / low intake: <0.06g to <0.25g/day; median 0.03% of total kcal (1x); 0.3 median g/day (1x)  | Non-fatal CHD (non-fatal MI; also: coronary events) | Prospective cohort                                                      | 11-16 years |
| Alipanah 2018 (24)  | Self-administered therapy | Low treatment success            | 16 | 19,211  | 13,846 | Child and adult population / with: pulmonary or extrapulmonary tuberculosis, smear positive and negative / with or without: HIV-coinfection, previous treatment for tuberculosis / partly with: multidrug resistant tuberculosis / setting: countries with different levels of development (Brazil, China, Haiti, India, Japan, Nigeria, Poland, South Africa, Spain, Taiwan, Thailand) | ≥15/ or not specified (including children) | Self-administered therapy / partly: partially directly-observed therapy (1x)                                                                                                 | Directly observed therapy / providers: health staff in hospital or in community; community or family member | Low treatment success                               | Prospective cohort, retrospective cohort, cohort with historic controls | NR          |
| Alipanah 2018 (24)  | Self-administered therapy | Low treatment completion         | 14 | 11,679  | 3,469  | Child and adult population / with: pulmonary or extrapulmonary tuberculosis, smear positive and negative / with or without: HIV-coinfection, previous treatment for tuberculosis / partly with: multidrug resistant tuberculosis or metabolic disease / setting: countries with different levels of development (Brazil, Haiti, India, Japan, Poland, Thailand, U.K., USA)              | ≥15/ or not specified (including children) | Self-administered therapy                                                                                                                                                    | Directly observed therapy / providers: health staff in hospital or in community; community or family member | Low treatment completion                            | Prospective cohort, retrospective cohort                                | NR          |

|                     |                           |                     |    |         |        |                                                                                                                                                                                                                                                                                                                                                                                                                   |                                            |                                                                                                                                                                                                                              |                                                                                                             |                                                   |                                                                         |                                                             |
|---------------------|---------------------------|---------------------|----|---------|--------|-------------------------------------------------------------------------------------------------------------------------------------------------------------------------------------------------------------------------------------------------------------------------------------------------------------------------------------------------------------------------------------------------------------------|--------------------------------------------|------------------------------------------------------------------------------------------------------------------------------------------------------------------------------------------------------------------------------|-------------------------------------------------------------------------------------------------------------|---------------------------------------------------|-------------------------------------------------------------------------|-------------------------------------------------------------|
| Alipanah 2018 (24)  | Self-administered therapy | All-cause mortality | 23 | 100,208 | 1,603  | Child and adult population / with: pulmonary or extrapulmonary tuberculosis, smear positive and negative / with or without: HIV-coinfection, previous treatment for tuberculosis / partly with: multidrug resistant tuberculosis or metabolic disease / setting: countries with different levels of development (Brazil, China, Haiti, India, Japan, Nigeria, Poland, South Africa, Spain, Taiwan, Thailand, USA) | ≥15/ or not specified (including children) | Self-administered therapy                                                                                                                                                                                                    | Directly observed therapy / providers: health staff in hospital or in community; community or family member | Mortality                                         | Prospective cohort, retrospective cohort; cohort with historic controls | NR                                                          |
| Anglemyer 2013 (77) | Antiretroviral therapy    | HIV infection       | 9  | 97,898  | >2,084 | Serodiscordant couples (sexual partners) / mostly heterosexual, partly homosexual (2x) / either male or female partner HIV infected / populations with: drug abuse (2x), HSV-2 co-infection (1x) / setting: countries with or without a high state of development (Brazil, Botswana, China, Italy, Kenya, Rwanda, South Africa, Spain, Tanzania, Uganda, Zambia)                                                  | NR                                         | ART for infected partners / various stages of disease at baseline (e.g. 500 cells/μL and >80% without AIDS (1x) or 250 cells/μL or WHO stage IV illness / mostly with three or more drugs, partly with: Zidovudine only (1x) | No ART                                                                                                      | HIV infection (virologically linked and unlinked) | Prospective cohort, cohort, retrospective cohort                        | 53.6 to 101,295.1 person-years of exposure/ <1.3 to 6 years |
| Azad 2017 (21)      | Nonnutritive sweeteners   | Body Mass Index     | 1  | 3,371   | NA     | Male and female general population (randomly chosen households) / mean BMI 27 / setting: USA                                                                                                                                                                                                                                                                                                                      | 44 (mean)                                  | Highest intake quantile (22 or more artificially sweetened beverages per week)                                                                                                                                               | No artificially sweetened beverages                                                                         | BMI change                                        | Prospective cohort                                                      | 8 years                                                     |

|                            |                                          |                                    |   |        |     |                                                                                                                                                                                                                     |                          |                                                                                                                                                                                                                                                      |                                                                                                                                                                   |                                                                                                                                                                                                                                                                                                      |                                                                         |                               |
|----------------------------|------------------------------------------|------------------------------------|---|--------|-----|---------------------------------------------------------------------------------------------------------------------------------------------------------------------------------------------------------------------|--------------------------|------------------------------------------------------------------------------------------------------------------------------------------------------------------------------------------------------------------------------------------------------|-------------------------------------------------------------------------------------------------------------------------------------------------------------------|------------------------------------------------------------------------------------------------------------------------------------------------------------------------------------------------------------------------------------------------------------------------------------------------------|-------------------------------------------------------------------------|-------------------------------|
| Barnard 2015 (28)          | Surgical abortion by mid-level providers | Failure or incomplete abortion     | 2 | 12,850 | 62  | Pregnant women / mostly in 1st trimester of pregnancy / without uterine or cervical abnormalities (1x) / setting: USA                                                                                               | >16/<br>reproductive age | Abortion by experienced or specially trained mid-level providers (nurses, midwives, physician assistants) / procedures: manually, aspiration, vacuum curettage                                                                                       | Abortion by doctors (experienced or not specified) / vacuum curettage or not specified                                                                            | Incomplete abortion (requiring a repeat abortion/ failed abortion)                                                                                                                                                                                                                                   | Prospective cohort                                                      | 2-4 weeks                     |
| Barnard 2015 (28)          | Surgical abortion by mid-level providers | Complications                      | 2 | 12,850 | 116 | Pregnant women / mostly in 1st trimester of pregnancy / without uterine or cervical abnormalities (1x) / setting: USA                                                                                               | >16/<br>reproductive age | Abortion by experienced or specially trained mid-level providers (nurses, midwives, physician assistants) / procedures: manually, aspiration, vacuum curettage                                                                                       | Abortion by doctors (experienced or not specified) / vacuum curettage or not specified                                                                            | Early complications (not specified/ according to National Abortion Federation guidelines); delayed complications up to 2-4 weeks                                                                                                                                                                     | Prospective cohort                                                      | 2-4 weeks                     |
| Barnard 2015 (28)          | Surgical abortion by mid-level providers | Abortion failure and complications | 3 | 15,308 | 249 | Pregnant women / in 1st trimester of pregnancy / < 14 weeks gestation (2x) / population without: uterine or cervical abnormalities (1x) or pelvic inflammatory disease, increased bleeding risk (1x) / setting: USA | >16/<br>reproductive age | Abortion by experienced or specially trained mid-level providers (nurses, midwives, physician assistants), physician assistants without specified level of experience (1x) / procedures: manually, aspiration, vacuum curettage                      | Abortion by doctors (experienced or not specified (2x)) / vacuum curettage (1x), early uterine evacuation or suction curettage (1x), procedure not specified (1x) | Early complications during the procedure or before leaving the facility (not specified/ according to National Abortion Federation guidelines); delayed complications up to 2-4 weeks; Ectopic/ extrauterine pregnancy, perforation, cervical laceration, infection, haemorrhage, other complications | Prospective cohort                                                      | 2-4 weeks                     |
| Bellemain-Appaix 2012 (48) | Clopidogrel                              | All-cause mortality                | 8 | 29,206 | 799 | Adult population with CAD/CHD scheduled for catheterisation, PCI, or both                                                                                                                                           | NR                       | Clopidogrel 300 to $\geq$ 600mg loading dose several days to directly before procedure or 75mg maintenance dose $\geq$ 5 days (2x) / subsequent maintenance dose or loading dose administered some hours before procedure (2x) or not specified (1x) | Clopidogrel 300-600mg peri-interventionally or lower loading dose                                                                                                 | All-cause mortality                                                                                                                                                                                                                                                                                  | Prospective cohort, retrospective cohort, observational analysis of RCT | In hospital to 1 year (range) |

|                            |                  |                        |   |        |       |                                                                           |                  |                                                                                                                                                                                                                                                      |                                                                                               |                                                                                                                                                                                                                                                |                                                                         |                               |
|----------------------------|------------------|------------------------|---|--------|-------|---------------------------------------------------------------------------|------------------|------------------------------------------------------------------------------------------------------------------------------------------------------------------------------------------------------------------------------------------------------|-----------------------------------------------------------------------------------------------|------------------------------------------------------------------------------------------------------------------------------------------------------------------------------------------------------------------------------------------------|-------------------------------------------------------------------------|-------------------------------|
| Bellemain-Appaix 2012 (48) | Clopidogrel      | Major bleeding         | 8 | 29,232 | 611   | Adult population with CAD/CHD scheduled for catheterisation, PCI, or both | NR               | Clopidogrel 300 to $\geq$ 600mg loading dose several days to directly before procedure or 75mg maintenance dose $\geq$ 5 days (2x) / subsequent maintenance dose or loading dose administered some hours before procedure (2x) or not specified (1x) | Clopidogrel 300-600mg peri-interventionally or lower loading dose                             | Major bleeding: definitions given (TIMI minor/ major, vascular complication, transfusion, $\geq$ 4g/dl decrease in Hb, intracranial, $\geq$ 5g/dl Hb loss, requiring transfusion or surgery, clinically significant bleeding)                  | Prospective cohort, retrospective cohort, observational analysis of RCT | In hospital to 1 year (range) |
| Bellemain-Appaix 2012 (48) | Clopidogrel      | Coronary heart disease | 8 | 29,206 | 3,350 | Adult population with CAD/CHD scheduled for catheterisation, PCI, or both | NR               | Clopidogrel 300 to $\geq$ 600mg loading dose several days to directly before procedure or 75mg maintenance dose $\geq$ 5 days (2x) / subsequent maintenance dose or loading dose administered some hours before procedure (2x) or not specified (1x) | Clopidogrel 300-600mg peri-interventionally or lower loading dose                             | Major coronary event (Death, Myocardial infarction, urgent target vessel revascularization, recurrent acute coronary syndrome)                                                                                                                 | Prospective cohort, retrospective cohort, observational analysis of RCT | In hospital to 1 year (range) |
| Bellemain-Appaix 2014 (47) | P2Y12 inhibitors | All-cause mortality    | 4 | 11,175 | 186   | Adults undergoing PCI / 57.4-100% (range) with non-ST elevation ACS       | 59.4-67.3 (mean) | Clopidogrel pretreatment for PCI, $\geq$ 300mg Clopidogrel >12 hours or shortly before PCI or maintenance dose starting days before PCI                                                                                                              | Delayed treatment with $\geq$ 300mg Clopidogrel / shortly before, during or shortly after PCI | All-cause death; in hospital (2x) or at 30 days (2x)                                                                                                                                                                                           | Retrospective cohort, observational analysis of RCT                     | In hospital to 1 year (range) |
| Bellemain-Appaix 2014 (47) | P2Y12 inhibitors | Major bleeding         | 4 | 11,188 | 341   | Adults undergoing PCI / 57.4-100% (range) with non-ST elevation ACS       | 59.4-67.3 (mean) | Clopidogrel pretreatment for PCI, $\geq$ 300mg Clopidogrel >12 hours or shortly before PCI or maintenance dose starting days before PCI                                                                                                              | Delayed treatment with $\geq$ 300mg Clopidogrel / shortly before, during or shortly after PCI | Major bleeding; in hospital (2x) or at 30 days (2x); definitions: Thrombolysis in Myocardial Infarction major bleeding criteria (1x); $\geq$ 4 g/dL drop in Hb (1x); IC, transfusion, hemodynamic compromise (1x); clinically significant (1x) | Retrospective cohort, observational analysis of RCT                     | In hospital to 1 year (range) |

|                            |                    |                                  |    |         |        |                                                                                                                                                                                        |                              |                                                                                                                                                      |                                                                                                |                                                                       |                                                                                                      |                               |
|----------------------------|--------------------|----------------------------------|----|---------|--------|----------------------------------------------------------------------------------------------------------------------------------------------------------------------------------------|------------------------------|------------------------------------------------------------------------------------------------------------------------------------------------------|------------------------------------------------------------------------------------------------|-----------------------------------------------------------------------|------------------------------------------------------------------------------------------------------|-------------------------------|
| Bellemain-Appaix 2014 (47) | P2Y12 inhibitors   | Main composite ischemic endpoint | 4  | 11,188  | 848    | Adults undergoing PCI / 57.4-100% (range) with non-ST elevation ACS                                                                                                                    | 59.4-67.3 (mean)             | Clopidogrel pretreatment for PCI, $\geq 300$ mg Clopidogrel $> 12$ hours or shortly before PCI or maintenance dose starting days before PCI          | Delayed treatment with $\geq 300$ mg Clopidogrel / shortly before, during or shortly after PCI | Main composite ischemic endpoint; in hospital (2x) or at 30 days (2x) | Retrospective cohort, observational analysis of RCT                                                  | In hospital to 1 year (range) |
| Bloomfield 2016 (22)       | Mediterranean diet | Breast cancer                    | 13 | 805,893 | NR     | Female population / general population or healthy (no history of cancer) / setting: highly developed countries                                                                         | 38.5-62 (mean/median)        | High adherence to mediterranean diet or healthy diet / assessment with: variants or classic mediterranean diet score, other                          | Low adherence to mediterranean diet, healthy diet                                              | Breast cancer incidence                                               | Prospective cohort (including cohort-subcohort controlled study, reanalysis from prospective cohort) | 7-25 years                    |
| Bolland 2015 (49)          | Calcium            | All fractures                    | 5  | 116,199 | 11,194 | Mostly female population (women (3x), mixed (1x), men (1x)) / general population or basically healthy (3x): community dwelling, without risk factors for osteoporosis, able to walk    | 50-79 (range) / 56-81 (mean) | Mostly calcium supplement use with or without dietary calcium intake / partly additional vitamin D supplement use / dietary calcium intake only (1x) | No use of calcium supplements / never used calcium supplements (1x)                            | All fractures                                                         | Prospective cohort                                                                                   | 3-8.4 years (mean)            |
| Bolland 2015 (49)          | Calcium            | Vertebral fracture               | 1  | 9,704   | 389    | Female general population / without: women unable to walk                                                                                                                              | 72 (mean)                    | Current use of calcium supplements                                                                                                                   | Never used calcium supplements                                                                 | Vertebral fracture                                                    | Prospective cohort                                                                                   | 6.6 years                     |
| Bolland 2015 (49)          | Calcium            | Hip fracture                     | 6  | 270,446 | 2,828  | Mostly female population (women (3x), mixed (2x), male (1x), NR(1x)) / mostly general population                                                                                       | 50-79 (range) / 54-73 (mean) | Mostly calcium supplement use / partly calcium and vitamin D (1x)                                                                                    | No use of calcium supplements / never used calcium supplements (1x)                            | Hip fracture                                                          | Prospective cohort                                                                                   | 6.6-18 years                  |
| Brenner 2014 (29)          | Sigmoidoscopy      | Colorectal cancer mortality      | 1  | 88,902  | NR     | Male and female generally healthy population (health professionals, nurses) / without: baseline history of cancer, at risk for colorectal cancer / setting: highly developed countries | 62.5-68.3 (mean)             | Sigmoidoscopy                                                                                                                                        | No sigmoidoscopy                                                                               | Mortality from colorectal cancer                                      | Prospective cohort                                                                                   | 25 years                      |

|                      |                          |                             |    |         |       |                                                                                                                                                                   |               |                                                                                                                                                                                       |                                        |                                                                                                              |                                         |                   |
|----------------------|--------------------------|-----------------------------|----|---------|-------|-------------------------------------------------------------------------------------------------------------------------------------------------------------------|---------------|---------------------------------------------------------------------------------------------------------------------------------------------------------------------------------------|----------------------------------------|--------------------------------------------------------------------------------------------------------------|-----------------------------------------|-------------------|
| Brenner 2014 (29)    | Sigmoidoscopy            | Colorectal cancer incidence | 2  | 2,966   | NR    | Male and female general population / at average risk for colorectal cancer (1x) or without further exclusion criteria (1x) / setting: highly developed countries; | 55-85 (range) | Sigmoidoscopy                                                                                                                                                                         | No sigmoidoscopy                       | Colorectal cancer; late stages of colorectal cancer (2b to 4) only (1x)                                      | Prospective cohort, nested case-control | <10 years         |
| Chowdhury 2012 (78)  | Omega-3                  | Cerebrovascular disease     | 10 | 301,023 | 4,197 | Male and female population / general population, healthy at baseline / mostly in highly developed countries                                                       | 16-84 (range) | Omega-3 fatty acid intake / assessed with food frequency questionnaire or dietary recall / average intake (range) 0.11 g/day - 2.60 g/day                                             | Low Omega-3 fatty acid intake          | Cerebrovascular disease                                                                                      | Prospective cohort                      | 4-28 years (mean) |
| Chowdhury 2014a (79) | $\alpha$ -linolenic acid | Coronary heart disease      | 7  | 157,258 | 7,431 | Male (5x), female (1x) or mixed (1x) population / mostly healthy, partly with CVD (1x) / setting: highly developed countries                                      | 30-84 (range) | $\alpha$ -linolenic acid intake / assessed with food frequency questionnaire, diet history questionnaire, 7-day weighed food record, 4-day food record                                | Low intake of $\alpha$ -linolenic acid | Cardiovascular disease (non-fatal myocardial infarction, fatal coronary heart disease, sudden cardiac death) | Prospective cohort                      | 5-20 years        |
| Chowdhury 2014a (79) | Omega-3                  | Coronary heart disease      | 16 | 422,786 | 9,089 | General or healthy male and female population / partly with pre-existing CHD (1x)                                                                                 | 18-84 (range) | Dietary long chain omega-3 fatty acid intake / assessed with food frequency questionnaire, 7-day food diary, Diet history questionnaire, 4-day food record, 7-day weighed food record | Low intake                             | Coronary disease (myocardial infarction, coronary heart disease, sudden cardiac death, angina pectoris)      | Prospective cohort                      | 5-23 years        |
| Chowdhury 2014a (79) | Omega-6                  | Coronary heart disease      | 8  | 206,376 | 8,155 | General or healthy male and female population / partly with risk for CHD (1x)                                                                                     | 20-75 (range) | Dietary long chain omega-6 fatty acid intake / assessed with food frequency questionnaire, 7-day food diary, diet history questionnaire, 4-day food record, 7-day weighed food record | Low intake                             | Coronary disease (myocardial infarction, coronary heart disease, sudden cardiac death)                       | Prospective cohort                      | 5-20 years        |



|                      |                   |                          |    |         |        |                                                                                                                                                                                                                                                  |                                      |                                                                                                                         |                                                                                                       |                                                                                                                                             |                                          |                              |
|----------------------|-------------------|--------------------------|----|---------|--------|--------------------------------------------------------------------------------------------------------------------------------------------------------------------------------------------------------------------------------------------------|--------------------------------------|-------------------------------------------------------------------------------------------------------------------------|-------------------------------------------------------------------------------------------------------|---------------------------------------------------------------------------------------------------------------------------------------------|------------------------------------------|------------------------------|
| Chowdhury 2014b (80) | Vitamin D         | All-cause mortality      | 68 | 840,908 | 64,636 | Male and female population with or without pre-existing chronic disease (CVD, metabolic disease, cancer) / community dwelling or institutionalised / setting: mostly Europe and North America, partly Asia-Pacific Region and South America (1x) | 29-84 (range)                        | High circulating 25-hydroxyvitamin D (Serum or Plasma) / average level 10-30 ng/ml                                      | Low circulating 25-hydroxyvitamin D (Serum and Plasma)                                                | All-cause mortality                                                                                                                         | Prospective cohort, retrospective cohort | 0.3-29 years                 |
| Chung 2011 (58)      | Vitamin D         | Colorectal cancer        | 9  | 2,249   | 1,127  | Male and female general population / partly smokers (2x) / setting: USA, Europe and Japan                                                                                                                                                        | 57- 69.2 (mean)/ 40-79 (range)       | 10nmol/L increase in 25-hydroxyvitamin D blood concentration                                                            | NA                                                                                                    | Colorectal cancer (colorectal cancer, Invasive CRC (1x), Colon cancer (1x))                                                                 | Nested-case control                      | 7 months to 17 years (range) |
| Chung 2011 (58)      | Vitamin D         | Breast cancer            | 4  | 4,726   | 2,363  | Female general population / pre- and postmenopausal / setting: USA and Sweden (1x)                                                                                                                                                               | 57-70 (mean)/ 30-85 (range)          | 10nmol/L increase in 25-hydroxyvitamin D blood concentration                                                            | NA                                                                                                    | Breast cancer                                                                                                                               | Nested-case control                      | <1 month to 15 years (range) |
| Chung 2016 (56)      | Calcium           | Cardiovascular mortality | 6  | 160,954 | NR     | Male and female population / general population or without CVD at baseline                                                                                                                                                                       | 54-61 (mean)/ 25-78 (range)          | Risk per 100mg/day increase of total calcium intake / mean calcium intake 400–2,400mg/day                               | NA                                                                                                    | Cardiovascular (4x) or ischemic heart disease (2x) mortality                                                                                | Prospective cohort                       | 8–19 years                   |
| Ding 2017 (81)       | Dairy             | Systolic blood pressure  | 27 | 165,464 | NR     | Male and female general population / partly with CVD                                                                                                                                                                                             | 20-84 (range)                        | Dairy intake / mean 1.09-4.8 servings/day; 456g intake per day / change of systolic blood pressure per serving increase | Dairy intake / mean 0-0.93 servings/day; 84g intake per day; information not complete for all studies | Systolic blood pressure assessment: mostly clinical (16/27), self reported (2/27) or NR (9/27)                                              | Prospective cohort, cohort               | 0-17 years follow-up         |
| Fenton 2018 (30)     | Radiation therapy | Erectile dysfunction     | 7  | 2,950   | 1,625  | Male population with localised prostate cancer / partly with all stages (1x)                                                                                                                                                                     | 61.2-76 (mean/median)/ 37-88 (range) | Radiation therapy                                                                                                       | Conservative management / no active treatment, active surveillance, not further specified             | Erectile dysfunction; defined as erection not sufficient for sexual intercourse or partly presence of at least one troublesome symptom (1x) | Prospective cohort, retrospective cohort | 1-10 years                   |

|                     |                                           |                                                      |    |       |       |                                                                                                                                                                                          |                                      |                                                                                                                                                                              |                                                                                                                                              |                                                                                                                                          |                                          |                                |
|---------------------|-------------------------------------------|------------------------------------------------------|----|-------|-------|------------------------------------------------------------------------------------------------------------------------------------------------------------------------------------------|--------------------------------------|------------------------------------------------------------------------------------------------------------------------------------------------------------------------------|----------------------------------------------------------------------------------------------------------------------------------------------|------------------------------------------------------------------------------------------------------------------------------------------|------------------------------------------|--------------------------------|
| Fenton 2018 (30)    | Radical Prostatectomy                     | Urinary incontinence                                 | 5  | 5,067 | 911   | Male population with localised prostate cancer                                                                                                                                           | 61.2-69 (mean/median)/ 37-88 (range) | Radical prostatectomy                                                                                                                                                        | Conservative management / no active treatment, active surveillance, not further specified                                                    | Urinary incontinence; perceived as troublesome by patients, need for pads or frequent symptoms                                           | Prospective cohort                       | 1-3.8 years (mean/median)      |
| Fenton 2018 (30)    | Radical Prostatectomy                     | Erectile dysfunction                                 | 6  | 5,558 | 3,525 | Male population with localised prostate cancer                                                                                                                                           | 61.2-69 (mean/median)/ 37-88 (range) | Radical prostatectomy                                                                                                                                                        | Conservative management / no active treatment, active surveillance, not further specified                                                    | Erectile dysfunction defined as erection not sufficient for sexual intercourse; partly presence of at least one troublesome symptom (1x) | Prospective cohort, cohort               | 1-4.3 years (mean/median)      |
| Filippini 2017 (43) | Disease-modifying drugs                   | Conversion to clinically definite multiple sclerosis | 2  | 3,592 | NR    | Female (>70%) and male population / with: signs and symptoms compatible with early multiple sclerosis (and almost all with silent lesions in MRI) / mostly in highly developed countries | 32.5 (mean)/ 31.6 (median)           | Different disease modifying drugs (e.g. Interferon beta-1a, Interferon beta-1b, glatiramer acetate, others not specified), SC, IM or P.O. / early or delayed treatment (1/2) | No use of disease modifying drug                                                                                                             | Clinically definite multiple sclerosis, assessment by EDSS-score or Poser-criteria                                                       | Prospective cohort                       | 2 years/ 5,378.70 person-years |
| Fluri 2010 (31)     | Extracranial-intracranial arterial bypass | All-cause mortality                                  | 11 | 690   | 85    | Population with occlusive carotid artery disease / most participants included irrespective of cerebral haemodynamics                                                                     | NR                                   | Extracranial-intracranial arterial bypass plus medical treatment                                                                                                             | Best medical treatment / insufficient information, if reported various regimens: Aspirin with or without Dipyridamole, Clopidogrel, Warfarin | All-cause death                                                                                                                          | Prospective cohort, retrospective cohort | NR                             |
| Fluri 2010 (31)     | Extracranial-intracranial arterial bypass | Stroke                                               | 15 | 796   | 132   | Population with occlusive carotid artery disease / most participants included irrespective of cerebral haemodynamics                                                                     | NR                                   | Extracranial-intracranial arterial bypass plus medical treatment                                                                                                             | Best medical treatment / insufficient information, if reported various regimens: Aspirin with or without Dipyridamole, Clopidogrel, Warfarin | Any stroke                                                                                                                               | Prospective cohort, retrospective cohort | NR                             |

|                    |                                           |                                |    |        |     |                                                                                                                                                                                                                                                                                           |                                  |                                                                                                                         |                                                                                                                                              |                               |                                                                                                           |                    |
|--------------------|-------------------------------------------|--------------------------------|----|--------|-----|-------------------------------------------------------------------------------------------------------------------------------------------------------------------------------------------------------------------------------------------------------------------------------------------|----------------------------------|-------------------------------------------------------------------------------------------------------------------------|----------------------------------------------------------------------------------------------------------------------------------------------|-------------------------------|-----------------------------------------------------------------------------------------------------------|--------------------|
| Fluri 2010 (31)    | Extracranial-intracranial arterial bypass | Stroke mortality or dependency | 8  | 346    | 131 | Population with occlusive carotid artery disease / most participants included irrespective of cerebral haemodynamics                                                                                                                                                                      | NR                               | Extracranial-intracranial arterial bypass plus medical treatment                                                        | Best medical treatment / insufficient information, if reported various regimens: Aspirin with or without Dipyridamole, Clopidogrel, Warfarin | Death or dependency           | Retrospective cohort                                                                                      | NR                 |
| Gargiulo 2016 (32) | Transcatheter aortic valve                | Early all-cause mortality      | 29 | 12,464 | 592 | Male and female population with severe CVD / mostly including patients at high surgical risk (22x) or only patients at low or intermediate risk (7x) / partly population with: metabolic disease, kidney disease, pulmonary disease                                                       | 71.1-82.7 (mean) / 60-94 (range) | Transcatheter aortic valve replacement / mostly by femoral access / first generation valve, partly Sapien 3 valve (1x)  | Surgical aortic valve replacement                                                                                                            | Early all-cause mortality     | Prospective cohort, retrospective cohort with or without historic controls, retrospective database cohort | 2-5 years (6x/ NR) |
| Gargiulo 2016 (32) | Transcatheter aortic valve                | Mid-term all-cause mortality   | 18 | 7,400  | 998 | Male and female population with severe CVD / mostly including patients at high surgical risk (11x) or only patients at low or intermediate risk (7x) / partly population with: metabolic disease, kidney disease, pulmonary disease                                                       | 71.1-82.7 (mean) / 60-94 (range) | Transcatheter aortic valve replacement / mostly by femoral access / first generation valve, partly Sapien 3 valve (1x)  | Surgical aortic valve replacement                                                                                                            | Midterm all-cause mortality   | Prospective cohort, retrospective cohort with or without historic controls, retrospective database cohort | 2-5 years (3x/ NR) |
| Gargiulo 2016 (32) | Transcatheter aortic valve                | Long-term all-cause mortality  | 6  | 1,750  | 316 | Male and female population with severe CVD / all including patients at high surgical risk / partly population with: metabolic disease, kidney disease, pulmonary disease                                                                                                                  | 78.2-82.3 (mean)                 | Transcatheter aortic valve replacement / mostly by femoral access / first generation valve                              | Surgical aortic valve replacement                                                                                                            | Long-term all-cause mortality | Retrospective cohort                                                                                      | 2-5 years          |
| Hartling 2013 (50) | Treating gestational diabetes mellitus    | High birth weight              | 5  | 3,168  | 331 | Pregnant women with borderline, mild or definite GDM / mean fasting glucose reported for one study (5.4 mmol/l), BMI 23.11-30.3 / population without complicated pregnancies (e.g. without multiple gestation, fetal anomaly) or not specified / ethnicity: asian, black, hispanic, white | 27.6- 34.4 (mean)                | Dietary counseling, formal diet (3x) e.g. with caloric restriction / blood glucose monitoring, insulin if required (5x) | Standard care                                                                                                                                | Birth weight > 4000g          | Retrospective cohort                                                                                      | NR                 |

|                     |                                        |                                   |   |        |      |                                                                                                                                                                                                                                                                               |                          |                                                                                                                         |                                                           |                                   |                                                                                               |              |
|---------------------|----------------------------------------|-----------------------------------|---|--------|------|-------------------------------------------------------------------------------------------------------------------------------------------------------------------------------------------------------------------------------------------------------------------------------|--------------------------|-------------------------------------------------------------------------------------------------------------------------|-----------------------------------------------------------|-----------------------------------|-----------------------------------------------------------------------------------------------|--------------|
| Hartling 2013 (50)  | Treating gestational diabetes mellitus | Large-for-gestational age neonate | 4 | 2,294  | 388  | Pregnant women / mostly mild or borderline GDM, partly definite GDM (1x) / mean fasting glucose reported for one study (5.4 mmol/l), BMI: 23.12-30.3 / complicated pregnancies (e.g. multiple gestation) excluded or not specified / ethnicity: asian, black, hispanic, white | 27.6-31.5 (mean)         | Dietary counseling, formal diet (2x) e.g. with caloric restriction / blood glucose monitoring, insulin if required (4x) | Standard care                                             | Large-for-gestational age neonate | Retrospective cohort                                                                          | NR           |
| Hartling 2013 (50)  | Treating gestational diabetes mellitus | Shoulder dystocia                 | 4 | 3,054  | 48   | Pregnant women with mild GDM or all types of GDM / mean fasting glucose reported for one study (5.4 mmol/l), BMI: 23.11-30.3 / complicated pregnancies (e.g. multiple gestations) excluded or not specified / ethnicity: asian, black, hispanic, white                        | 27.6-34.4 (mean)         | Dietary counseling, formal diet (3x) e.g. with caloric restriction / blood glucose monitoring, insulin if required (4x) | Standard care                                             | Shoulder dystocia                 | Retrospective cohort                                                                          | NR           |
| Henderson 2019 (51) | Treating asymptomatic bacteriuria      | Pyelonephritis                    | 2 | 5,289  | 74   | Pregnant women / with and without asymptomatic bacteriuria / < 25 weeks to < 33 weeks of gestation / no exclusion criteria reported / setting: Turkey and Spain                                                                                                               | 27.7 (mean) / NR (1x)    | Treating screen detected asymptomatic bacteriuria / different antibiotics                                               | No screening (and treatment) for asymptomatic bacteriuria | Pyelonephritis                    | Cohort with historic controls                                                                 | NR           |
| Higgins 2016 (25)   | Bacillus Calmette-Guérin               | All-cause mortality               | 8 | 12,225 | >826 | Infants and children / mostly no exclusion criteria specified / with DTP vaccination, with or without measles vaccination / low birth weight children (2x) / setting: Guinea-Bissau, India, Malawi, Papua-New Guinea, Senegal                                                 | 29 days to 23 months/ NR | BCG vaccination                                                                                                         | No BCG vaccination                                        | All-cause mortality               | Prospective cohort, retrospective cohort, retrospective database cohort, cohort nested in RCT | <0.5-5 years |

|                      |                             |                     |    |        |        |                                                                                                                                                                                                                                                                                                                                               |                             |                                                                                                                                                                             |                                                          |                     |                                                                         |                                       |
|----------------------|-----------------------------|---------------------|----|--------|--------|-----------------------------------------------------------------------------------------------------------------------------------------------------------------------------------------------------------------------------------------------------------------------------------------------------------------------------------------------|-----------------------------|-----------------------------------------------------------------------------------------------------------------------------------------------------------------------------|----------------------------------------------------------|---------------------|-------------------------------------------------------------------------|---------------------------------------|
| Higgins 2016<br>(25) | Measles containing vaccines | All-cause mortality | 13 | 82,208 | >1,290 | Infants and children / mostly no exclusion criteria specified / with and without prior DTP or BCG vaccination / infants with low birth weight (1x) / setting: Bangladesh, Guinea-Bissau, Haiti, India, Malawi, Papua New-Guinea, Senegal                                                                                                      | <4 months to <35 months/ NR | Measles containing vaccine / number of doses unclear / timing (range) 0-13 months or not reported / monovalent (2x), Schwarz or Edmonston-Zagreb (2x) or not reported (11x) | No measles containing vaccines                           | All-cause mortality | Prospective cohort, retrospective cohort, cohort with historic controls | 2-5 years                             |
| Hopley 2010<br>(33)  | Total hip arthroplasty      | Reoperation         | 6  | 787    | 54     | Mostly female population with displaced femoral neck fracture / prior ambulatory patients only (3x), mostly no specific information on health status (mean ASA 3 (1x), without severe cognitive impairment (1x)) / note: the study conducted in women with mean age 59 years was conducted in India in a setting with reduced life expectancy | 59-84 (mean)                | Total hip arthroplasty, cemented (5x) / cemented or uncemented (1x)                                                                                                         | Uni- or bipolar, cemented or uncemented hemiarthroplasty | Reoperation         | Retrospective cohort                                                    | 1-71 months (range of mean follow-up) |
| Hopley 2010<br>(33)  | Total hip arthroplasty      | Dislocation         | 5  | 721    | 22     | Mostly female population with displaced femoral neck fracture / prior ambulatory patients only (2x), mostly no specific information on health status (mean ASA 3 (1x), without severe cognitive impairment (1x)) / note: the study conducted in women with mean age 59 years was conducted in India in a setting with reduced life expectancy | 59-84 (mean)                | Total hip arthroplasty, cemented (4x) / cemented or uncemented (1x)                                                                                                         | Uni- or bipolar, cemented or uncemented hemiarthroplasty | Dislocation         | Retrospective cohort                                                    | 1-70 months (range of mean follow-up) |
| Hopley 2010<br>(33)  | Total hip arthroplasty      | Deep infection      | 4  | 806    | 10     | Mostly female population with displaced femoral neck fracture / mostly no specific information on health status (mean ASA 3 (1x), without severe cognitive impairment (1x), prior ambulatory patients only (1x))                                                                                                                              | 72-84 (mean)                | Total hip arthroplasty, cemented                                                                                                                                            | Uni- or bipolar, cemented or uncemented hemiarthroplasty | Deep infections     | Retrospective cohort                                                    | 1-70 months (range of mean follow-up) |

|                     |                                        |                        |    |        |       |                                                                                                                                                                                                                                                                                           |                                 |                                                                                                                                                                                                                                                  |                                                                                                    |                                                                                                                                                                                                               |                                                                         |                                                  |
|---------------------|----------------------------------------|------------------------|----|--------|-------|-------------------------------------------------------------------------------------------------------------------------------------------------------------------------------------------------------------------------------------------------------------------------------------------|---------------------------------|--------------------------------------------------------------------------------------------------------------------------------------------------------------------------------------------------------------------------------------------------|----------------------------------------------------------------------------------------------------|---------------------------------------------------------------------------------------------------------------------------------------------------------------------------------------------------------------|-------------------------------------------------------------------------|--------------------------------------------------|
| Hüpfli 2010 (67)    | Standard cardiopulmonary resuscitation | Survival               | 7  | 13,883 | 1,086 | Population with out-of-hospital cardiac arrest                                                                                                                                                                                                                                            | NR                              | Bystander standard cardiopulmonary resuscitation (including rescue ventilation), without instructions or assistance                                                                                                                              | Bystander chest-compression-only cardiopulmonary resuscitation, without instructions or assistance | Survival to hospital discharge or closest available endpoint: 30-day survival, 1-week survival, awake after 14 days                                                                                           | Prospective cohort, retrospective cohort, cohort                        | Survival to hospital discharge to 1 year (range) |
| Jamal 2013 (82)     | Non-calcium-based phosphat binders     | All-cause mortality    | 3  | 2,813  | 791   | Male and female population with advanced kidney disease requiring haemodialysis                                                                                                                                                                                                           | 61.5-68 (mean)                  | Non-calcium-based phosphat binder (Sevelamer)                                                                                                                                                                                                    | Calcium-based phosphat binders (calcium acetate or calcium carbonat)                               | All-cause mortality                                                                                                                                                                                           | Prospective cohort, retrospective cohort                                | 2-3.5 years                                      |
| Jefferson 2010 (46) | Parenteral influenza vaccine           | Influenza-like illness | 30 | 22,001 | 2,268 | Elderly population / generally healthy community-dwelling or institutionalised (nursing home residents, health status mostly not further specified) / partly: chronically ill nursing home residents requiring intermediate and skilled nursing care, suffering from dementia, bed ridden | 71-85 (mean)/ 30 to 108 (range) | Parenteral influenza vaccines / mostly trivalent / matching or not matching the circulating strains (during or not during outbreak) / partly: amantadine prophylaxis for nursing home residents (either all, ill residents or healthy residents) | No vaccination                                                                                     | Influenza like illness mostly clinically defined (e.g. fever, chills, congestion, cough, coryza, sore throat, general malaise, myalgia) / partly laboratory, epidemiological and clinical criteria            | Prospective cohort, cohort, retrospective cohort                        | < 1-5 months                                     |
| Jefferson 2010 (46) | Parenteral influenza vaccine           | Influenza              | 10 | 20,190 | 185   | Elderly population / community-dwelling, general elderly population or institutionalised (in nursing homes with or without known diseases)                                                                                                                                                | 80-85 (mean)/ 36-105 (range)    | Parenteral influenza vaccines / mostly trivalent / strains mostly matching the circulating strains in epidemic or non-epidemic years                                                                                                             | No vaccination                                                                                     | Mostly laboratory confirmed influenza (4-fold increase in antibody titre/ not specified); Influenza as defined by International Classification for primary care (Ix, R80: proven influenza without pneumonia) | Prospective cohort, retrospective database cohort, retrospective cohort | 1-10 months                                      |

|                     |                                |                          |    |         |       |                                                                                                                                                                         |                |                                                                                                                                                     |                                                                                |                                                                                                                                                                                |                                                  |            |
|---------------------|--------------------------------|--------------------------|----|---------|-------|-------------------------------------------------------------------------------------------------------------------------------------------------------------------------|----------------|-----------------------------------------------------------------------------------------------------------------------------------------------------|--------------------------------------------------------------------------------|--------------------------------------------------------------------------------------------------------------------------------------------------------------------------------|--------------------------------------------------|------------|
| Jefferson 2012 (34) | Inactivated influenza vaccines | Influenza                | 1  | 1,302   | 35    | Male and female infants and children / general population / setting: Japan                                                                                              | 0-15 (range)   | Inactivated influenza vaccine / one or two doses / sliding scale of doses according to age / unclear if tri- or bivalent / (cohort study from 2003) | No vaccination                                                                 | Influenza defined as: Influenza-like illness plus rapid test diagnosis, or serum antibody increase or viral isolation                                                          | Prospective cohort                               | <8 months  |
| Jefferson 2012 (34) | Inactivated influenza vaccines | Influenza-like illness   | 2  | 4,215   | 1,366 | Male and female infants and children / general population / setting: Japan                                                                                              | 0-15 (range)   | Inactivated influenza vaccines / one or two doses / trivalent or NR / dosing according to age / (cohort studies from 2003/2006)                     | No vaccination                                                                 | Influenza-like illness; clinical definition: sudden onset, temperature over 38 °C, sore throat and fatigue/ acute febrile illness occurring during the highest epidemic period | Prospective cohort                               | <8 months  |
| Jin 2012 (83)       | Total flavonoids               | Colorectal neoplasms     | 3  | 72,320  | 1,022 | General population / pre- and postmenopausal women, men from the the health professionals follow-up study (1x), woman from the Nurses' Health study (1x) / setting: USA | >45/ (NR 2x)   | High flavonoid intake                                                                                                                               | Low flavonoid intake                                                           | Colorectal cancer                                                                                                                                                              | Prospective cohort, sub-cohort controlled cohort | NR         |
| Johnston 2019 (23)  | Low red meat                   | All-cause mortality      | 24 | 545,071 | NR    | Male and female population, generally healthy                                                                                                                           | 33-74.1 (mean) | Lower adherence to diet high in red or processed meat (western diet, diet with pasta and meat, unhealthy diet, others) or vegetarian diet           | Higher adherence to diet rich in red and processed meat or non-vegetarian diet | All-cause mortality                                                                                                                                                            | Prospective cohort                               | 4-26 years |
| Johnston 2019 (23)  | Low red meat                   | Cardiovascular mortality | 25 | 858,554 | NR    | Male and female population, generally healthy                                                                                                                           | 33-67 (mean)   | Lower adherence to diet high in red or processed meat (western diet, diet with pasta and meat, unhealthy diet, others) or vegetarian diet           | Higher adherence to diet rich in red and processed meat or non-vegetarian diet | Cardiovascular mortality                                                                                                                                                       | Prospective cohort                               | 4-26 years |
| Johnston 2019 (23)  | Low red meat                   | Cardiovascular disease   | 12 | 113,737 | NR    | Male and female population, generally healthy                                                                                                                           | 38.2-67 (mean) | Lower adherence to diet high in red or processed meat (mostly western diet, southern diet, others) or vegetarian diet                               | Higher adherence to diet rich in red and processed meat or non-vegetarian diet | Cardiovascular disease                                                                                                                                                         | Prospective cohort                               | 4-17 years |

|                     |                                                 |                      |    |         |       |                                                                                                                                                                                                                                                               |                          |                                                                                                                                                                                                                                                                                                                                                                      |                                                          |                                                                          |                                                                                    |                                     |
|---------------------|-------------------------------------------------|----------------------|----|---------|-------|---------------------------------------------------------------------------------------------------------------------------------------------------------------------------------------------------------------------------------------------------------------|--------------------------|----------------------------------------------------------------------------------------------------------------------------------------------------------------------------------------------------------------------------------------------------------------------------------------------------------------------------------------------------------------------|----------------------------------------------------------|--------------------------------------------------------------------------|------------------------------------------------------------------------------------|-------------------------------------|
| Kansagara 2013 (52) | Transfusion                                     | All-cause mortality  | 11 | 172,988 | NR    | Male and female population with anemia / setting: non-operative, patients with acute CVD, mostly MI / partly: population undergoing vascular surgery or orthopedic surgery (1x)                                                                               | 59-77.8 (mean)           | Received transfusions; nadir of haematocrit 26.5-29.2% (mean/ median) / haemoglobin 8.7-10g/dL                                                                                                                                                                                                                                                                       | Received no transfusions                                 | Mortality at 30 days; mortality or myocardial infarction at 30 days (2x) | Observational analysis of RCT, retrospective cohort, retrospective database cohort | >30 days-4 years                    |
| Keag 2018 (84)      | Caesarean section                               | Urinary incontinence | 8  | 65,842  | NR    | Female general population / primiparae only (3/8) / all types of birth presentations, without: multiple gestation (4x), risk pregnancy (1x), previous pelvic organ prolapse or urinary incontinence surgery (1x) / setting: mostly highly developed countries | >18/ <80 (at assessment) | Caesarean section                                                                                                                                                                                                                                                                                                                                                    | Vaginal birth                                            | Urinary incontinence                                                     | Prospective cohort, retrospective cohort                                           | 1-21 years/ until age of 65 (1x)    |
| Keag 2018 (84)      | Caesarean section                               | Fecal incontinence   | 5  | 43,260  | NR    | Female general population / primiparae only (3/5) / all types of birth presentations / setting: in highly developed countries                                                                                                                                 | >18/ <80 (at assessment) | Caesarean section                                                                                                                                                                                                                                                                                                                                                    | Vaginal birth                                            | Fecal incontinence                                                       | Prospective cohort, retrospective cohort                                           | 1-20 years                          |
| Kredo 2014 (85)     | Starting and maintaining antiretroviral therapy | All-cause mortality  | 2  | 39,160  | 3,771 | Female and male population / median baseline CD4 117-119 cells/ $\mu$ L (1x), with advanced HIV-infection (CD4 count <200 cells/ $\mu$ L, WHO clinical stage 4) (1x) / setting: Ethiopia and rural South Africa                                               | Adults/ NR               | ART task-shifting from doctors to nurses and decentralisation to peripheral health offers / initiation and maintenance of ART by nurses and health officers and referral to doctors in case of treatment failure or severe manifestation; additional support with mobile physician team, adherence counselors and patient support groups (1x) / various ART regimens | Initiation and maintenance of ART by doctors at hospital | Death at 12 months                                                       | Retrospective cohort                                                               | 1-2 years maximum follow-up (range) |



|                 |                                                 |                     |   |         |        |                                                                                                                                                                                                                                                                                                                                                 |                            |                                                                                                                                                                                                                                                                                                                                                                      |                                                                                                                                                                      |                                                                |                                          |                                     |
|-----------------|-------------------------------------------------|---------------------|---|---------|--------|-------------------------------------------------------------------------------------------------------------------------------------------------------------------------------------------------------------------------------------------------------------------------------------------------------------------------------------------------|----------------------------|----------------------------------------------------------------------------------------------------------------------------------------------------------------------------------------------------------------------------------------------------------------------------------------------------------------------------------------------------------------------|----------------------------------------------------------------------------------------------------------------------------------------------------------------------|----------------------------------------------------------------|------------------------------------------|-------------------------------------|
| Kredo 2014 (85) | Starting and maintaining antiretroviral therapy | Attrition           | 2 | 39,156  | 11,038 | Female and male population / median baseline CD4 117-119 cells/ $\mu$ L (1x), with advanced HIV-infection (CD4 count <200 cells/ $\mu$ L, WHO clinical stage 4)(1x) / setting: Ethiopia and rural South Africa                                                                                                                                  | Adults/ NR                 | ART task-shifting from doctors to nurses and decentralisation to peripheral health offers / initiation and maintenance of ART by nurses and health officers and referral to doctors in case of treatment failure or severe manifestation; additional support with mobile physician team, adherence counselors and patient support groups (1x) / various ART regimens | Initiation and maintenance of ART by doctors at hospital                                                                                                             | Lost to follow-up 12 months                                    | Retrospective cohort                     | 1-2 years maximum follow-up (range) |
| Kredo 2014 (85) | Maintaining antiretroviral therapy              | All-cause mortality | 1 | 2,772   | 34     | Male and female population / on ART without complications, eligible for down-referral (ART for >11 months, no opportunistic infections, stable weight, virologically suppressed <400 copies/mL, CD4 cell > 200 cells/ $\mu$ L) / median CD4 at down referral 389 cells/ $\mu$ L, on ART for median 30 months / setting: peri-urban South Africa | 35.3 (mean)                | ART task-shifting from doctors to nurses and decentralisation to peripheral health offers / maintenance by nurses ( patients down-referred by doctors) and referral to doctors in case of complications (e.g. toxicity, detectable viral load) / various ART regimens / co-intervention (all patients) adherence counselling                                         | Initiation and maintenance of ART by doctors at advanced hospital (were not offered down-referral or refused) / co-intervention (all patients) adherence counselling | Death at 12 months                                             | Retrospective cohort                     | 1 year follow-up                    |
| Li 2014 (54)    | Exenatide                                       | Acute pancreatitis  | 2 | 307,176 | <1,466 | Male and female population with diabetes / no pancreatitis or pancreatic cancer at baseline / mean diabetes duration 3.1 years (1x) / 59.7-81.5% receiving Metformin at baseline (1x) / setting: USA                                                                                                                                            | 52.7-63.1 (mean)           | Exenatide                                                                                                                                                                                                                                                                                                                                                            | No Exenatide (1x) / known exposure to other antidiabetic drug (Sulfonylurea, Biguanide, Thiazolidinedione) (1x)                                                      | Acute pancreatitis (1x)/ Admission for acute pancreatitis (1x) | Retrospective database cohort            | >1 year                             |
| Li 2016 (53)    | DDP-4 inhibitors                                | Heart failure       | 4 | 21,435  | 998    | Male and female population with diabetes / with or without CVD at baseline / median BMI 32.6 (1x), median HbA1c 7.3% (1x), median diabetes duration 4.9 years (1x) / setting: Europe                                                                                                                                                            | 55 (mean) to 65.8 (median) | DDP-4 inhibitors (any) with or without Metformin (2x) or Sitagliptin with or without Metformin (2x)                                                                                                                                                                                                                                                                  | Sulfonylureas with or without Metformin (3x) or no use of Sitagliptin (1x)                                                                                           | Heart failure                                                  | Prospective cohort, retrospective cohort | 1-4 years (mean/ median)            |

|                      |                                   |                                      |   |           |       |                                                                                                                                                                                                                                                          |                |                                                                                                                                                                  |                                                                                                                   |                                                                                                                                                  |                                                     |                                |
|----------------------|-----------------------------------|--------------------------------------|---|-----------|-------|----------------------------------------------------------------------------------------------------------------------------------------------------------------------------------------------------------------------------------------------------------|----------------|------------------------------------------------------------------------------------------------------------------------------------------------------------------|-------------------------------------------------------------------------------------------------------------------|--------------------------------------------------------------------------------------------------------------------------------------------------|-----------------------------------------------------|--------------------------------|
| Li 2016 (53)         | DDP-4 inhibitors                  | Hospital admission for heart failure | 6 | 1,618,295 | 4,341 | Male and female population with diabetes / with or without CVD at baseline / HbA1c 8.0% (1x) or not reported (5x), mean diabetes duration 2.3-2.5 years                                                                                                  | 58.3-67 (mean) | DDP-4 inhibitors (any)                                                                                                                                           | Sulfonylureas, Pioglitazone or other oral antidiabetic drugs, not specified (1x)                                  | Hospital admission for heart failure                                                                                                             | Retrospective cohort, nested-case control           | 0.5-2.6 years (mean/median)    |
| Matthews 2018 (86)   | Tamoxifen                         | Heart failure                        | 2 | 29,562    | NR    | Female postmenopausal population with breast cancer (primary breast cancer survivors of all stages or stage I-II breast cancer, estrogen- or progesterone-receptor-positive breast cancer) / without CVD                                                 | 45-69 (range)  | Tamoxifen use                                                                                                                                                    | No use of Tamoxifen (e.g. treatment with aromatase-inhibitors)                                                    | Heart failure                                                                                                                                    | Retrospective database cohort                       | 72886 person-years / <10 years |
| Menne 2019 (87)      | SGLT-2 inhibitors                 | Acute kidney injury                  | 5 | 83,934    | 777   | Population with diabetes (e.g. members of health plan, registered as antidiabetic drug users) with standard care background therapy / partly: population with advanced kidney disease only (eGFR <60 mL/min) (1x)                                        | NR             | SGLT-2 Inhibitors / drugs: any of Canagliflozin, Empagliflozin, Dapagliflozin or Dapagliflozin only (1x)                                                         | No SGLT-2 Inhibitor use, treatment with other antidiabetic drugs (e.g. DDP 4-inhibitors, GLP-1 receptor agonists) | Any acute kidney injury / varying definitions (different ICD codes, hospitalisation for acute kidney injury, hospitalisation for kidney disease) | Retrospective cohort, retrospective database cohort | 24-62 weeks (follow-up)        |
| Mesgarpour 2017 (88) | Erythropoiesis stimulating agents | Venous thromboembolism               | 5 | 13,963    | 180   | Male and female population / medical or surgical ICU with or without anemia (3/5 populations with definite anemia, defined for 1x: Hb<12g/dL) / reasons for admission: trauma, burns / only patients receiving enoxaparin or unfractionated heparin (2x) | >16            | Erythropoiesis stimulating agents / drugs and dosing: any (2x); SC rHuEPO 40,000 IU/week; Darbepoetin alfa; SC rHuEPO 100 IU/kg or Darbepoetin 0.45 µg/kg weekly | No erythropoiesis stimulating agents                                                                              | Venous thromboembolism                                                                                                                           | Retrospective cohort, retrospective database cohort | 30 days/ NR (4x)               |

|                      |                                      |                                      |   |          |       |                                                                                                                                                                                                                                     |                  |                                                                                                                                                                                          |                                                                                                         |                                        |                                                                   |                                 |
|----------------------|--------------------------------------|--------------------------------------|---|----------|-------|-------------------------------------------------------------------------------------------------------------------------------------------------------------------------------------------------------------------------------------|------------------|------------------------------------------------------------------------------------------------------------------------------------------------------------------------------------------|---------------------------------------------------------------------------------------------------------|----------------------------------------|-------------------------------------------------------------------|---------------------------------|
| Mesgarpour 2017 (88) | Erythropoiesis stimulating agents    | All-cause mortality                  | 7 | >924,791 | NR    | Male and female population / critically-ill and at ICU / with definite anemic population (2x) / other specified admission reasons: trauma, severe burns, severe traumatic brain injury                                              | >16              | Erythropoiesis stimulating agents for haematopoietic indications / drugs: Darbeoetin alfa, Epoetin alfa, rHuEPO or non-rHuEPO; prescription of any erythropoiesis stimulating agent (1x) | No erythropoiesis stimulating agents                                                                    | Mortality; at 30 days or not specified | Retrospective cohort, retrospective cohort with historic controls | 30 days or not reported         |
| Moberley 2013 (89)   | Pneumococcal polysaccharide vaccines | Invasive pneumococcal disease        | 2 | 58,606   | NR    | Male and female elderly general population / members of health insurance or community dwelling / setting: in high-income countries                                                                                                  | >65              | Pneumococcal vaccine: 23-valent PPV                                                                                                                                                      | No vaccination                                                                                          | Invasive pneumococcal disease          | Prospective cohort, retrospective cohort                          | <3,3 years                      |
| Molnar 2015 (35)     | Neoral (Cyclosporin)                 | Acute rejection of kidney transplant | 2 | 219      | 72    | Adult population with kidney transplant / either incident transplants (without graft failure within 14 days post transplantation) or all living recipients / setting: Macedonia and USA                                             | 38.6-51.2 (mean) | Neoral (Cyclosporin)                                                                                                                                                                     | Equoral, Gengraf (generic Cyclosporin)                                                                  | Acute rejection of kidney transplant   | Retrospective cohort with historic controls                       | 0.5 years                       |
| Navarese 2013 (90)   | Early intervention for NSTEMI-ACS    | All-cause mortality                  | 4 | 77,499   | 2,995 | Male and female population with non-ST elevation ACS / undergoing PCI, CABG or medical treatment / with or without: positive biomarkers, metabolic disease, ST-segment depression, medication with glycoprotein IIb/IIIa inhibitors | 62.5-68 (mean)   | Early intervention for NSTEMI-ACS / time to intervention $\leq 24$ or $< 24$ hours (3x); 23.4 hours (mean, 1x)                                                                           | Delayed intervention / time to intervention $> 24$ hours (2x); $> 48$ hours (1x); 46.3 hours (mean, 1x) | Mortality                              | Observational analysis of RCT, prospective cohort                 | Hospital discharge to 12 months |
| Navarese 2013 (90)   | Early intervention for NSTEMI-ACS    | Myocardial infarction                | 3 | 70,253   | 3,182 | Male and female population with non-ST elevation ACS / undergoing PCI, CABG or medical treatment / with or without: positive biomarkers, metabolic disease, ST-segment depression, medication with glycoprotein IIb/IIIa inhibitors | 62.5-68 (mean)   | Early intervention for NSTEMI-ACS / time to intervention $\leq 24$ hours (2x); 23.4 hours (mean, 1x)                                                                                     | Delayed intervention / time to intervention $> 24$ hours (2x); 46.3 hours (mean, 1x)                    | Myocardial infarction                  | Observational analysis of RCT, prospective cohort                 | Hospital discharge to 12 months |

|                         |                                                        |                           |    |        |     |                                                                                                                                                                                                                                     |                                 |                                                                                       |                                                                                      |                                               |                                                     |                                           |
|-------------------------|--------------------------------------------------------|---------------------------|----|--------|-----|-------------------------------------------------------------------------------------------------------------------------------------------------------------------------------------------------------------------------------------|---------------------------------|---------------------------------------------------------------------------------------|--------------------------------------------------------------------------------------|-----------------------------------------------|-----------------------------------------------------|-------------------------------------------|
| Navarese 2013 (90)      | Early intervention for NSTEMI-ACS                      | Major bleeding            | 3  | 21,147 | 916 | Male and female population with non-ST elevation ACS / undergoing PCI, CABG or medical treatment / with or without: positive biomarkers, metabolic disease, ST-segment depression, medication with glycoprotein IIb/IIIa inhibitors | 62.5-67.5 (mean)                | Early intervention for NSTEMI-ACS / time to intervention $\leq$ 24 hours or <24 hours | Delayed intervention / time to intervention >24 hours (2x); >48 hours (1x)           | Major bleeding                                | Observational analysis of RCT, prospective cohort   | 30 days to 12 months                      |
| Nelson 2010 (36)        | Caesarean section                                      | Anal incontinence, feces  | 11 | 16,832 | NR  | Pregnant women / primipara only or all pregnancies / reported excluding women with prepartum incontinence (1x)                                                                                                                      | 42.7 (mean for 1x)/ NR          | Caesarean section                                                                     | Vaginal delivery                                                                     | Fecal incontinence                            | Prospective cohort, cohort study                    | 2 weeks to 12 years (range)               |
| Nelson 2010 (36)        | Caesarean section                                      | Anal incontinence, flatus | 4  | 5,594  | NR  | Pregnant women / primipara only or all pregnancies / reported excluding women with prepartum incontinence (1x)                                                                                                                      | NR                              | Caesarean section                                                                     | Vaginal delivery                                                                     | Incontinence of flatus                        | Prospective cohort, cohort study                    | 3 months -10 years                        |
| Nieuwenhuijse 2014 (37) | Ceramic-on-ceramic bearings for total hip arthroplasty | Harris Hip Score          | 3  | 403    | NR  | Male and female population / mostly with osteoarthritis / population including all patients (1x), only <70 years (1x) or with high activity level only (1x)                                                                         | 52.5-68.3 (mean)/ 37-79 (range) | Ceramic-on-ceramic bearings for total hip arthroplasty                                | Metal-on-polyethylene or ceramic-on-polyethylene bearings for total hip arthroplasty | Harris-Hip Score at short-,mid-, or long-term | Retrospective cohort                                | 3.3-10.9 years (mean)/ 2-12 years (range) |
| Nieuwenhuijse 2014 (37) | High-flexion total knee arthroplasty                   | Flexion                   | 26 | 3,079  | NR  | Male and female population / mostly with osteoarthritis / mostly all patients regardless of age or activity status                                                                                                                  | 63.9-72.9 (mean)                | High flexion prosthesis for total knee arthroplasty                                   | Standard prosthesis for total knee arthroplasty                                      | Flexion in degrees at short- or mid-term      | Retrospective cohort, cohort with historic controls | 0-5.7 years (mean follow-up)              |
| Nieuwenhuijse 2014 (37) | Gender-specific total knee arthroplasty                | Flexion-extension range   | 2  | 274    | NR  | Female (49.6-100%) and male population / mostly with osteoarthritis / without: cancer (1x) fracture (1x)                                                                                                                            | 64.8-68.1 (mean)                | Gender-specific prosthesis for total knee arthroplasty                                | Non-gender specific prosthesis for total knee arthroplasty                           | Flexion-extension range of motion, short-term | Retrospective cohort                                | 0.5-1 year (mean)                         |

|                   |                                     |                     |    |        |      |                                                                                                                                            |                               |                                                                                                                                                                                                                                                             |                                                                                                                                                       |                                                   |                                                                                                        |                     |
|-------------------|-------------------------------------|---------------------|----|--------|------|--------------------------------------------------------------------------------------------------------------------------------------------|-------------------------------|-------------------------------------------------------------------------------------------------------------------------------------------------------------------------------------------------------------------------------------------------------------|-------------------------------------------------------------------------------------------------------------------------------------------------------|---------------------------------------------------|--------------------------------------------------------------------------------------------------------|---------------------|
| Nikooie 2019 (55) | Second generation antipsychotics    | Sedation            | 3  | 162    | 16   | Male and female population with delirium / health status: all inpatients with delirium (1x), with cancer (1x), with physical diseases (1x) | 64-71 (mean)                  | Second generation antipsychotics / drugs: Olanzapine 4.9-8.2mg/day; Quetiapine 26.7mg/day; Risperidone 0.6mg/day (mean doses)                                                                                                                               | Haloperidol / 0.9-4.9mg/day (mean); 1.5-10mg/day (range)                                                                                              | Excessively sedated, sedation                     | Prospective cohort, retrospective cohort                                                               | NR                  |
| Nikooie 2019 (55) | Second generation antipsychotics    | Neurologic outcomes | 5  | 2,679  | 138  | Male and female population with delirium / health status: all inpatients with delirium (2x), with cancer (2x), with physical diseases (1x) | 62-74 (mean)                  | Second generation antipsychotics / drugs, doses (reported as mean or as maximum dose): Risperidone 0.6-1mg/day, max. 1.4mg/day; Olanzapine 3.5-8.2mg/day, max. 10.2mg/day; Aripiprazole 15.2 mg/day, max. 7.2mg/day; Quetiapine 26.7 mg/day, max 71.8mg/day | Haloperidol / 0.9-4.6mg/day (mean); 1.5-10mg/day (range)                                                                                              | Dystonia, Extrapyramidal symptoms                 | Prospective cohort, retrospective cohort                                                               | NR                  |
| Ochen 2019 (91)   | Surgery for achilles tendon rupture | Re-rupture          | 18 | 14,847 | 397  | Mostly male (~74%) young adult and middle-aged population with acute achilles tendon rupture / elderly population only (1x)                | 29.7-72 (mean)/ 11-85 (range) | Surgical Achilles tendon repair / open or minimalinvas surgery                                                                                                                                                                                              | Nonoperative treatment / cast, brace or orthosis for 6-13 weeks; mostly without early full-weightbearing; partly with early functional rehabilitation | Re-rupture                                        | Prospective cohort, observational analysis of RCT, retrospective cohort, cohort with historic controls | 12-95 months (mean) |
| Ochen 2019 (91)   | Surgery for achilles tendon rupture | Complications       | 15 | 14,559 | 429  | Mostly male (~74%) young adult and middle-aged population with acute achilles tendon rupture / elderly population only (1x)                | 34.8-72 (mean)/ 11-85 (range) | Surgical Achilles tendon repair / open or minimalinvas surgery                                                                                                                                                                                              | Nonoperative treatment / cast, brace or orthosis for 6-13 weeks; mostly without early full-weightbearing; partly with early functional rehabilitation | Complications (Infections, Thrombosis and others) | Prospective cohort, observational analysis of RCT, retrospective cohort, cohort with historic controls | 12-95 months (mean) |
| Pittas 2010 (60)  | Vitamin D                           | Hypertension        | 3  | 2,553  | >407 | Generally healthy male and female population (from the health professionals follow-up study (USA) and the nurses health study (USA))       | 43-65 (mean)/ 30-75 (range)   | High vitamin D status (>75 or 81 nmol/L)                                                                                                                                                                                                                    | Low vitamin D status (<37-51 nmol/L)                                                                                                                  | Incident hypertension; validated self-report      | Prospective cohort, nested case-control                                                                | 7-8 years (mean)    |

|                     |                          |                         |   |         |       |                                                                                                                                                                                                                                   |                |                                                                                                                                                                                                           |                                                                                                             |                                                                          |                                                                                         |                               |
|---------------------|--------------------------|-------------------------|---|---------|-------|-----------------------------------------------------------------------------------------------------------------------------------------------------------------------------------------------------------------------------------|----------------|-----------------------------------------------------------------------------------------------------------------------------------------------------------------------------------------------------------|-------------------------------------------------------------------------------------------------------------|--------------------------------------------------------------------------|-----------------------------------------------------------------------------------------|-------------------------------|
| Raman 2013 (38)     | Carotid endarterectomy   | Ipsilateral stroke      | 2 | 356     | 25    | Male and female population with asymptomatic carotid artery stenosis / including patients with contralateral symptomatic lesions / with or without: metabolic disease, hypertension, smokers and non-smokers                      | 60-69.3 (mean) | Carotid endarterectomy plus medical therapy (not further specified)                                                                                                                                       | Medical therapy (not further specified)                                                                     | Ipsilateral stroke (including any stroke within 30d)                     | Retrospective cohort                                                                    | 2-3.8 years (mean)            |
| Raman 2013 (38)     | Carotid endarterectomy   | Stroke                  | 3 | 490     | 52    | Male and female population with asymptomatic carotid artery stenosis / including patients with contralateral symptomatic lesions / with or without: high-grade stenosis, metabolic disease, hypertension, smokers and non-smokers | 68-70 (mean)   | Carotid endarterectomy plus medical therapy (not further specified)                                                                                                                                       | Medical therapy (not further specified)                                                                     | Any stroke (including any death within 30 days)                          | Retrospective cohort                                                                    | 3-5 years (mean)              |
| Raman 2013 (38)     | Carotid artery stenting  | Periprocedural stroke   | 5 | 372,257 | 3,527 | Male and female population with asymptomatic carotid artery stenosis / broad population from administrative datasets or registries / with or without: CAD, hypertension, metabolic disease, smokers and non-smokers               | 69.8-72 (mean) | Carotid artery stenting                                                                                                                                                                                   | Carotid endarterectomy                                                                                      | Any periprocedural stroke                                                | Retrospective cohort, retrospective database cohort                                     | <30 days                      |
| Schweizer 2013 (39) | Nasal decontamination    | Surgical site infection | 6 | 20,171  | 137   | Male and female population at orthopedic or cardiac surgery wards                                                                                                                                                                 | NR             | Nasal Mupirocin / dose: 2% or not specified (2x) / start: for 3-5 days preoperatively (4x) / treatment for all patients regardless of MRSA/ MSSA carrier status (4x) or for MRSA/ MSSA carriers only (2x) | No use of nasal Mupirocin                                                                                   | Wound infections, mostly assessed by Center for Disease Control criteria | Prospective cohort, retrospective cohort                                                | NR                            |
| Schweizer 2013 (39) | Glycopeptide prophylaxis | Surgical site infection | 7 | 27,971  | 481   | Male and female population at orthopedic or cardiac surgery wards                                                                                                                                                                 | NR             | Prophylactic treatment with Vancomycin or Teicoplanin (1x) / alone or with Rifampicin, Cephalosporine or non-specified antimicrobial agent                                                                | Prophylactic antibiotic treatment / mostly Cephalosporins or other Beta-lactam antibiotics; Vancomycin (1x) | Wound infections, mostly assessed by Center for Disease Control criteria | Prospective cohort, retrospective cohort, retrospective cohort with historical controls | 60 days, mostly not specified |

|                   |                        |                                              |   |        |     |                                                                                                                                                                                                                                                                        |           |                                                                                                                                                                                                                                                                                 |                                                                                                                                                                                                                                                                                     |                                                                                                                                                                                                      |                                                                         |                                                 |
|-------------------|------------------------|----------------------------------------------|---|--------|-----|------------------------------------------------------------------------------------------------------------------------------------------------------------------------------------------------------------------------------------------------------------------------|-----------|---------------------------------------------------------------------------------------------------------------------------------------------------------------------------------------------------------------------------------------------------------------------------------|-------------------------------------------------------------------------------------------------------------------------------------------------------------------------------------------------------------------------------------------------------------------------------------|------------------------------------------------------------------------------------------------------------------------------------------------------------------------------------------------------|-------------------------------------------------------------------------|-------------------------------------------------|
| Silvain 2012 (40) | Enoxaparin             | All-cause mortality                          | 7 | 11,074 | 476 | Mostly male population, with: acute CHD/ MI and undergoing urgent PCI / without: cardiogenic shock (2x), population with MI post-fibrinolysis (1x), previous thrombolysis or anticoagulation (2x) / with or without: metabolic disease                                 | NR        | Enoxaparin / IV or SC / dosing: single bolus (0.5-1mg/kg or 30 mg) or repeated administration (every 12h) / partly additional dose of unfractionated Heparin or Enoxaparin during PCI / additional anticoagulation for most patients of both groups (e.g. Aspirin, Clopidogrel) | Unfractionated Heparin / IV / dosing: 60-70 IU/kg or 5,000 IU bolus / with subsequent continued administration during PCI with 12 IU/kg/h or additional bolus with 50-70 IU/kg / treatment control: with or without titration to activated clotting time (200-300s) or not reported | All-cause mortality                                                                                                                                                                                  | Prospective cohort, observational analysis of RCT, cohort               | In-hospital to 15 months                        |
| Silvain 2012 (40) | Enoxaparin             | Major bleeding                               | 7 | 11,376 | 388 | Mostly male population, with: acute CHD/ MI (6x) and undergoing urgent PCI/ partly: PCI after fibrinolysis (1x), elective PCI (1x), high risk MI (1x), without cardiogenic shock (1x), prior anticoagulation or thrombolysis (2x) / with or without: metabolic disease | NR        | Enoxaparin / IV or SC / dosing: single bolus (0.5-1mg/kg or 30 mg) or repeated administration (every 12h) / partly additional dose of unfractionated Heparin or Enoxaparin during PCI / additional anticoagulation for most patients of both groups (e.g. Aspirin, Clopidogrel) | Unfractionated Heparin / IV / dosing: 60-70IU/kg or 5,000 IU bolus / subsequent continued administration or additional bolus during PCI (12 IU/kg/h or 50-70 UI/kg bolus) / treatment control: with or without titration to activated clotting time 200-300s or not reported        | Major bleeding (TIMI or individual study definition)                                                                                                                                                 | Prospective cohort, observational analysis of RCT, cohort               | In-hospital to 15 months                        |
| Silvain 2012 (40) | Enoxaparin             | All-cause mortality or myocardial infarction | 7 | 8,707  | 543 | Mostly male population, with CHD and undergoing PCI / mostly urgent PCI for MI (6x) / partly: elective PCI (1x), without: cardiogenic shock (1x), prior thrombolysis or anticoagulation (1x) / with or without: metabolic disease                                      | NR        | Enoxaparin / IV or SC / dosing: single bolus (0.5-1mg/kg) or repeated administration (every 12h) / partly additional dose of unfractionated Heparin or Enoxaparin during PCI / additional anticoagulation for most patients of both groups (e.g. Aspirin, Clopidogrel)          | Unfractionated Heparin / IV / dosing: 60-70IU/kg or 5,000 IU bolus / subsequent continued administration or additional bolus during PCI (12 IU/kg/h or 50-70 UI/kg bolus) / treatment control: with or without titration to activated clotting time 200-300s or not reported        | Death or Myocardial infarction                                                                                                                                                                       | Prospective cohort, cohort study                                        | In-hospital to 15 months                        |
| Suthar 2012 (26)  | Antiretroviral therapy | Tuberculosis infection                       | 9 | 21,348 | 866 | Male and female population / with or without advanced HIV infection (7x), CD4 count <200 to >500 cells/ $\mu$ L / partly: without advanced HIV infection (1x), patients with signs of active tuberculosis infection (1x) / setting: developing countries               | $\geq 15$ | ART with $\geq 3$ antiretroviral drugs / ART: not specified or consisting of two nucleoside reverse transcriptase inhibitors plus either a non-nucleoside reverse transcriptase inhibitor or a protease inhibitor                                                               | Population not receiving ART                                                                                                                                                                                                                                                        | Tuberculosis infection / various definitions, mostly as a combination of the following items: clinical signs and response to therapy, radiological, microbiological, histological, autopsy confirmed | Prospective cohort, retrospective cohort, observational analysis of RCT | 4.75-22.8 months (median); 13-60 months (range) |

|                           |                    |                                        |   |         |       |                                                                                                                                                                                                                                                                                                                                                      |               |                                                                                                                                                                                         |                                                                                                                                                                   |                                                             |                                                      |                                                                                           |
|---------------------------|--------------------|----------------------------------------|---|---------|-------|------------------------------------------------------------------------------------------------------------------------------------------------------------------------------------------------------------------------------------------------------------------------------------------------------------------------------------------------------|---------------|-----------------------------------------------------------------------------------------------------------------------------------------------------------------------------------------|-------------------------------------------------------------------------------------------------------------------------------------------------------------------|-------------------------------------------------------------|------------------------------------------------------|-------------------------------------------------------------------------------------------|
| Te Morenga 2013 (61)      | Sugar              | Weight gain                            | 4 | 149,305 | NR    | Mostly female generally healthy population / younger (university graduates, nurses) and older adults / without: diabetes (3x), severe diseases (3x) (cancer, heart disease)                                                                                                                                                                          | 21-74 (range) | High intake of sugar sweetened beverages (including sugar sweetened soft drinks, fruit juice and others e.g. iced tea)                                                                  | Low intake of sugar sweetened beverages                                                                                                                           | Weight gain                                                 | Prospective cohort                                   | 4-6 years (range)                                                                         |
| Te Morenga 2013 (61)      | Sugar              | Body Mass Index                        | 4 | >4,094  | NR    | Male and female children and adolescents / general population / without underweight (BMI < 5th percentile) (1x)                                                                                                                                                                                                                                      | 2-14 (range)  | Risk by one serving/day or 100g/day intake increase of sugar sweetened beverages (soft drinks, fruit juice) / intake assessment by food frequency questionnaire, 3 day diet record (1x) | NA (see intervention)                                                                                                                                             | Change in BMI                                               | Prospective cohort, prospective cohort nested in RCT | 1-10 years (range)                                                                        |
| Thomas 2010 (92)          | Influenza vaccines | Influenza-like illness                 | 1 | 12,742  | 1,442 | Elderly population / institutionalised in two types of long-term nursing care facilities (requiring standard care or advanced care) / age and gender not reported / 0 to >80% of residents with influenza vaccination / setting: Japan                                                                                                               | NR            | Number of health care workers vaccinated per facility $\geq 10$                                                                                                                         | Number of health care workers vaccinated per facility <10                                                                                                         | Influenza-like illness in residents (not further specified) | Prospective cohort                                   | 3 months                                                                                  |
| Tickell-Painter 2017 (93) | Mefloquine         | Discontinuation due to adverse effects | 9 | 7,785   | 934   | Generally healthy adults / short-term travellers or longer stay (soldiers, volunteers) / further specifications: soldiers in active service (2x), travellers from Japan, Peace Corps volunteers (2x), healthy adult travellers (without severe underlying disease) (1x), medical students with stay abroad (1x), short-term travellers from USA (1x) | 18-65 (range) | Mefloquine / dose 250mg/week or not specified / duration: minimum 1 week before to 4 weeks after travelling                                                                             | Atovaquone-proguanil / dose and duration mostly not specified (8x) / partly: 250mg Atovaquone+100mg Proguanil daily for 2 days before to 1 week after travel (1x) | Discontinuation of study drug due to adverse effects        | Prospective cohort, retrospective cohort, cohort     | Reported as duration of exposure to malaria: 10-224 days (range), 2 weeks-6 months (mean) |



|                           |                                 |                                   |   |           |        |                                                                                                                                                       |                  |                                                                                                              |                                                                                                                         |                                                                                             |                                                                      |                                                                                                                     |
|---------------------------|---------------------------------|-----------------------------------|---|-----------|--------|-------------------------------------------------------------------------------------------------------------------------------------------------------|------------------|--------------------------------------------------------------------------------------------------------------|-------------------------------------------------------------------------------------------------------------------------|---------------------------------------------------------------------------------------------|----------------------------------------------------------------------|---------------------------------------------------------------------------------------------------------------------|
| Tickell-Painter 2017 (93) | Mefloquine                      | Serious adverse events or effects | 2 | 1,167     | 7      | Travellers / general population / without: known adverse reactions to study drug or adverse reaction in the first week, pregnancy                     | >18/ NR          | Mefloquine / dose and duration: 250mg/week for 1 week before to 4 weeks post travel (1x); not specified (1x) | Non-users of antimalarials (travellers to countries with or without malaria or not specified)                           | Serious adverse events                                                                      | Retrospective cohort                                                 | Reported as: duration of exposure to malaria: 1 to 9 weeks (1x) (range)/ monitoring until 20 weeks post-travel (1x) |
| Tickell-Painter 2017 (93) | Mefloquine                      | Nausea                            | 3 | 1,901     | 301    | Travellers / general population / without: known adverse reactions to study drug, serious adverse reaction to Mefloquine in the first week, pregnancy | >18/ NR          | Mefloquine / dose: 250mg/week (2x) / duration: 1 week before to 4 weeks post-travel (1x)                     | Non-users of antimalarials (travellers to countries with or without malaria without use of study drug or not specified) | Nausea                                                                                      | Prospective cohort, retrospective cohort                             | Reported as: duration of exposure to malaria: 1 to 9 weeks (1x) (range)/ monitoring until 20 weeks post-travel (1x) |
| Tricco 2018 (45)          | Live-attenuated zoster vaccines | Suspected Herpes Zoster           | 3 | 1,934,183 | 55,228 | Male and female population / immunocompetent (1x) immunocompromised (1x) or mixed immunocompetent and immunocompromised (1x)                          | 67.7-74.0 (mean) | Live zoster vaccine (Zostavax) / mostly single dose                                                          | No vaccination                                                                                                          | Suspected herpes zoster                                                                     | Retrospective cohort, cohort                                         | 36-102 months                                                                                                       |
| Vinceti 2018 (59)         | Selenium                        | Cancer                            | 7 | 76,239    | 1,940  | General population / health status: no history of cancer (2x) or community-dwelling (1x) or not specified                                             | 15-74 (range)    | High selenium (serum and plasma status)                                                                      | Low selenium (serum and plasma status)                                                                                  | Any cancer; stomach, rectal, lung, colon and bladder cancer                                 | Cohort-subcohort controlled study, nested case-control               | 5-20 years                                                                                                          |
| Vinceti 2018 (59)         | Selenium                        | Cancer mortality                  | 7 | 183,863   | 3,869  | General population / health status: no history of cancer (2x), adult haemodialysis patients (1x) or not specified                                     | 5-90 (range)     | High selenium (selenium intake, serum and plasma status)                                                     | Low selenium (selenium intake, serum and plasma status)                                                                 | Mortality from any cancer; malignant disease-related death, cancer deaths, cancer mortality | Cohort, cohort-subcohort controlled study, nested case-control       | 4-14 years                                                                                                          |
| Vinceti 2018 (59)         | Selenium                        | Colorectal cancer                 | 6 | 712,746   | 2,627  | General population / mostly without history of cancer                                                                                                 | 25-70 (range)    | High selenium (serum or toenail status, selenium supplement)                                                 | Low selenium (serum or toenail status, selenium supplement)                                                             | Colorectal cancer                                                                           | Cohort study, cohort-subcohort controlled study, nested case-control | 2-20 years                                                                                                          |

|                  |                                    |                         |    |         |       |                                                                                                                                                                                                                                                                                            |                                           |                                                                                                                                                                                                                                      |                                                                                                                                   |                              |                                                             |                    |
|------------------|------------------------------------|-------------------------|----|---------|-------|--------------------------------------------------------------------------------------------------------------------------------------------------------------------------------------------------------------------------------------------------------------------------------------------|-------------------------------------------|--------------------------------------------------------------------------------------------------------------------------------------------------------------------------------------------------------------------------------------|-----------------------------------------------------------------------------------------------------------------------------------|------------------------------|-------------------------------------------------------------|--------------------|
| Wilson 2011 (41) | Traditional birth attendants       | Perinatal mortality     | 1  | 1,028   | 51    | Women giving birth in rural low-income setting in Brazil                                                                                                                                                                                                                                   | 20-34 (range for 69.2%)                   | Birth assisted by traditional birth attendant / experience: trained with five one-hour meetings, practical experience at mini-maternity unit                                                                                         | Birth not assisted by traditional birth attendant (assistance by neighbour or relative)                                           | Perinatal mortality          | Prospective cohort                                          | NR                 |
| Wilson 2011 (41) | Traditional birth attendants       | Neonatal mortality      | 2  | 4,032   | 63    | Women giving birth in rural low-income setting in Brazil, Mozambique                                                                                                                                                                                                                       | 26.6-27.3 (mean)/ 20-34 (range for 69.2%) | Birth assisted by traditional birth attendant or access to trained traditional birth attendant / experience: trained with five one-hour meetings, practical experience at mini-maternity unit (1x); three-week training program (1x) | Birth not assisted by traditional birth attendant (assistance by neighbour or relative/ no access to traditional birth attendant) | Neonatal mortality           | Prospective cohort, retrospective cohort                    | NR                 |
| Wilson 2019 (42) | Unicompartmental knee arthroplasty | Venous thromboembolism  | 8  | 261,684 | 2,536 | Male and female adults mostly with osteoarthritis / any health status but sparse information / mean BMI: 27.7-32.6 / mostly primary arthroplasty only / partly: without fractures and emergency procedures, intact anterior cruciate ligament only (1x)                                    | 63.96-79.7 (mean)/47-86 (range)           | Unicompartmental knee arthroplasty                                                                                                                                                                                                   | Total knee arthroplasty                                                                                                           | Venous thromboembolism       | Retrospective database cohort, retrospective cohort, cohort | 30 days to 5 years |
| Wilson 2019 (42) | Unicompartmental knee arthroplasty | Flexion-extension range | 11 | 3,891   | NR    | Male and female adults mostly with osteoarthritis / any health status but sparse information / mean BMI: 24.1-40.5 / all arthroplasties or primary arthroplasties only / partly: intact anterior cruciate ligament only, only obese population BMI > 35 (1x), elderly adults >70 only (1x) | 59.7-80.1 (mean)/ 38-93 (range)           | Unicompartmental knee arthroplasty                                                                                                                                                                                                   | Total knee arthroplasty                                                                                                           | Range of movement in degrees | Retrospective cohort, cohort                                | 2-10 years         |

|                     |                                                    |                                  |   |        |    |                                                                                                                                                                                          |                  |                                                                                                           |                                                           |                                                                |                                                             |                      |
|---------------------|----------------------------------------------------|----------------------------------|---|--------|----|------------------------------------------------------------------------------------------------------------------------------------------------------------------------------------------|------------------|-----------------------------------------------------------------------------------------------------------|-----------------------------------------------------------|----------------------------------------------------------------|-------------------------------------------------------------|----------------------|
| Wilson 2019<br>(42) | Unicompartmental knee arthroplasty                 | Operation duration               | 8 | 56,349 | NR | Male and female adults / any health status but sparse information / mean BMI: 29.5-40.5 / mostly with primary knee arthroplasty only / elderly only (>70/>65) (2x)                       | 59.7-80.1 (mean) | Unicompartmental knee arthroplasty                                                                        | Total knee arthroplasty                                   | Operation duration                                             | Retrospective cohort, retrospective database cohort, cohort | 30 days to 30 months |
| Yank 2011<br>(44)   | Recombinant factor VII                             | All-cause mortality              | 2 | 182    | 19 | Male and female population with refractory bleeding after cardiac surgery                                                                                                                | 56-73.2 (mean)   | Recombinant factor VIIa / dose: 18-51.1 µg/kg (mean) / administered after surgery for refractory bleeding | No recombinant factor VIIa use                            | In-hospital mortality                                          | Retrospective cohort                                        | NR                   |
| Yank 2011<br>(44)   | Recombinant factor VII                             | Thromboembolism                  | 2 | 182    | 15 | Male and female population with refractory bleeding after cardiac surgery                                                                                                                | 56-73.2 (mean)   | Recombinant factor VIIa / dose: 18-51.1 µg/kg (mean) / administered after surgery for refractory bleeding | No recombinant factor VIIa use                            | Thromboembolic events                                          | Retrospective cohort                                        | NR                   |
| Zhang 2016<br>(94)  | Everolimus-eluting bioresorbable vascular scaffold | Stent thrombosis                 | 3 | 2,767  | 30 | Male (>67%) and female population / mixed population with either MI or angina pectoris / with or without: metabolic disease, hypertension, smokers or non-smokers / setting: "worldwide" | 54-62.2 (mean)   | Coronary stenting with Everolimus-eluting bioresorbable vascular scaffold                                 | Coronary stenting with Everolimus-eluting metallic stents | Stent thrombosis (definite or probable); not further specified | Retrospective cohort, cohort                                | 6-12 months          |
| Zhang 2016<br>(94)  | Everolimus-eluting bioresorbable vascular scaffold | All-cause mortality              | 4 | 1,580  | 26 | Male (>67%) and female population / mixed population with either MI or angina pectoris / with or without: metabolic disease, hypertension, smokers or non-smokers / setting: "worldwide" | 54-64.2 (mean)   | Coronary stenting with Everolimus-eluting bioresorbable vascular scaffold                                 | Coronary stenting with Everolimus-eluting metallic stents | All-cause death                                                | Retrospective cohort, cohort                                | 6-12 months          |
| Zhang 2016<br>(94)  | Everolimus-eluting bioresorbable vascular scaffold | Coronary heart disease mortality | 4 | 2,951  | 31 | Male (>67%) and female population / mixed population with either MI or angina pectoris / with or without: metabolic disease, hypertension, smokers or non-smokers / setting: "worldwide" | 54-64.2 (mean)   | Coronary stenting with Everolimus-eluting bioresorbable vascular scaffold                                 | Coronary stenting with Everolimus-eluting metallic stents | Cardiac death                                                  | Retrospective cohort, cohort                                | 6-12 months          |

|                 |                                    |                          |    |        |    |                                                                                                                                                                               |                               |                                                                                                                                                                     |                                      |                              |                                                                         |                              |
|-----------------|------------------------------------|--------------------------|----|--------|----|-------------------------------------------------------------------------------------------------------------------------------------------------------------------------------|-------------------------------|---------------------------------------------------------------------------------------------------------------------------------------------------------------------|--------------------------------------|------------------------------|-------------------------------------------------------------------------|------------------------------|
| Zhang 2017 (95) | Percutaneous coronary intervention | All-cause mortality      | 17 | 16,467 | NR | Male (65-82.5%) and female population with CHD / with or without: acute MI, metabolic disease and hypertension, prior MI 6.9-38.1%, current smokers: 17-53.6%                 | 60.8-78 (mean)/ 75-88 (range) | Percutaneous coronary intervention / stent types: mostly bare metal stent or early-generation drug eluting stent; partly: second-generation drug eluting stent (1x) | Coronary artery bypass graft surgery | All-cause mortality          | Prospective cohort, retrospective cohort                                | 1-9.7 years (mean)           |
| Zhang 2017 (95) | Percutaneous coronary intervention | Cardiovascular mortality | 5  | 6,605  | NR | Male (76.3-82.5%) and female population with CHD / without: acute MI (4x) / with or without: metabolic disease, hypertension, prior MI 16-38.1%, current smokers: 25-53.6%    | 62.2-69.4 (mean)              | Percutaneous coronary intervention / stent types: mostly bare metal stent or early-generation drug eluting stent                                                    | Coronary artery bypass graft surgery | Cardiovascular mortality     | Prospective cohort, retrospective cohort                                | 1-7.1 years (median/mean)    |
| Zhang 2017 (95) | Percutaneous coronary intervention | Myocardial infarction    | 5  | 6,637  | NR | Male (76.3-82.5%) and female population with CHD / without: acute MI (3x) / with or without: metabolic disease, hypertension, prior MI 20.1-38.1%, current smokers: 6.9-53.6% | 60.8-69.4 (mean)              | Percutaneous coronary intervention / stent types: mostly bare metal stent or early-generation drug eluting stent                                                    | Coronary artery bypass graft surgery | Myocardial infarction        | Prospective cohort, retrospective cohort                                | 3-7.1 years (median/mean)    |
| Ziff 2015 (96)  | Digoxin                            | All-cause mortality      | 8  | 34,008 | NR | Survivors of MI (6x), or population with ACS (1x) / with or without: heart failure, atrial fibrillation, metabolic disease                                                    | 53-75 (mean)                  | Digoxin                                                                                                                                                             | No digoxin use                       | All-cause mortality          | Prospective cohort, observational analysis of RCT, retrospective cohort | 1-12 years                   |
| Ziff 2015 (96)  | Digoxin                            | Cardiovascular mortality | 3  | 11,399 | NR | Survivors of MI with or without heart failure (2x) and atrial fibrillation / elderly without heart failure and in sinus rhythm (1x)                                           | 53-75 (mean)                  | Digoxin                                                                                                                                                             | No digoxin use                       | Cardiovascular mortality     | Prospective cohort, observational analysis of RCT                       | 2-12 years (mean follow-up)  |
| Ziff 2015 (96)  | Digoxin                            | Hospital admission       | 4  | 6,584  | NR | Mostly population with acute or chronic heart failure / population with or without: atrial fibrillation                                                                       | 63-76 (mean)                  | Digoxin                                                                                                                                                             | No digoxin use                       | All-cause hospital admission | Prospective cohort, observational analysis of RCT, retrospective cohort | 1-8.2 years (mean follow-up) |

---

ACS= acute coronary syndrome; AIDS= acquired immune deficiency syndrome; ART= antiretroviral therapy; ASA= american society of anesthesiologists; BCG= bacillus calmette-guérin; BMI= body mass index; CABG= coronary artery bypass graft; CAD= coronary artery disease; CD4= cluster of differentiation 4; CHD= coronary heart disease; COPD= chronic obstructive pulmonary disease; CVD= cardiovascular disease; DDP-4= dipeptidyl peptidase 4; DTP= diphtheria, tetanus, pertussis; eGFR= estimated glomerular filtration rate; GDM= gestational diabetes mellitus; HbA1c= hemoglobin A1c; HIV= human immunodeficiency virus; HSV-2= herpes simplex virus type 2; ICU= intensive care unit; MI= myocardial infarction; MRI= magnetic resonance imaging; MRSA= methicillin resistant staphylococcus aureus; MSSA= methicillin sensitive staphylococcus aureus; NA= not applicable; NOS= newcastle-ottawa scale; NR= not reported; NSAID= non-steroidal anti-inflammatory drug; NSTEMI= non-ST elevation acute coronary syndrome; NYHA= new york heart association (stage); PCI= percutaneous coronary intervention; PPV= pneumococcal polysaccharide vaccine; SGLT-2= sodium glucose transporter 2; SPMSQ= short portable mental status questionnaire; STAT= instantly; STEMI= ST elevation myocardial infarction;  $\mu\text{L}$ = microliter WHO= world health organization // units: g= gram; IU= international units; kcal= kilocalorie; kg= kilogram; L= liter; mg= milligram; mL= milliliter; mmol= millimol;  $\mu\text{g}$ = microgram;  $\mu\text{L}$ = microliter // application routes: IM= intramuscular; IV= intravenous; P.O.= per os; SC= subcutaneous.

**Table S7. Risk of bias and certainty of the evidence for included bodies of evidence from cohort studies**

| Reference/ year      | Intervention/ Exposure    | Outcome                          | Certainty / strength of the evidence* | risk of bias tool       | Study quality/ low risk of bias (reported as number of low risk of bias studies per domain)                                                                                                                                     |
|----------------------|---------------------------|----------------------------------|---------------------------------------|-------------------------|---------------------------------------------------------------------------------------------------------------------------------------------------------------------------------------------------------------------------------|
| Abou-Setta 2011 (74) | Nerve block               | Delirium                         | Moderate (RCTs and cohort studies)    | NOS                     | NOS: 8                                                                                                                                                                                                                          |
| Abou-Setta 2011 (74) | Spinal anesthesia         | All-cause mortality              | Low (RCTs and cohort studies)         | NOS                     | NOS: 6.6                                                                                                                                                                                                                        |
| Aburto 2013 (75)     | Low sodium                | All-cause mortality              | Very low                              | Cochrane tool, modified | Selection of participants (6/7), Blinding of participants and personnel (0/7), Blinding of outcome assessment (2/7), Incomplete outcome data (6/7), Selective reporting (7/7), Defining exposure (5/7), Other confounding (5/7) |
| Aburto 2013 (75)     | Low sodium                | Cardiovascular disease           | Very low                              | Cochrane tool, modified | Selection of participants (6/9), Blinding of participants and personnel (1/9), Blinding of outcome assessment (4/9), Incomplete outcome data (8/9), Selective reporting (9/9), Defining exposure (6/9), Other confounding (6/9) |
| Ahmad 2015 (27)      | Intra-aortic balloon pump | All-cause mortality              | NR                                    | Individual tool         | Attempt to control for confounders (6/14)                                                                                                                                                                                       |
| Alexander 2017 (76)  | DHA and EPA               | Coronary heart disease           | NR                                    | NOS                     | NOS: 7.6                                                                                                                                                                                                                        |
| Alexander 2017 (76)  | DHA and EPA               | Coronary heart disease mortality | NR                                    | NOS                     | NOS: 7.4                                                                                                                                                                                                                        |
| Alexander 2017 (76)  | DHA and EPA               | Coronary heart disease incidence | NR                                    | NOS                     | NOS: 7.5                                                                                                                                                                                                                        |

|                            |                                          |                                    |                                          |                    |                                                                                                                                                                                                                       |
|----------------------------|------------------------------------------|------------------------------------|------------------------------------------|--------------------|-----------------------------------------------------------------------------------------------------------------------------------------------------------------------------------------------------------------------|
| Alipanah 2018 (24)         | Self-administered therapy                | Low treatment success              | NR                                       | NOS                | NOS: 6.8                                                                                                                                                                                                              |
| Alipanah 2018 (24)         | Self-administered therapy                | Low treatment completion           | NR                                       | NOS                | NOS: 6.9                                                                                                                                                                                                              |
| Alipanah 2018 (24)         | Self-administered therapy                | All-cause mortality                | NR                                       | NOS                | NOS: 6.9                                                                                                                                                                                                              |
| Anglemyer 2013 (77)        | Antiretroviral therapy                   | HIV infection                      | Moderate                                 | NOS (and Cochrane) | NOS: 6.9 (cochrane: Random sequence generation (0/9); allocation concealment (0/9); blinding (performance bias and detection bias) (0/9); incomplete outcome data (3/9); selective reporting (6/9); other bias (7/9)) |
| Azad 2017 (21)             | Nonnutritive sweeteners                  | Body Mass Index                    | NR                                       | NOS                | NOS: 7                                                                                                                                                                                                                |
| Barnard 2015 (28)          | Surgical abortion by mid-level providers | Failure or incomplete abortion     | Very low (before exclusion of one study) | Cochrane           | Selection bias (0/2), allocation concealment (0/2), blinding of participants and personnel (2/2), blinding of outcome assessment (0/2), incomplete outcome data (0/2), selective reporting (0/2), other bias (0/2)    |
| Barnard 2015 (28)          | Surgical abortion by mid-level providers | Complications                      | Very low (before exclusion of one study) | Cochrane           | Selection bias (0/2), allocation concealment (0/2), blinding of participants and personnel (2/2), blinding of outcome assessment (0/2), incomplete outcome data (1/2), selective reporting (1/2), other bias (1/2)    |
| Barnard 2015 (28)          | Surgical abortion by mid-level providers | Abortion failure and complications | Very low (before exclusion of one study) | Cochrane           | Selection bias (0/3), allocation concealment (0/3), blinding of participants and personnel (3/3), blinding of outcome assessment (0/3), incomplete outcome data (2/3), selective reporting (1/3), other bias (2/3)    |
| Bellemain-Appaix 2012 (48) | Clopidogrel                              | All-cause mortality                | NR                                       | NOS                | NOS: 8.6                                                                                                                                                                                                              |
| Bellemain-Appaix 2012 (48) | Clopidogrel                              | Major bleeding                     | NR                                       | NOS                | NOS: 8.6                                                                                                                                                                                                              |

|                            |                    |                                  |                               |                 |                                                                                                                 |
|----------------------------|--------------------|----------------------------------|-------------------------------|-----------------|-----------------------------------------------------------------------------------------------------------------|
| Bellemain-Appaix 2012 (48) | Clopidogrel        | Coronary heart disease           | NR                            | NOS             | NOS: 8.6                                                                                                        |
| Bellemain-Appaix 2014 (47) | P2Y12 inhibitors   | All-cause mortality              | NR                            | NOS             | NOS: 8.5                                                                                                        |
| Bellemain-Appaix 2014 (47) | P2Y12 inhibitors   | Major bleeding                   | NR                            | NOS             | NOS: 8.5                                                                                                        |
| Bellemain-Appaix 2014 (47) | P2Y12 inhibitors   | Main composite ischemic endpoint | NR                            | NOS             | NOS: 8.5                                                                                                        |
| Bloomfield 2016 (22)       | Mediterranean diet | Breast cancer                    | Low (RCTs and cohort studies) | Individual tool | Population (5/13), outcomes (10/13), measurement (1/13), confounding: (9/13)/ overall: low risk of bias: (3/13) |
| Bolland 2015 (49)          | Calcium            | All fractures                    | NR                            | NA              | NR                                                                                                              |
| Bolland 2015 (49)          | Calcium            | Vertebral fracture               | NR                            | NA              | NR                                                                                                              |
| Bolland 2015 (49)          | Calcium            | Hip fracture                     | NR                            | NA              | NR                                                                                                              |
| Brenner 2014 (29)          | Sigmoidoscopy      | Colorectal cancer mortality      | NR                            | Individual tool | 9/9 (Mean number of quality criteria met)                                                                       |
| Brenner 2014 (29)          | Sigmoidoscopy      | Colorectal cancer incidence      | NR                            | Individual tool | 6.5/9 (Mean number of quality criteria met)                                                                     |



|                      |                          |                          |    |                                                               |                                                                                                                                                                                                                                                                                                                                                                                                                                                                                                             |
|----------------------|--------------------------|--------------------------|----|---------------------------------------------------------------|-------------------------------------------------------------------------------------------------------------------------------------------------------------------------------------------------------------------------------------------------------------------------------------------------------------------------------------------------------------------------------------------------------------------------------------------------------------------------------------------------------------|
| Chowdhury 2012 (78)  | Omega-3                  | Cerebrovascular disease  | NR | Individual tool based on MOOSE, QUATSO, and STROBE guidelines | Modified quality score (for RCTs and cohort studies) (0-6, 6 is best): average: 5.9                                                                                                                                                                                                                                                                                                                                                                                                                         |
| Chowdhury 2014a (79) | $\alpha$ -linolenic acid | Coronary heart disease   | NR | NOS                                                           | NOS: 7.7                                                                                                                                                                                                                                                                                                                                                                                                                                                                                                    |
| Chowdhury 2014a (79) | Omega-3                  | Coronary heart disease   | NR | NOS                                                           | NOS: 8.2                                                                                                                                                                                                                                                                                                                                                                                                                                                                                                    |
| Chowdhury 2014a (79) | Omega-6                  | Coronary heart disease   | NR | NOS                                                           | NOS: 7.9                                                                                                                                                                                                                                                                                                                                                                                                                                                                                                    |
| Chowdhury 2014b (80) | Vitamin D                | All-cause mortality      | NR | NOS                                                           | NOS: 7.3                                                                                                                                                                                                                                                                                                                                                                                                                                                                                                    |
| Chung 2011 (58)      | Vitamin D                | Colorectal cancer        | NR | AHRQ/ STROBE                                                  | Study quality rated as good, fair, or poor: fair (8/9), poor (1/9)                                                                                                                                                                                                                                                                                                                                                                                                                                          |
| Chung 2011 (58)      | Vitamin D                | Breast cancer            | NR | AHRQ/ STROBE                                                  | Study methodological quality rated as good, fair, or poor: fair (3/4), poor (1/4)                                                                                                                                                                                                                                                                                                                                                                                                                           |
| Chung 2016 (56)      | Calcium                  | Cardiovascular mortality | NR | AHRQ/ STROBE                                                  | Percentage of studies with low risk of bias: sampling scheme described (70%), exposure assessors blinded to outcome status (100%), outcome assessors blinded to exposure measurement (0%), food composition database or supplemental composition reported (70%), internal calibration for food frequency questionnaires(100%), justification of final adjusted model selection was reported (70%), clear definition of outcomes (100%), <20% loss to follow-up (100%), a primary outcome is specified (50%) |
| Ding 2017 (81)       | Dairy                    | Systolic blood pressure  | NR | NA                                                            | NR                                                                                                                                                                                                                                                                                                                                                                                                                                                                                                          |

|                     |                                           |                                                      |                                    |                                    |                                                                                                                                                                                                                                                                                    |
|---------------------|-------------------------------------------|------------------------------------------------------|------------------------------------|------------------------------------|------------------------------------------------------------------------------------------------------------------------------------------------------------------------------------------------------------------------------------------------------------------------------------|
| Fenton 2018 (30)    | Radiation therapy                         | Erectile dysfunction                                 | Moderate (RCTs and cohort studies) | AHRQ/ USPSTF (supplemented by NOS) | Study quality rated as good, fair, or poor: good: (2/7), fair (5/7)                                                                                                                                                                                                                |
| Fenton 2018 (30)    | Radical Prostatectomy                     | Urinary incontinence                                 | Moderate (RCTs and cohort studies) | AHRQ/ USPSTF (supplemented by NOS) | Study quality rated as good, fair, or poor: good (2/5), fair (3/5)                                                                                                                                                                                                                 |
| Fenton 2018 (30)    | Radical Prostatectomy                     | Erectile dysfunction                                 | Moderate (RCTs and cohort studies) | AHRQ/ USPSTF (supplemented by NOS) | Study quality rated as good, fair, or poor: good (2/6), fair (4/6)                                                                                                                                                                                                                 |
| Filippini 2017 (43) | Disease-modifying drugs                   | Conversion to clinically definite multiple sclerosis | NR                                 | ROBINS-I                           | Confounding (0/2), selection of participants into the study (1/2), classification of interventions (1/2), deviations from intended interventions (0/2), missing data (0/2), measurement of outcomes (0/2), selection of the reported result (2/2)/ overall: low risk of bias (0/2) |
| Fluri 2010 (31)     | Extracranial-intracranial arterial bypass | All-cause mortality                                  | NR                                 | Individual tool                    | Adequate allocation concealment (10/11)                                                                                                                                                                                                                                            |
| Fluri 2010 (31)     | Extracranial-intracranial arterial bypass | Stroke                                               | NR                                 | Individual tool                    | Adequate allocation concealment (13/15)                                                                                                                                                                                                                                            |
| Fluri 2010 (31)     | Extracranial-intracranial arterial bypass | Stroke mortality or dependency                       | NR                                 | Individual tool                    | Adequate allocation concealment (7/8)                                                                                                                                                                                                                                              |
| Gargiulo 2016 (32)  | Transcatheter aortic valve                | Early all-cause mortality                            | NR                                 | NOS                                | NOS: 8.6; NR (1x)                                                                                                                                                                                                                                                                  |
| Gargiulo 2016 (32)  | Transcatheter aortic valve                | Mid-term all-cause mortality                         | NR                                 | NOS                                | NOS: 8.4                                                                                                                                                                                                                                                                           |
| Gargiulo 2016 (32)  | Transcatheter aortic valve                | Long-term all-cause mortality                        | NR                                 | NOS                                | NOS 8.6; NR (1x)                                                                                                                                                                                                                                                                   |

|                     |                                                      |                                   |     |                                                             |                                                                                                                                                                                                                                                                                                          |
|---------------------|------------------------------------------------------|-----------------------------------|-----|-------------------------------------------------------------|----------------------------------------------------------------------------------------------------------------------------------------------------------------------------------------------------------------------------------------------------------------------------------------------------------|
| Hartling 2013 (50)  | Treating gestational diabetes mellitus               | High birth weight                 | Low | NOS                                                         | NOS: 8                                                                                                                                                                                                                                                                                                   |
| Hartling 2013 (50)  | Treating gestational diabetes mellitus               | Large-for-gestational age neonate | NR  | NOS                                                         | NOS: 8.3                                                                                                                                                                                                                                                                                                 |
| Hartling 2013 (50)  | Treating gestational diabetes mellitus               | Shoulder dystocia                 | Low | NOS                                                         | NOS: 8                                                                                                                                                                                                                                                                                                   |
| Henderson 2019 (51) | Treating asymptomatic bacteriuria                    | Pyelonephritis                    | NR  | USPSTF                                                      | Study quality rated as good, fair, or poor: fair quality (2/2)                                                                                                                                                                                                                                           |
| Higgins 2016 (25)   | Bacillus Calmette-Guérin                             | All-cause mortality               | NR  | ROBINS-I                                                    | Selection of participants into the study (0/8), confounding (0/8), classification of vaccination status (0/8), deviations from intended interventions (0/8), measurement of outcomes (8/8), missing outcome data (0/8), selection of the reported result (0/8)/ overall: low risk of bias (0/8)          |
| Higgins 2016 (25)   | Measles containing vaccines                          | All-cause mortality               | NR  | ROBINS-I                                                    | Selection of participants into the study (1/13), confounding (0/13), classification of vaccination status (0/13), deviations from intended interventions (0/13), measurement of outcomes (13/13), missing outcome data (0/13), selection of the reported result (0/13)/ overall: low risk of bias (0/13) |
| Hopley 2010 (33)    | Total hip arthroplasty                               | Reoperation                       | NR  | Special criteria for study topic according to Parker et al. | Average number of quality criteria from rating scale met: 5                                                                                                                                                                                                                                              |
| Hopley 2010 (33)    | Total hip arthroplasty                               | Dislocation                       | NR  | Special criteria for study topic according to Parker et al. | Average number of quality criteria from rating scale met: 5                                                                                                                                                                                                                                              |
| Hopley 2010 (33)    | Total hip arthroplasty                               | Deep infection                    | NR  | Special tool for study topic                                | Average number of quality criteria from rating scale met: 4.8                                                                                                                                                                                                                                            |
| Hüpfl 2010 (67)     | Chest-compression-only cardiopulmonary resuscitation | All-cause mortality               | NR  | NA                                                          | NR                                                                                                                                                                                                                                                                                                       |

|                     |                                    |                          |          |                      |                                                                                                                                                                                                                                                                                                                                                                                                                                                                                                                                                                                                                                                                                                                         |
|---------------------|------------------------------------|--------------------------|----------|----------------------|-------------------------------------------------------------------------------------------------------------------------------------------------------------------------------------------------------------------------------------------------------------------------------------------------------------------------------------------------------------------------------------------------------------------------------------------------------------------------------------------------------------------------------------------------------------------------------------------------------------------------------------------------------------------------------------------------------------------------|
| Jamal 2013 (82)     | Non-calcium-based phosphat binders | All-cause mortality      | NR       | NA                   | NR                                                                                                                                                                                                                                                                                                                                                                                                                                                                                                                                                                                                                                                                                                                      |
| Jefferson 2010 (46) | Parenteral influenza vaccine       | Influenza-like illness   | NR       | NOS, not convertible | Adequate allocation concealment (7/30)/ overall quality (assessed by Newcastle Ottawa scale, high quality defined as maximum 1 inadequate item): Quality A (8/26), rating appears in sensitivity analysis, only for cohort studies in nursing homes                                                                                                                                                                                                                                                                                                                                                                                                                                                                     |
| Jefferson 2010 (46) | Parenteral influenza vaccine       | Influenza                | NR       | NOS, not convertible | Adequate allocation concealment (3/10)                                                                                                                                                                                                                                                                                                                                                                                                                                                                                                                                                                                                                                                                                  |
| Jefferson 2012 (34) | Inactivated influenza vaccines     | Influenza                | NR       | NOS                  | Selection of exposed cohort (0/1), selection of non-exposed cohort (0/1), comparability (0/1), assessment of outcome summary assessments (0/1)                                                                                                                                                                                                                                                                                                                                                                                                                                                                                                                                                                          |
| Jefferson 2012 (34) | Inactivated influenza vaccines     | Influenza-like illness   | NR       | NOS                  | Selection of exposed cohort (0/2), selection of non-exposed cohort (0/2), comparability (0/2), assessment of outcome (1/2), summary assessments (0/2)                                                                                                                                                                                                                                                                                                                                                                                                                                                                                                                                                                   |
| Jin 2012 (83)       | Total flavonoids                   | Colorectal neoplasms     | NR       | NOS                  | Modified NOS: average 13 from maximum 16 points                                                                                                                                                                                                                                                                                                                                                                                                                                                                                                                                                                                                                                                                         |
| Johnston 2019 (23)  | Low red meat                       | All-cause mortality      | Very low | CLARITY, modified    | Number of studies with low risk of bias: 1. Was selection of exposed and non-exposed cohorts drawn from the same population? (22/30), 2. Can we be confident in the assessment of exposure? (4/30), 3. Can we be confident that the outcome of interest was not present at start of study? (30/30), 4. Did the study match exposed and unexposed for all variables that are associated with the outcome of interest or did the statistical analysis adjust for these prognostic variables? (20/30), 5. Can we be confident in the assessment of the presence or absence of prognostic factors? (22/30), 6. Can we be confident in the assessment of outcome? (28/30), 7. Was the follow-up of cohorts adequate? (13/30) |
| Johnston 2019 (23)  | Low red meat                       | Cardiovascular mortality | Very low | CLARITY, modified    | Number of studies with low risk of bias: 1. Was selection of exposed and non-exposed cohorts drawn from the same population? (21/28), 2. Can we be confident in the assessment of exposure? (5/28), 3. Can we be confident that the outcome of interest was not present at start of study? (24/28), 4. Did the study match exposed and unexposed for all variables that are associated with the outcome of interest or did the statistical analysis adjust for these prognostic variables? (3/28), 5. Can we be confident in the assessment of the presence or absence of prognostic factors? (24/28), 6. Can we be confident in the assessment of outcome? (26/28), 7. Was the follow-up of cohorts adequate? (12/28)  |

|                     |                                                 |                        |          |                                               |                                                                                                                                                                                                                                                                                                                                                                                                                                                                                                                                                                                                                                                                                                                      |
|---------------------|-------------------------------------------------|------------------------|----------|-----------------------------------------------|----------------------------------------------------------------------------------------------------------------------------------------------------------------------------------------------------------------------------------------------------------------------------------------------------------------------------------------------------------------------------------------------------------------------------------------------------------------------------------------------------------------------------------------------------------------------------------------------------------------------------------------------------------------------------------------------------------------------|
| Johnston 2019 (23)  | Low red meat                                    | Cardiovascular disease | Low      | CLARITY, modified                             | Number of studies with low risk of bias: 1. Was selection of exposed and non-exposed cohorts drawn from the same population? (15/16), 2. Can we be confident in the assessment of exposure? (5/16), 3. Can we be confident that the outcome of interest was not present at start of study? (5/16), 4. Did the study match exposed and unexposed for all variables that are associated with the outcome of interest or did the statistical analysis adjust for these prognostic variables? (3/16), 5. Can we be confident in the assessment of the presence or absence of prognostic factors? (14/16), 6. Can we be confident in the assessment of outcome? (14/16), 7. Was the follow-up of cohorts adequate? (4/16) |
| Kansagara 2013 (52) | Transfusion                                     | All-cause mortality    | NR       | Individual tool (based on NOS, AHRQ criteria) | Nonbiased selection? (11/11), high overall loss to follow-up or differential loss to follow-up? "No" for: (7/11), outcomes prespecified and defined? (11/11), ascertainment techniques adequately described? (9/11), nonbiased and adequate ascertainment methods? (7/11), propensity matching? (8/11), account for bleeding (6/11), account for timing of transfusion (3/11), adequate duration of follow-up? (verbal descriptions in systematic review)                                                                                                                                                                                                                                                            |
| Keag 2018 (84)      | Caesarean section                               | Urinary incontinence   | NR       | RoBANS/ SIGN                                  | Selection of participants (8/8), confounding variables (7/8), measurement of exposure (2/8), blinding of outcome assessments (0/8), incomplete outcome data (3/8), selective outcome reporting (8/8)/ overall quality: 0 (2/8)/ + (6/8)/ ++ (0/8)                                                                                                                                                                                                                                                                                                                                                                                                                                                                    |
| Keag 2018 (84)      | Caesarean section                               | Fecal incontinence     | NR       | RoBANS/ SIGN                                  | Selection of participants (5/5), confounding variables (3/5), measurement of exposure (1/5), blinding of outcome assessments (0/5), incomplete outcome data (3/5), selective outcome reporting (5/5)/ overall quality: 0 (1/5)/ + (4/5)/ ++ (0/5)                                                                                                                                                                                                                                                                                                                                                                                                                                                                    |
| Kredo 2014 (85)     | Starting and maintaining antiretroviral therapy | All-cause mortality    | Low      | NOS, modified                                 | Baseline CD4 count (1/2), other baseline variables (0/2), co-interventions (0/2), data collection (0/2), patient selection bias (2/2)                                                                                                                                                                                                                                                                                                                                                                                                                                                                                                                                                                                |
| Kredo 2014 (85)     | Starting and maintaining antiretroviral therapy | Attrition              | Very low | NOS, modified                                 | Baseline CD4 count (1/2), other baseline variables (0/2), co-interventions (0/2), data collection (0/2), patient selection bias (2/2)                                                                                                                                                                                                                                                                                                                                                                                                                                                                                                                                                                                |
| Kredo 2014 (85)     | Maintaining antiretroviral therapy              | All-cause mortality    | Very low | NOS, modified                                 | Baseline CD4 count (1/1), other baseline variables (1/1), co-interventions (1/1), data collection (0/1), patient selection bias (1/1)                                                                                                                                                                                                                                                                                                                                                                                                                                                                                                                                                                                |
| Li 2014 (54)        | Exenatide                                       | Acute pancreatitis     | NR       | NOS, modified with verbal rating              | NA                                                                                                                                                                                                                                                                                                                                                                                                                                                                                                                                                                                                                                                                                                                   |
| Li 2016 (53)        | DDP-4 inhibitors                                | Heart failure          | Very low | NOS, modified with verbal rating              | NA                                                                                                                                                                                                                                                                                                                                                                                                                                                                                                                                                                                                                                                                                                                   |

|                      |                                      |                                      |                                    |                                               |                                                                                                                                                                                                                                                                                                                                                                                                                                       |
|----------------------|--------------------------------------|--------------------------------------|------------------------------------|-----------------------------------------------|---------------------------------------------------------------------------------------------------------------------------------------------------------------------------------------------------------------------------------------------------------------------------------------------------------------------------------------------------------------------------------------------------------------------------------------|
| Li 2016 (53)         | DDP-4 inhibitors                     | Hospital admission for heart failure | Very low                           | NOS, modified with verbal rating              | NA                                                                                                                                                                                                                                                                                                                                                                                                                                    |
| Matthews 2018 (86)   | Tamoxifen                            | Heart failure                        | NR                                 | Cochrane tool, modified                       | Exposure definition (0/2), outcome/case definition (2/2), control selection (not applicable), confounding (2/2), missing Data (1/2), censoring (2/2)                                                                                                                                                                                                                                                                                  |
| Menne 2019 (87)      | SGLT-2 inhibitors                    | Acute kidney injury                  | NR                                 | NA                                            | NR                                                                                                                                                                                                                                                                                                                                                                                                                                    |
| Mesgarpour 2017 (88) | Erythropoiesis stimulating agents    | Venous thromboembolism               | Very low (RCTs and cohort studies) | NOS (number of studies with low risk of bias) | Representativeness of the exposed cohort? (5/5), selection of the non-exposed cohort? (5/5), ascertainment of exposure? (3/5), demonstration that the outcome of interest was not present at start of study? (5/5), comparability of cohorts on the basis of the design or analysis? (1/5), assessment of outcome? (2/5), was the follow-up long enough for the outcomes to occur? (1/5), adequacy of follow-up of the cohorts? (5/5) |
| Mesgarpour 2017 (88) | Erythropoiesis stimulating agents    | All-cause mortality                  | Low (RCTs and cohort studies)      | NOS (number of studies with low risk of bias) | Representativeness of the exposed cohort? (7/7), selection of the non-exposed cohort? (7/7), ascertainment of exposure? (5/7), demonstration that the outcome of interest was not present at start of study? (5/7), comparability of cohorts on the basis of the design or analysis? (4/7), assessment of outcome? (4/7), was the follow-up long enough for the outcomes to occur? (3/7), adequacy of follow-up of the cohorts? (7/7) |
| Moberley 2013 (89)   | Pneumococcal polysaccharide vaccines | Invasive pneumococcal disease        | NR                                 | Cochrane tool, modified                       | Random sequence generation (0/2), selection of participants (2/2), confounding (2/2), performance bias (0/2), detection bias (2/2), incomplete outcome data (0/2), selective reporting (2/2)                                                                                                                                                                                                                                          |
| Molnar 2015 (35)     | Neoral (Cyclosporin)                 | Acute rejection of kidney transplant | NR                                 | Tool by Wells et al. 2013                     | Number of studies with answer "yes" in brackets: comparison of intervention between two groups (2/2), intervention groups formed by time (2/2), retrospective design (2/2), confounding considered in study design or analysis (2/2), study protocol (1/2), outcome of acute rejection: prespecified, measured and analyzed (2/2)                                                                                                     |
| Navarese 2013 (90)   | Early intervention for NSTEMI-ACS    | All-cause mortality                  | NR                                 | NOS                                           | NOS: 8.3                                                                                                                                                                                                                                                                                                                                                                                                                              |
| Navarese 2013 (90)   | Early intervention for NSTEMI-ACS    | Myocardial infarction                | NR                                 | NOS                                           | NOS: 8.7                                                                                                                                                                                                                                                                                                                                                                                                                              |

|                         |                                                        |                           |                                   |                                                                                                  |                                                                                                                                                                                                                                                                             |
|-------------------------|--------------------------------------------------------|---------------------------|-----------------------------------|--------------------------------------------------------------------------------------------------|-----------------------------------------------------------------------------------------------------------------------------------------------------------------------------------------------------------------------------------------------------------------------------|
| Navarese 2013 (90)      | Early intervention for NSTEMI-ACS                      | Major bleeding            | NR                                | NOS                                                                                              | NOS: 8.3                                                                                                                                                                                                                                                                    |
| Nelson 2010 (36)        | Caesarean section                                      | Anal incontinence, feces  | NR                                | NA                                                                                               | No presentation of risk of bias assessment; the risk of incomplete outcome data is only presented for part of the studies                                                                                                                                                   |
| Nelson 2010 (36)        | Caesarean section                                      | Anal incontinence, flatus | NR                                | NA                                                                                               | No presentation of risk of bias assessment; the risk of incomplete outcome data is only presented for part of the studies                                                                                                                                                   |
| Nieuwenhuijse 2014 (37) | Ceramic-on-ceramic bearings for total hip arthroplasty | Harris Hip Score          | NR                                | Modified tool based on STROBE (studies rated as low to high quality); partly with verbal ratings | High quality (0/3)                                                                                                                                                                                                                                                          |
| Nieuwenhuijse 2014 (37) | High-flexion total knee arthroplasty                   | Flexion                   | NR                                | Modified tool based on STROBE (studies rated as low to high quality); partly with verbal ratings | High quality (0/26)                                                                                                                                                                                                                                                         |
| Nieuwenhuijse 2014 (37) | Gender-specific total knee arthroplasty                | Flexion-extension range   | NR                                | Modified tool based on STROBE (studies rated as low to high quality); partly with verbal ratings | High quality (0/2)                                                                                                                                                                                                                                                          |
| Nikooie 2019 (55)       | Second generation antipsychotics                       | Sedation                  | Moderate (probably for RCTs only) | ROBINS-I                                                                                         | Confounding (0/3), selection of participants into study (0/3), classification of interventions (0/3), deviations from intended interventions (0/3), missing data (0/3), measurement of outcomes (0/3), selection of reported results (0/3)/ overall: low risk of bias (0/3) |
| Nikooie 2019 (55)       | Second generation antipsychotics                       | Neurologic outcomes       | NR                                | ROBINS-I                                                                                         | Confounding (0/5), selection of participants into study (1/5), classification of interventions (0/5), deviations from intended interventions (0/5), missing data (1/5), measurement of outcomes (0/5), selection of reported results (1/5)/ overall: low risk of bias (0/5) |
| Ochen 2019 (91)         | Surgery for achilles tendon rupture                    | Re-rupture                | NR                                | MINORS                                                                                           | MINORS score: 11.3                                                                                                                                                                                                                                                          |
| Ochen 2019 (91)         | Surgery for achilles tendon rupture                    | Complications             | NR                                | MINORS                                                                                           | MINORS score: 11                                                                                                                                                                                                                                                            |

|                     |                          |                                              |    |                 |                                                                                                                                                                                                                                                                                                                                                                                                                                      |
|---------------------|--------------------------|----------------------------------------------|----|-----------------|--------------------------------------------------------------------------------------------------------------------------------------------------------------------------------------------------------------------------------------------------------------------------------------------------------------------------------------------------------------------------------------------------------------------------------------|
| Pittas 2010 (60)    | Vitamin D                | Hypertension                                 | NR | AHRQ/ STROBE    | Fair quality (3/3)                                                                                                                                                                                                                                                                                                                                                                                                                   |
| Raman 2013 (38)     | Carotid endarterectomy   | Ipsilateral stroke                           | NR | AHRQ            | Were eligibility criteria clear? (2/2), was selection bias unlikely? (0/2), were interventions adequately described? (0/2), were the outcomes fully defined? (1/2), no baseline imbalance between groups? (1/2), appropriate statistical analysis? (1/2), were potential confounders properly accounted for? (0/2), low risk of bias (0/2), funding source clear and not industry related? (1/2)/ overall: quality C (2/2)           |
| Raman 2013 (38)     | Carotid endarterectomy   | Stroke                                       | NR | AHRQ            | Were eligibility criteria clear? (3/3), was selection bias unlikely? (0/3), were interventions adequately described? (0/3), were the outcomes fully defined? (1/3), no baseline imbalance between groups? (1/3), appropriate statistical analysis? (1/3), were potential confounders properly accounted for? (0/3), low risk of bias (0/3), funding source clear and not industry related? (2/3)/ overall: quality C (3/3)           |
| Raman 2013 (38)     | Carotid artery stenting  | Periprocedural stroke                        | NR | AHRQ            | Were eligibility criteria clear? (5/5), was selection bias unlikely? (5/5), were interventions adequately described? (1/5), were the outcomes fully defined? (5/5), no baseline imbalance between groups (1/5), appropriate statistical analysis (4/5), if multicenter, was this accounted for in analysis? (0, or NA/5), were potential confounders properly accounted for? (0/5), low risk of bias (0/5)/ overall: quality C (5/5) |
| Schweizer 2013 (39) | Nasal deconolization     | Surgical site infection                      | NR | Downs and Black | Mean ratings: reporting (6.5/of max. 11), external validity (3/of max. 3), internal validity (2/of max. 7), internal validity confounding (1/of max.6), number of studies sufficiently powered (4/6)                                                                                                                                                                                                                                 |
| Schweizer 2013 (39) | Glycopeptide prophylaxis | Surgical site infection                      | NR | Downs and Black | Mean ratings: reporting (8.4/of max. 11), external validity (3/of max. 3), internal validity (3/of max. 7), internal validity confounding (1.7/of max.6), number of studies sufficiently powered (2/7)                                                                                                                                                                                                                               |
| Silvain 2012 (40)   | Enoxaparin               | All-cause mortality                          | NR | NOS             | NOS 7.9                                                                                                                                                                                                                                                                                                                                                                                                                              |
| Silvain 2012 (40)   | Enoxaparin               | Major bleeding                               | NR | NOS             | NOS 8.1                                                                                                                                                                                                                                                                                                                                                                                                                              |
| Silvain 2012 (40)   | Enoxaparin               | All-cause mortality or myocardial infarction | NR | NOS             | NOS:7.7                                                                                                                                                                                                                                                                                                                                                                                                                              |



|                           |                                 |                                        |                                |                                       |                                                                                                                                                                                                                                                                                                                                                        |
|---------------------------|---------------------------------|----------------------------------------|--------------------------------|---------------------------------------|--------------------------------------------------------------------------------------------------------------------------------------------------------------------------------------------------------------------------------------------------------------------------------------------------------------------------------------------------------|
| Suthar 2012 (26)          | Antiretroviral therapy          | Tuberculosis infection                 | NR                             | NOS, modified                         | Modified NOS; average 53.2% of the maximum score                                                                                                                                                                                                                                                                                                       |
| Te Morenga 2013 (61)      | Sugar                           | Weight gain                            | NR                             | NA                                    | NR                                                                                                                                                                                                                                                                                                                                                     |
| Te Morenga 2013 (61)      | Sugar                           | Body Mass Index                        | NR                             | NA                                    | NR                                                                                                                                                                                                                                                                                                                                                     |
| Thomas 2010 (92)          | Influenza vaccines              | Influenza-like illness                 | NR                             | NOS with verbal rating, Cochrane tool | NOS NA/ Cochrane: adequate sequence generation (0/1), allocation concealment (0/1), blinding (0/1), incomplete outcome data addressed (0/1), free of selective reporting (1/1), free of other bias (0/1)                                                                                                                                               |
| Tickell-Painter 2017 (93) | Mefloquine                      | Discontinuation due to adverse effects | High (RCTs and cohort studies) | ROBINS-I                              | Confounding (0/9), selection of participants (0/9), measurement of interventions (5/9), departures from intended interventions (2/9), missing data (8/9), measurement of outcomes (0/9), selection of the reported results (4/9), other (5/9)                                                                                                          |
| Tickell-Painter 2017 (93) | Mefloquine                      | Serious adverse events or effects      | NR                             | ROBINS-I                              | Confounding (0/2), selection of participants (1/2), measurement of interventions (2/2), departures from intended interventions (0/2), missing data (1/2), measurement of outcomes (0/2), selection of the reported results (1/2), other (0/2)                                                                                                          |
| Tickell-Painter 2017 (93) | Mefloquine                      | Nausea                                 | NR                             | ROBINS-I                              | Confounding (1/3), selection of participants (1/3), measurement of interventions (2/3), departures from intended interventions (0/3), missing data (1/3), measurement of outcomes (0/3), selection of the reported results (1/3), other (0/3)                                                                                                          |
| Tricco 2018 (45)          | Live-attenuated zoster vaccines | Suspected Herpes Zoster                | NR                             | NOS, not convertible                  | Representativeness of the exposed cohort (1/3), selection of the non-exposed cohort (3/3), ascertainment of exposure (3/3), demonstration that outcome of interest was not present at start of study (3/3), comparability of cohorts on the basis of the design or analysis (0/3), assessment of outcome (3/3), adequacy of follow up of cohorts (3/3) |
| Vinceti 2018 (59)         | Selenium                        | Cancer                                 | Very low                       | NOS                                   | NOS: 8                                                                                                                                                                                                                                                                                                                                                 |
| Vinceti 2018 (59)         | Selenium                        | Cancer mortality                       | Very low                       | NOS                                   | NOS: 8.5; NR for (5/7)                                                                                                                                                                                                                                                                                                                                 |

|                   |                                                    |                         |                                    |                                                  |                                                                |
|-------------------|----------------------------------------------------|-------------------------|------------------------------------|--------------------------------------------------|----------------------------------------------------------------|
| Vinceti 2018 (59) | Selenium                                           | Colorectal cancer       | Very low                           | NOS                                              | NOS: 8.5                                                       |
| Wilson 2011 (41)  | Traditional birth attendants                       | Perinatal mortality     | NR                                 | NOS, modified, not convertible                   | NA                                                             |
| Wilson 2011 (41)  | Traditional birth attendants                       | Neonatal mortality      | NR                                 | NOS, modified, not convertible                   | NA                                                             |
| Wilson 2019 (42)  | Unicompartmental knee arthroplasty                 | Venous thromboembolism  | NR                                 | NOS, modified, not convertible                   | NA                                                             |
| Wilson 2019 (42)  | Unicompartmental knee arthroplasty                 | Flexion-extension range | NR                                 | NOS, modified, not convertible                   | NA                                                             |
| Wilson 2019 (42)  | Unicompartmental knee arthroplasty                 | Operation duration      | NR                                 | NOS, modified, not convertible                   | NA                                                             |
| Yank 2011 (44)    | Recombinant factor VII                             | All-cause mortality     | Low (RCTs and cohort studies)      | AHRQ/ based on various tools (STROBE and others) | Study quality rated as good, fair, or poor: good quality (2/2) |
| Yank 2011 (44)    | Recombinant factor VII                             | Thromboembolism         | Moderate (RCTs and cohort studies) | AHRQ/ based on various tools (STROBE and others) | Study quality rated as good, fair, or poor: good quality (2/2) |
| Zhang 2016 (94)   | Everolimus-eluting bioresorbable vascular scaffold | Stent thrombosis        | NR                                 | NOS                                              | NOS: 8                                                         |
| Zhang 2016 (94)   | Everolimus-eluting bioresorbable vascular scaffold | All-cause mortality     | NR                                 | NOS                                              | NOS: 7.5                                                       |

|                 |                                                    |                                  |    |        |                                                                                                                                                                                  |
|-----------------|----------------------------------------------------|----------------------------------|----|--------|----------------------------------------------------------------------------------------------------------------------------------------------------------------------------------|
| Zhang 2016 (94) | Everolimus-eluting bioresorbable vascular scaffold | Coronary heart disease mortality | NR | NOS    | NOS: 8                                                                                                                                                                           |
| Zhang 2017 (95) | Percutaneous coronary intervention                 | All-cause mortality              | NR | NOS    | NOS: 8.4                                                                                                                                                                         |
| Zhang 2017 (95) | Percutaneous coronary intervention                 | Cardiovascular mortality         | NR | NOS    | NOS: 8.2                                                                                                                                                                         |
| Zhang 2017 (95) | Percutaneous coronary intervention                 | Myocardial infarction            | NR | NOS    | NOS: 8.4                                                                                                                                                                         |
| Ziff 2015 (96)  | Digoxin                                            | All-cause mortality              | NR | RoBANS | Selection of participants (1/8), confounding variables (1/8), measurement of exposure (1/8), blinding of outcome (1/8), incomplete outcome data (1/8), selective reporting (2/8) |
| Ziff 2015 (96)  | Digoxin                                            | Cardiovascular mortality         | NR | RoBANS | Selection of participants (0/3), confounding variables (0/3), measurement of exposure (0/3), blinding of outcome (0/3), incomplete outcome data (0/3), selective reporting (0/3) |
| Ziff 2015 (96)  | Digoxin                                            | Hospital admission               | NR | RoBANS | Selection of participants (0/4), confounding variables (2/4), measurement of exposure (3/4), blinding of outcome (2/4), incomplete outcome data (2/4), selective reporting (2/4) |

\*rated with GRADE/ AHRQ criteria; AHRQ= agency for healthcare research and quality; CLARITY= clinical advances through research and information translation; CONSORT= consolidated standards of reporting trials; DDP-4= dipeptidyl peptidase 4; DHA= docosahexaenoic acid; EPA= eicosapentaenoic acid; GRADE= grades of recommendation, assessment, development, and evaluation; MINORS= methodological index for non-randomized studies; MOOSE= meta-analyses of observational studies in epidemiology; NA= not applicable; NOS= newcastle-ottawa scale; NR= not reported; NSTEMI= non-ST elevation acute coronary syndrome; QUATSO= quality assessment tool for systematic reviews of observational studies; RoB= risk of bias; RoBANS= risk of bias assessment tool for non-randomized studies; ROBINS: risk of bias in non-randomized studies of interventions; SIGN= scottish intercollegiate guidelines network; SGLT-2= sodium glucose transporter 2; STROBE= strengthening the reporting of observational studies in epidemiology; UPSTF= united states preventive services task force.





















| Systematic review | Cochrane | JADAD | CONSORT, AHRQ | USPSTF, AHRQ | AHRQ | SIGN | MINORS | Individual tools | None | NOS | (Modified) Cochrane tool | STROBE, AHRQ | ROBINS-1 | USPSTF, AHRQ | AHRQ | CLARITY | RoBANS | RoBANS, SIGN | MINORS | Downs and Black | Wells et al., 2013 | Individual tools | None |  |
|-------------------|----------|-------|---------------|--------------|------|------|--------|------------------|------|-----|--------------------------|--------------|----------|--------------|------|---------|--------|--------------|--------|-----------------|--------------------|------------------|------|--|
| Zhang 2016 (94)   |          |       |               |              |      |      |        |                  |      |     |                          |              |          |              |      |         |        |              |        |                 |                    |                  |      |  |
| Zhang 2016 (94)   |          |       |               |              |      |      |        |                  |      |     |                          |              |          |              |      |         |        |              |        |                 |                    |                  |      |  |
| Zhang 2016 (94)   |          |       |               |              |      |      |        |                  |      |     |                          |              |          |              |      |         |        |              |        |                 |                    |                  |      |  |
| Zhang 2017 (95)   |          |       |               |              |      |      |        |                  |      |     |                          |              |          |              |      |         |        |              |        |                 |                    |                  |      |  |
| Zhang 2017 (95)   |          |       |               |              |      |      |        |                  |      |     |                          |              |          |              |      |         |        |              |        |                 |                    |                  |      |  |
| Zhang 2017 (95)   |          |       |               |              |      |      |        |                  |      |     |                          |              |          |              |      |         |        |              |        |                 |                    |                  |      |  |
| Ziff 2015 (96)    |          |       |               |              |      |      |        |                  |      |     |                          |              |          |              |      |         |        |              |        |                 |                    |                  |      |  |
| Ziff 2015 (96)    |          |       |               |              |      |      |        |                  |      |     |                          |              |          |              |      |         |        |              |        |                 |                    |                  |      |  |
| Ziff 2015 (96)    |          |       |               |              |      |      |        |                  |      |     |                          |              |          |              |      |         |        |              |        |                 |                    |                  |      |  |

AHRQ= agency for healthcare research and quality; CLARITY= clinical advances through research and information translation; CONSORT= consolidated standards of reporting trials; MINORS= methodological index for non-randomized studies; MOOSE= meta-analyses of observational studies in epidemiology; NOS= newcastle-ottawa scale; RoBANS= risk of bias assessment tool for non-randomized studies; ROBINS: risk of bias in non-randomized studies of interventions; SIGN= scottish intercollegiate guidelines network; STROBE= strengthening the reporting of observational studies in epidemiology; USPSTF= united states preventive services task force.

**Table S9. Ratings of PI/ECO\*-similarity degree for included body of evidence-pairs // \*PI/ECO= population, intervention/ exposure, comparator, outcome**

| Reference/<br>year                | Intervention/Exposure                          | Outcome                                 | Population | Intervention/<br>exposure | Comparator | Outcome | Overall |
|-----------------------------------|------------------------------------------------|-----------------------------------------|------------|---------------------------|------------|---------|---------|
| Abou-Setta<br>2011 (74)           | Nerve block                                    | Delirium                                | 2          | 2                         | 2          | 1       | 2       |
| Abou-Setta<br>2011 (74)           | Spinal anesthesia                              | Mortality                               | 2          | 1                         | 1          | 1       | 2       |
| Aburto 2013<br>(75)               | Low sodium                                     | Mortality                               | 2          | 2                         | 2          | 1       | 2       |
| Aburto 2013<br>(75)               | Low sodium                                     | Cardiovascular disease                  | 2          | 2                         | 2          | 2       | 2       |
| Ahmad 2015<br>(27)                | Intra-aortic balloon pump                      | Mortality                               | 1          | 1                         | 1          | 1       | 1       |
| Alexander<br>2017 (76)            | Docosahexaenoic acid and eicosapentaenoic acid | Any coronary heart disease event        | 2          | 2                         | 2          | 1       | 2       |
| Alexander<br>2017 (76)            | Docosahexaenoic acid and eicosapentaenoic acid | Fatal coronary heart disease events     | 2          | 2                         | 2          | 1       | 2       |
| Alexander<br>2017 (76)            | Docosahexaenoic acid and eicosapentaenoic acid | Non-fatal coronary heart disease events | 2          | 2                         | 2          | 1       | 2       |
| Alipanah<br>2018 (24)             | Self-administered therapy                      | Low treatment success                   | 3          | 2                         | 1          | 1       | 3       |
| Alipanah<br>2018 (24)             | Self-administered therapy                      | Low treatment completion                | 3          | 2                         | 1          | 1       | 3       |
| Alipanah<br>2018 (24)             | Self-administered therapy                      | Mortality                               | 3          | 2                         | 1          | 1       | 3       |
| Anglemyer<br>2013 (77)            | Antiretroviral therapy                         | HIV infection                           | 2          | 2                         | 3          | 1       | 3       |
| Azad 2017<br>(21)                 | Nonnutritive sweeteners                        | BMI                                     | 2          | 2                         | 1          | 1       | 2       |
| Barnard 2015<br>(28)              | Surgical abortion by mid-level providers       | Failure or incomplete abortion          | 2          | 2                         | 1          | 1       | 2       |
| Barnard 2015<br>(28)              | Surgical abortion by mid-level providers       | Complications                           | 2          | 2                         | 1          | 1       | 2       |
| Barnard 2015<br>(28)              | Surgical abortion by mid-level providers       | Abortion failure and complications      | 2          | 2                         | 1          | 1       | 2       |
| Bellemain-<br>Appaix 2012<br>(48) | Clopidogrel                                    | Mortality                               | 2          | 2                         | 2          | 1       | 2       |
| Bellemain-<br>Appaix 2012<br>(48) | Clopidogrel                                    | Major bleeding                          | 2          | 2                         | 2          | 1       | 2       |
| Bellemain-<br>Appaix 2012<br>(48) | Clopidogrel                                    | Major coronary event                    | 2          | 2                         | 2          | 1       | 2       |
| Bellemain-<br>Appaix 2014<br>(47) | P2Y12 Inhibitors                               | Mortality                               | 2          | 2                         | 2          | 1       | 2       |
| Bellemain-<br>Appaix 2014<br>(47) | P2Y12 Inhibitors                               | Major bleeding                          | 2          | 2                         | 2          | 1       | 2       |

|                            |                                           |                                                      |   |   |   |   |   |
|----------------------------|-------------------------------------------|------------------------------------------------------|---|---|---|---|---|
| Bellemain-Appaix 2014 (47) | P2Y12 Inhibitors                          | Main composite ischemic endpoint                     | 2 | 2 | 2 | 1 | 2 |
| Bloomfield 2016 (22)       | Mediterranean diet                        | Breast cancer                                        | 2 | 2 | 2 | 1 | 2 |
| Bolland 2015 (49)          | Calcium supplements                       | All fractures                                        | 1 | 2 | 1 | 1 | 2 |
| Bolland 2015 (49)          | Calcium supplements                       | Vertebral fracture                                   | 1 | 2 | 1 | 1 | 2 |
| Bolland 2015 (49)          | Calcium supplements                       | Hip fracture                                         | 1 | 2 | 1 | 1 | 2 |
| Brenner 2014 (29)          | Sigmoidoscopy, screening for CRC          | Colorectal cancer mortality                          | 1 | 1 | 1 | 1 | 1 |
| Brenner 2014 (29)          | Sigmoidoscopy, screening for CRC          | Colorectal cancer incidence                          | 1 | 1 | 1 | 2 | 2 |
| Chowdhury 2012 (78)        | Omega-3-fatty acids                       | Cerebrovascular disease                              | 2 | 2 | 1 | 1 | 2 |
| Chowdhury 2014a (79)       | $\alpha$ -linolenic acid                  | Coronary event                                       | 3 | 2 | 2 | 1 | 3 |
| Chowdhury 2014a (79)       | Omega-3-fatty acids                       | Coronary event                                       | 3 | 2 | 2 | 1 | 3 |
| Chowdhury 2014a (79)       | Omega-6-fatty acids                       | Coronary event                                       | 3 | 2 | 2 | 1 | 3 |
| Chowdhury 2014b (80)       | Vitamin D                                 | Mortality                                            | 2 | 3 | 3 | 1 | 3 |
| Chung 2011 (58)            | Vitamin D                                 | Colorectal cancer                                    | 2 | 3 | 3 | 1 | 3 |
| Chung 2011 (58)            | Vitamin D                                 | Breast cancer                                        | 2 | 3 | 3 | 1 | 3 |
| Chung 2016 (56)            | Calcium                                   | Cardiovascular mortality                             | 2 | 2 | 1 | 1 | 2 |
| Ding 2017 (81)             | Dairy                                     | Systolic blood pressure                              | 2 | 1 | 1 | 1 | 2 |
| Fenton 2018 (30)           | Radiation therapy                         | Erectile dysfunction                                 | 1 | 1 | 2 | 1 | 2 |
| Fenton 2018 (30)           | Radical Prostatectomy                     | Urinary incontinence                                 | 1 | 1 | 2 | 1 | 2 |
| Fenton 2018 (30)           | Radical Prostatectomy                     | Erectile dysfunction                                 | 1 | 1 | 2 | 1 | 2 |
| Filippini 2017 (43)        | Disease-modifying drugs                   | Conversion to clinically definite multiple sclerosis | 1 | 2 | 1 | 1 | 2 |
| Fluri 2010 (31)            | Extracranial-intracranial arterial bypass | Mortality                                            | 2 | 1 | 2 | 1 | 2 |
| Fluri 2010 (31)            | Extracranial-intracranial arterial bypass | Any stroke                                           | 2 | 1 | 2 | 1 | 2 |
| Fluri 2010 (31)            | Extracranial-intracranial arterial bypass | Death or dependency                                  | 1 | 1 | 2 | 1 | 2 |
| Gargiulo 2016 (32)         | Transcatheter aortic valve                | Early mortality                                      | 2 | 2 | 1 | 1 | 2 |
| Gargiulo 2016 (32)         | Transcatheter aortic valve                | Mid-term mortality                                   | 2 | 2 | 1 | 1 | 2 |
| Gargiulo 2016 (32)         | Transcatheter aortic valve                | Long-term mortality                                  | 2 | 1 | 1 | 1 | 2 |

|                     |                                                                                    |                                                      |   |   |   |   |   |
|---------------------|------------------------------------------------------------------------------------|------------------------------------------------------|---|---|---|---|---|
| Hartling 2013 (50)  | Treating gestational diabetes mellitus                                             | Birth weight > 4000g                                 | 2 | 1 | 1 | 1 | 2 |
| Hartling 2013 (50)  | Treating gestational diabetes mellitus                                             | Large-for-gestational age neonate                    | 2 | 1 | 1 | 1 | 2 |
| Hartling 2013 (50)  | Treating gestational diabetes mellitus                                             | Shoulder dystocia                                    | 2 | 1 | 1 | 1 | 2 |
| Henderson 2019 (51) | Treating asymptomatic bacteriuria                                                  | Pyelonephritis                                       | 2 | 2 | 3 | 1 | 3 |
| Higgins 2016 (25)   | Bacillus Calmette-Guérin                                                           | Mortality                                            | 3 | 1 | 2 | 1 | 3 |
| Higgins 2016 (25)   | Measles containing vaccines                                                        | Mortality                                            | 3 | 2 | 2 | 1 | 3 |
| Hopley 2010 (33)    | Total hip arthroplasty                                                             | Reoperation                                          | 2 | 1 | 1 | 1 | 2 |
| Hopley 2010 (33)    | Total hip arthroplasty                                                             | Dislocation                                          | 2 | 1 | 1 | 1 | 2 |
| Hopley 2010 (33)    | Total hip arthroplasty                                                             | Deep infection                                       | 2 | 2 | 1 | 1 | 2 |
| Hüpf 2010 (67)      | Chest-compression-only cardiopulmonary resuscitation                               | All-cause mortality                                  | 1 | 3 | 3 | 1 | 3 |
| Jamal 2013 (82)     | Non-calcium-based phosphat binders                                                 | Mortality                                            | 2 | 2 | 1 | 1 | 2 |
| Jefferson 2010 (46) | Parenteral influenza vaccine                                                       | Influenza-like illness                               | 2 | 2 | 3 | 1 | 3 |
| Jefferson 2010 (46) | Parenteral influenza vaccine                                                       | Influenza                                            | 2 | 2 | 1 | 1 | 2 |
| Jefferson 2012 (34) | Inactivated influenza vaccines                                                     | Influenza                                            | 1 | 2 | 1 | 1 | 2 |
| Jefferson 2012 (34) | Inactivated influenza vaccines                                                     | Influenza-like illness                               | 1 | 2 | 1 | 1 | 2 |
| Jin 2012 (83)       | Total flavonoids                                                                   | Colorectal neoplasms                                 | 3 | 2 | 2 | 3 | 3 |
| Johnston 2019 (23)  | Low red meat                                                                       | Mortality                                            | 2 | 2 | 2 | 1 | 2 |
| Johnston 2019 (23)  | Low red meat                                                                       | Cardiovascular mortality                             | 2 | 2 | 2 | 1 | 2 |
| Johnston 2019 (23)  | Low red meat                                                                       | Cardiovascular disease                               | 2 | 2 | 2 | 1 | 2 |
| Kansagara 2013 (52) | Transfusion                                                                        | Mortality                                            | 2 | 3 | 3 | 2 | 3 |
| Keag 2018 (84)      | Caesarean section                                                                  | Urinary incontinence                                 | 3 | 2 | 2 | 1 | 3 |
| Keag 2018 (84)      | Caesarean section                                                                  | Fecal incontinence                                   | 3 | 2 | 2 | 1 | 3 |
| Kredo 2014 (85)     | Nurse or clinical officer for initiation and maintenance of antiretroviral therapy | Mortality                                            | 2 | 3 | 1 | 1 | 3 |
| Kredo 2014 (85)     | Nurse or clinical officer for initiation and maintenance of antiretroviral therapy | Lost to follow-up                                    | 2 | 3 | 1 | 1 | 3 |
| Kredo 2014 (85)     | Nurse or clinical officer for maintenance of antiretroviral therapy                | Mortality                                            | 2 | 3 | 2 | 1 | 3 |
| Li 2014 (54)        | Exenatide                                                                          | Acute pancreatitis/ Admission for acute pancreatitis | 2 | 1 | 2 | 2 | 2 |
| Li 2016 (53)        | DDP-4 Inhibitors                                                                   | Heart failure                                        | 2 | 2 | 2 | 1 | 2 |



|                         |                                                        |                                      |   |   |   |   |   |
|-------------------------|--------------------------------------------------------|--------------------------------------|---|---|---|---|---|
| Li 2016 (53)            | DDP-4 Inhibitors                                       | Hospital admission for heart failure | 2 | 2 | 2 | 1 | 2 |
| Matthews 2018 (86)      | Tamoxifen                                              | Heart failure                        | 2 | 3 | 1 | 1 | 3 |
| Menne 2019 (87)         | SGLT-2 inhibitors                                      | Acute kidney injury                  | 2 | 2 | 2 | 1 | 2 |
| Mesgarpour 2017 (88)    | Erythropoiesis stimulating agents                      | Venous thromboembolism               | 2 | 2 | 2 | 1 | 2 |
| Mesgarpour 2017 (88)    | Erythropoiesis stimulating agents                      | Mortality                            | 2 | 2 | 2 | 1 | 2 |
| Moberley 2013 (89)      | Pneumococcal polysaccharide vaccines                   | Invasive pneumococcal disease        | 2 | 2 | 1 | 1 | 2 |
| Molnar 2015 (35)        | Neoral (Cyclosporin)                                   | Acute rejection of kidney transplant | 2 | 1 | 2 | 1 | 2 |
| Navarese 2013 (90)      | Early intervention for NSTEMI-ACS                      | Mortality                            | 2 | 2 | 1 | 1 | 2 |
| Navarese 2013 (90)      | Early intervention for NSTEMI-ACS                      | Myocardial infarction                | 2 | 2 | 1 | 1 | 2 |
| Navarese 2013 (90)      | Early intervention for NSTEMI-ACS                      | Major bleeding                       | 2 | 2 | 1 | 1 | 2 |
| Nelson 2010 (36)        | Caesarean section                                      | Anal incontinence, feces             | 3 | 2 | 2 | 1 | 3 |
| Nelson 2010 (36)        | Caesarean section                                      | Anal incontinence, flatus            | 3 | 2 | 2 | 1 | 3 |
| Nieuwenhuijse 2014 (37) | Ceramic-on-ceramic bearings for total hip arthroplasty | Harris Hip Score                     | 2 | 1 | 1 | 1 | 2 |
| Nieuwenhuijse 2014 (37) | High-flexion total knee arthroplasty                   | Flexion (degrees)                    | 2 | 1 | 1 | 1 | 2 |
| Nieuwenhuijse 2014 (37) | Gender-specific total knee arthroplasty                | Flexion-extension range (degrees)    | 2 | 1 | 1 | 1 | 2 |
| Nikooie 2019 (55)       | Second generation antipsychotics                       | Sedation                             | 2 | 2 | 1 | 2 | 2 |
| Nikooie 2019 (55)       | Second generation antipsychotics                       | Neurologic outcomes                  | 2 | 2 | 1 | 2 | 2 |
| Ochen 2019 (91)         | Surgery for achilles tendon rupture                    | Re-rupture                           | 1 | 2 | 2 | 1 | 2 |
| Ochen 2019 (91)         | Surgery for achilles tendon rupture                    | Complications                        | 1 | 2 | 2 | 1 | 2 |
| Pittas 2010 (60)        | Vitamin D                                              | Hypertension                         | 2 | 3 | 3 | 1 | 3 |
| Raman 2013 (38)         | Carotid endarterectomy                                 | Ipsilateral stroke                   | 2 | 1 | 2 | 1 | 2 |
| Raman 2013 (38)         | Carotid endarterectomy                                 | Any stroke                           | 2 | 1 | 2 | 1 | 2 |
| Raman 2013 (38)         | Carotid artery stenting                                | Periprocedural stroke                | 2 | 2 | 2 | 1 | 2 |
| Schweizer 2013 (39)     | Nasal deconolization                                   | Surgical site infection              | 2 | 2 | 1 | 1 | 2 |
| Schweizer 2013 (39)     | Glycopeptide prophylaxis                               | Surgical site infection              | 2 | 2 | 2 | 1 | 2 |
| Silvain 2012 (40)       | Enoxaparin                                             | Mortality                            | 2 | 1 | 2 | 1 | 2 |
| Silvain 2012 (40)       | Enoxaparin                                             | Major bleeding                       | 2 | 1 | 2 | 1 | 2 |

|                           |                                                    |                                        |   |   |   |   |   |
|---------------------------|----------------------------------------------------|----------------------------------------|---|---|---|---|---|
| Silvain 2012 (40)         | Enoxaparin                                         | Death or Myocardial infarction         | 2 | 1 | 2 | 1 | 2 |
| Suthar 2012 (26)          | Antiretroviral therapy                             | Tuberculosis infection                 | 2 | 3 | 3 | 1 | 3 |
| Te Morenga 2013 (61)      | Sugar                                              | Weight gain (kg)                       | 2 | 1 | 2 | 1 | 2 |
| Te Morenga 2013 (61)      | Sugar                                              | BMI (kg/m <sup>2</sup> )               | 2 | 2 | 2 | 1 | 2 |
| Thomas 2010 (92)          | Influenza vaccines                                 | Influenza-like illness                 | 2 | 3 | 3 | 1 | 3 |
| Tickell-Painter 2017 (93) | Mefloquine                                         | Discontinuation due to adverse effects | 2 | 1 | 1 | 1 | 2 |
| Tickell-Painter 2017 (93) | Mefloquine                                         | Serious adverse events or effects      | 3 | 1 | 1 | 2 | 3 |
| Tickell-Painter 2017 (93) | Mefloquine                                         | Nausea                                 | 3 | 1 | 1 | 1 | 3 |
| Tricco 2018 (45)          | Live-attenuated zoster vaccines                    | Suspected Herpes Zoster                | 2 | 2 | 2 | 1 | 2 |
| Vinceti 2018 (59)         | Selenium                                           | Any cancer                             | 2 | 3 | 3 | 2 | 3 |
| Vinceti 2018 (59)         | Selenium                                           | Cancer mortality                       | 2 | 3 | 3 | 1 | 3 |
| Vinceti 2018 (59)         | Selenium                                           | Colorectal cancer                      | 2 | 3 | 3 | 1 | 3 |
| Wilson 2011 (41)          | Traditional birth attendants                       | Perinatal mortality                    | 1 | 2 | 3 | 1 | 3 |
| Wilson 2011 (41)          | Traditional birth attendants                       | Neonatal mortality                     | 1 | 2 | 3 | 1 | 3 |
| Wilson 2019 (42)          | Unicompartmental knee arthroplasty                 | Venous thromboembolism                 | 2 | 1 | 1 | 1 | 2 |
| Wilson 2019 (42)          | Unicompartmental knee arthroplasty                 | Range of movement (degrees)            | 2 | 1 | 1 | 1 | 2 |
| Wilson 2019 (42)          | Unicompartmental knee arthroplasty                 | Operation duration (minutes)           | 2 | 1 | 1 | 1 | 2 |
| Yank 2011 (44)            | Recombinant factor VII                             | Mortality                              | 2 | 2 | 1 | 1 | 2 |
| Yank 2011 (44)            | Recombinant factor VII                             | Thromboembolic events                  | 2 | 2 | 1 | 1 | 2 |
| Zhang 2016 (94)           | Everolimus-eluting bioresorbable vascular scaffold | Stent thrombosis                       | 2 | 1 | 1 | 1 | 2 |
| Zhang 2016 (94)           | Everolimus-eluting bioresorbable vascular scaffold | Mortality                              | 2 | 1 | 1 | 1 | 2 |
| Zhang 2016 (94)           | Everolimus-eluting bioresorbable vascular scaffold | Cardiac death                          | 2 | 1 | 1 | 1 | 2 |
| Zhang 2017 (95)           | Percutaneous coronary intervention                 | Mortality                              | 2 | 2 | 1 | 1 | 2 |
| Zhang 2017 (95)           | Percutaneous coronary intervention                 | Cardiovascular mortality               | 2 | 2 | 1 | 1 | 2 |
| Zhang 2017 (95)           | Percutaneous coronary intervention                 | Myocardial infarction                  | 2 | 2 | 1 | 1 | 2 |
| Ziff 2015 (96)            | Digoxin                                            | Mortality                              | 3 | 1 | 1 | 1 | 3 |
| Ziff 2015 (96)            | Digoxin                                            | Cardiovascular mortality               | 3 | 1 | 1 | 1 | 3 |

|                |         |                    |   |   |   |   |   |
|----------------|---------|--------------------|---|---|---|---|---|
| Ziff 2015 (96) | Digoxin | Hospital admission | 2 | 1 | 1 | 1 | 2 |
|----------------|---------|--------------------|---|---|---|---|---|

DDP-4= dipeptidyl peptidase 4; NSTE-ACS= non-ST elevation acute coronary syndrome; SGLT-2= sodium glucose transporter 2.

**Table S10. Effect estimates and statistical heterogeneity for meta-analyses of RCTs and cohort studies**

| Body of evidence-pair |                                          |                                  | Meta-analysis of RCTs |                                            |                    | Meta-analysis of cohort studies |                                            |                    |
|-----------------------|------------------------------------------|----------------------------------|-----------------------|--------------------------------------------|--------------------|---------------------------------|--------------------------------------------|--------------------|
| Systematic review     | Intervention/ Exposure                   | Outcome                          | Number of studies     | Summary measure; effect estimates (95% CI) | I <sup>2</sup> (%) | Number of studies               | Summary measure; effect estimates (95% CI) | I <sup>2</sup> (%) |
| Abou-Setta 2011 (74)  | Nerve block                              | Delirium                         | 4                     | OR: 0.33 (0.16, 0.66)                      | 0                  | 2                               | OR: 0.24 (0.08, 0.72)                      | 60                 |
| Abou-Setta 2011 (74)  | Spinal anesthesia                        | All-cause mortality              | 2                     | OR: 1.73 (0.53, 5.68)                      | 0                  | 5                               | OR: 0.87 (0.45, 1.67)                      | 61                 |
| Aburto 2013 (75)      | Low sodium                               | All-cause mortality              | 4                     | RR: 0.7 (0.44, 1.14)                       | 0                  | 7                               | RR: 0.94 (0.83, 1.06)                      | 61                 |
| Aburto 2013 (75)      | Low sodium                               | Cardiovascular disease           | 2                     | RR: 0.84 (0.57, 1.23)                      | 0                  | 9                               | RR: 0.89 (0.75, 1.08)                      | 78                 |
| Ahmad 2015 (27)       | Intra-aortic balloon pump                | All-cause mortality              | 12                    | OR: 0.96 (0.74, 1.24)                      | 0                  | 14                              | OR: 1.02 (0.57, 1.82)                      | 97                 |
| Alexander 2017 (76)   | DHA and EPA                              | Coronary heart disease           | 18                    | RR: 0.94 (0.85, 1.05)                      | 36                 | 17                              | RR: 0.82 (0.74, 0.92)                      | 66                 |
| Alexander 2017 (76)   | DHA and EPA                              | Coronary heart disease mortality | 14                    | RR: 1 (0.89, 1.11)                         | NR                 | 14                              | RR: 0.77 (0.66, 0.9)                       | NR                 |
| Alexander 2017 (76)   | DHA and EPA                              | Coronary heart disease incidence | 9                     | RR: 0.92 (0.78, 1.09)                      | NR                 | 4                               | RR: 0.81 (0.55, 1.19)                      | NR                 |
| Alipanah 2018 (24)    | Self-administered therapy                | Low treatment success            | 4                     | 1.05 (0.96, 1.15)                          | 29                 | 16                              | RR: 1.23 (1.12, 1.37)                      | 93                 |
| Alipanah 2018 (24)    | Self-administered therapy                | Low treatment completion         | 5                     | RR: 1.27 (0.9, 1.79)                       | 45                 | 14                              | RR: 0.91 (0.74, 1.11)                      | 88                 |
| Alipanah 2018 (24)    | Self-administered therapy                | All-cause mortality              | 4                     | RR: 0.73 (0.45, 1.19)                      | 0                  | 23                              | RR: 1.35 (1, 1.84)                         | 90                 |
| Anglemyer 2013 (77)   | Antiretroviral therapy                   | HIV infection                    | 1                     | RR: 0.11 (0.04, 0.32)                      | NA                 | 9                               | RR: 0.58 (0.35, 0.96)                      | 64                 |
| Azad 2017 (21)        | Nonnutritive sweeteners                  | Body Mass Index                  | 3                     | MD: -0.37 (-1.1, 0.36)                     | 9                  | 1                               | MD: 0.77 (0.47, 1.07)                      | NA                 |
| Barnard 2015 (28)     | Surgical abortion by mid-level providers | Failure or incomplete abortion   | 2                     | RR: 2.97 (0.21, 41.82)                     | 70                 | 2                               | RR: 2.47 (1.45, 4.22)                      | 0                  |

|                            |                                          |                                    |    |                        |    |    |                       |    |
|----------------------------|------------------------------------------|------------------------------------|----|------------------------|----|----|-----------------------|----|
| Barnard 2015 (28)          | Surgical abortion by mid-level providers | Complications                      | 2  | RR: 0.99 (0.17, 5.7)   | 0  | 2  | RR: 1.3 (0.57, 2.96)  | 70 |
| Barnard 2015 (28)          | Surgical abortion by mid-level providers | Abortion failure and complications | 2  | RR: 3.07 (0.16, 59.08) | 76 | 3  | RR: 1.33 (0.78, 2.27) | 74 |
| Bellemain-Appaix 2012 (48) | Clopidogrel                              | All-cause mortality                | 7  | OR: 0.8 (0.57, 1.11)   | 0  | 8  | OR: 0.79 (0.52, 1.2)  | 80 |
| Bellemain-Appaix 2012 (48) | Clopidogrel                              | Major bleeding                     | 7  | OR: 1.18 (0.93, 1.5)   | 0  | 8  | OR: 1.16 (0.83, 1.61) | 49 |
| Bellemain-Appaix 2012 (48) | Clopidogrel                              | Coronary heart disease             | 7  | OR: 0.77 (0.66, 0.89)  | 4  | 8  | OR: 0.76 (0.6, 0.95)  | 82 |
| Bellemain-Appaix 2014 (47) | P2Y12 inhibitors                         | All-cause mortality                | 3  | OR: 0.92 (0.43, 1.98)  | 13 | 4  | OR: 0.69 (0.38, 1.25) | 26 |
| Bellemain-Appaix 2014 (47) | P2Y12 inhibitors                         | Major bleeding                     | 3  | OR: 1.45 (0.97, 2.15)  | 25 | 4  | OR: 1.12 (0.87, 1.45) | 0  |
| Bellemain-Appaix 2014 (47) | P2Y12 inhibitors                         | Main composite ischemic endpoint   | 3  | OR: 0.85 (0.67, 1.07)  | 44 | 4  | OR: 0.79 (0.54, 1.15) | 70 |
| Bloomfield 2016 (22)       | Mediterranean diet                       | Breast cancer                      | 1  | RR: 0.53 (0.28, 1.03)  | NA | 13 | RR: 0.96 (0.9, 1.03)  | 52 |
| Bolland 2015 (49)          | Calcium                                  | All fractures                      | 22 | RR: 0.9 (0.83, 0.96)   | 23 | 5  | RR: 1.02 (0.93, 1.12) | 68 |
| Bolland 2015 (49)          | Calcium                                  | Vertebral fracture                 | 12 | RR: 0.86 (0.74, 1)     | 0  | 1  | RR: 1.4 (1.1, 1.9)    | NA |
| Bolland 2015 (49)          | Calcium                                  | Hip fracture                       | 13 | RR: 0.95 (0.76, 1.18)  | 36 | 6  | RR: 1.09 (0.91, 1.3)  | 50 |
| Brenner 2014 (29)          | Sigmoidoscopy                            | Colorectal cancer mortality        | 4  | RR: 0.72 (0.65, 0.8)   | 0  | 1  | RR: 0.59 (0.45, 0.76) | NA |
| Brenner 2014 (29)          | Sigmoidoscopy                            | Colorectal cancer incidence        | 4  | RR: 0.82 (0.75, 0.89)  | 52 | 2  | RR: 0.5 (0.37, 0.69)  | 0  |
| Chowdhury 2012 (78)        | Omega-3                                  | Cerebrovascular disease            | 2  | RR: 0.98 (0.89, 1.08)  | 12 | 10 | RR: 0.9 (0.8, 1.01)   | 17 |
| Chowdhury 2014a (79)       | $\alpha$ -linolenic acid                 | Coronary heart disease             | 4  | RR: 0.97 (0.69, 1.36)  | 52 | 7  | RR: 0.99 (0.86, 1.14) | 62 |
| Chowdhury 2014a (79)       | Omega-3                                  | Coronary heart disease             | 17 | RR: 0.94 (0.86, 1.03)  | 17 | 16 | RR: 0.87 (0.78, 0.97) | 76 |

|                      |                                           |                                                      |    |                         |    |    |                         |    |
|----------------------|-------------------------------------------|------------------------------------------------------|----|-------------------------|----|----|-------------------------|----|
| Chowdhury 2014a (79) | Omega-6                                   | Coronary heart disease                               | 8  | RR: 0.86 (0.69, 1.07)   | 59 | 8  | RR: 0.98 (0.9, 1.06)    | 53 |
| Chowdhury 2014b (80) | Vitamin D                                 | All-cause mortality                                  | 22 | RR: 0.98 (0.94, 1.02)   | NR | 68 | RR: 0.69 (0.65, 0.75)   | NR |
| Chung 2011 (58)      | Vitamin D                                 | Colorectal cancer                                    | 1  | RR: 1.02 (0.6, 1.74)    | NA | 9  | RR: 0.94 (0.91, 0.97)   | NR |
| Chung 2011 (58)      | Vitamin D                                 | Breast cancer                                        | 1  | RR: 0.99 (0.25, 4)      | NA | 4  | RR: 0.99 (0.97, 1.01)   | NR |
| Chung 2016 (56)      | Calcium                                   | Cardiovascular mortality                             | 2  | RR: 1.05 (0.82, 1.33)   | 0  | 6  | RR: 0.99 (0.97, 1.01)   | 7  |
| Ding 2017 (81)       | Dairy                                     | Systolic blood pressure                              | 8  | MD: -0.21 (-0.98, 0.57) | 0  | 27 | MD: -0.11 (-0.2, -0.02) | 30 |
| Fenton 2018 (30)     | Radiation therapy                         | Erectile dysfunction                                 | 1  | RR: 0.91 (0.77, 1.08)   | NA | 7  | RR: 1.3 (1.19, 1.43)    | 33 |
| Fenton 2018 (30)     | Radical Prostatectomy                     | Urinary incontinence                                 | 3  | RR: 2.27 (1.82, 2.84)   | 0  | 5  | RR: 2.92 (1.8, 4.71)    | 67 |
| Fenton 2018 (30)     | Radical Prostatectomy                     | Erectile dysfunction                                 | 3  | RR: 1.6 (1.23, 2.07)    | 87 | 6  | RR: 1.49 (1.33, 1.66)   | 63 |
| Filippini 2017 (43)  | Disease-modifying drugs                   | Conversion to clinically definite multiple sclerosis | 7  | HR: 0.52 (0.46, 0.6)    | 0  | 2  | HR: 0.48 (0.3, 0.78)    | 62 |
| Fluri 2010 (31)      | Extracranial-intracranial arterial bypass | All-cause mortality                                  | 2  | OR: 0.81 (0.62, 1.05)   | 0  | 11 | OR: 1 (0.62, 1.63)      | 0  |
| Fluri 2010 (31)      | Extracranial-intracranial arterial bypass | Stroke                                               | 2  | OR: 0.99 (0.79, 1.23)   | 86 | 15 | OR: 0.8 (0.54, 1.18)    | 3  |
| Fluri 2010 (31)      | Extracranial-intracranial arterial bypass | Stroke mortality or dependency                       | 1  | OR: 0.94 (0.74, 1.21)   | NA | 8  | OR: 0.8 (0.5, 1.29)     | 0  |
| Gargiulo 2016 (32)   | Transcatheter aortic valve                | Early all-cause mortality                            | 5  | OR: 0.8 (0.51, 1.25)    | 0  | 29 | OR: 1.08 (0.84, 1.39)   | 41 |
| Gargiulo 2016 (32)   | Transcatheter aortic valve                | Mid-term all-cause mortality                         | 5  | OR: 0.9 (0.64, 1.26)    | 22 | 18 | OR: 1 (0.81, 1.24)      | 46 |
| Gargiulo 2016 (32)   | Transcatheter aortic valve                | Long-term all-cause mortality                        | 4  | OR: 1.03 (0.65, 1.62)   | 65 | 6  | OR: 1.7 (1.23, 2.35)    | 0  |
| Hartling 2013 (50)   | Treating gestational diabetes mellitus    | High birth weight                                    | 5  | RR: 0.5 (0.35, 0.71)    | 50 | 5  | RR: 0.69 (0.31, 1.54)   | 88 |

|                     |                                                      |                                   |    |                       |    |    |                       |    |
|---------------------|------------------------------------------------------|-----------------------------------|----|-----------------------|----|----|-----------------------|----|
| Hartling 2013 (50)  | Treating gestational diabetes mellitus               | Large-for-gestational age neonate | 3  | RR: 0.56 (0.45, 0.69) | 0  | 4  | RR: 0.43 (0.27, 0.7)  | 58 |
| Hartling 2013 (50)  | Treating gestational diabetes mellitus               | Shoulder dystocia                 | 3  | RR: 0.42 (0.23, 0.77) | 0  | 4  | RR: 0.38 (0.19, 0.78) | 20 |
| Henderson 2019 (51) | Treating asymptomatic bacteriuria                    | Pyelonephritis                    | 12 | RR: 0.24 (0.14, 0.4)  | 56 | 2  | RR: 0.29 (0.15, 0.57) | 0  |
| Higgins 2016 (25)   | Bacillus Calmette-Guérin                             | All-cause mortality               | 3  | RR: 0.67 (0.4, 1.14)  | 58 | 8  | RR: 0.46 (0.3, 0.69)  | 63 |
| Higgins 2016 (25)   | Measles containing vaccines                          | All-cause mortality               | 4  | RR: 0.74 (0.51, 1.07) | 0  | 13 | RR: 0.53 (0.4, 0.7)   | 67 |
| Hopley 2010 (33)    | Total hip arthroplasty                               | Reoperation                       | 4  | RR: 1.09 (0.4, 2.99)  | 30 | 6  | RR: 0.45 (0.18, 1.09) | 26 |
| Hopley 2010 (33)    | Total hip arthroplasty                               | Dislocation                       | 4  | RR: 2.47 (0.69, 8.76) | 0  | 5  | RR: 0.8 (0.27, 2.39)  | 20 |
| Hopley 2010 (33)    | Total hip arthroplasty                               | Deep infection                    | 4  | RR: 1.71 (0.66, 4.45) | 0  | 4  | RR: 0.91 (0.25, 3.28) | 0  |
| Hüpfel 2010 (67)    | Chest-compression-only cardiopulmonary resuscitation | All-cause mortality               | 3  | RR: 0.82 (0.68, 0.99) | 0  | 7  | RR: 1.04 (0.9, 1.2)   | 0  |
| Jamal 2013 (82)     | Non-calcium-based phosphat binders                   | All-cause mortality               | 8  | RR: 0.78 (0.61, 0.98) | 43 | 3  | RR: 0.89 (0.78, 1)    | 0  |
| Jefferson 2010 (46) | Parenteral influenza vaccine                         | Influenza-like illness            | 4  | RR: 0.59 (0.47, 0.73) | 0  | 30 | RR: 0.76 (0.66, 0.87) | 57 |
| Jefferson 2010 (46) | Parenteral influenza vaccine                         | Influenza                         | 3  | RR: 0.42 (0.27, 0.66) | 0  | 10 | RR: 0.5 (0.26, 0.97)  | 67 |
| Jefferson 2012 (34) | Inactivated influenza vaccines                       | Influenza                         | 5  | RR: 0.41 (0.29, 0.59) | 36 | 1  | RR: 0.2 (0.1, 0.39)   | NA |
| Jefferson 2012 (34) | Inactivated influenza vaccines                       | Influenza-like illness            | 5  | RR: 0.64 (0.54, 0.76) | 67 | 2  | RR: 0.29 (0.07, 1.15) | 95 |
| Jin 2012 (83)       | Total flavonoids                                     | Colorectal neoplasms              | 1  | RR: 1.09 (0.93, 1.28) | NA | 3  | RR: 1 (0.8, 1.25)     | 66 |
| Johnston 2019 (23)  | Low red meat                                         | All-cause mortality               | 1  | RR: 0.94 (0.89, 0.99) | NA | 24 | RR: 0.87 (0.82, 0.92) | NR |
| Johnston 2019 (23)  | Low red meat                                         | Cardiovascular mortality          | 1  | RR: 1 (0.84, 1.19)    | NA | 25 | RR: 0.86 (0.79, 0.94) | NR |

|                      |                                                 |                                      |    |                       |    |    |                       |    |
|----------------------|-------------------------------------------------|--------------------------------------|----|-----------------------|----|----|-----------------------|----|
| Johnston 2019 (23)   | Low red meat                                    | Cardiovascular disease               | 1  | RR: 0.97 (0.91, 1.04) | NA | 12 | RR: 0.87 (0.75, 1.01) | NR |
| Kansagara 2013 (52)  | Transfusion                                     | All-cause mortality                  | 6  | RR: 0.94 (0.61, 1.42) | 17 | 11 | RR: 2.49 (1.4, 4.43)  | 97 |
| Keag 2018 (84)       | Caesarean section                               | Urinary incontinence                 | 1  | OR: 0.78 (0.56, 1.08) | NA | 8  | OR: 0.56 (0.47, 0.66) | 71 |
| Keag 2018 (84)       | Caesarean section                               | Fecal incontinence                   | 1  | OR: 3.07 (0.9, 10.49) | NA | 5  | OR: 1.04 (0.73, 1.48) | 72 |
| Kredo 2014 (85)      | Starting and maintaining antiretroviral therapy | All-cause mortality                  | 1  | RR: 0.96 (0.82, 1.12) | NA | 2  | RR: 1.23 (1.14, 1.33) | 0  |
| Kredo 2014 (85)      | Starting and maintaining antiretroviral therapy | Attrition                            | 1  | RR: 0.73 (0.55, 0.97) | NA | 2  | RR: 0.3 (0.05, 1.94)  | 98 |
| Kredo 2014 (85)      | Maintaining antiretroviral therapy              | All-cause mortality                  | 2  | RR: 0.89 (0.59, 1.32) | 0  | 1  | RR: 0.19 (0.05, 0.78) | NA |
| Li 2014 (54)         | Exenatide                                       | Acute pancreatitis                   | 5  | RR: 0.86 (0.22, 3.37) | 0  | 2  | RR: 0.92 (0.69, 1.22) | 0  |
| Li 2016 (53)         | DDP-4 inhibitors                                | Heart failure                        | 34 | RR: 0.9 (0.61, 1.35)  | 0  | 4  | RR: 1.1 (1.04, 1.16)  | 0  |
| Li 2016 (53)         | DDP-4 inhibitors                                | Hospital admission for heart failure | 5  | OR: 1.13 (1, 1.27)    | 0  | 6  | OR: 0.85 (0.74, 0.97) | 33 |
| Matthews 2018 (86)   | Tamoxifen                                       | Heart failure                        | 1  | RR: 0.52 (0.33, 0.71) | NA | 2  | RR: 0.84 (0.65, 1.07) | 10 |
| Menne 2019 (87)      | SGLT-2 inhibitors                               | Acute kidney injury                  | 41 | OR: 0.75 (0.66, 0.84) | 0  | 5  | OR: 0.4 (0.33, 0.48)  | 39 |
| Mesgarpour 2017 (88) | Erythropoiesis stimulating agents               | Venous thromboembolism               | 12 | RR: 1.12 (0.9, 1.4)   | 9  | 5  | RR: 1.87 (0.59, 5.92) | 78 |
| Mesgarpour 2017 (88) | Erythropoiesis stimulating agents               | All-cause mortality                  | 17 | RR: 0.81 (0.71, 0.93) | 0  | 7  | RR: 1.07 (0.65, 1.77) | 91 |
| Moberley 2013 (89)   | Pneumococcal polysaccharide vaccines            | Invasive pneumococcal disease        | 10 | OR: 0.26 (0.14, 0.45) | 0  | 2  | OR: 0.57 (0.36, 0.89) | 0  |
| Molnar 2015 (35)     | Neoral (Cyclosporin)                            | Acute rejection of kidney transplant | 2  | OR: 1.23 (0.64, 2.36) | 11 | 2  | OR: 0.47 (0.27, 0.83) | 0  |
| Navarese 2013 (90)   | Early intervention for NSTEMI-ACS               | All-cause mortality                  | 7  | OR: 0.83 (0.64, 1.09) | 0  | 4  | OR: 0.8 (0.63, 1.02)  | 78 |



|                         |                                                        |                           |    |                         |    |    |                        |    |
|-------------------------|--------------------------------------------------------|---------------------------|----|-------------------------|----|----|------------------------|----|
| Navarese 2013 (90)      | Early intervention for NSTEMI-ACS                      | Myocardial infarction     | 7  | OR: 1.15 (0.65, 2.01)   | 81 | 3  | OR: 0.86 (0.69, 1.08)  | 86 |
| Navarese 2013 (90)      | Early intervention for NSTEMI-ACS                      | Major bleeding            | 7  | OR: 0.76 (0.56, 1.04)   | 0  | 3  | OR: 1.12 (0.69, 1.82)  | 92 |
| Nelson 2010 (36)        | Caesarean section                                      | Anal incontinence, feces  | 1  | OR: 1 (0.49, 2.05)      | NA | 11 | OR: 0.91 (0.72, 1.16)  | 0  |
| Nelson 2010 (36)        | Caesarean section                                      | Anal incontinence, flatus | 1  | OR: 0.83 (0.51, 1.36)   | NA | 4  | OR: 1.02 (0.87, 1.2)   | 0  |
| Nieuwenhuijse 2014 (37) | Ceramic-on-ceramic bearings for total hip arthroplasty | Harris Hip Score          | 7  | MD: -0.23 (-1.09, 0.63) | 24 | 3  | MD: -0.5 (-2.09, 1.09) | 62 |
| Nieuwenhuijse 2014 (37) | High-flexion total knee arthroplasty                   | Flexion                   | 20 | MD: 1.68 (0.28, 3.08)   | 45 | 26 | MD: 3.78 (1.64, 5.92)  | 78 |
| Nieuwenhuijse 2014 (37) | Gender-specific total knee arthroplasty                | Flexion-extension range   | 6  | MD: 1.41 (-0.17, 2.99)  | 6  | 2  | MD: 3.15 (-0.03, 6.34) | 29 |
| Nikooie 2019 (55)       | Second generation antipsychotics                       | Sedation                  | 6  | RR: 1.26 (0.92, 1.72)   | 0  | 3  | RR: 1.84 (0.4, 8.54)   | 34 |
| Nikooie 2019 (55)       | Second generation antipsychotics                       | Neurologic outcomes       | 6  | RR: 0.45 (0.2, 1.01)    | 0  | 5  | RR: 0.76 (0.59, 0.99)  | 0  |
| Ochen 2019 (91)         | Surgery for achilles tendon rupture                    | Re-rupture                | 10 | RR: 0.4 (0.24, 0.69)    | 0  | 18 | RR: 0.42 (0.28, 0.64)  | 31 |
| Ochen 2019 (91)         | Surgery for achilles tendon rupture                    | Complications             | 9  | RR: 3.26 (1.26, 8.41)   | 74 | 15 | RR: 2.93 (2.28, 3.75)  | 0  |
| Pittas 2010 (60)        | Vitamin D                                              | Hypertension              | 1  | RR: 1.01 (0.97, 1.05)   | NA | 3  | RR: 0.57 (0.41, 0.79)  | 0  |
| Raman 2013 (38)         | Carotid endarterectomy                                 | Ipsilateral stroke        | 3  | RR: 0.72 (0.58, 0.9)    | 0  | 2  | RR: 0.47 (0.05, 4.46)  | 83 |
| Raman 2013 (38)         | Carotid endarterectomy                                 | Stroke                    | 3  | RR: 0.68 (0.56, 0.82)   | 18 | 3  | RR: 0.73 (0.43, 1.22)  | 0  |
| Raman 2013 (38)         | Carotid artery stenting                                | Periprocedural stroke     | 2  | RR: 1.75 (0.87, 3.52)   | 0  | 5  | RR: 1.91 (1.72, 2.11)  | 7  |
| Schweizer 2013 (39)     | Nasal deconolization                                   | Surgical site infection   | 5  | RR: 0.63 (0.36, 1.13)   | 50 | 6  | RR: 0.4 (0.28, 0.57)   | 0  |
| Schweizer 2013 (39)     | Glycopeptide prophylaxis                               | Surgical site infection   | 8  | RR: 1.13 (0.9, 1.42)    | 0  | 7  | RR: 0.34 (0.11, 1.1)   | 83 |

|                           |                                    |                                              |    |                         |    |   |                        |    |
|---------------------------|------------------------------------|----------------------------------------------|----|-------------------------|----|---|------------------------|----|
| Silvain 2012 (40)         | Enoxaparin                         | All-cause mortality                          | 6  | RR: 0.88 (0.7, 1.1)     | 0  | 7 | RR: 0.49 (0.39, 0.62)  | 2  |
| Silvain 2012 (40)         | Enoxaparin                         | Major bleeding                               | 9  | RR: 0.88 (0.62, 1.24)   | 53 | 7 | RR: 0.72 (0.56, 0.93)  | 0  |
| Silvain 2012 (40)         | Enoxaparin                         | All-cause mortality or myocardial infarction | 13 | RR: 0.86 (0.74, 0.99)   | 21 | 7 | RR: 0.44 (0.35, 0.55)  | 0  |
| Suthar 2012 (26)          | Antiretroviral therapy             | Tuberculosis infection                       | 2  | HR: 0.5 (0.34, 0.75)    | 0  | 9 | HR: 0.32 (0.25, 0.41)  | 27 |
| Te Morenga 2013 (61)      | Sugar                              | Weight gain                                  | 10 | MD: 0.75 (0.3, 1.19)    | 82 | 4 | MD: 0.31 (-0.07, 0.68) | 99 |
| Te Morenga 2013 (61)      | Sugar                              | Body Mass Index                              | 3  | MD: -0.06 (-0.15, 0.04) | 0  | 4 | MD: 0.02 (0.00, 0.05)  | 75 |
| Thomas 2010 (92)          | Influenza vaccines                 | Influenza-like illness                       | 3  | RR: 0.71 (0.55, 0.9)    | 45 | 1 | RR: 0.31 (0.26, 0.36)  | NA |
| Tickell-Painter 2017 (93) | Mefloquine                         | Discontinuation due to adverse effects       | 3  | RR: 2.86 (1.53, 5.31)   | 0  | 9 | RR: 2.73 (1.83, 4.08)  | 33 |
| Tickell-Painter 2017 (93) | Mefloquine                         | Serious adverse events or effects            | 3  | RR: 0.7 (0.14, 3.53)    | 0  | 2 | RR: 3.08 (0.39, 24.11) | 0  |
| Tickell-Painter 2017 (93) | Mefloquine                         | Nausea                                       | 2  | RR: 1.35 (1.05, 1.73)   | 0  | 3 | RR: 1.85 (1.42, 2.43)  | 0  |
| Tricco 2018 (45)          | Live-attenuated zoster vaccines    | Suspected Herpes Zoster                      | 5  | RR: 0.61 (0.48, 0.93)   | 0  | 3 | RR: 0.48 (0.27, 0.84)  | 99 |
| Vinceti 2018 (59)         | Selenium                           | Cancer                                       | 5  | RR: 0.99 (0.86, 1.14)   | 46 | 7 | RR: 0.75 (0.59, 0.94)  | 46 |
| Vinceti 2018 (59)         | Selenium                           | Cancer mortality                             | 2  | RR: 0.81 (0.49, 1.32)   | 79 | 7 | RR: 0.77 (0.6, 0.97)   | 66 |
| Vinceti 2018 (59)         | Selenium                           | Colorectal cancer                            | 3  | RR: 0.74 (0.41, 1.33)   | 48 | 6 | RR: 0.82 (0.72, 0.94)  | 0  |
| Wilson 2011 (41)          | Traditional birth attendants       | Perinatal mortality                          | 5  | RR: 0.76 (0.64, 0.88)   | 66 | 1 | RR: 0.82 (0.38, 1.78)  | NA |
| Wilson 2011 (41)          | Traditional birth attendants       | Neonatal mortality                           | 6  | RR: 0.79 (0.69, 0.88)   | 41 | 2 | RR: 0.8 (0.47, 1.37)   | 0  |
| Wilson 2019 (42)          | Unicompartmental knee arthroplasty | Venous thromboembolism                       | 2  | RR: 0.24 (0.04, 1.37)   | 0  | 8 | RR: 0.41 (0.29, 0.57)  | 30 |

|                  |                                                    |                                  |   |                          |    |    |                           |    |
|------------------|----------------------------------------------------|----------------------------------|---|--------------------------|----|----|---------------------------|----|
| Wilson 2019 (42) | Unicompartmental knee arthroplasty                 | Flexion-extension range          | 3 | MD: -4.58 (-10.75, 1.59) | 95 | 11 | MD: -8.43 (-10.15, -6.71) | 86 |
| Wilson 2019 (42) | Unicompartmental knee arthroplasty                 | Operation duration               | 3 | MD: -1.72 (-11.89, 8.45) | 90 | 8  | MD: -23.8 (-40.43, -7.17) | 99 |
| Yank 2011 (44)   | Recombinant factor VII                             | All-cause mortality              | 2 | RR: 1.4 (0.49, 4.02)     | 0  | 2  | RR: 0.91 (0.39, 2.12)     | 0  |
| Yank 2011 (44)   | Recombinant factor VII                             | Thromboembolism                  | 2 | RR: 2.06 (0.48, 8.84)    | 16 | 2  | RR: 1.81 (0.67, 4.87)     | 0  |
| Zhang 2016 (94)  | Everolimus-eluting bioresorbable vascular scaffold | Stent thrombosis                 | 5 | OR: 2.05 (0.95, 4.43)    | 0  | 3  | OR: 2.32 (1.06, 5.07)     | 0  |
| Zhang 2016 (94)  | Everolimus-eluting bioresorbable vascular scaffold | All-cause mortality              | 5 | OR: 0.96 (0.46, 2)       | 45 | 4  | OR: 0.57 (0.23, 1.44)     | 0  |
| Zhang 2016 (94)  | Everolimus-eluting bioresorbable vascular scaffold | Coronary heart disease mortality | 3 | OR: 1.4 (0.45, 4.33)     | 44 | 4  | OR: 0.81 (0.38, 1.7)      | 0  |
| Zhang 2017 (95)  | Percutaneous coronary intervention                 | All-cause mortality              | 5 | HR: 1 (0.79, 1.26)       | 22 | 17 | HR: 1.08 (0.92, 1.26)     | 37 |
| Zhang 2017 (95)  | Percutaneous coronary intervention                 | Cardiovascular mortality         | 4 | HR: 1 (0.72, 1.39)       | 21 | 5  | HR: 1.08 (0.51, 2.29)     | 78 |
| Zhang 2017 (95)  | Percutaneous coronary intervention                 | Myocardial infarction            | 5 | HR: 1.39 (0.85, 2.27)    | 58 | 5  | HR: 2.01 (1.64, 2.45)     | 0  |
| Ziff 2015 (96)   | Digoxin                                            | All-cause mortality              | 7 | RR: 0.99 (0.93, 1.05)    | 0  | 8  | RR: 1.61 (1.31, 1.97)     | 65 |
| Ziff 2015 (96)   | Digoxin                                            | Cardiovascular mortality         | 5 | RR: 1.01 (0.94, 1.08)    | 0  | 3  | RR: 2.53 (1.12, 5.71)     | 96 |
| Ziff 2015 (96)   | Digoxin                                            | Hospital admission               | 2 | RR: 0.94 (0.9, 0.99)     | 65 | 4  | RR: 0.91 (0.87, 0.95)     | 64 |

DDP-4= dipeptidyl peptidase 4; DHA= docosahexaenoic acid; EPA= eicosapentaenoic acid; NA= not applicable; NR= not reported; NSTEMI= non-ST elevation acute coronary syndrome; SGLT-2= sodium glucose transporter 2.

**Figures S2a to S7: Forest Plots**

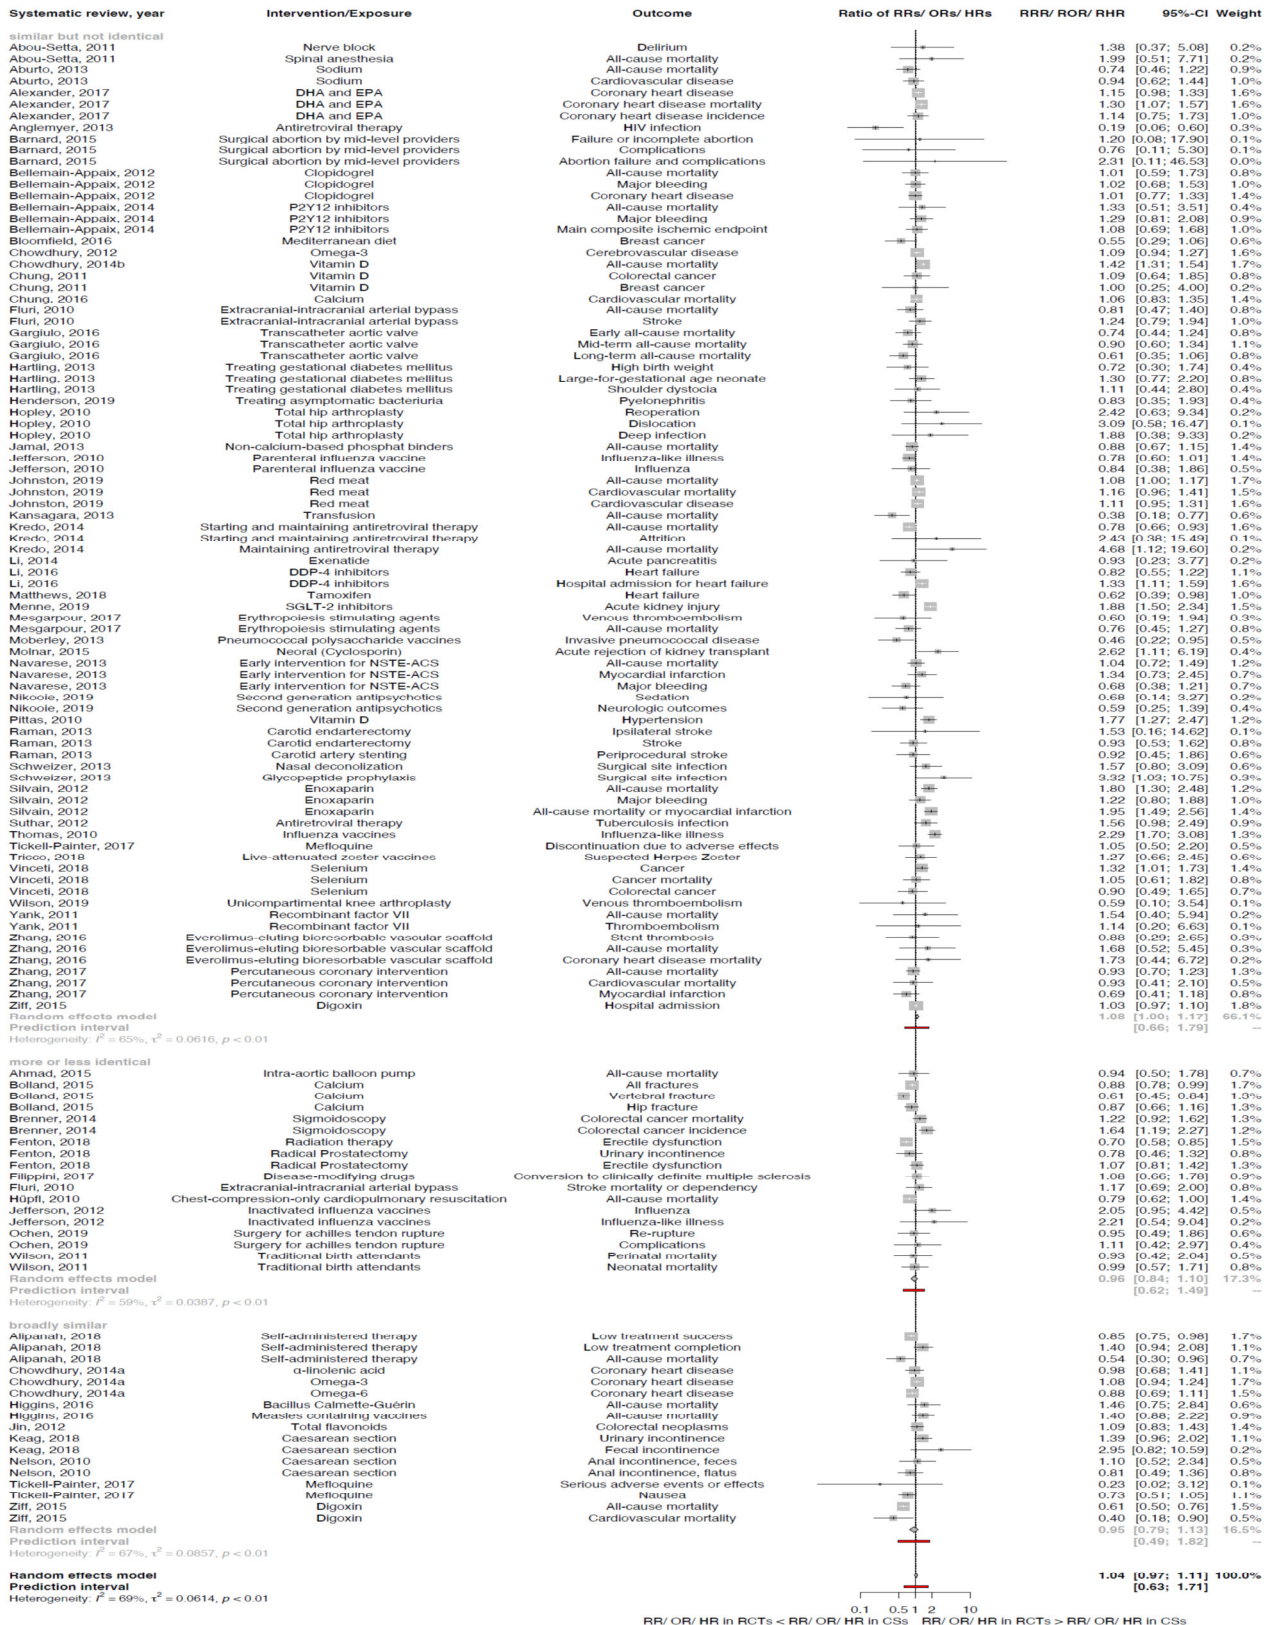

Figure S2a. Forest plot for binary outcomes, pooled ratio of ratios (RoR) for bodies of evidence from randomized controlled trials vs. cohort studies stratified by population similarity degree.

CSs= cohort studies; DDP-4= dipeptidyl peptidase 4; DHA= docosahexaenoic acid; EPA= eicosapentaenoic acid; HR= hazard ratio; NSTE-ACS= non-ST elevation acute coronary syndrome; OR= odds ratio; RCTs= randomized controlled trials; RHR= ratio of hazard ratios; ROR= ratio of odds ratios; RR= risk ratio; RRR= ratio of risk ratios; SGLT-2= sodium glucose transporter 2.

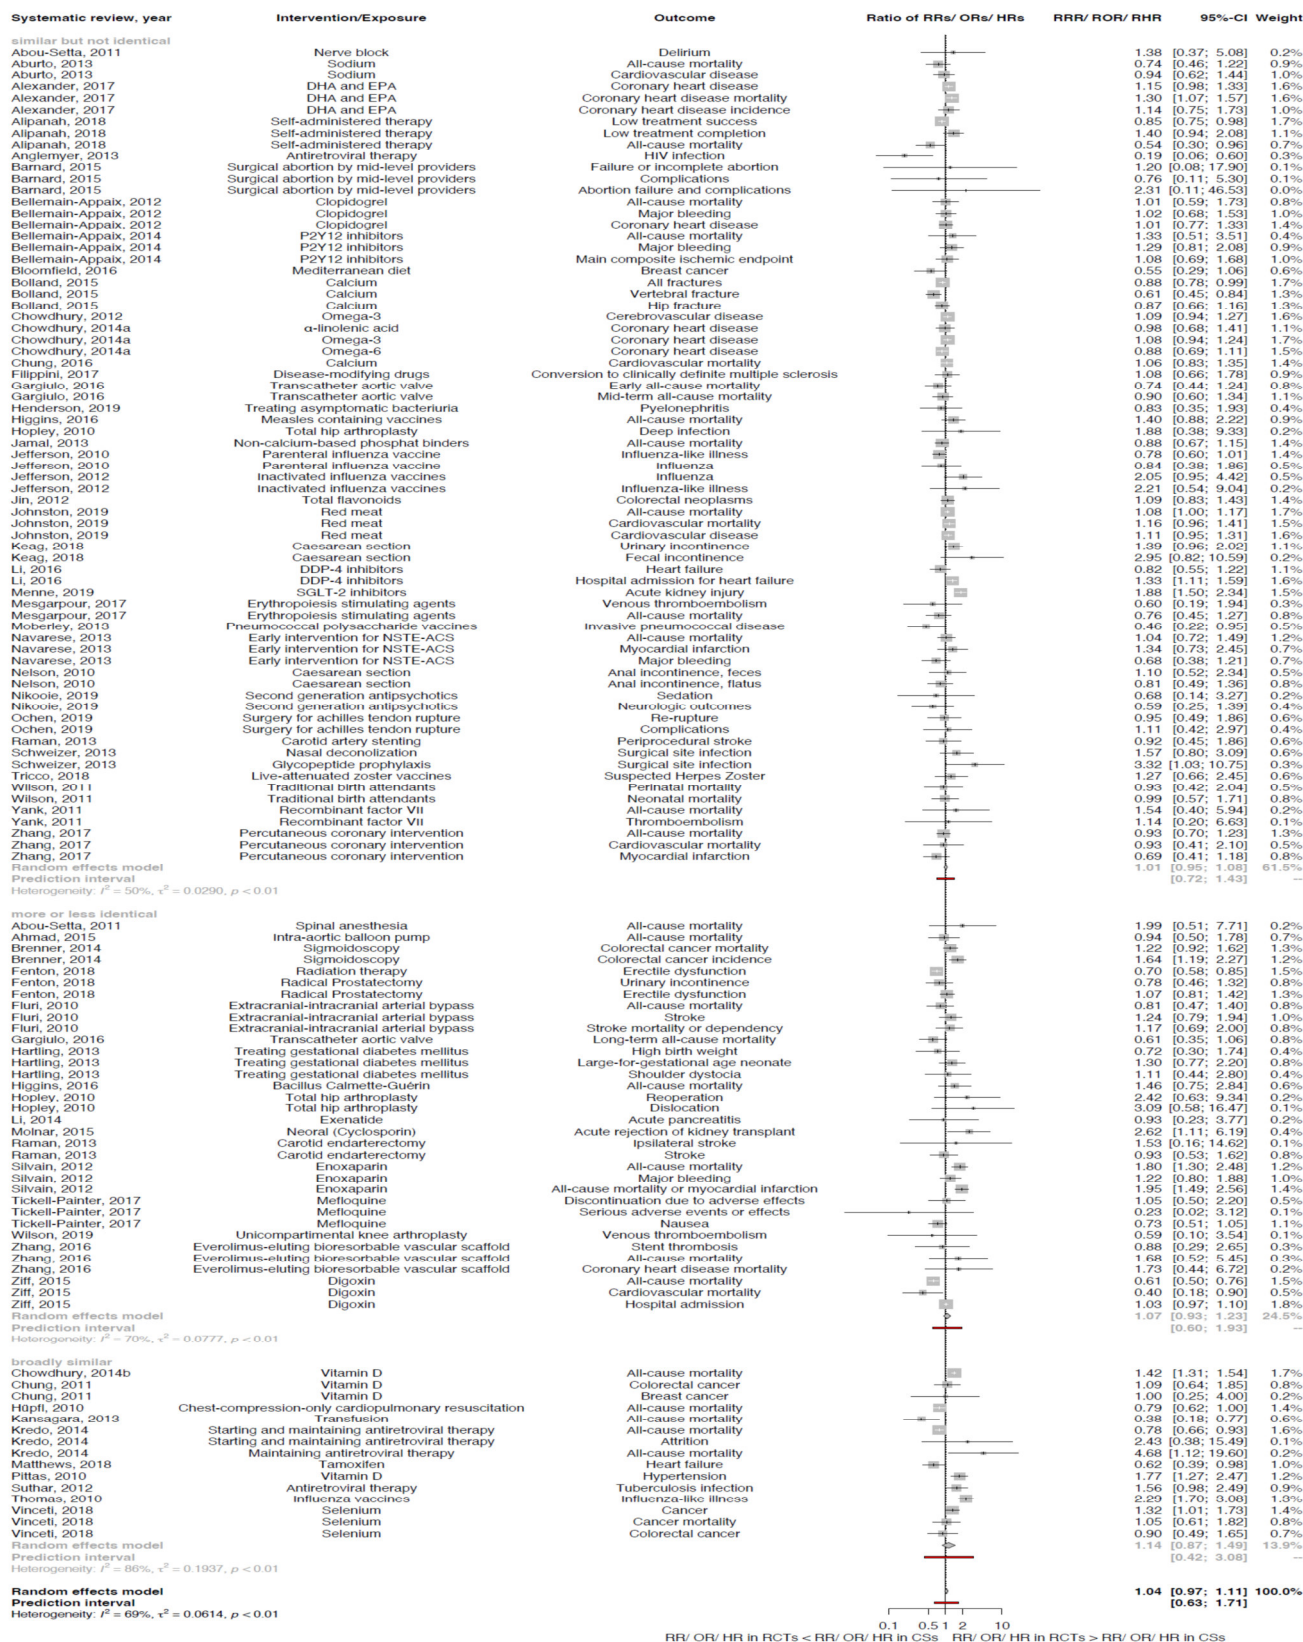

Figure S2b. Forest plot for binary outcomes, pooled ratio of ratios (RoR) for bodies of evidence from randomized controlled trials vs. cohort studies stratified by intervention/exposure similarity degree.

CSs= cohort studies; DDP-4= dipeptidyl peptidase 4; DHA= docosahexaenoic acid; EPA= eicosapentaenoic acid; HR= hazard ratio; NSTE-ACS= non-ST elevation acute coronary syndrome; OR= odds ratio; RCTs= randomized controlled trials; RHR= ratio of hazard ratios; ROR= ratio of odds ratios; RR= risk ratio; RRR= ratio of risk ratios; SGLT-2= sodium glucose transporter 2.

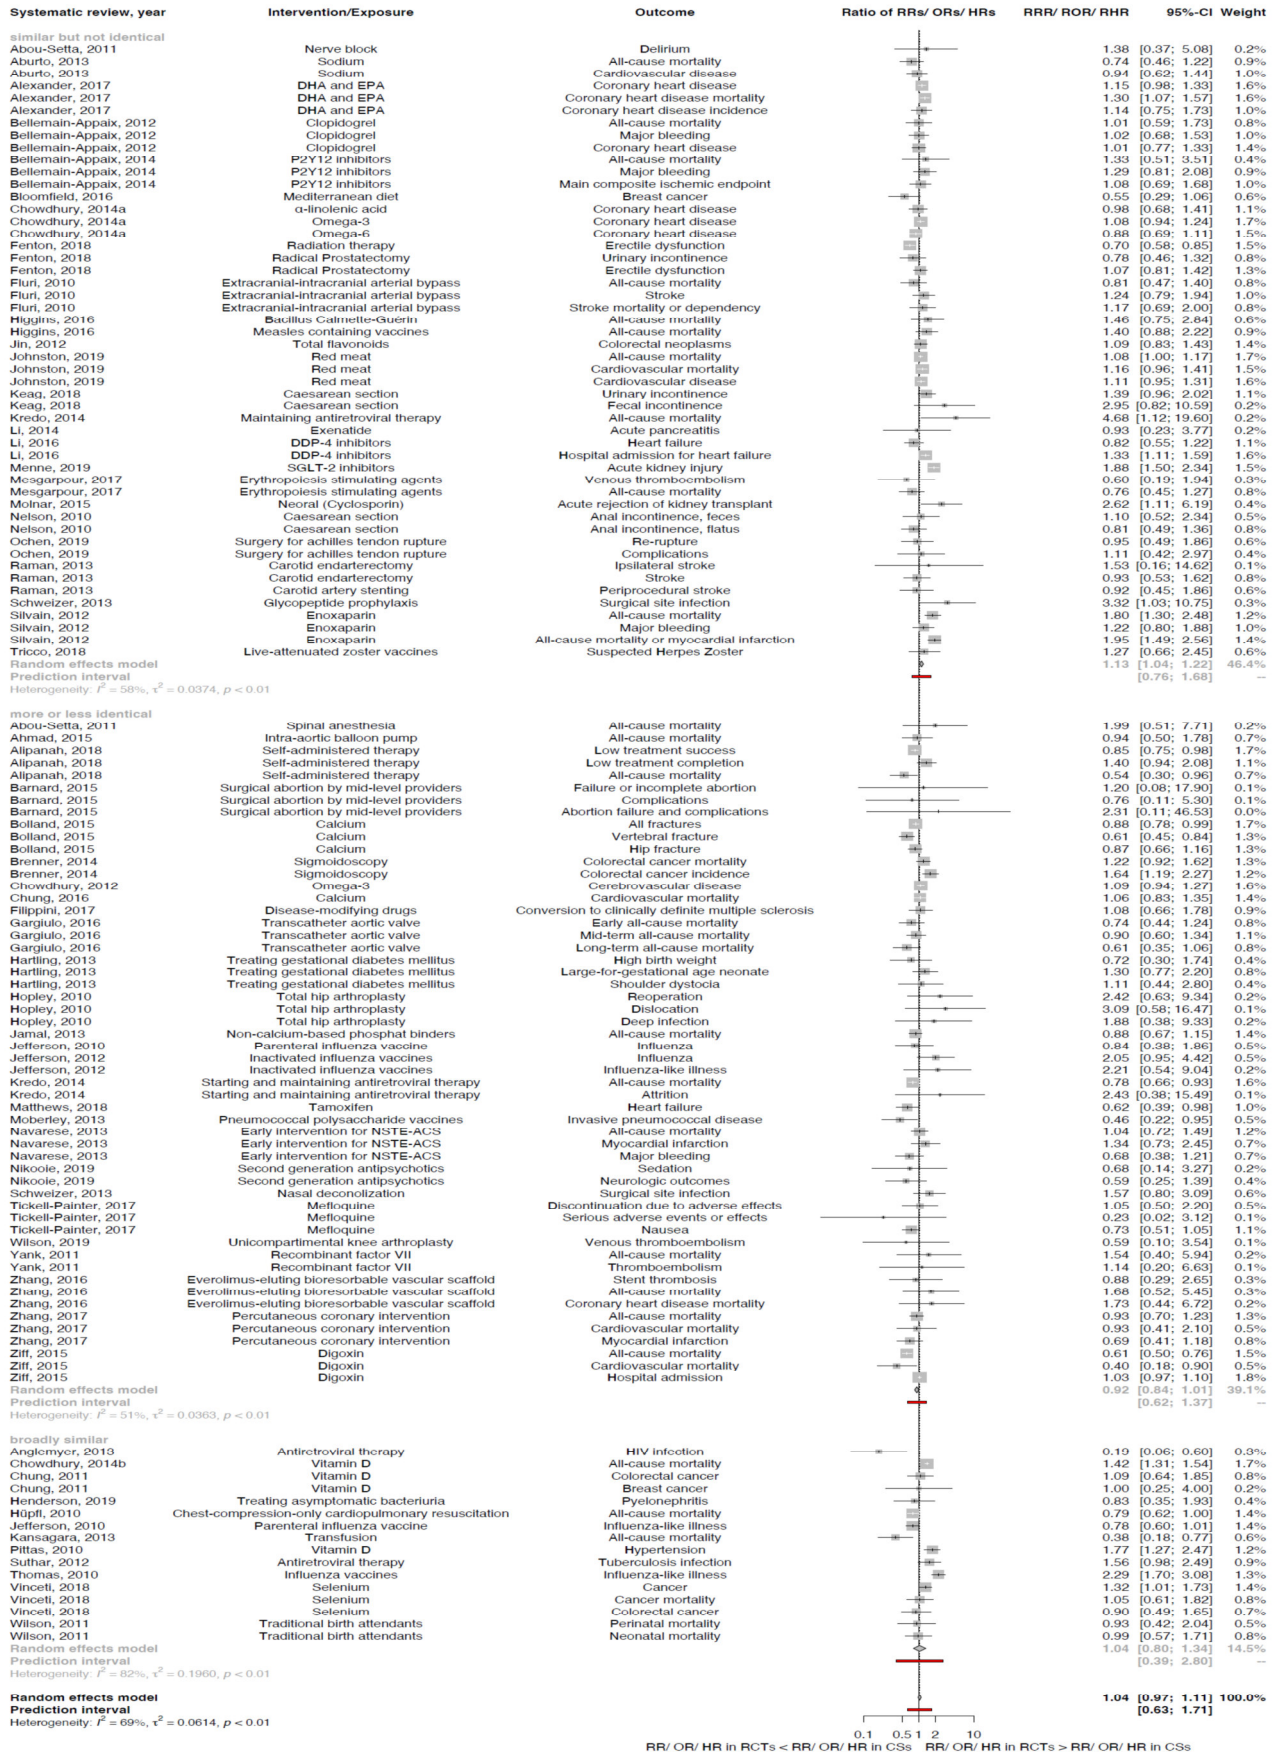

Figure S2c. Forest plot for binary outcomes, pooled ratio of ratios (RoR) for bodies of evidence from randomized controlled trials vs. cohort studies stratified by comparator similarity degree.

CSs= cohort studies; DDP-4= dipeptidyl peptidase 4; DHA= docosahexaenoic acid; EPA= eicosapentaenoic acid; HR= hazard ratio; NSTEMI-ACS= non-ST elevation acute coronary syndrome; OR= odds ratio; RCTs= randomized controlled trials; RHR= ratio of hazard ratios; ROR= ratio of odds ratios; RR= risk ratio; RRR= ratio of risk ratios; SGLT-2= sodium glucose transporter 2.

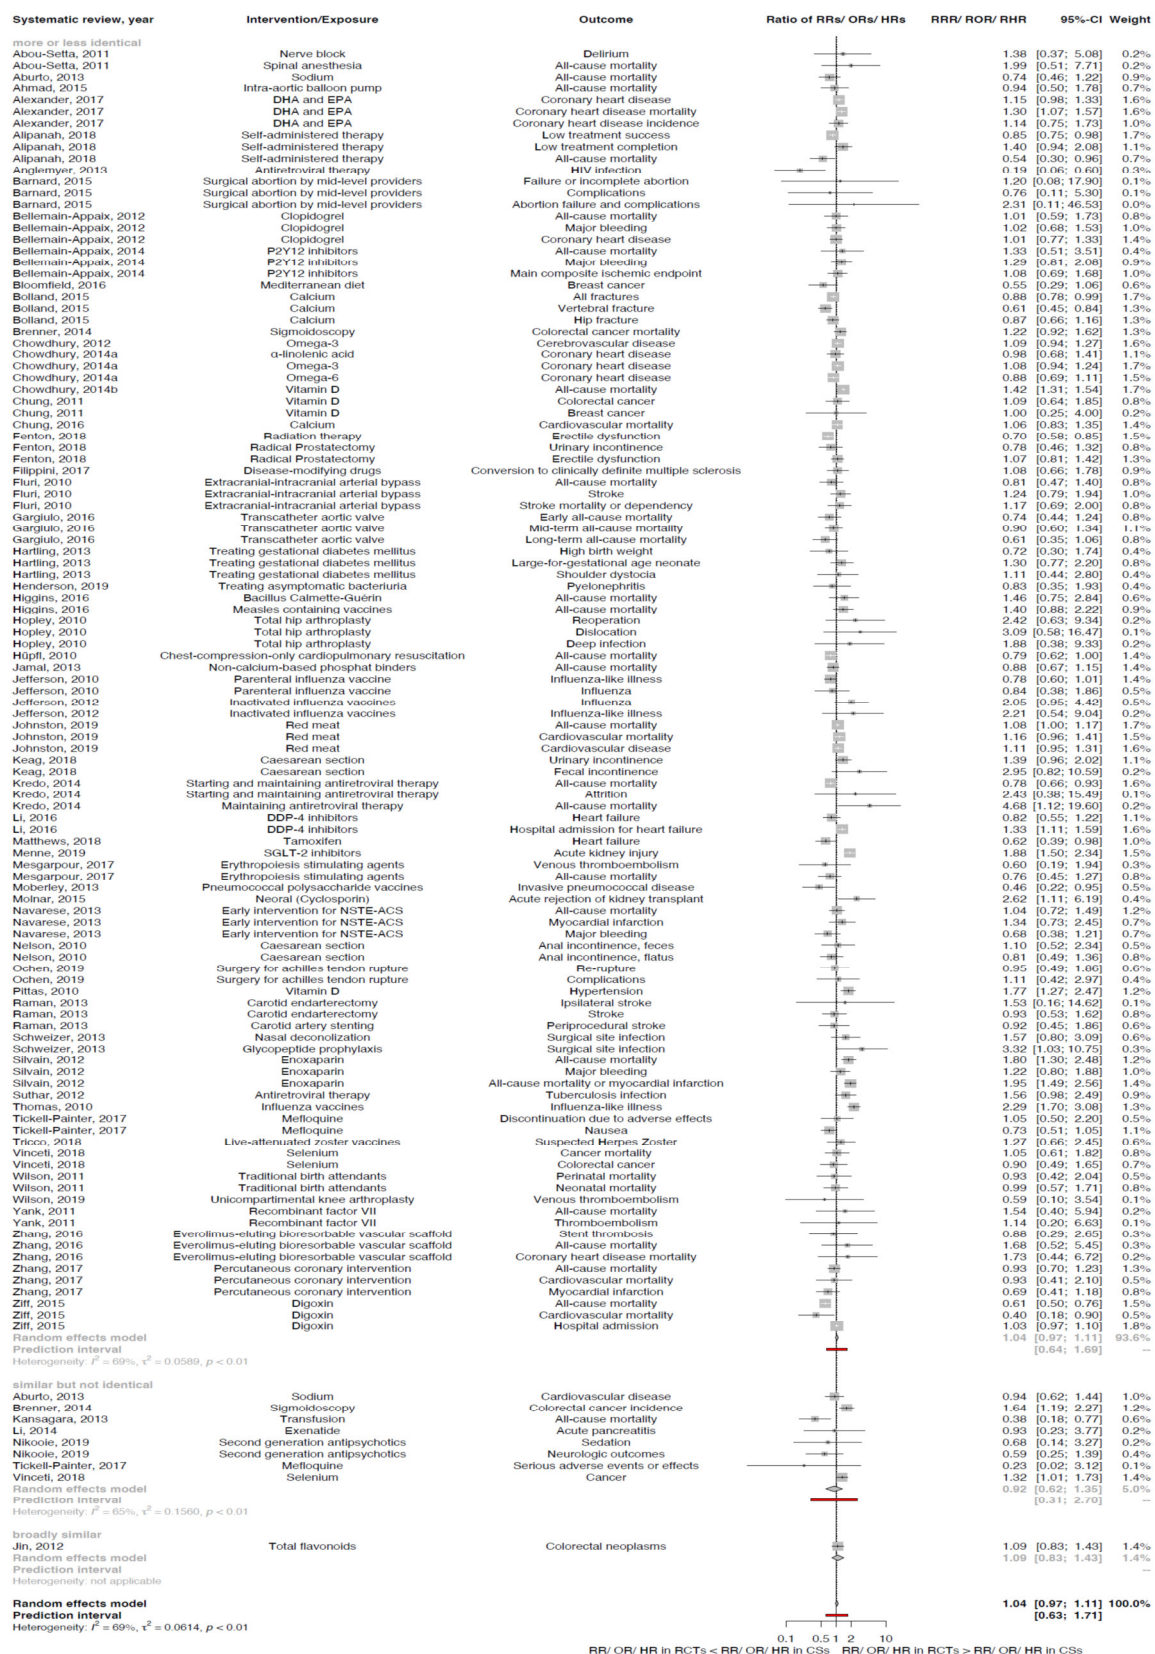

Figure S2d. Forest plot for binary outcomes, pooled ratio of ratios (RoR) for bodies of evidence from randomized controlled trials vs. cohort studies stratified by outcome similarity degree.

CSs= cohort studies; DDP-4= dipeptidyl peptidase 4; DHA= docosahexaenoic acid; EPA= eicosapentaenoic acid; HR= hazard ratio; NSTEMI-ACS= non-ST elevation acute coronary syndrome; OR= odds ratio; RCTs= randomized controlled trials; RHR= ratio of hazard ratios; ROR= ratio of odds ratios; RR= risk ratio; RRR= ratio of risk ratios; SGLT-2= sodium glucose transporter 2.



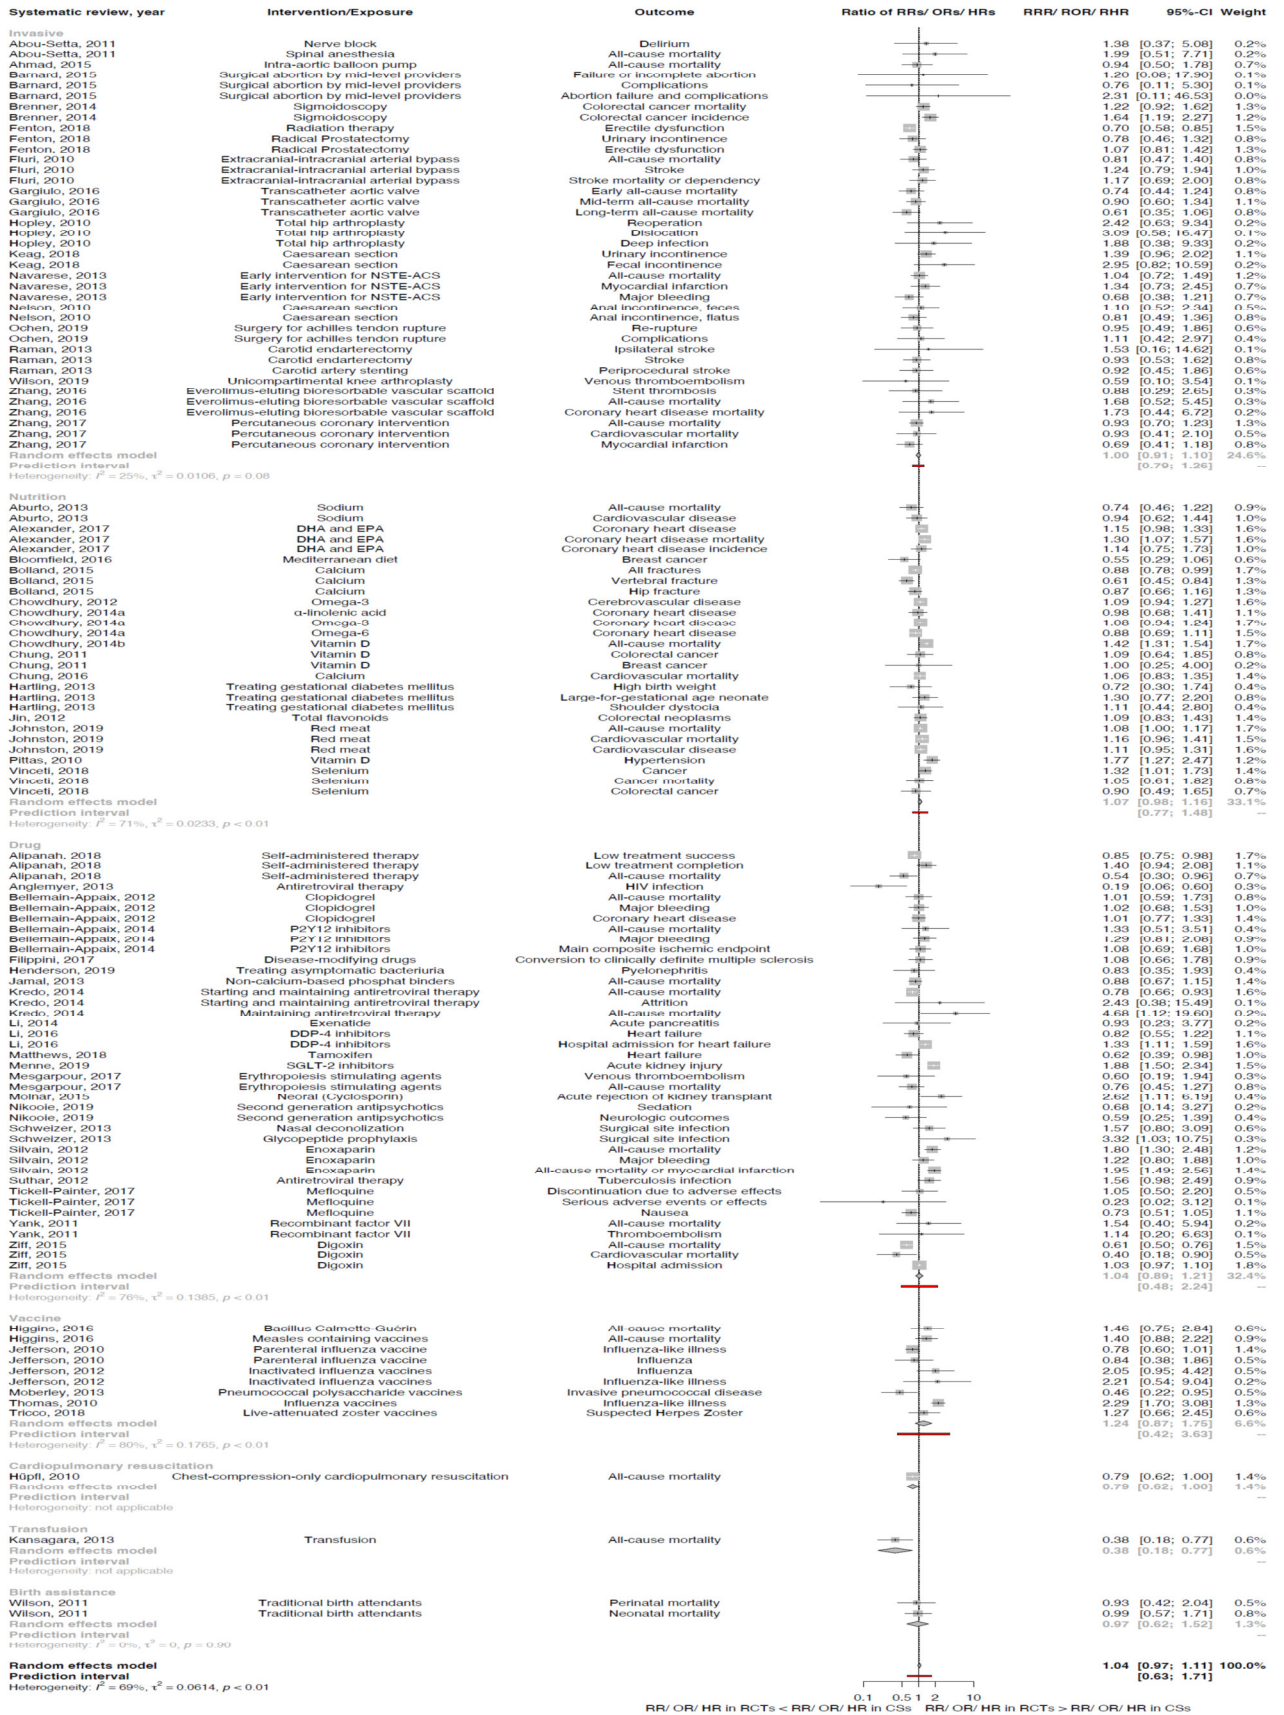

Figure S3. Forest plot for binary outcomes, pooled ratio of ratios (RoR) for bodies of evidence from randomized controlled trials vs. cohort studies stratified by intervention-type.

CSs= cohort studies; DDP-4= dipeptidyl peptidase 4; DHA= docosahexaenoic acid; EPA= eicosapentaenoic acid; HR= hazard ratio; NSTEMI-ACS= non-ST elevation acute coronary syndrome; OR= odds ratio; RCTs= randomized controlled trials; RHR= ratio of hazard ratios; ROR= ratio of odds ratios; RR= risk ratio; RRR= ratio of risk ratios; SGLT-2= sodium glucose transporter 2.

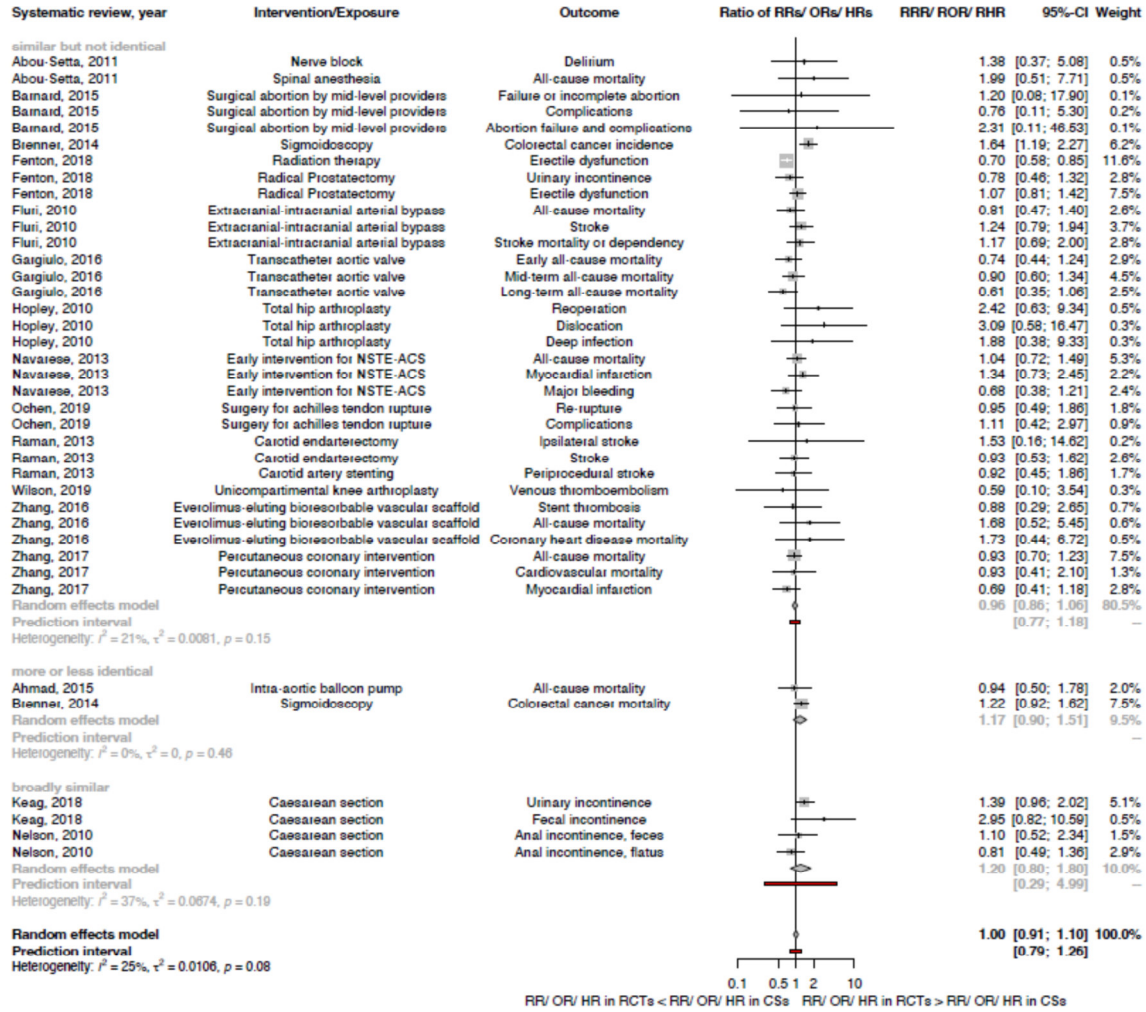

Figure S3a. Forest plot for binary outcomes, pooled ratio of ratios (RoR) for bodies of evidence (BoE) from randomized controlled trials vs. cohort studies, BoE with invasive procedures as intervention stratified by overall PI/ECO\*-similarity degree.

\*PI/ECO= population, intervention/ exposure, comparator, outcome; CSs= cohort studies; HR= hazard ratio; NSTEMI-ACS= non-ST elevation acute coronary syndrome; OR= odds ratio; RCTs= randomized controlled trials; RHR= ratio of hazard ratios; ROR= ratio of odds ratios; RR= risk ratio; RRR= ratio of risk ratios.

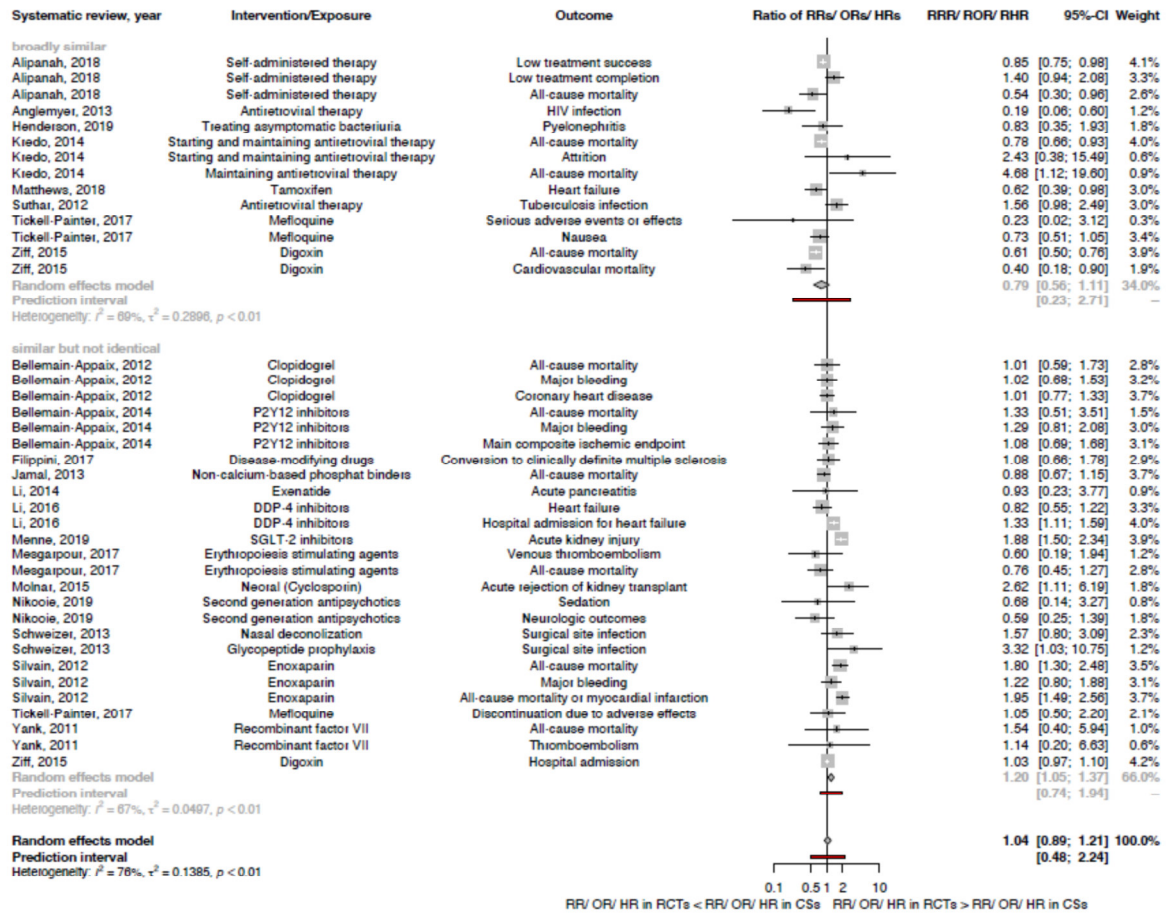

Figure S3b. Forest plot for binary outcomes, pooled ratio of ratios (RoR) for bodies of evidence (BoE) from randomized controlled trials vs. cohort studies, BoE with drugs as intervention stratified by overall PI/ECO-similarity degree.

\*PI/ECO= population, intervention/ exposure, comparator, outcome; CSs= cohort studies; DDP-4= dipeptidyl peptidase 4; HR= hazard ratio; OR= odds ratio; RCTs= randomized controlled trials; RHR= ratio of hazard ratios; ROR= ratio of odds ratios; RR= risk ratio; RRR= ratio of risk ratios; SGLT-2= sodium glucose transporter 2.

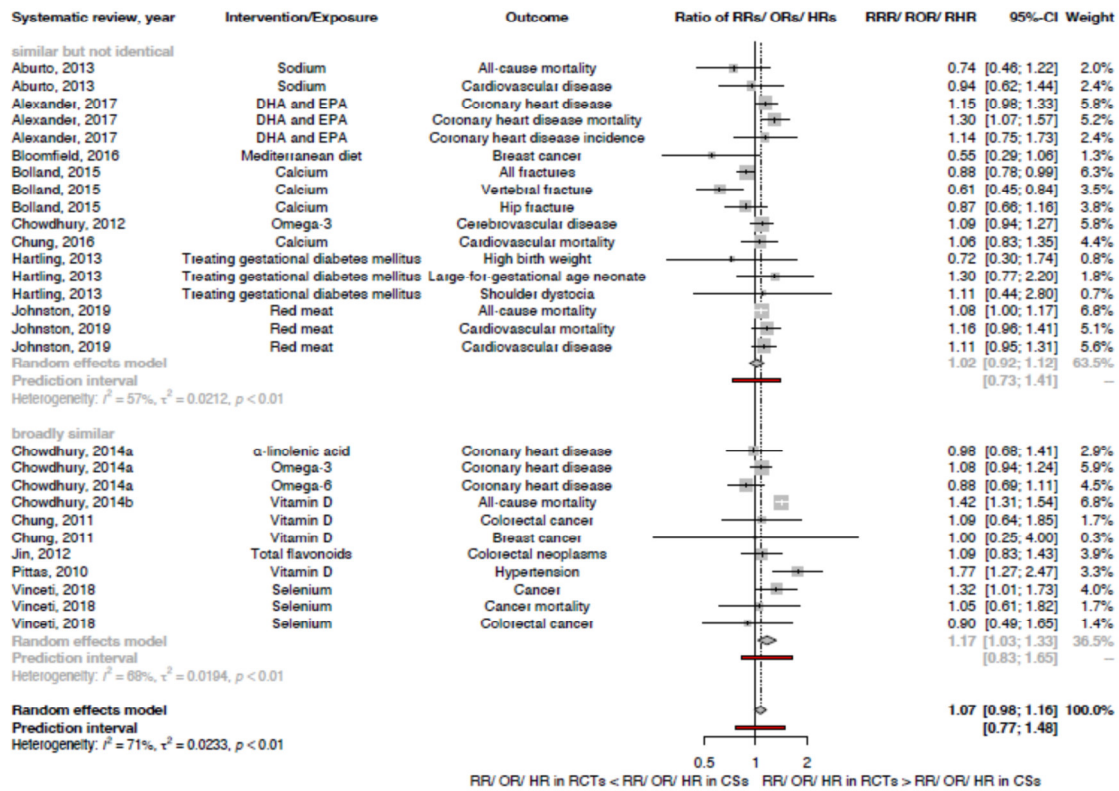

Figure S3c. Forest plot for binary outcomes, pooled ratio of ratios (RoR) for bodies of evidence (BoE) from randomized controlled trials vs. cohort studies, BoE with nutrition as intervention stratified by overall PI/ECO-similarity degree.

\*PI/ECO= population, intervention/ exposure, comparator, outcome; CSs= cohort studies; DHA= docosahexaenoic acid; EPA= eicosapentaenoic acid; HR= hazard ratio; OR= odds ratio; RCTs= randomized controlled trials; RHR= ratio of hazard ratios; ROR= ratio of odds ratios; RR= risk ratio; RRR= ratio of risk ratios.

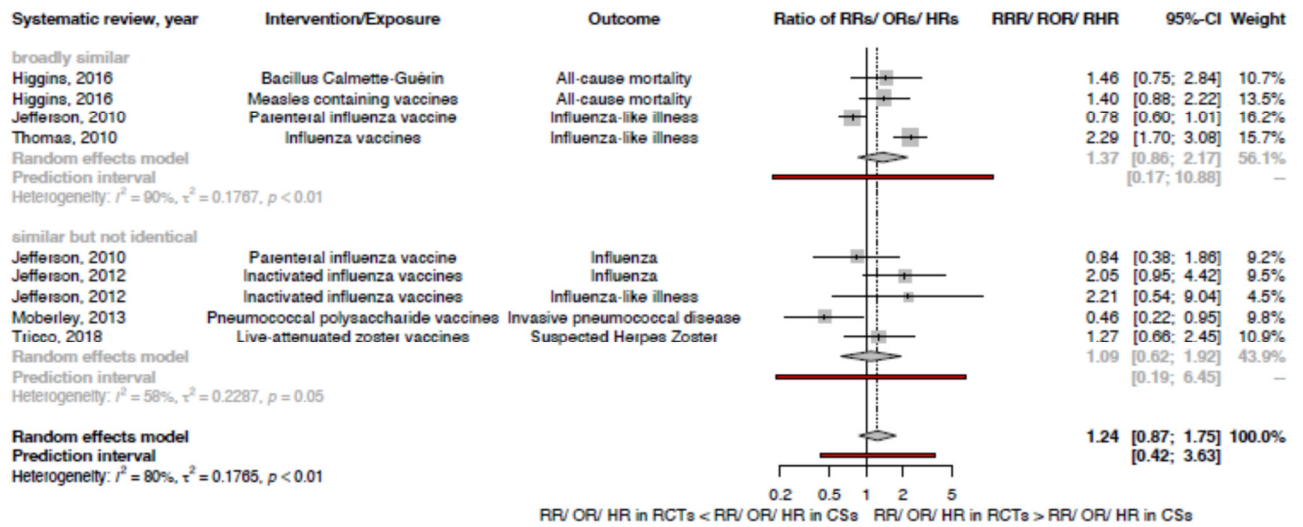

Figure S3d. Forest plot for binary outcomes, pooled ratio of ratios (RoR) for bodies of evidence (BoE) from randomized controlled trials vs. cohort studies, BoE with vaccines as intervention stratified by overall PI/ECO-similarity degree.

\*PI/ECO= population, intervention/ exposure, comparator, outcome; CSs= cohort studies; HR= hazard ratio; OR= odds ratio; RCTs= randomized controlled trials; RHR= ratio of hazard ratios; ROR= ratio of odds ratios; RR= risk ratio; RRR= ratio of risk ratios.

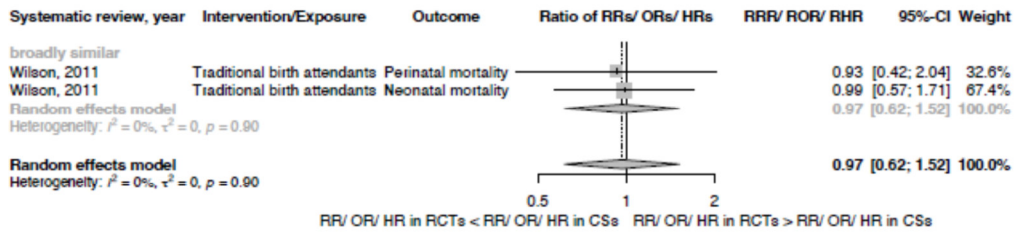

Figure S3e. Forest plot for binary outcomes, pooled ratio of ratios (RoR) for bodies of evidence (BoE) from randomized controlled trials vs. cohort studies, BoE with birth assistance as intervention stratified by overall PI/ECO-similarity degree.

\*PI/ECO= population, intervention/ exposure, comparator, outcome; CSs= cohort studies; HR= hazard ratio; OR= odds ratio; RCTs= randomized controlled trials; RHR= ratio of hazard ratios; ROR= ratio of odds ratios; RR= risk ratio; RRR= ratio of risk ratios.

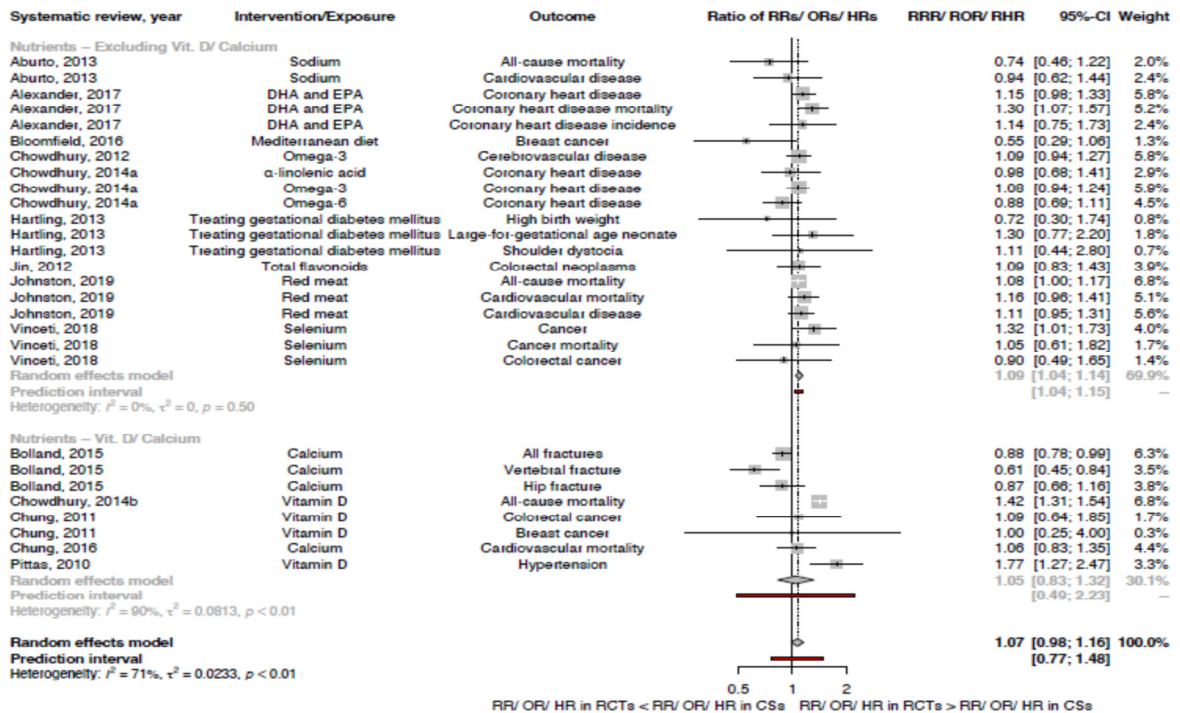

Figure S4. Forest plot for binary outcomes, pooled ratio of ratios (RoR) for bodies of evidence from randomized controlled trials vs. cohort studies, exploratory analysis for BoE with nutrition as intervention: Vitamin D/ Calcium as intervention vs. other nutrition-interventions.

CSs= cohort studies; DHA= docosahexaenoic acid; EPA= eicosapentaenoic acid; HR= hazard ratio; OR= odds ratio; RCTs= randomized controlled trials; RHR= ratio of hazard ratios; ROR= ratio of odds ratios; RR= risk ratio; RRR= ratio of risk ratios.

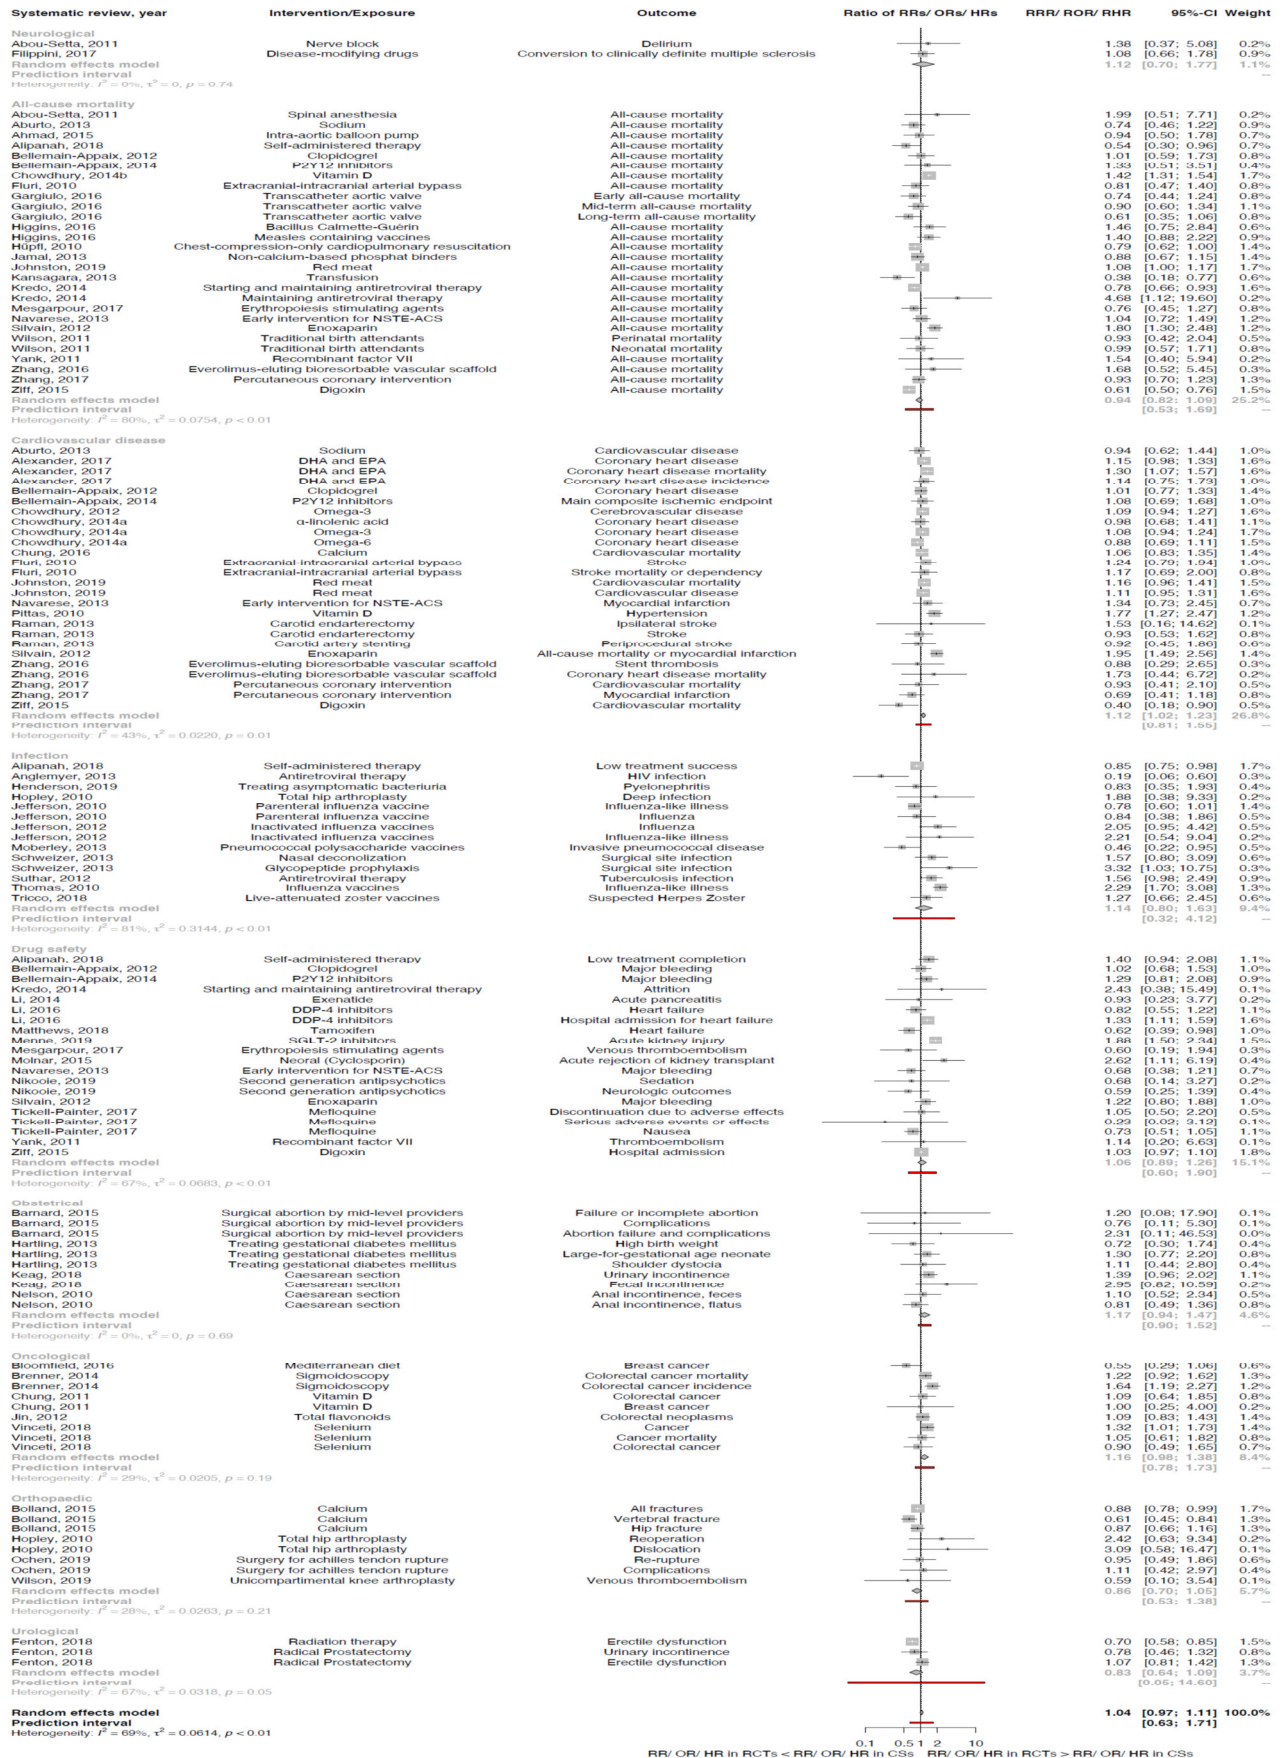

Figure S5. Forest plot for binary outcomes, pooled ratio of ratios (RoR) for bodies of evidence from randomized controlled trials vs. cohort studies stratified by outcome-category.

CSs= cohort studies; DDP-4= dipeptidyl peptidase 4; DHA= docosahexaenoic acid; EPA= eicosapentaenoic acid; HR= hazard ratio; NSTE-ACS= non-ST elevation acute coronary syndrome; OR= odds ratio; RCTs= randomized controlled trials; RHR= ratio of hazard ratios; ROR= ratio of odds ratios; RR= risk ratio; RRR= ratio of risk ratios; SGLT-2= sodium glucose transporter 2.

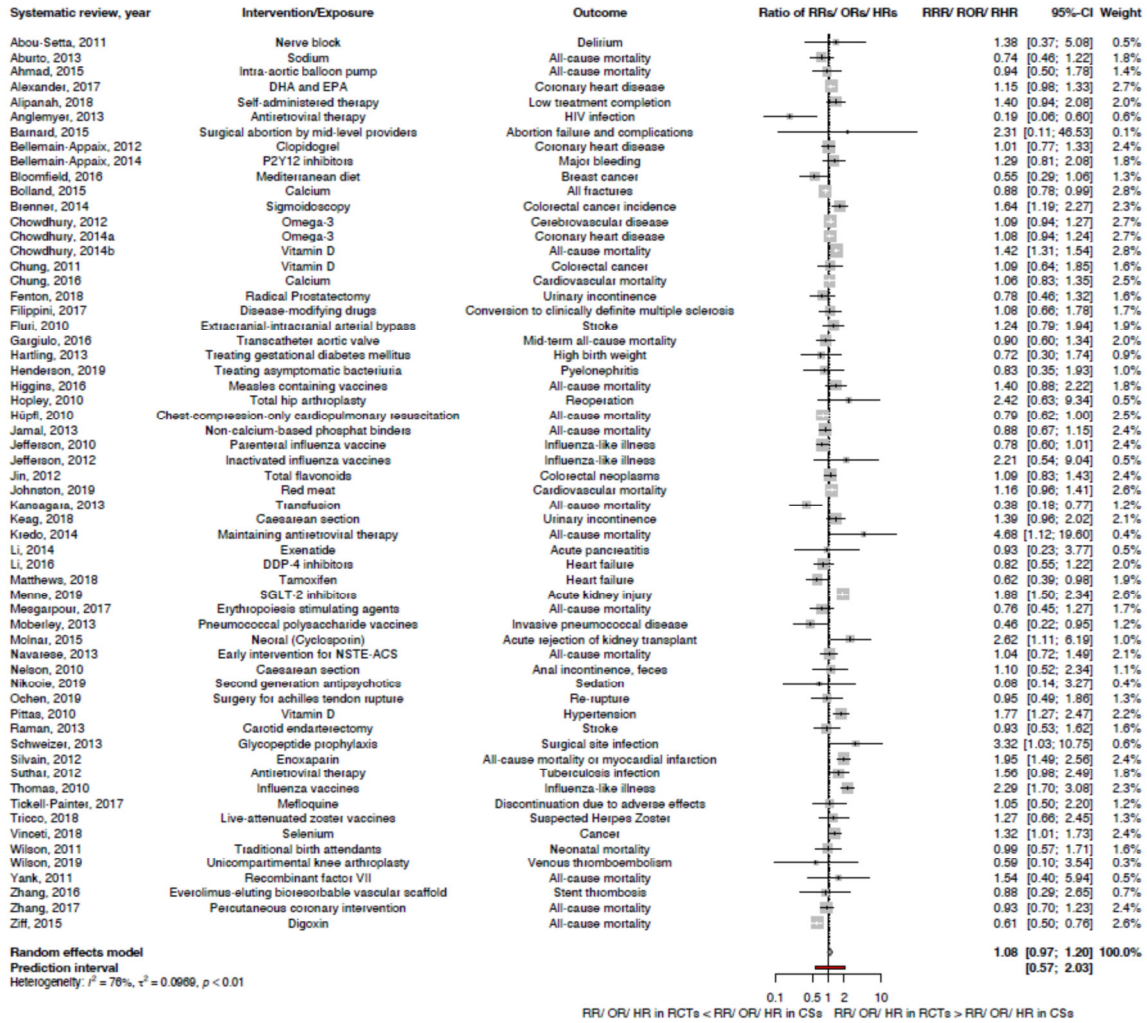

Figure S6. Forest plot for binary outcomes, pooled ratio of ratios (RoR) for bodies of evidence (BoE) from randomized controlled trials (RCTs) vs. cohort studies, sensitivity analysis including only the BoE-pair with the highest number of RCTs per systematic review.

CSs= cohort studies; DDP-4= dipeptidyl peptidase 4; DHA= docosahexaenoic acid; EPA= eicosapentaenoic acid; HR= hazard ratio; NSTEMI-ACS= non-ST elevation acute coronary syndrome; OR= odds ratio; RCTs= randomized controlled trials; RHR= ratio of hazard ratios; ROR= ratio of odds ratios; RR= risk ratio; RRR= ratio of risk ratios; SGLT-2= sodium glucose transporter 2.



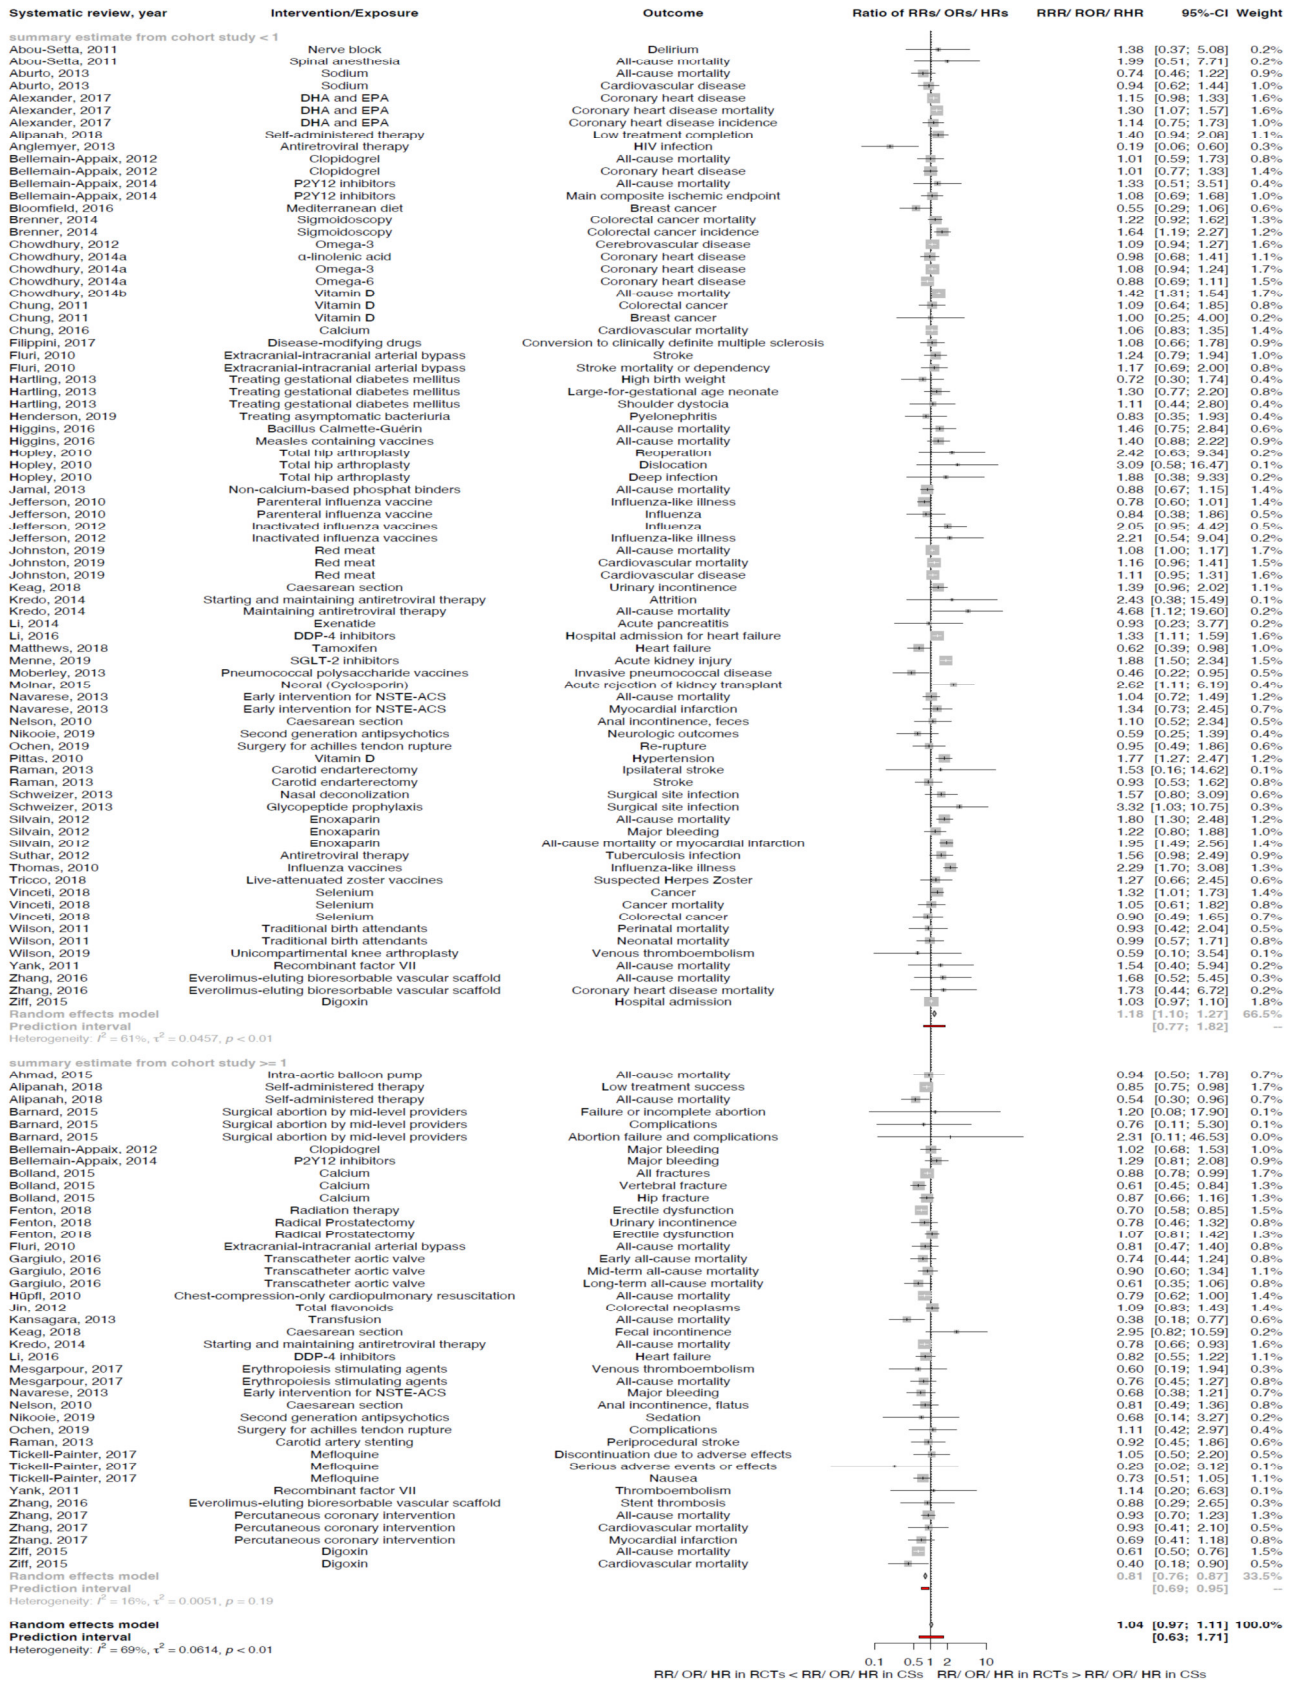

Figure S7. Forest plot for binary outcomes, pooled ratio of ratios (RoR) for bodies of evidence from randomized controlled trials vs. cohort studies, sensitivity analysis by direction of cohort study summary effect estimate (HR, OR, RR<1 vs. HR, OR, RR ≥ 1).

CSs= cohort studies; DDP-4= dipeptidyl peptidase 4; DHA= docosahexaenoic acid; EPA= eicosapentaenoic acid; HR= hazard ratio; NSTE-ACS= non-ST elevation acute coronary syndrome; OR= odds ratio; RCTs= randomized controlled trials; RHR= ratio of hazard ratios; ROR= ratio of odds ratios; RR= risk ratio; RRR= ratio of risk ratios; SGLT-2= sodium glucose transporter 2.
